# Supplementary material for: Copper-catalyzed trichloromethylative carbonylation of ethylene
Source: Royal Society of Chemistry journal article supplement (doi:10.1039/d3sc05530b), 2023-12-14

# Supporting Information

## Copper-Catalyzed Trichloromethylative Carbonylation of Ethylene

Youcan Zhang,<sup>†[b,c]</sup> Bing-Hong Teng,<sup>†[a,c]</sup> and Xiao-Feng Wu<sup>\*[c,d]</sup>

[a] School of Chemistry and Chemical Engineering, Liaoning Normal University, 850 Huanghe Road, Dalian 116029, China; [b] College of Chemistry and Chemical Engineering, Shanghai University of Engineering Science, Shanghai 201620, China; [c] Dalian National Laboratory for Clean Energy, Dalian Institute of Chemical Physics, Chinese Academy of Sciences, 116023 Dalian, Liaoning, China; [d] Leibniz-Institut für Katalyse e.V., Albert-Einstein-Straße 29a, 18059 Rostock, Germany

\* E-Mail: xwu2020@dicp.ac.cn

### Contents

|                                                                                            |    |
|--------------------------------------------------------------------------------------------|----|
| 1. General conditions.....                                                                 | 2  |
| 2. General procedures.....                                                                 | 3  |
| 2.1 General Procedure: trichloromethylative carbonylation of ethylene.....                 | 3  |
| 2.2 Supplementary Tables .....                                                             | 4  |
| 3. Analytical data.....                                                                    | 7  |
| 5. <sup>1</sup> H-, <sup>13</sup> C- and <sup>19</sup> F-NMR spectra copy of products..... | 25 |

## 1. General conditions

Unless stated otherwise, all reactions were carried out under a carbon monoxide or nitrogen atmosphere. All reagents and solvents were purchased from Adamas-beta, Energy Chemical, Sigma-Aldrich, Bidepharm, TCI, or Alfa Aesar and used without purification. Anhydrous solvents were purchased from Energy Chemical and used as received. NMR spectra were recorded at ambient temperature using Bruker Avance III 400 MHz NMR and Bruker AVANCE III HD 700MHz NMR spectrometers. Chemical shifts (ppm) are given relative to solvent: references for CDCl<sub>3</sub> were 7.26 ppm (<sup>1</sup>H NMR) and 77.0 ppm (<sup>13</sup>C NMR); CD<sub>3</sub>OD were 3.31 ppm (<sup>1</sup>H NMR) and 49.0 ppm (<sup>13</sup>C NMR); DMSO-d<sub>6</sub> were 2.50 ppm (<sup>1</sup>H NMR) and 39.5 ppm (<sup>13</sup>C NMR). Multiplets were assigned as s (singlet), br.s (broad singlet), d (doublet), t (triplet), q (quartet), dd (doublet of doublets), dt (doublet of triplets), td (triplet of doublets) and m (multiplet). GC-yields were calculated using hexadecane as an internal standard. HRMS data was obtained with Micromass HPLC-Q-TOF mass spectrometer (ESI) or Agilent 6540 Accurate-MS spectrometer (Q-TOF). Analytical thin layer chromatography (TLC) was carried out using pre-coated (0.20 mm thickness) silica gel plates with F254 indicator. The products were isolated from the reaction mixture by column chromatography on silica gel 200-300 mesh. Because of the high toxicity of carbon monoxide, all of the reactions should be performed in an autoclave. The laboratory should well-equipped with a CO detector and alarm system. For blue light irradiation, two Kessil PR160L-456 nm blue lamps (19 V DC 40 W Max) were placed ca. 7 cm from the reaction vial inside the autoclave at room temperature.

## 2. General procedures

### 2.1 General Procedure: trichloromethylative carbonylation of ethylene

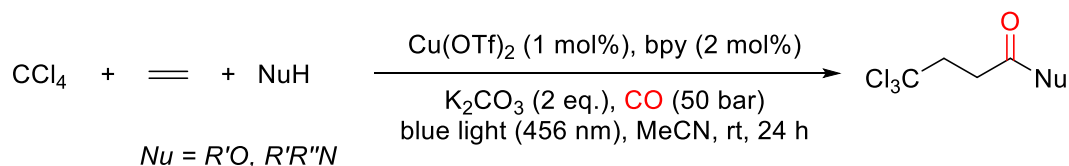

To each screw-cap vial (4 ml) equipped with a septum, a small cannula, and a stirring bar was added  $\text{Cu}(\text{OTf})_2$  (1.5 mg, 1 mol%), bpy (1.3 mg, 2 mol%),  $\text{K}_2\text{CO}_3$  (110.6 mg, 0.8 mmol, 2.0 equiv.), and NuH (0.4 mmol, if the nucleophile is solid). The vials then were purged with argon three times before added dry MeCN (2 mL),  $\text{CCl}_4$  (200  $\mu\text{L}$ , 2 mmol, 5.0 equiv.), and NuH (0.4 mmol, if the nucleophile is liquid). These vials were transferred into a 500 mL photoautoclav. The closed autoclave was flushed one time with nitrogen (~ 5 bar), two times with CO (~ 5 bar), and a pressure of ethylene (1 bar) and CO (50 bar) were charged. The autoclave was then placed on a magnetic stirrer. The reaction mixture was stirred while being irradiated with 40 W blue light (Kessil PR160L-456 nm, intensity = 50) at room temperature (25-30 °C) for 24 h. After irradiation, the light was turned off and the pressure was released carefully. The organic phase was removed under reduced pressure and the crude products were purified by column chromatography on silica gel (eluent: pentane/ethyl acetate = 40:1 to pentane/ethyl acetate/ dichloromethane = 1:1:1).

*Notably: the substrate expansion reactions were performed on a 0.4 mmol scale unless otherwise noted.*

2 mmol scale: To a screw-cap vial (15 ml) equipped with a septum, a small cannula, and a stirring bar was added  $\text{Cu}(\text{OTf})_2$  (3.6 mg, 0.5 mol%), bpy (3.2 mg, 1 mol%),  $\text{K}_2\text{CO}_3$  (552.8 mg, 4 mmol, 2.0 equiv.), and NuH (2.0 mmol, if the nucleophile is solid). The vials then were purged with argon three times before added dry MeCN (10 mL),  $\text{CCl}_4$  (1.0 mL, 10 mmol, 5.0 equiv.), and NuH (2.0 mmol, if the nucleophile is liquid). These vials were transferred into a 500 mL photoautoclav. The closed autoclave was flushed one time with nitrogen (~ 5 bar), two times with CO (~ 5 bar), and a pressure of ethylene (1 bar) and CO (50 bar) were charged. The autoclave was then placed on a magnetic stirrer. The reaction mixture was stirred while being irradiated with 40 W blue light (Kessil PR160L-456 nm, intensity = 50) at room temperature (25-30 °C) for 30 h. After irradiation, the light was turned off and the pressure was released carefully. The organic phase was removed under reduced pressure and the crude products were purified by column chromatography on silica gel (eluent: pentane/ethyl acetate = 30:1 to pentane/ethyl acetate/ dichloromethane = 10:1:1).

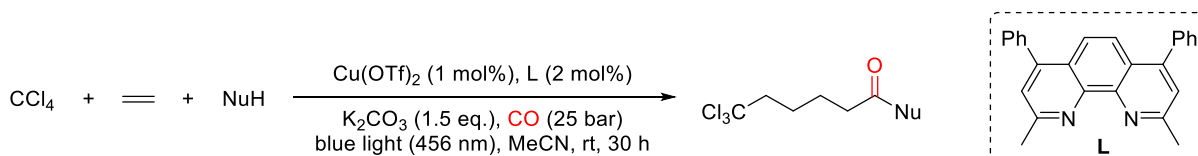

To each screw-cap vial (4 ml) equipped with a septum, a small cannula, and a stirring bar was added  $\text{Cu}(\text{OTf})_2$  (1.5 mg, 1 mol%), L (3.0 mg, 2 mol%),  $\text{K}_2\text{CO}_3$  (82.9 mg, 0.6 mmol, 1.5 equiv.), and NuH (0.4 mmol, if the nucleophile is solid). The vials then were purged with argon three times before added dry MeCN (2 mL),  $\text{CCl}_4$  (100  $\mu\text{L}$ , 1 mmol, 2.5 equiv.), and NuH (0.4 mmol, if the nucleophile is liquid). These vials were transferred into

a 500 mL photoautoclav. The closed autoclave was flushed one time with nitrogen (~ 5 bar), two times with CO (~ 5 bar), and a pressure of ethylene (35 bar) and CO (25 bar) were charged. The autoclave was then placed on a magnetic stirrer. The reaction mixture was stirred while being irradiated with 40 w blue light (Kessil PR160L-456 nm, intensity = 50) at room temperature (25-30 °C) for 24 h. After irradiation, the light was turned off and the pressure was released carefully. The organic phase was removed under reduced pressure and the crude products were purified by column chromatography on silica gel (eluent: pentane/ethyl acetate = 40:1 to pentane/ethyl acetate/ dichloromethane = 6:1:1).

## 2.2 Supplementary Tables

Table S1. Screening of catalyst and base<sup>a</sup>

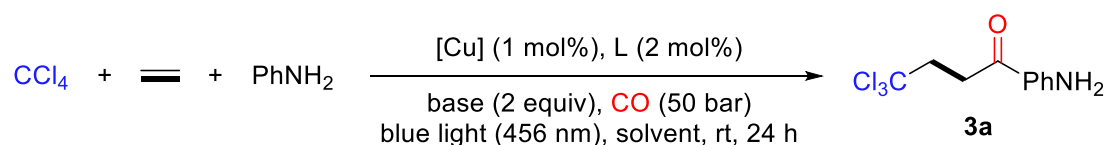

| Entry          | Catalyst             | Ligand              | Base                            | Solvent           | Yield (%) <sup>a</sup> |
|----------------|----------------------|---------------------|---------------------------------|-------------------|------------------------|
| 1 <sup>c</sup> | Cu(OTf) <sub>2</sub> | BINAP               | K <sub>2</sub> CO <sub>3</sub>  | MeCN              | 44                     |
| 2 <sup>c</sup> | Cu(OTf) <sub>2</sub> | 1,10-Phen           | K <sub>2</sub> CO <sub>3</sub>  | MeCN              | 55                     |
| 3              | Cu(OTf) <sub>2</sub> | 1,10-Phen           | K <sub>2</sub> CO <sub>3</sub>  | MeCN              | 78                     |
| 4              | Cu(OTf) <sub>2</sub> | bpy                 | K <sub>2</sub> CO <sub>3</sub>  | MeCN              | 80 (77) <sup>b</sup>   |
| 5              | Cu(OTf) <sub>2</sub> | 4,4'-diOMe-2,2'-bpy | K <sub>2</sub> CO <sub>3</sub>  | MeCN              | 76                     |
| 6              | Cu(OTf) <sub>2</sub> | 6,6'-diMe-2,2'-bpy  | K <sub>2</sub> CO <sub>3</sub>  | MeCN              | 60                     |
| 7              | Cu(OTf) <sub>2</sub> | 2,9-diMe-1,10-Phen  | K <sub>2</sub> CO <sub>3</sub>  | MeCN              | 43                     |
| 8              | Cu(OAc) <sub>2</sub> | bpy                 | K <sub>2</sub> CO <sub>3</sub>  | MeCN              | 75                     |
| 9              | CuI                  | bpy                 | K <sub>2</sub> CO <sub>3</sub>  | MeCN              | 76                     |
| 10             | Cu(OTf) <sub>2</sub> | bpy                 | Na <sub>2</sub> CO <sub>3</sub> | MeCN              | 79                     |
| 11             | Cu(OTf) <sub>2</sub> | bpy                 | K <sub>3</sub> PO <sub>4</sub>  | MeCN              | 76                     |
| 12             | Cu(OTf) <sub>2</sub> | bpy                 | Et <sub>3</sub> N               | MeCN              | 22                     |
| 13             | Cu(OTf) <sub>2</sub> | bpy                 | K <sub>2</sub> CO <sub>3</sub>  | PhCF <sub>3</sub> | 53                     |
| 14             | Cu(OTf) <sub>2</sub> | bpy                 | K <sub>2</sub> CO <sub>3</sub>  | 1,4-dioxane       | 65                     |
| 15             | Cu(OTf) <sub>2</sub> | bpy                 | K <sub>2</sub> CO <sub>3</sub>  | DCE               | 57                     |

[a] Reaction conditions: CCl<sub>4</sub> (1.0 mmol), ethylene (1 bar), PhNH<sub>2</sub> (0.2 mmol), [Cu] (1 mol%), Ligand (2 mol%), and Base (2.0 equiv.) in solvent (1.0 mL) at rt (25-30 °C) for 24 h under CO (50 bar). Yields were determined by GC-FID analysis using n-hexadecane as internal standard. [b] Yield of isolated product. [c] CO (40 bar).

Table S2. Optimization of reaction conditions<sup>a</sup>

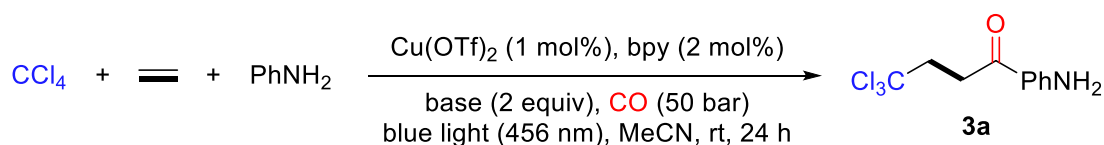

| Entry | Variations from the standard conditions                                           | Yield (%) <sup>a</sup> |
|-------|-----------------------------------------------------------------------------------|------------------------|
| 1     | 0.5 mmol of CCl <sub>4</sub> added                                                | 74                     |
| 2     | Cu(OTf) <sub>2</sub> (2.5 mol%), bpy (5 mol%) added                               | 76                     |
| 3     | 1.5 equiv of K <sub>2</sub> CO <sub>3</sub> added                                 | 78                     |
| 4     | 1.2 equiv of K <sub>2</sub> CO <sub>3</sub> added                                 | 76                     |
| 5     | no bpy                                                                            | 24                     |
| 6     | no Cu(OTf) <sub>2</sub> , no K <sub>2</sub> CO <sub>3</sub> , or no light         | n.r.                   |
| 7     | [Cu(dmp) <sub>2</sub> ]Cl instead of Cu(OTf) <sub>2</sub> and bpy                 | 66                     |
| 8     | [Cu(dmp) <sub>2</sub> Cl]Cl instead of Cu(OTf) <sub>2</sub> and bpy               | 62                     |
| 9     | [Cu(dmp)XantPhos]PF <sub>6</sub> instead of Cu(OTf) <sub>2</sub> and bpy          | 50                     |
| 10    | [Cu(bpy) <sub>2</sub> ](OTf) <sub>2</sub> instead of Cu(OTf) <sub>2</sub> and bpy | 70                     |
| 11    | no light, 40 °C                                                                   | 56                     |
| 12    | no light, 80 °C                                                                   | 76                     |

[a] Reaction conditions: CCl<sub>4</sub> (1.0 mmol), ethylene (1 bar), PhNH<sub>2</sub> (0.2 mmol), Cu(OTf)<sub>2</sub> (1 mol%), bpy (2 mol%), and K<sub>2</sub>CO<sub>3</sub> (2.0 equiv.) in MeCN (1.0 mL) at rt (25-30 °C) for 24 h under CO (50 bar). Yields were determined by GC-FID analysis using n-hexadecane as internal standard.

Table S3. Optimization of reaction conditions<sup>a</sup>

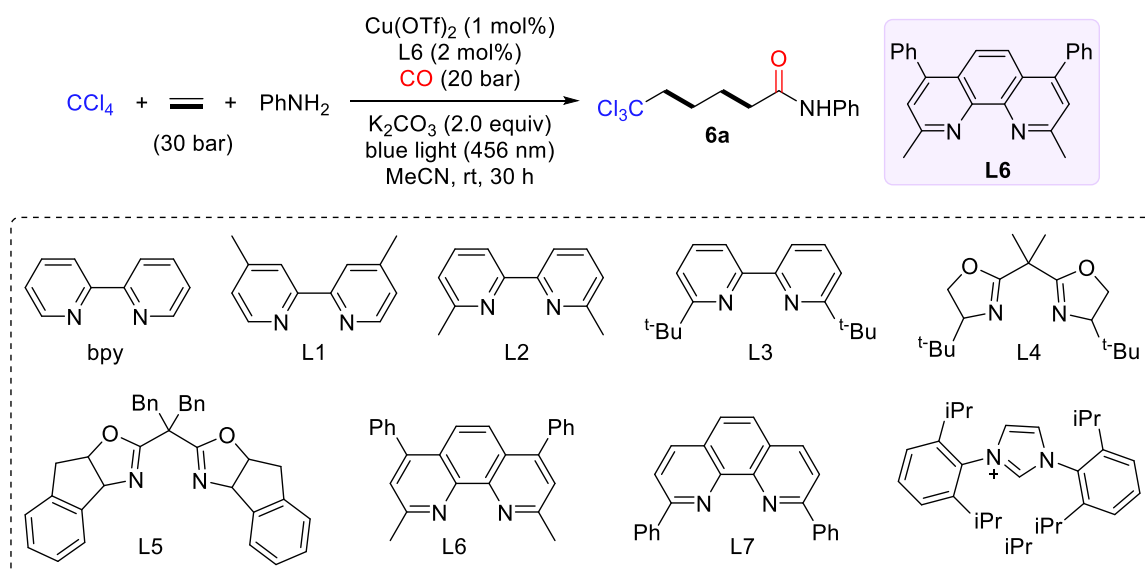

| Entry | Variations from the standard conditions | Yield (%) <sup>a</sup> |
|-------|-----------------------------------------|------------------------|
| 1     | none                                    | 36                     |
| 2     | Bpy instead of L6                       | 22                     |
| 3     | L1 instead of L6                        | 21                     |

|   |                                                |    |
|---|------------------------------------------------|----|
| 4 | L2 instead of L6                               | 22 |
| 5 | L3 instead of L6                               | 27 |
| 6 | L4 instead of L6                               | 32 |
| 7 | L5 instead of L6                               | 35 |
| 8 | L7 instead of L6                               | 37 |
| 9 | iPrCuCl instead of Cu(OTf) <sub>2</sub> and L6 | 34 |

[a] Reaction conditions: CCl<sub>4</sub> (1.0 mmol), ethylene (30 bar), PhNH<sub>2</sub> (0.2 mmol), Cu(OTf)<sub>2</sub> (1 mol%), bpy (2 mol%), and K<sub>2</sub>CO<sub>3</sub> (2.0 equiv.) in MeCN (1.0 mL) at rt (25-30 °C) for 24 h under CO (20 bar). Yields were determined by GC-FID analysis using n-hexadecane as internal standard.

Table S4. Optimization of reaction conditions<sup>a</sup>

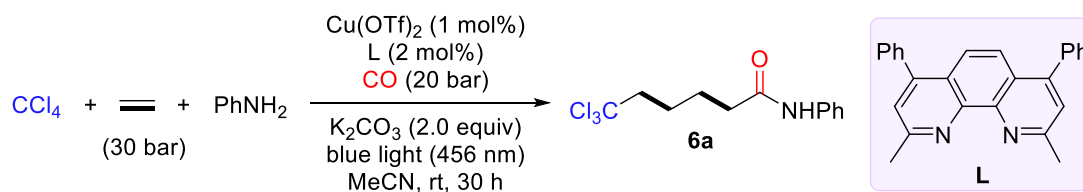

| Entry          | Variations from the standard conditions | Yield (%) <sup>a</sup> |
|----------------|-----------------------------------------|------------------------|
| 1              | ethylene = (30 bar), CO (10 bar)        | 25                     |
| 2              | ethylene = (30 bar), CO (15 bar)        | 32                     |
| 3              | ethylene = (30 bar), CO (30 bar)        | 27                     |
| 4              | ethylene = (35 bar), CO (30 bar)        | 23                     |
| 5              | ethylene = (40 bar), CO (30 bar)        | 18                     |
| 6 <sup>c</sup> | ethylene = (30 bar), CO (20 bar)        | 39                     |
| 7 <sup>c</sup> | 0.5 mmol of CCl <sub>4</sub> added      | 43 (41) <sup>b</sup>   |
| 8 <sup>c</sup> | 0.4 mmol of CCl <sub>4</sub> added      | 40                     |
| 9 <sup>c</sup> | 0.6 mmol of CCl <sub>4</sub> added      | 42                     |

[a] Reaction conditions: CCl<sub>4</sub> (1.0 mmol), ethylene (30 bar), PhNH<sub>2</sub> (0.2 mmol), Cu(OTf)<sub>2</sub> (1 mol%), bpy (2 mol%), and K<sub>2</sub>CO<sub>3</sub> (2.0 equiv.) in MeCN (1.0 mL) at rt (25-30 °C) for 24 h under CO (20 bar). Yields were determined by GC-FID analysis using n-hexadecane as internal standard. [b] Yield of isolated product.

### 3. Analytical data

#### 4,4,4-Trichloro-*N*-phenylbutanamide (**3a**)

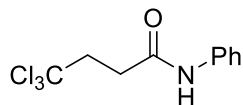

79.9 mg, light yellow solid, yield: 75%. Eluent: pentane/ethyl acetate/dichloromethane = 10/1/1.

**<sup>1</sup>H NMR** (400 MHz, CDCl<sub>3</sub>) δ 7.49 (d, *J* = 7.7 Hz, 2H), 7.45 (s, 1H), 7.32 (t, *J* = 7.9 Hz, 2H), 7.13 (t, *J* = 7.4 Hz, 1H), 3.31 – 3.03 (m, 2H), 2.95 – 2.70 (m, 2H).

**<sup>13</sup>C NMR** (101 MHz, CDCl<sub>3</sub>) δ 168.1, 137.4, 129.1, 124.7, 120.0, 98.9, 50.1, 34.3.

**HR-MS** (ESI-TOF) *m/z*: [M+H]<sup>+</sup> calcd. for C<sub>10</sub>H<sub>11</sub>Cl<sub>3</sub>NO 265.9901, found 265.9902.

#### 4,4,4-Trichloro-*N*-(2-isopropylphenyl)butanamide (**3b**)

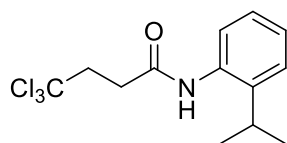

41.1 mg, light yellow solid, yield: 66%. Eluent: pentane/ethyl acetate/dichloromethane = 10/1/1.

**<sup>1</sup>H NMR** (400 MHz, CDCl<sub>3</sub>) δ 7.68 (s, 1H), 7.39 (d, *J* = 8.4 Hz, 1H), 7.26 (d, *J* = 8.1 Hz, 1H), 7.17 (t, *J* = 6.8 Hz, 1H), 7.11 (t, *J* = 7.6 Hz, 1H), 3.14 – 3.07 (m, 2H), 3.08-2.96 (m, 1H), 2.87 – 2.76 (m, 2H), 1.18 (d, *J* = 6.9 Hz, 6H).

**<sup>13</sup>C NMR** (101 MHz, CDCl<sub>3</sub>) δ 169.0, 141.8, 133.4, 126.7, 126.2, 125.73, 125.67, 99.0, 50.2, 33.6, 27.8, 23.1.

**HR-MS** (ESI-TOF) *m/z*: [M+H]<sup>+</sup> calcd. for C<sub>13</sub>H<sub>17</sub>Cl<sub>3</sub>NO 308.0370, found 308.0375.

#### 4,4,4-Trichloro-*N*-(3-(trifluoromethyl)phenyl)butanamide (**3c**)

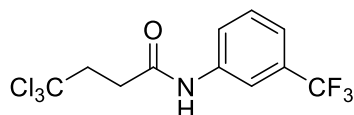

121.7 mg, light yellow solid, yield: 90%. Eluent: pentane/ethyl acetate/dichloromethane = 10/1/1.

**<sup>1</sup>H NMR** (400 MHz, CD<sub>3</sub>OD) δ 8.01 (t, *J* = 2.1 Hz, 1H), 7.74 (dt, *J* = 8.2, 1.4 Hz, 1H), 7.46 (t, *J* = 8.0 Hz, 1H), 7.34 (d, *J* = 8.0 Hz, 1H), 4.87 (s, 1H), 3.18 – 3.10 (m, 2H), 2.94 – 2.87 (m, 2H).

**<sup>13</sup>C NMR** (101 MHz, CD<sub>3</sub>OD) δ 171.2, 140.6, 132.1 (q, *J* = 32.2 Hz), 130.6, 125.43 (q, *J* = 271.4 Hz), 124.0, 121.3 (q, *J* = 4.1 Hz), 117.3 (q, *J* = 4.2 Hz), 100.4, 51.2, 34.7.

**<sup>19</sup>F NMR** (376 MHz, CD<sub>3</sub>OD) δ -64.2.

**HR-MS** (ESI-TOF) *m/z*: [M+H]<sup>+</sup> calcd. for C<sub>11</sub>H<sub>10</sub>Cl<sub>3</sub>F<sub>3</sub>NO 333.9775, found 333.9781.

#### 4,4,4-Trichloro-*N*-(3-methoxyphenyl)butanamide (**3d**)

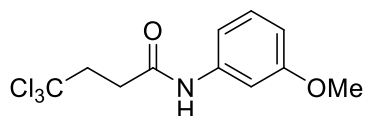

71.7 mg, light yellow oil, yield: 60%. Eluent: pentane/ethyl acetate/dichloromethane = 10/1/1 to 6/1/1.

**<sup>1</sup>H NMR** (400 MHz, CDCl<sub>3</sub>) δ 7.95 (s, 1H), 7.23 (t, *J* = 2.3 Hz, 1H), 7.18 (t, *J* = 8.2 Hz, 1H), 6.97 (dd, *J* = 7.9, 2.0 Hz, 1H), 6.66 (dd, *J* = 8.3, 2.5 Hz, 1H), 3.75 (s, 3H), 3.17 – 3.09 (m, 2H), 2.86 – 2.78 (m, 2H).

**<sup>13</sup>C NMR** (101 MHz, CDCl<sub>3</sub>) δ 168.5, 160.0, 138.6, 129.7, 112.3, 110.3, 106.1, 98.9, 55.2, 50.0, 34.1.

**HR-MS** (ESI-TOF)  $m/z$ :  $[M+H]^+$  calcd. for  $C_{11}H_{13}Cl_3NO_2$  296.0006, found 293.0009.

4,4,4-Trichloro-*N*-(4-(trifluoromethyl)phenyl)butanamide (**3e**)

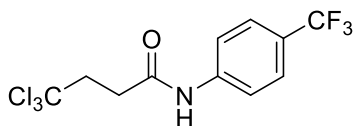

110.8 mg, light yellow solid, yield: 83%. Eluent: pentane/ethyl acetate/dichloromethane = 10/1/1.

**$^1H$  NMR** (400 MHz,  $DMSO-d_6$ )  $\delta$  10.49 (s, 1H), 7.80 (d,  $J = 8.5$  Hz, 2H), 7.64 (d,  $J = 8.6$  Hz, 2H), 3.20 – 3.07 (m, 2H), 2.93 – 2.77 (m, 2H).

**$^{13}C$  NMR** (101 MHz,  $DMSO-d_6$ )  $\delta$  168.9, 142.5, 126.0 (q,  $J = 3.8$  Hz), 124.3 (q,  $J = 271.2$  Hz), 123.3 (q,  $J = 32.0$  Hz), 118.9, 99.7, 49.4, 33.5.

**$^{19}F$  NMR** (376 MHz,  $DMSO-d_6$ )  $\delta$  -60.5.

**HR-MS** (ESI-TOF)  $m/z$ :  $[M+H]^+$  calcd. for  $C_{11}H_{10}Cl_3F_3NO$  333.9775, found 333.9776.

4,4,4-Trichloro-*N*-(4-(trifluoromethoxy)phenyl)butanamide (**3f**)

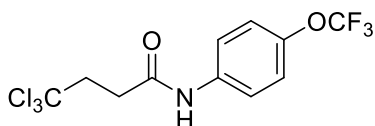

120.3 mg, light yellow solid, yield: 86%. Eluent: pentane/ethyl acetate/dichloromethane = 10/1/1.

**$^1H$  NMR** (400 MHz,  $CDCl_3$ )  $\delta$  8.29 (s, 1H), 7.48 (d,  $J = 9.0$  Hz, 2H), 7.12 (d,  $J = 8.6$  Hz, 2H), 3.20 – 3.01 (m, 2H), 2.95 – 2.78 (m, 2H).

**$^{13}C$  NMR** (101 MHz,  $CDCl_3$ )  $\delta$  169.0, 145.6 (q,  $J = 2.1$  Hz), 135.9, 121.7, 120.4 (q,  $J = 257.9$  Hz), 98.7, 50.0, 34.0.

**$^{19}F$  NMR** (376 MHz,  $CDCl_3$ )  $\delta$  -58.2.

**HR-MS** (ESI-TOF)  $m/z$ :  $[M+H]^+$  calcd. for  $C_{11}H_{10}Cl_3F_3NO_2$  349.9724, found 349.9724.

4,4,4-Trichloro-*N*-(4-bromophenyl)butanamide (**3g**)

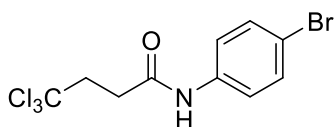

106.7 mg, light yellow solid, yield: 77%. Eluent: pentane/ethyl acetate/dichloromethane = 10/1/1.

**$^1H$  NMR** (400 MHz,  $DMSO-d_6$ )  $\delta$  10.26 (s, 1H), 7.57 (d,  $J = 8.9$  Hz, 2H), 7.46 (d,  $J = 8.8$  Hz, 2H), 3.18 – 3.05 (m, 2H), 2.89 – 2.73 (m, 2H).

**$^{13}C$  NMR** (101 MHz,  $DMSO-d_6$ )  $\delta$  168.3, 138.3, 131.5, 120.9, 114.8, 99.7, 49.5, 33.4.

**HR-MS** (ESI-TOF)  $m/z$ :  $[M+H]^+$  calcd. for  $C_{10}H_{10}BrCl_3NO$  343.9006, found 343.9004.

4,4,4-Trichloro-*N*-(4-iodophenyl)butanamide (**3h**)

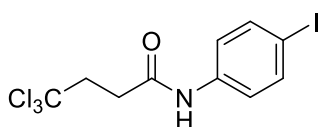

128.2 mg, light yellow solid, yield: 82%. Eluent: pentane/ethyl acetate/dichloromethane = 10/1/1.



**<sup>1</sup>H NMR** (400 MHz, DMSO-*d*<sub>6</sub>) δ 10.23 (s, 1H), 7.62 (d, *J* = 8.7 Hz, 2H), 7.43 (d, *J* = 8.8 Hz, 2H), 3.18 – 3.02 (m, 2H), 2.88 – 2.72 (m, 2H).

**<sup>13</sup>C NMR** (101 MHz, DMSO-*d*<sub>6</sub>) δ 168.3, 138.8, 137.3, 121.2, 99.7, 86.6, 49.5, 33.4.

**HR-MS** (ESI-TOF) *m/z*: [M+H]<sup>+</sup> calcd. for C<sub>10</sub>H<sub>10</sub>ICl<sub>3</sub>NO 391.8867, found 391.8871.

4,4,4-Trichloro-*N*-(4-(methylthio)phenyl)butanamide (**3i**)

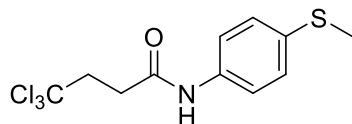

84.5 mg, light yellow solid, yield: 68%. Eluent: pentane/ethyl acetate/dichloromethane = 8/1/1.

**<sup>1</sup>H NMR** (400 MHz, CDCl<sub>3</sub>) δ 8.00 (s, 1H), 7.37 (d, *J* = 8.5 Hz, 2H), 7.17 (d, *J* = 8.6 Hz, 2H), 3.16 – 3.05 (m, 2H), 2.85 – 2.76 (m, 2H), 2.43 (s, 3H).

**<sup>13</sup>C NMR** (101 MHz, CDCl<sub>3</sub>) δ 168.5, 134.8, 134.2, 127.6, 121.0, 98.8, 50.0, 34.0, 16.4.

**HR-MS** (ESI-TOF) *m/z*: [M+H]<sup>+</sup> calcd. for C<sub>11</sub>H<sub>13</sub>Cl<sub>3</sub>NOS 311.9778, found 311.9785.

4,4,4-Trichloro-*N*-(4-phenoxyphenyl)butanamide (**3j**)

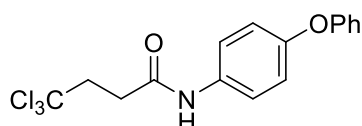

91.1 mg, light yellow oil, yield: 64%. Eluent: pentane/ethyl acetate/dichloromethane = 10/1/1 to 8/1/1.

**<sup>1</sup>H NMR** (400 MHz, CDCl<sub>3</sub>) δ 8.01 (s, 1H), 7.43 (d, *J* = 8.9 Hz, 2H), 7.32 (dd, *J* = 8.6, 7.3 Hz, 2H), 7.09 (t, *J* = 7.4 Hz, 1H), 7.00 – 6.91 (m, 4H), 3.19 – 3.11 (m, 2H), 2.88 – 2.79 (m, 2H).

**<sup>13</sup>C NMR** (101 MHz, CDCl<sub>3</sub>) δ 168.5, 157.2, 153.9, 132.8, 129.7, 123.2, 122.1, 119.4, 118.5, 98.9, 50.1, 34.0.

**HR-MS** (ESI-TOF) *m/z*: [M+H]<sup>+</sup> calcd. for C<sub>16</sub>H<sub>15</sub>Cl<sub>3</sub>NO<sub>2</sub> 358.0163, found 358.0171.

4,4,4-Trichloro-*N*-(4-acetylphenyl)butanamide (**3k**)

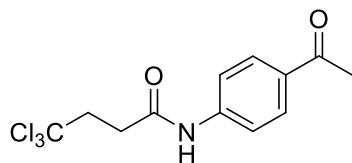

52.5 mg, light yellow solid, yield: 43%, 95% purity. Eluent: pentane/ethyl acetate/dichloromethane = 10/1/1 to 6/1/1.

**<sup>1</sup>H NMR** (400 MHz, DMSO-*d*<sub>6</sub>) δ 10.47 (s, 1H), 7.92 (d, *J* = 8.6 Hz, 2H), 7.72 (d, *J* = 8.8 Hz, 1H), 3.18 – 3.07 (m, 2H), 2.97 – 2.80 (m, 2H), 2.52 (s, 3H).

**<sup>13</sup>C NMR** (1101 MHz, DMSO-*d*<sub>6</sub>) δ 196.4, 168.8, 143.3, 131.7, 129.5, 118.3, 99.7, 49.4, 33.5, 26.4.

**HR-MS** (ESI-TOF) *m/z*: [M+H]<sup>+</sup> calcd. for C<sub>12</sub>H<sub>13</sub>Cl<sub>3</sub>NO<sub>2</sub> 308.0006, found 308.0008.

4,4,4-Trichloro-*N*-(4-cyanophenyl)butanamide (**3l**)

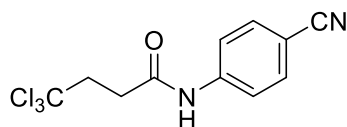

81.2 mg, light yellow solid, yield: 70%. Eluent: pentane/ethyl acetate/dichloromethane = 10/1/1 to 6/1/1.

**<sup>1</sup>H NMR** (400 MHz, DMSO-*d*<sub>6</sub>) δ 10.55 (s, 1H), 7.85 – 7.66 (m, 4H), 3.19 – 3.05 (m, 2H), 2.91 – 2.75 (m, 2H).

**<sup>13</sup>C NMR** (101 MHz, DMSO-*d*<sub>6</sub>) δ 169.1, 143.1, 133.2, 119.0, 119.0, 105.0, 99.6, 49.3, 33.5.

**HR-MS** (ESI-TOF) *m/z*: [M+H]<sup>+</sup> calcd. for C<sub>11</sub>H<sub>10</sub>Cl<sub>3</sub>N<sub>2</sub>O 290.9853, found 290.9853.

4,4,4-Trichloro-*N*-(4-acetamidophenyl)butanamide (**3m**)

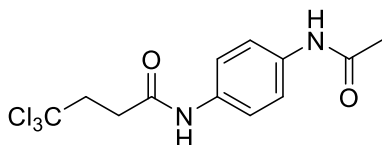

32.6 mg, light yellow solid, yield: 25%. Eluent: pentane/ethyl acetate/dichloromethane = 1/1/1 to 1/2/1.

**<sup>1</sup>H NMR** (400 MHz, DMSO-*d*<sub>6</sub>) δ 10.06 (s, 1H), 9.86 (s, 1H), 7.59 – 7.37 (m, 4H), 3.19 – 3.00 (m, 2H), 2.84 – 2.71 (m, 2H), 2.01 (s, 3H).

**<sup>13</sup>C NMR** (101 MHz, DMSO-*d*<sub>6</sub>) δ 167.9, 167.8, 134.8, 134.3, 119.5, 119.4, 99.8, 49.7, 33.2, 23.9.

**HR-MS** (ESI-TOF) *m/z*: [M+H]<sup>+</sup> calcd. for C<sub>12</sub>H<sub>14</sub>Cl<sub>3</sub>N<sub>2</sub>O<sub>2</sub> 323.0115, found 323.0120.

4,4,4-Trichloro-*N*-(pyridin-2-yl)butanamide (**3n**)

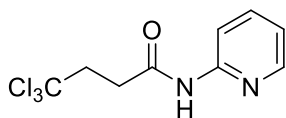

71.5 mg, light yellow solid, yield: 67%, 95% purity. Eluent: pentane/ethyl acetate/dichloromethane = 5/1/1 to 3/1/1.

**<sup>1</sup>H NMR** (400 MHz, CDCl<sub>3</sub>) δ 9.98 (s, 1H), 8.31 (dd, *J* = 4.9, 1.8 Hz, 1H), 8.22 (d, *J* = 8.4 Hz, 1H), 7.72 (td, *J* = 8.4, 7.9, 1.9 Hz, 1H), 7.06 (dd, *J* = 7.4, 5.0 Hz, 1H), 3.29 – 3.05 (m, 2H), 2.99 – 2.76 (m, 2H).

**<sup>13</sup>C NMR** (101 MHz, CDCl<sub>3</sub>) δ 168.9, 151.7, 147.4, 138.8, 119.9, 114.8, 98.8, 49.7, 34.0.

**HR-MS** (ESI-TOF) *m/z*: [M+H]<sup>+</sup> calcd. for C<sub>9</sub>H<sub>10</sub>Cl<sub>3</sub>N<sub>2</sub>O 266.9853, found 266.9860.

4,4,4-Trichloro-*N*-(pyridin-3-yl)butanamide (**3o**)

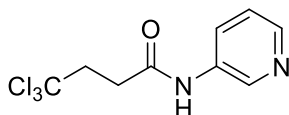

50.8 mg, light yellow solid, yield: 47%. Eluent: pentane/ethyl acetate/dichloromethane = 1/1/1 to 1/2/1.

**<sup>1</sup>H NMR** (400 MHz, CDCl<sub>3</sub>) δ 9.47 (s, 1H), 8.64 (d, *J* = 2.6 Hz, 1H), 8.33 (dd, *J* = 4.8, 1.5 Hz, 1H), 8.18 (dt, *J* = 8.4, 2.0 Hz, 1H), 7.30 (dd, *J* = 8.4, 4.8 Hz, 1H), 3.24 – 3.09 (m, 2H), 2.97 – 2.82 (m, 2H).

**<sup>13</sup>C NMR** (101 MHz, CDCl<sub>3</sub>) δ 169.3, 144.7, 140.8, 135.4, 127.8, 124.1, 98.8, 49.9, 33.9.

**HR-MS** (ESI-TOF) *m/z*: [M+H]<sup>+</sup> calcd. for C<sub>9</sub>H<sub>10</sub>Cl<sub>3</sub>N<sub>2</sub>O 266.9853, found 266.9859.

4,4,4-Trichloro-*N*-methyl-*N*-phenylbutanamide (**3p**)

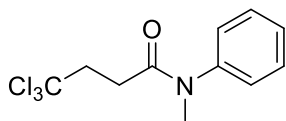

64.5 mg, light yellow oil, yield: 57%. Eluent: pentane/ethyl acetate/dichloromethane = 10/1/1.

**<sup>1</sup>H NMR** (400 MHz, CDCl<sub>3</sub>) δ 7.43 (t, *J* = 7.6 Hz, 2H), 7.35 (t, *J* = 7.4 Hz, 1H), 7.23 – 7.13 (m, 2H), 3.26 (s, 3H), 3.14 – 2.97 (m, 2H), 2.58 – 2.44 (m, 2H).

**<sup>13</sup>C NMR** (101 MHz, CDCl<sub>3</sub>) δ 169.9, 143.3, 129.9, 128.1, 127.1, 99.0, 50.5, 37.4, 31.3.

**HR-MS** (ESI-TOF) m/z: [M+H]<sup>+</sup> calcd. for C<sub>11</sub>H<sub>13</sub>Cl<sub>3</sub>NO 280.0057, found 280.0063.

4,4,4-Trichloro-1-(indolin-1-yl)butan-1-one (**3q**)

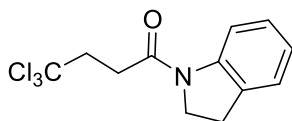

30.7 mg, light yellow solid, yield: 26%, 95% purity. Eluent: pentane/ethyl acetate/dichloromethane = 15/1/1.

**<sup>1</sup>H NMR** (400 MHz, CDCl<sub>3</sub>) δ 8.20 (d, *J* = 8.0 Hz, 1H), 7.21 (t, *J* = 7.9 Hz, 2H), 7.04 (t, *J* = 7.7 Hz, 1H), 4.11 (t, *J* = 8.5 Hz, 2H), 3.28 – 3.13 (m, 4H), 2.95 – 2.82 (m, 2H).

**<sup>13</sup>C NMR** (101 MHz, CDCl<sub>3</sub>) δ 167.9, 142.7, 131.0, 127.6, 124.6, 123.9, 116.9, 99.2, 49.8, 47.9, 33.0, 28.0.

**HR-MS** (ESI-TOF) m/z: [M+Na]<sup>+</sup> calcd. for C<sub>12</sub>H<sub>13</sub>Cl<sub>3</sub>NO 292.0057, found 292.0061.

4,4,4-Trichloro-*N*-benzylbutanamide (**3r**)

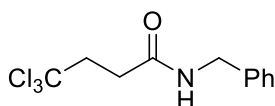

43.3 mg, light yellow oil, yield: 39%. Eluent: pentane/ethyl acetate/dichloromethane = 10/1/1 to 5/1/1.

**<sup>1</sup>H NMR** (400 MHz, CDCl<sub>3</sub>) δ 7.34 – 7.24 (m, 3H), 7.24 – 7.18 (m, 2H), 6.64 (t, *J* = 5.8 Hz, 1H), 4.35 (d, *J* = 5.7 Hz, 2H), 3.10 – 2.96 (m, 2H), 2.73 – 2.58 (m, 2H).

**<sup>13</sup>C NMR** (101 MHz, CDCl<sub>3</sub>) δ 169.9, 137.8, 128.6, 127.6, 127.5, 99.0, 50.2, 43.6, 33.0.

**HR-MS** (ESI-TOF) m/z: [M+H]<sup>+</sup> calcd. for C<sub>11</sub>H<sub>13</sub>Cl<sub>3</sub>NO 280.0057, found 280.0059.

4,4,4-Trichlorobutanamide (**3s**)

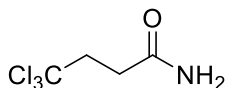

53.4 mg, colorless solid, yield: 70%, 95% purity. Eluent: pentane/ethyl acetate/dichloromethane = 1/1/1 to 1/2/1.

**<sup>1</sup>H NMR** (400 MHz, CDCl<sub>3</sub>) δ 6.45 (s, 1H), 6.17 (s, 1H), 3.10 – 2.91 (m, 2H), 2.77 – 2.60 (m, 2H).

**<sup>13</sup>C NMR** (101 MHz, CDCl<sub>3</sub>) δ 173.0, 98.8, 50.0, 32.4.

**HR-MS** (ESI-TOF) m/z: [M+H]<sup>+</sup> calcd. for C<sub>4</sub>H<sub>7</sub>Cl<sub>3</sub>NO 189.9588, found 189.9592.

4,4,4-Trichlorophenylbutanoate (**4a**)

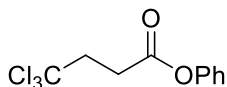

83.8 mg, light yellow oil, yield: 78%. Eluent: pentane/ethyl acetate = 30/1 to 20/1.

**<sup>1</sup>H NMR** (400 MHz, CDCl<sub>3</sub>) δ 7.45 – 7.32 (m, 2H), 7.30 – 7.18 (m, 1H), 7.14 – 7.04 (m, 2H), 3.23 – 3.12 (m, 2H), 3.12 – 3.03 (m, 2H).

**<sup>13</sup>C NMR** (101 MHz, CDCl<sub>3</sub>) δ 169.5, 150.4, 129.5, 126.0, 121.3, 98.3, 49.7, 31.6.

**HR-MS** (ESI-TOF) m/z: [M+H]<sup>+</sup> calcd. for C<sub>10</sub>H<sub>10</sub>Cl<sub>3</sub>O<sub>2</sub> 266.9741, found 266.9739.

4,4,4-Trichloro-2-isopropyl-4-methylphenylbutanoate (**4b**)

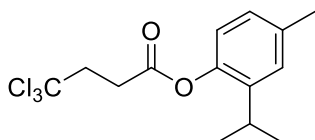

96.1 mg, light yellow oil, yield: 74%. Eluent: pentane/ethyl acetate = 50/1 to 30/1.

$^1\text{H NMR}$  (400 MHz,  $\text{CDCl}_3$ )  $\delta$  7.24 (d,  $J = 7.9$  Hz, 1H), 7.08 (d,  $J = 8.0$  Hz, 1H), 6.89 – 6.81 (m, 1H), 3.27 – 3.18 (m, 2H), 3.16 – 3.08 (m, 2H), 3.00 (p,  $J = 6.9$  Hz, 1H), 2.35 (s, 3H), 1.24 (d,  $J = 7.0$  Hz, 6H).

$^{13}\text{C NMR}$  (101 MHz,  $\text{CDCl}_3$ )  $\delta$  169.8, 147.6, 136.8, 136.6, 127.4, 126.5, 122.4, 98.4, 49.7, 31.4, 27.1, 23.0, 20.8.

**HR-MS** (ESI-TOF)  $m/z$ :  $[\text{M}+\text{H}]^+$  calcd. for  $\text{C}_{14}\text{H}_{18}\text{Cl}_3\text{O}_2$  323.0367, found 323.0369.

4,4,4-trichloro-4-acetamidophenylbutanoate (**4c**)

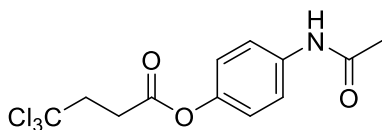

55.6 mg, light yellow solid, yield: 43%. Eluent: pentane/ethyl acetate/dichloromethane = 4/1/1 to 2/1/1.

$^1\text{H NMR}$  (400 MHz,  $\text{CDCl}_3$ )  $\delta$  8.07 (s, 1H), 7.48 (d,  $J = 8.9$  Hz, 2H), 6.99 (d,  $J = 8.9$  Hz, 2H), 3.24 – 3.11 (m, 2H), 3.10 – 3.00 (m, 2H), 2.11 (s, 3H).

$^{13}\text{C NMR}$  (101 MHz,  $\text{CDCl}_3$ )  $\delta$  169.9, 168.8, 146.4, 135.9, 121.6, 121.0, 98.3, 49.6, 31.5, 24.2.

**HR-MS** (ESI-TOF)  $m/z$ :  $[\text{M}+\text{H}]^+$  calcd. for  $\text{C}_{12}\text{H}_{13}\text{Cl}_3\text{NO}_3$  323.9956, found 323.9962.

4,4,4-trichloro-4-carbamoylphenylbutanoate (**4d**)

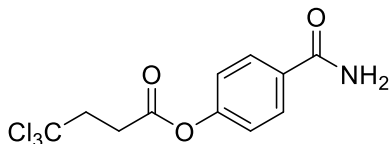

107.5 mg, light yellow solid, yield: 87%. Eluent: pentane/ethyl acetate/dichloromethane = 2/1/1 to 1/1/1.

$^1\text{H NMR}$  (400 MHz,  $\text{DMSO}-d_6$ )  $\delta$  8.02 (s, 1H), 7.95 (d,  $J = 8.7$  Hz, 2H), 7.41 (s, 1H), 7.25 (d,  $J = 8.6$  Hz, 2H), 3.25 – 3.16 (m, 2H), 3.11 – 3.00 (m, 2H).

$^{13}\text{C NMR}$  (101 MHz,  $\text{DMSO}-d_6$ )  $\delta$  169.3, 167.2, 152.5, 132.1, 129.0, 121.5, 99.0, 49.1, 31.2.

**HR-MS** (ESI-TOF)  $m/z$ :  $[\text{M}+\text{H}]^+$  calcd. for  $\text{C}_{11}\text{H}_{11}\text{Cl}_3\text{NO}_3$  309.9799, found 309.9805.

4,4,4-trichloro-4-formylphenylbutanoate (**4e**)

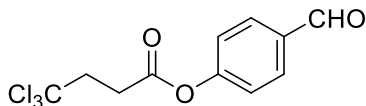

89.5 mg, light yellow oil, yield: 76%. Eluent: pentane/ethyl acetate = 20/1 to 10/1.

$^1\text{H NMR}$  (400 MHz,  $\text{CDCl}_3$ )  $\delta$  9.99 (s, 1H), 8.01 – 7.83 (m, 2H), 7.35 – 7.24 (m, 2H), 3.22 – 3.15 (m, 2H), 3.14 – 3.08 (m, 2H).

$^{13}\text{C NMR}$  (101 MHz,  $\text{CDCl}_3$ )  $\delta$  190.7, 168.9, 154.9, 134.1, 131.2, 122.1, 98.1, 49.4, 31.5.

**HR-MS** (ESI-TOF)  $m/z$ :  $[\text{M}+\text{H}]^+$  calcd. for  $\text{C}_{11}\text{H}_{10}\text{Cl}_3\text{O}_3$  294.9690, found 294.9695.

4,4,4-trichloro-4-nitrophenylbutanoate (**4f**)

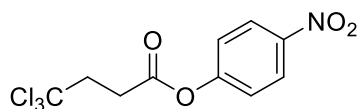

31.7 mg, light yellow oil, yield: 25%, 95% purity. Eluent: pentane/ethyl acetate = 15/1 to 10/1.

$^1\text{H NMR}$  (400 MHz,  $\text{CDCl}_3$ )  $\delta$  8.32 – 8.24 (m, 2H), 7.35 – 7.27 (m, 2H), 3.22 – 3.16 (m, 2H), 3.16 – 3.09 (m, 2H).

$^{13}\text{C NMR}$  (101 MHz,  $\text{CDCl}_3$ )  $\delta$  168.8, 155.0, 145.5, 125.3, 122.3, 98.0, 49.4, 31.5.

**HR-MS** (ESI-TOF)  $m/z$ :  $[\text{M}+\text{H}]^+$  calcd. for  $\text{C}_{10}\text{H}_9\text{Cl}_3\text{NO}_4$  311.9592, found 311.9598.

[1,1'-Biphenyl]-2,2'-diyl bis(4,4,4-trichlorobutanoate) (**4g**)

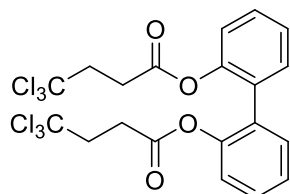

49.4 mg, light yellow oil, yield: 46% (0.2 mmol scale), 95% purity. Eluent: pentane/ethyl acetate = 20/1 to 10/1.

$^1\text{H NMR}$  (400 MHz,  $\text{CDCl}_3$ )  $\delta$  7.48 – 7.40 (m, 2H), 7.37 – 7.31 (m, 4H), 7.19 (d,  $J$  = 8.2 Hz, 2H), 2.88 – 2.82 (m, 4H), 2.81 – 2.74 (m, 4H).

$^{13}\text{C NMR}$  (101 MHz,  $\text{CDCl}_3$ )  $\delta$  169.3, 147.9, 131.3, 130.2, 129.3, 126.3, 122.3, 98.3, 49.4, 31.3.

**HR-MS** (ESI-TOF)  $m/z$ :  $[\text{M}+\text{H}]^+$  calcd. for  $\text{C}_{20}\text{H}_{17}\text{Cl}_6\text{O}_4$  530.9253, found 530.9249.

Propane-2,2-diylbis(4,1-phenylene) bis(4,4,4-trichlorobutanoate) (**4h**)

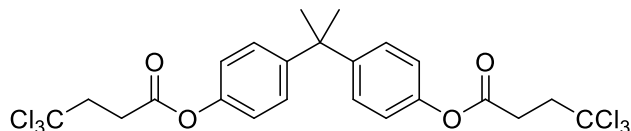

66.3 mg, colorless solid, yield: 58% (0.2 mmol scale). Eluent: pentane/ethyl acetate = 20/1 to 10/1.

$^1\text{H NMR}$  (400 MHz,  $\text{CDCl}_3$ )  $\delta$  7.27 – 7.19 (m, 4H), 7.05 – 6.94 (m, 4H), 3.21 – 3.12 (m, 4H), 3.10 – 3.01 (m, 4H), 1.67 (s, 6H).

$^{13}\text{C NMR}$  (101 MHz,  $\text{CDCl}_3$ )  $\delta$  169.6, 148.3, 148.0, 127.8, 120.7, 98.4, 49.7, 42.5, 31.6, 30.9.

**HR-MS** (ESI-TOF)  $m/z$ :  $[\text{M}+\text{H}]^+$  calcd. for  $\text{C}_{23}\text{H}_{23}\text{Cl}_6\text{O}_4$  572.9722, found 572.9724.

4-((4,4,4-Trichlorobutanoyl)oxy)benzyl 4,4,4-trichlorobutanoate (**4i**)

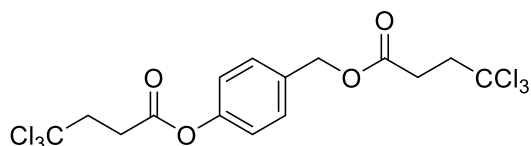

50.8 mg, light yellow oil, yield: 54% (0.2 mmol scale). Eluent: pentane/ethyl acetate = 20/1 to 10/1.

$^1\text{H NMR}$  (400 MHz,  $\text{CDCl}_3$ )  $\delta$  7.43 – 7.37 (m, 2H), 7.15 – 7.09 (m, 2H), 5.15 (s, 2H), 3.21 – 3.15 (m, 2H), 3.11 – 3.05 (m, 4H), 2.89 – 2.83 (m, 2H).

$^{13}\text{C NMR}$  (101 MHz,  $\text{CDCl}_3$ )  $\delta$  170.7, 169.5, 150.4, 133.3, 129.7, 121.6, 98.4, 98.3, 66.1, 49.7, 49.6, 31.5, 31.4.

**HR-MS** (ESI-TOF)  $m/z$ :  $[\text{M}+\text{NH}_4]^+$  calcd. for  $\text{C}_{15}\text{H}_{18}\text{Cl}_6\text{NO}_4$  485.9362, found 485.9359.

4,4,4-trichloro-4-(hydroxymethyl)phenylbutanoate (**4j**)

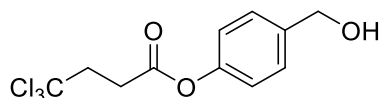

57.1 mg, light yellow oil, yield: 48% (and isolated **4i**, 30.1 mg, 16%). Eluent: pentane/ethyl acetate = 20/1 to 3/1.

**<sup>1</sup>H NMR** (400 MHz, CDCl<sub>3</sub>) δ 7.35 (d, *J* = 8.3 Hz, 2H), 7.07 (d, *J* = 8.4 Hz, 2H), 4.62 (s, 2H), 3.21 – 3.12 (m, 2H), 3.10 – 3.03 (m, 2H), 2.37 (s, 1H).

**<sup>13</sup>C NMR** (101 MHz, CDCl<sub>3</sub>) δ 169.7, 149.6, 138.8, 128.0, 121.3, 98.3, 64.4, 49.6, 31.5.

**HR-MS** (ESI-TOF) *m/z*: [M+H]<sup>+</sup> calcd. for C<sub>11</sub>H<sub>12</sub>Cl<sub>3</sub>O<sub>3</sub> 296.9847, found 296.9837.

4,4,4-Trichloro-3-phenylpropylbutanoate (**4k**)

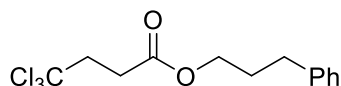

80.5 mg, light yellow oil, yield: 65%. Eluent: pentane/ethyl acetate = 30/1 to 20/1.

**<sup>1</sup>H NMR** (400 MHz, CDCl<sub>3</sub>) δ 7.34 – 7.28 (m, 2H), 7.25 – 7.17 (m, 3H), 4.17 (t, *J* = 6.5 Hz, 2H), 3.12 – 3.02 (m, 2H), 2.73 (t, *J* = 7.7 Hz, 2H), 2.76 – 2.69 (m, 2H), 2.07 – 1.95 (m, 2H).

**<sup>13</sup>C NMR** (101 MHz, CDCl<sub>3</sub>) δ 170.9, 140.9, 128.4, 128.3, 126.0, 98.6, 64.4, 49.8, 32.1, 31.4, 30.0.

**HR-MS** (ESI-TOF) *m/z*: [M+ NH<sub>4</sub>]<sup>+</sup> calcd. for C<sub>13</sub>H<sub>19</sub>Cl<sub>3</sub>NO<sub>2</sub> 326.0476, found 326.0470.

4,4,4-Trichloro-4-phenylbutylbutanoate (**4l**)

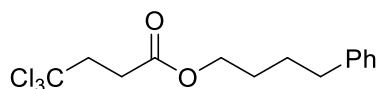

85.5 mg, light yellow oil, yield: 66%. Eluent: pentane/ethyl acetate = 30/1 to 20/1.

**<sup>1</sup>H NMR** (400 MHz, CDCl<sub>3</sub>) δ 7.35 – 7.27 (m, 2H), 7.25 – 7.13 (m, 3H), 4.21 – 4.09 (m, 2H), 3.13 – 3.03 (m, 2H), 2.85 – 2.78 (m, 2H), 2.71 – 2.61 (m, 2H), 1.77 – 1.65 (m, 4H).

**<sup>13</sup>C NMR** (101 MHz, CDCl<sub>3</sub>) δ 171.0, 141.8, 128.3, 125.8, 98.6, 64.9, 49.8, 35.4, 31.4, 28.1, 27.6.

**HR-MS** (ESI-TOF) *m/z*: [M+H]<sup>+</sup> calcd. for C<sub>14</sub>H<sub>18</sub>Cl<sub>3</sub>O<sub>2</sub> 323.0367, found 323.0366.

4,4,4-Trichloro-decylbutanoate (**4m**)

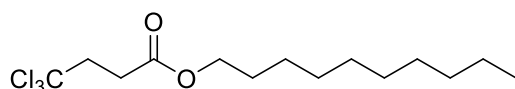

90.7 mg, light yellow oil, yield: 68%. Eluent: pentane/ethyl acetate = 30/1 to 20/1.

**<sup>1</sup>H NMR** (400 MHz, CDCl<sub>3</sub>) δ 4.10 (t, *J* = 6.8 Hz, 2H), 3.10 – 2.99 (m, 2H), 2.83 – 2.74 (m, 2H), 1.68 – 1.58 (m, 2H), 1.37 – 1.23 (m, 14H), 0.87 (t, *J* = 6.8 Hz, 3H).

**<sup>13</sup>C NMR** (101 MHz, CDCl<sub>3</sub>) δ 171.0, 98.6, 65.2, 49.9, 31.8, 31.5, 29.48, 29.46, 29.3, 29.2, 28.5, 25.8, 22.6, 14.1.

**HR-MS** (ESI-TOF) *m/z*: [M+H]<sup>+</sup> calcd. for C<sub>14</sub>H<sub>26</sub>Cl<sub>3</sub>O<sub>2</sub> 331.0993, found 331.0997.

4,4,4-Trichloro-6-bromohexylbutanoate (**4n**)

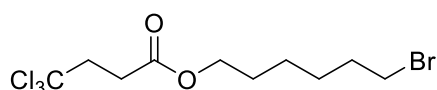

87.7 mg, light yellow oil, yield: 62%. Eluent: pentane/ethyl acetate = 30/1 to 20/1.

**<sup>1</sup>H NMR** (400 MHz, CDCl<sub>3</sub>) δ 4.10 (t, *J* = 6.7 Hz, 2H), 3.39 (t, *J* = 6.7 Hz, 2H), 3.08 – 2.99 (m, 2H), 2.82 – 2.73 (m, 2H), 1.85 (p, *J* = 6.9 Hz, 2H), 1.65 (p, *J* = 6.9 Hz, 2H), 1.52 – 1.42 (m, 2H), 1.42 – 1.32 (m, 2H).

**<sup>13</sup>C NMR** (101 MHz, CDCl<sub>3</sub>) δ 171.0, 98.5, 64.9, 49.8, 33.6, 32.5, 31.4, 28.3, 27.7, 25.0.

**HR-MS** (ESI-TOF) *m/z*: [M+H]<sup>+</sup> calcd. for C<sub>10</sub>H<sub>17</sub>BrCl<sub>3</sub>O<sub>2</sub> 352.9472, found 352.9475.

4,4,4-Trichloro-benzylbutanoate (**4o**)

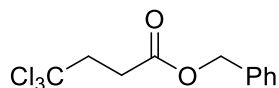

75.2 mg, light yellow oil, yield: 67%. Eluent: pentane/ethyl acetate = 30/1 to 20/1.

**<sup>1</sup>H NMR** (400 MHz, CDCl<sub>3</sub>) δ 7.45 – 7.30 (m, 5H), 5.18 (s, 2H), 3.18 – 3.05 (m, 2H), 2.95 – 2.79 (m, 2H).

**<sup>13</sup>C NMR** (101 MHz, CDCl<sub>3</sub>) δ 170.8, 135.4, 128.6, 128.4, 128.3, 98.5, 66.8, 49.8, 31.4.

**HR-MS** (ESI-TOF) *m/z*: [M+H]<sup>+</sup> calcd. for C<sub>11</sub>H<sub>12</sub>Cl<sub>3</sub>O<sub>2</sub> 280.9897, found 280.9896.

Thiophen-2-ylmethyl 4,4,4-trichlorobutanoate (**4p**)

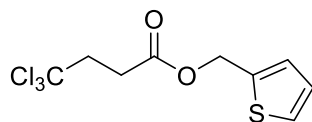

44.6 mg, light yellow oil, yield: 39%. Eluent: pentane/ethyl acetate = 30/1 to 20/1.

**<sup>1</sup>H NMR** (400 MHz, CDCl<sub>3</sub>) δ 7.34 (dd, *J* = 5.1, 1.2 Hz, 1H), 7.12 (d, *J* = 3.6 Hz, 1H), 7.00 (dd, *J* = 5.1, 3.5 Hz, 1H), 5.32 (s, 2H), 3.11 – 3.04 (m, 2H), 2.88 – 2.81 (m, 2H).

**<sup>13</sup>C NMR** (101 MHz, CDCl<sub>3</sub>) δ 170.7, 137.3, 128.5, 127.1, 126.9, 98.4, 61.0, 49.7, 31.4.

**HR-MS** (ESI-TOF) *m/z*: [M+H]<sup>+</sup> calcd. for C<sub>9</sub>H<sub>10</sub>Cl<sub>3</sub>O<sub>2</sub>S 286.9462, found 286.9457.

Pyridin-3-ylmethyl 4,4,4-trichlorobutanoate (**4q**)

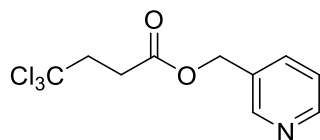

100.7 mg, light yellow oil, yield: 89%. Eluent: pentane/ethyl acetate/dichloromethane = 5/1/1 to 2/1/1.

**<sup>1</sup>H NMR** (400 MHz, CDCl<sub>3</sub>) δ 8.64 (d, *J* = 2.3 Hz, 1H), 8.60 (dd, *J* = 4.9, 1.7 Hz, 1H), 7.71 (dt, *J* = 7.8, 2.0 Hz, 1H), 7.32 (dd, *J* = 7.8, 4.9 Hz, 1H), 5.19 (s, 2H), 3.15 – 3.00 (m, 2H), 2.93 – 2.81 (m, 2H).

**<sup>13</sup>C NMR** (101 MHz, CDCl<sub>3</sub>) δ 170.6, 149.7, 149.6, 136.0, 131.0, 123.3, 98.3, 64.1, 49.6, 31.2.

**HR-MS** (ESI-TOF) *m/z*: [M+H]<sup>+</sup> calcd. for C<sub>10</sub>H<sub>11</sub>Cl<sub>3</sub>NO<sub>2</sub> 281.9850, found 281.9857.

(*E*)-Hex-2-en-1-yl 4,4,4-trichlorobutanoate (**4r**)

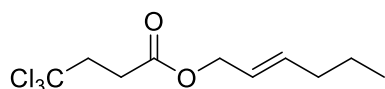

64.8 mg, light yellow oil, yield: 59%. Eluent: pentane/ethyl acetate = 30/1 to 20/1.

**<sup>1</sup>H NMR** (400 MHz, CDCl<sub>3</sub>) δ 5.85 – 5.69 (m, 1H), 5.63 – 5.48 (m, 1H), 4.62 – 4.42 (m, 2H), 3.10 – 2.98 (m, 2H), 2.88 – 2.73 (m, 2H), 2.11 – 1.97 (m, 2H), 1.40 (h, *J* = 7.4 Hz, 2H), 0.89 (t, *J* = 7.4 Hz, 3H).

**<sup>13</sup>C NMR** (101 MHz, CDCl<sub>3</sub>) δ 170.8, 137.0, 123.4, 98.6, 65.9, 49.9, 34.2, 31.5, 22.0, 13.6.

**HR-MS** (ESI-TOF)  $m/z$ :  $[M+H]^+$  calcd. for  $C_{10}H_{16}Cl_3O_2$  273.0210, found 273.0216.

But-2-yn-1-yl 4,4,4-trichlorobutanoate (**4s**)

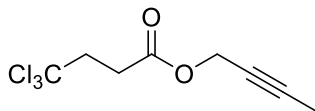

64.1 mg, colorless oil, yield: 66%. Eluent: pentane/ethyl acetate = 30/1 to 20/1.

**$^1H$  NMR** (400 MHz,  $CDCl_3$ )  $\delta$  4.68 (q,  $J = 2.4$  Hz, 2H), 3.10 – 3.01 (m, 2H), 2.87 – 2.79 (m, 2H), 1.85 (t,  $J = 2.4$  Hz, 3H).

**$^{13}C$  NMR** (101 MHz,  $CDCl_3$ )  $\delta$  170.4, 98.4, 83.6, 72.7, 53.3, 49.7, 31.3, 3.6.

**HR-MS** (ESI-TOF)  $m/z$ :  $[M+H]^+$  calcd. for  $C_8H_{10}Cl_3O_2$  242.9741, found 242.9749.

1,2-Phenylenebis(methylene) bis(4,4,4-trichlorobutanoate) (**4t**)

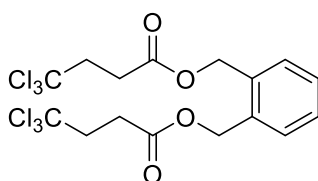

21.9 mg, light yellow oil, yield: 23% (0.2 mmol scale). Eluent: pentane/ethyl acetate = 20/1 to 5/2.

**$^1H$  NMR** (400 MHz,  $CDCl_3$ )  $\delta$  7.46 – 7.41 (m, 2H), 7.41 – 7.35 (m, 2H), 5.27 (s, 4H), 3.12 – 3.02 (m, 4H), 2.91 – 2.80 (m, 4H).

**$^{13}C$  NMR** (101 MHz,  $CDCl_3$ )  $\delta$  170.7, 134.1, 130.1, 129.0, 98.4, 64.3, 49.7, 31.4.

**HR-MS** (ESI-TOF)  $m/z$ :  $[M+NH_4]^+$  calcd. for  $C_{16}H_{20}Cl_6NO_4$  499.9518, found 499.9524,  $[M+Na]^+$  calcd. for  $C_{16}H_{16}Cl_6NaO_4$  504.9072, found 504.9071.

4,4,4-Trichloro-2-(hydroxymethyl)benzyl butanoate (**4u**)

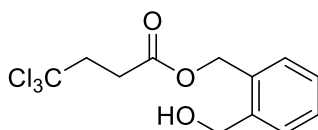

15.0 mg, light yellow oil, yield: 24% (0.2 mmol scale). Eluent: pentane/ethyl acetate = 20/1 to 5/2.

**$^1H$  NMR** (400 MHz,  $CDCl_3$ )  $\delta$  7.46 – 7.39 (m, 2H), 7.38 – 7.31 (m, 2H), 5.30 (s, 2H), 4.77 (s, 2H), 3.11 – 3.02 (m, 2H), 2.90 – 2.80 (m, 2H), 2.06 (s, 1H).

**$^{13}C$  NMR** (101 MHz,  $CDCl_3$ )  $\delta$  170.9, 139.2, 133.4, 129.9, 129.1, 128.8, 128.2, 98.4, 64.5, 62.9, 49.7, 31.5.

**HR-MS** (ESI-TOF)  $m/z$ :  $[M+H]^+$  calcd. for  $C_{12}H_{14}Cl_3O_3$  311.0003, found 311.0002,  $[M+Na]^+$  calcd. for  $C_{12}H_{13}Cl_3NaO_3$  332.9822, found 332.9827.

Ethane-1,2-diyl bis(4,4,4-trichlorobutanoate) (**4v**)

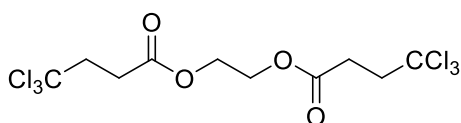

56.1 mg, light yellow oil, yield: 69% (0.2 mmol scale). Eluent: pentane/ethyl acetate = 10/1 to 8/1.

**$^1H$  NMR** (400 MHz,  $CDCl_3$ )  $\delta$  4.34 (s, 4H), 3.13 – 2.99 (m, 4H), 2.89 – 2.74 (m, 4H).

**$^{13}C$  NMR** (101 MHz,  $CDCl_3$ )  $\delta$  170.8, 98.4, 62.5, 49.7, 31.3.



**HR-MS** (ESI-TOF)  $m/z$ :  $[M+NH_4]^+$  calcd. for  $C_{10}H_{16}Cl_6NO_4$  423.9205, found 423.9213,  $[M+Na]^+$  calcd. for  $C_{10}H_{12}Cl_6NaO_4$  428.8759, found 428.8763.

Propane-1,2,3-triyl tris(4,4,4-trichlorobutanoate) (**4w**)

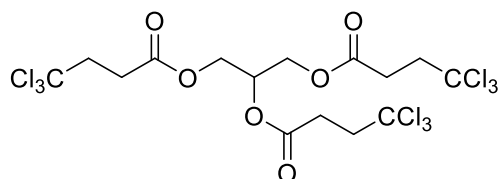

24.5 mg, light yellow oil, yield: 20% (0.2 mmol scale). Eluent: pentane/ethyl acetate = 20:1 to 10:1.

**$^1H$  NMR** (400 MHz,  $CDCl_3$ )  $\delta$  5.40 – 5.27 (m, 1H), 4.41 (dd,  $J$  = 12.0, 4.1 Hz, 2H), 4.23 (dd,  $J$  = 12.1, 5.9 Hz, 2H), 3.14 – 3.00 (m, 6H), 2.90 – 2.76 (m, 6H).

**$^{13}C$  NMR** (101 MHz,  $CDCl_3$ )  $\delta$  170.6, 170.3, 98.3, 69.5, 62.6, 49.6, 31.3, 31.2.

**HR-MS** (ESI-TOF)  $m/z$ :  $[M+NH_4]^+$  calcd. for  $C_{15}H_{21}Cl_9NO_6$  625.8560, found 625.8561.

4,4,4-Trichloro-*N*-(4-(3-ethyl-2,6-dioxopiperidin-3-yl)phenyl)butanamide (**5a**)

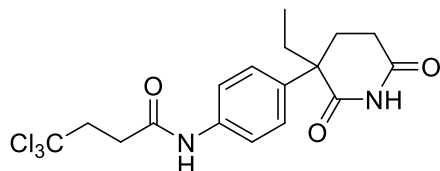

66.1 mg, colorless solid, yield: 81% (0.2 mmol scale). Eluent: pentane/ethyl acetate/dichloromethane = 4/1/1 to 2/1/1.

**$^1H$  NMR** (400 MHz,  $DMSO-d_6$ )  $\delta$  10.83 (s, 1H), 10.19 (s, 1H), 7.59 (d,  $J$  = 8.3 Hz, 2H), 7.22 (d,  $J$  = 8.3 Hz, 2H), 3.11 (dd,  $J$  = 8.9, 6.0 Hz, 2H), 2.80 (dd,  $J$  = 9.0, 6.0 Hz, 2H), 2.51 – 2.41 (m, 1H), 2.36 – 2.25 (m, 1H), 2.21 – 2.08 (m, 2H), 1.92 – 1.71 (m, 2H), 0.74 (t,  $J$  = 7.3 Hz, 3H).

**$^{13}C$  NMR** (101 MHz,  $DMSO-d_6$ )  $\delta$  175.8, 172.8, 168.2, 137.9, 134.3, 126.7, 119.3, 99.8, 49.8, 49.6, 33.3, 32.2, 29.1, 26.0, 8.9.

**HR-MS** (ESI-TOF)  $m/z$ :  $[M+H]^+$  calcd. for  $C_{17}H_{20}Cl_3N_2O_3$  405.0534, found 405.0536.

(1*R*,2*R*,5*R*)-5-Isopropyl-2-methylcyclohexyl 4-(4,4,4-trichlorobutanamido)benzoate (**5b**)

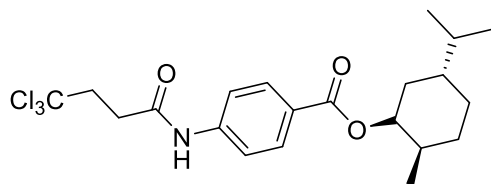

148.7 mg, light yellow solid, yield: 82%. Eluent: pentane/ethyl acetate/dichloromethane = 10/1/1 to 7/1/1.

**$^1H$  NMR** (400 MHz,  $CDCl_3$ )  $\delta$  8.60 (s, 1H), 7.98 (d,  $J$  = 8.5 Hz, 2H), 7.63 (d,  $J$  = 8.4 Hz, 2H), 4.89 (td,  $J$  = 10.8, 4.3 Hz, 1H), 3.20 – 3.08 (m, 2H), 2.94 – 2.81 (m, 2H), 2.13 – 2.03 (m, 1H), 1.97 – 1.86 (m, 1H), 1.77 – 1.64 (m, 2H), 1.59 – 1.44 (m, 2H), 1.16 – 1.03 (m, 2H), 0.97 – 0.84 (m, 1H), 0.89 (d,  $J$  = 6.8 Hz, 6H), 0.76 (d,  $J$  = 6.9 Hz, 3H).

**$^{13}C$  NMR** (101 MHz,  $CDCl_3$ )  $\delta$  168.8, 165.9, 141.9, 130.7, 126.2, 119.1, 98.7, 75.0, 49.9, 47.1, 40.9, 34.2, 31.4, 26.4, 23.6, 21.9, 20.6, 16.5.

**HR-MS** (ESI-TOF)  $m/z$ :  $[M+H]^+$  calcd. for  $C_{21}H_{29}Cl_3NO_3$  448.1208, found 448.1213.

4-(4,4,4-Trichlorobutanamido)phenyl ((1*S*,4*R*)-7,7-dimethyl-2-oxobicyclo[2.2.1]heptan-1-yl)methanesulfonate (**5c**)

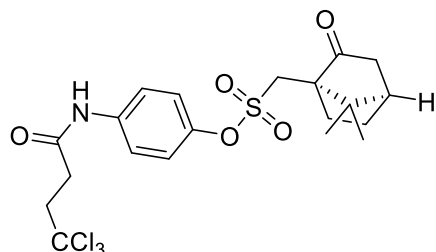

84.3 mg, light yellow oil, yield: 85% (0.2 mmol scale). Eluent: pentane/ethyl acetate/dichloromethane = 5/1/1 to 3/1/1.

**<sup>1</sup>H NMR** (400 MHz, CDCl<sub>3</sub>) δ 8.23 (s, 1H), 7.48 (d, *J* = 9.0 Hz, 2H), 7.16 (d, *J* = 8.9 Hz, 2H), 3.76 (d, *J* = 14.9 Hz, 1H), 3.19 (d, *J* = 15.0 Hz, 1H), 3.15 – 3.05 (m, 2H), 2.87 – 2.75 (m, 2H), 2.53 – 2.35 (m, 2H), 2.14 (t, *J* = 4.5 Hz, 1H), 2.11 – 2.04 (m, 1H), 1.95 (d, *J* = 18.6 Hz, 1H), 1.78 – 1.68 (m, 1H), 1.49 – 1.40 (m, 1H), 1.11 (s, 3H), 0.88 (s, 3H).

**<sup>13</sup>C NMR** (101 MHz, CDCl<sub>3</sub>) δ 214.3, 168.5, 144.7, 136.8, 122.5, 121.2, 98.9, 58.0, 49.9, 48.0, 47.5, 42.7, 42.4, 33.8, 26.7, 25.1, 19.7, 19.6.

**HR-MS** (ESI-TOF) *m/z*: [M+H]<sup>+</sup> calcd. for C<sub>20</sub>H<sub>25</sub>Cl<sub>3</sub>NO<sub>5</sub>S 496.0514, found 496.0520.

4,4,4-Trichloro-*N*-(3-methoxypyrazin-2-yl)-*N*-((4-(4,4,4-trichlorobutanamido)phenyl)sulfonyl)butanamide (**5d**)

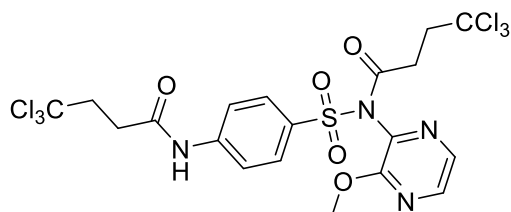

49.2 mg, light yellow solid, yield: 39% (0.2 mmol scale). Eluent: pentane/ethyl acetate/dichloromethane = 5/1/1 to 3/1/1.

**<sup>1</sup>H NMR** (400 MHz, DMSO-*d*<sub>6</sub>) δ 8.53 (d, *J* = 2.6 Hz, 1H), 8.39 (d, *J* = 2.7 Hz, 1H), 8.07 – 7.96 (m, 2H), 7.93 – 7.81 (m, 2H), 4.04 (s, 3H), 3.21 – 3.08 (m, 2H), 2.96 (t, *J* = 6.9 Hz, 2H), 2.92 – 2.87 (m, 2H), 2.42 (t, *J* = 7.0 Hz, 2H).

**<sup>13</sup>C NMR** (101 MHz, DMSO-*d*<sub>6</sub>) δ 169.2, 168.6, 157.6, 144.2, 144.1, 136.5, 134.0, 131.5, 130.4, 118.3, 99.6, 98.6, 54.6, 49.3, 47.9, 33.5, 32.5.

**HR-MS** (ESI-TOF) *m/z*: [M+H]<sup>+</sup> calcd. for C<sub>19</sub>H<sub>19</sub>Cl<sub>3</sub>N<sub>4</sub>O<sub>5</sub>S 624.9202, found 624.9208.

4,4,4-Trichloro-4-(3-oxobutyl)phenyl butanoate (**5e**)

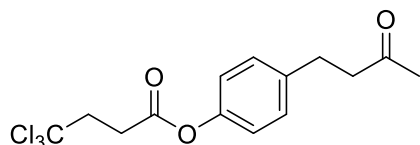

109.6 mg, light yellow oil, yield: 81%. Eluent: pentane/ethyl acetate = 20:1 to 10:1.

**<sup>1</sup>H NMR** (400 MHz, CDCl<sub>3</sub>) δ 7.22 – 7.13 (m, 2H), 7.04 – 6.94 (m, 2H), 3.19 – 3.10 (m, 2H), 3.08 – 2.99 (m, 2H), 2.86 (t, *J* = 7.5 Hz, 2H), 2.73 (t, *J* = 7.2 Hz, 2H), 2.11 (s, 3H).

**<sup>13</sup>C NMR** (101 MHz, CDCl<sub>3</sub>) δ 207.3, 169.5, 148.5, 138.7, 129.2, 121.1, 98.3, 49.5, 44.8, 31.4, 29.9, 28.8.

**HR-MS** (ESI-TOF)  $m/z$ :  $[M+H]^+$  calcd. for  $C_{14}H_{16}Cl_3O_3$  337.0160, found 337.0156.

(8*R*,9*S*,13*S*,14*S*)-13-Methyl-17-oxo-7,8,9,11,12,13,14,15,16,17-decahydro-6*H*-cyclopenta[*a*]phenanthren-3-yl 4,4,4-trichlorobutanoate (**5f**)

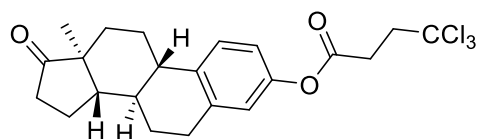

47.6 mg, colorless oil, yield: 78%. Eluent: pentane/ethyl acetate = 20:1 to 15:1.

**<sup>1</sup>H NMR** (400 MHz,  $CDCl_3$ )  $\delta$  7.29 (d,  $J = 8.5$  Hz, 1H), 6.86 (dd,  $J = 8.5, 2.6$  Hz, 1H), 6.82 (d,  $J = 2.5$  Hz, 1H), 3.21 – 3.14 (m, 2H), 3.09 – 3.02 (m, 2H), 2.95 – 2.87 (m, 2H), 2.50 (dd,  $J = 18.7, 8.7$  Hz, 1H), 2.44 – 2.36 (m, 1H), 2.33 – 2.23 (m, 1H), 2.19 – 1.92 (m, 4H), 1.69 – 1.41 (m, 6H), 0.90 (s, 3H).

**<sup>13</sup>C NMR** (101 MHz,  $CDCl_3$ )  $\delta$  220.5, 169.7, 148.2, 138.0, 137.5, 126.3, 121.2, 118.4, 98.3, 50.3, 49.6, 47.8, 44.0, 37.8, 35.7, 31.5, 31.4, 29.3, 26.2, 25.6, 21.4, 13.7.

**HR-MS** (ESI-TOF)  $m/z$ :  $[M+H]^+$  calcd. for  $C_{22}H_{26}Cl_3O_3$  443.0942, found 443.0941.

3-Oxo-3*H*-spiro[isobenzofuran-1,9'-xanthene]-3',6'-diyl bis(4,4,4-trichlorobutanoate) (**5g**)

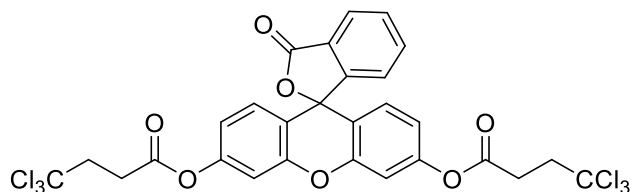

108.3 mg, light yellow solid, yield: 80% (0.2 mmol scale). Eluent: pentane/ethyl acetate/dichloromethane = 10/1/1 to 6/1/1.

**<sup>1</sup>H NMR** (400 MHz,  $CDCl_3$ )  $\delta$  8.03 (dd,  $J = 7.1, 1.4$  Hz, 1H), 7.73 – 7.59 (m, 2H), 7.18 (dd,  $J = 7.4, 1.2$  Hz, 1H), 7.13 – 7.07 (m, 2H), 6.87 – 6.80 (m, 4H), 3.20 – 3.13 (m, 4H), 3.11 – 3.04 (m, 4H).

**<sup>13</sup>C NMR** (101 MHz,  $CDCl_3$ )  $\delta$  169.0, 168.9, 152.6, 151.6, 151.4, 135.3, 130.1, 129.0, 125.9, 125.2, 123.9, 117.5, 116.6, 110.2, 98.2, 81.3, 49.4, 31.5.

**HR-MS** (ESI-TOF)  $m/z$ :  $[M+H]^+$  calcd. for  $C_{28}H_{19}Cl_6O_7$  676.9256, found 676.9252.

((3*aS*,5*aR*,8*aR*,8*bS*)-2,2,7,7-Tetramethyltetrahydro-3*aH*-bis([1,3]dioxolo)[4,5-*b*:4',5'-*d*]pyran-3*a*-yl)methyl 4,4,4-trichlorobutanoate (**5h**)

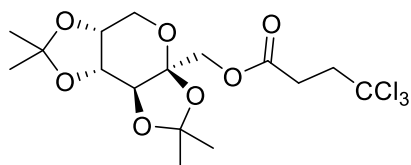

100.5 mg, light yellow oil, yield: 58%. Eluent: pentane/ethyl acetate = 10/1.

**<sup>1</sup>H NMR** (400 MHz,  $CDCl_3$ )  $\delta$  4.58 (dd,  $J = 7.9, 2.6$  Hz, 1H), 4.43 (d,  $J = 11.6$  Hz, 1H), 4.27 (d,  $J = 2.6$  Hz, 1H), 4.21 (dd,  $J = 7.9, 1.7$  Hz, 1H), 4.04 (d,  $J = 11.6$  Hz, 1H), 3.87 (dd,  $J = 13.0, 1.9$  Hz, 1H), 3.74 (d,  $J = 13.0$  Hz, 1H), 3.10 – 3.00 (m, 2H), 2.88 – 2.80 (m, 2H), 1.51 (s, 3H), 1.45 (s, 3H), 1.38 (s, 3H), 1.31 (s, 3H).

**<sup>13</sup>C NMR** (101 MHz,  $CDCl_3$ )  $\delta$  170.3, 109.0, 108.7, 101.3, 98.3, 70.6, 70.5, 69.9, 65.8, 61.2, 49.7, 31.2, 26.4, 25.8, 25.1, 24.0.

**HR-MS** (ESI-TOF)  $m/z$ :  $[M+H]^+$  calcd. for  $C_{16}H_{24}Cl_3O_7$  433.0582, found 433.0588.

(1*R*,2*R*,5*R*)-5-Isopropyl-2-methylcyclohexyl 4,4,4-trichlorobutanoate (**5i**)

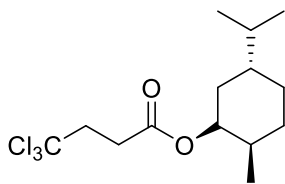

84.1 mg, light yellow oil, yield: 64%. Eluent: pentane/ethyl acetate = 30/1.

<sup>1</sup>H NMR (400 MHz, CDCl<sub>3</sub>) δ 4.72 (td, *J* = 10.8, 4.4 Hz, 1H), 3.11 – 2.98 (m, 2H), 2.83 – 2.72 (m, 2H), 2.03 – 1.95 (m, 1H), 1.90 – 1.79 (m, 1H), 1.74 – 1.64 (m, 2H), 1.55 – 1.43 (m, 1H), 1.43 – 1.34 (m, 1H), 1.11 – 1.02 (m, 1H), 1.01 – 0.93 (m, 1H), 0.93 – 0.85 (m, 1H), 0.90 (dd, *J* = 6.8, 1.6 Hz, 6H), 0.76 (d, *J* = 6.9 Hz, 3H).

<sup>13</sup>C NMR (101 MHz, CDCl<sub>3</sub>) δ 170.6, 98.7, 75.0, 49.9, 46.9, 40.8, 34.1, 31.7, 31.3, 26.3, 23.4, 22.0, 20.7, 16.3.

HR-MS (ESI-TOF) *m/z*: [M+H]<sup>+</sup> calcd. for C<sub>14</sub>H<sub>27</sub>NCl<sub>3</sub>O<sub>2</sub> 346.1102, found 346.1106; [M+Na]<sup>+</sup> calcd. for C<sub>14</sub>H<sub>23</sub>NaCl<sub>3</sub>O<sub>2</sub> 351.0656, found 351.0656.

(3*S*,5*S*,8*R*,9*S*,10*S*,13*S*,14*S*)-10,13-Dimethyl-17-oxohexadecahydro-1*H*-cyclopenta[*a*]phenanthren-3-yl 4,4,4-trichlorobutanoate (**5j**)

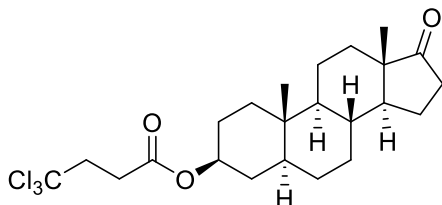

68.2 mg, colorless solid, yield: 74% (0.2 mmol scale). Eluent: pentane/ethyl acetate/dichloromethane = 20/1/1 to 15/1/1.

<sup>1</sup>H NMR (400 MHz, CDCl<sub>3</sub>) δ 4.74 (tt, *J* = 10.9, 4.9 Hz, 1H), 3.11 – 2.99 (m, 2H), 2.84 – 2.73 (m, 2H), 2.43 (dd, *J* = 19.2, 8.8 Hz, 1H), 2.07 (dt, *J* = 18.8, 9.0 Hz, 1H), 1.98 – 1.89 (m, 1H), 1.87 – 1.72 (m, 4H), 1.70 – 1.61 (m, 2H), 1.59 – 1.46 (m, 3H), 1.43 – 1.20 (m, 7H), 1.10 – 0.93 (m, 2H), 0.86 (s, 6H), 0.72 (td, *J* = 11.9, 11.3, 3.9 Hz, 1H).

<sup>13</sup>C NMR (101 MHz, CDCl<sub>3</sub>) δ 221.0, 170.4, 98.6, 74.2, 54.2, 51.3, 49.9, 47.7, 44.5, 36.6, 35.7, 35.5, 34.9, 33.8, 31.8, 31.4, 30.7, 28.2, 27.3, 21.7, 20.4, 13.7, 12.1.

HR-MS (ESI-TOF) *m/z*: [M+H]<sup>+</sup> calcd. for C<sub>23</sub>H<sub>34</sub>Cl<sub>3</sub>O<sub>3</sub> 463.1568, found 463.1561.

(3*S*,8*S*,9*S*,10*R*,13*S*,14*S*,17*S*)-17-Acetyl-10,13-dimethyl-2,3,4,7,8,9,10,11,12,13,14,15,16,17-tetradecahydro-1*H*-cyclopenta[*a*]phenanthren-3-yl 4,4,4-trichlorobutanoate (**5k**)

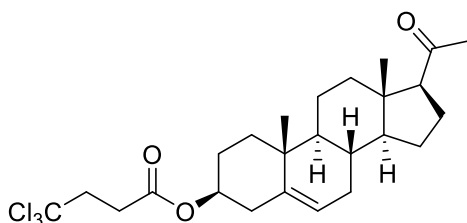

57.3 mg, colorless oil, yield: 58% (0.2 mmol scale). Eluent: pentane/ethyl acetate/dichloromethane = 20/1/1 to 15/1/1.

<sup>1</sup>H NMR (400 MHz, CDCl<sub>3</sub>) δ 5.36 (dt, *J* = 3.4, 1.7 Hz, 1H), 4.71 – 4.56 (m, 1H), 3.11 – 2.96 (m, 2H), 2.82 – 2.72 (m, 2H), 2.52 (t, *J* = 8.9 Hz, 1H), 2.32 (d, *J* = 7.9 Hz, 2H), 2.22 – 2.13 (m, 1H), 2.10 (s, 3H), 2.07 – 1.94 (m,

2H), 1.91 – 1.82 (m, 2H), 1.71 – 1.54 (m, 5H), 1.54 – 1.42 (m, 3H), 1.28 – 1.08 (m, 4H), 1.01 (s, 3H), 0.61 (s, 3H).

<sup>13</sup>C NMR (101 MHz, CDCl<sub>3</sub>) δ 209.4, 170.4, 139.4, 122.5, 98.6, 74.6, 63.6, 56.8, 49.9, 49.8, 43.9, 38.7, 37.9, 36.9, 36.5, 31.8, 31.76, 31.74, 31.5, 27.6, 24.4, 22.8, 21.0, 19.2, 13.2.

**HR-MS** (ESI-TOF) m/z: [M+H]<sup>+</sup> calcd. for C<sub>25</sub>H<sub>36</sub>Cl<sub>3</sub>O<sub>3</sub> 489.1725, found 489.1732.

(8*R*,9*S*,13*S*,14*S*,17*R*)-13-Methyl-17-((4,4,4-trichlorobutanoyl)oxy)-7,8,9,11,12,13,14,15,16,17-decahydro-6*H*-cyclopenta[*a*]phenanthren-3-yl benzoate (**5l**)

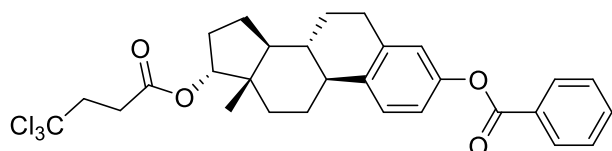

40.2 mg, colorless solid, yield: 69% (0.1 mmol scale). Eluent: pentane/ethyl acetate = 20/1 to 10/1.

<sup>1</sup>H NMR (400 MHz, CDCl<sub>3</sub>) δ 8.20 (d, *J* = 7.0 Hz, 2H), 7.63 (t, *J* = 7.6 Hz, 1H), 7.51 (t, *J* = 7.6 Hz, 2H), 7.34 (d, *J* = 8.5 Hz, 1H), 6.98 (dd, *J* = 8.4, 2.6 Hz, 1H), 6.94 (d, *J* = 2.4 Hz, 1H), 4.83 – 4.70 (m, 1H), 3.16 – 3.06 (m, 2H), 2.96 – 2.88 (m, 2H), 2.88 – 2.79 (m, 2H), 2.39 – 2.18 (m, 3H), 1.97 – 1.87 (m, 2H), 1.83 – 1.73 (m, 1H), 1.64 – 1.58 (m, 1H), 1.57 – 1.49 (m, 2H), 1.48 – 1.40 (m, 2H), 1.39 – 1.26 (m, 2H), 0.87 (s, 3H).

<sup>13</sup>C NMR (101 MHz, CDCl<sub>3</sub>) δ 171.0, 165.4, 148.7, 138.1, 137.7, 133.4, 130.1, 129.6, 128.5, 126.4, 121.6, 118.7, 98.6, 83.4, 49.9, 49.7, 43.9, 42.9, 38.2, 36.8, 31.6, 29.5, 27.5, 27.0, 26.0, 23.2, 12.1.

**HR-MS** (ESI-TOF) m/z: [M+H]<sup>+</sup> calcd. for C<sub>29</sub>H<sub>32</sub>Cl<sub>3</sub>O<sub>4</sub> 549.1361, found 549.1362.

(*R*)-1-(4-Fluorophenyl)-3-((3*R*,4*S*)-1-(4-fluorophenyl)-2-oxo-4-(4-((4,4,4-trichlorobutanoyl)oxy)phenyl)azetidin-3-yl)propyl 4,4,4-trichlorobutanoate (**5m**)

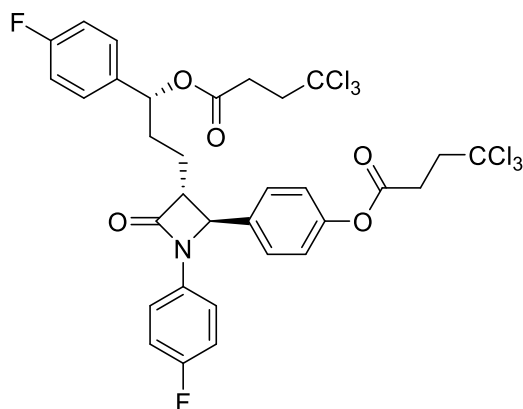

49.5 mg, light yellow oil (0.1 mmol scale), yield: 65%. Eluent: pentane/ethyl acetate/dichloromethane = 10/1/1 to 5/1/1.

<sup>1</sup>H NMR (400 MHz, CDCl<sub>3</sub>) δ 7.37 – 7.32 (m, 2H), 7.31 – 7.25 (m, 2H), 7.24 – 7.18 (m, 2H), 7.16 – 7.11 (m, 2H), 7.07 – 7.00 (m, 2H), 6.97 – 6.90 (m, 2H), 5.74 (t, *J* = 6.8 Hz, 1H), 4.61 (d, *J* = 2.4 Hz, 1H), 3.22 – 3.13 (m, 2H), 3.11 – 2.96 (m, 5H), 2.90 – 2.72 (m, 2H), 2.15 – 2.02 (m, 2H), 1.97 – 1.78 (m, 2H).

<sup>13</sup>C NMR (101 MHz, CDCl<sub>3</sub>) δ 170.2, 169.5, 166.5, 162.5 (d, *J* = 247.3 Hz), 159.0 (d, *J* = 243.8 Hz), 150.5, 135.2, 135.1 (d, *J* = 3.3 Hz), 133.6 (d, *J* = 2.7 Hz), 128.3 (d, *J* = 8.2 Hz), 127.0, 122.4, 118.3 (d, *J* = 7.9 Hz), 115.9 (d, *J* = 22.7 Hz), 115.7 (d, *J* = 21.6 Hz), 98.4, 98.2, 75.6, 60.6, 60.1, 49.63, 49.60, 33.4, 31.5, 24.9.

<sup>19</sup>F NMR (376 MHz, CDCl<sub>3</sub>) δ -113.2, -117.6.

**HR-MS** (ESI-TOF)  $m/z$ :  $[M+NH_4]^+$  calcd. for  $C_{32}H_{31}Cl_6F_2N_2O_5$  771.0327, found 771.0321,  $[M+Na]^+$  calcd. for  $C_{32}H_{27}Cl_6F_2NNaO_5$  775.9881, found 775.9882.

6,6,6-Trichloro-*N*-phenylhexanamide (**6a**)

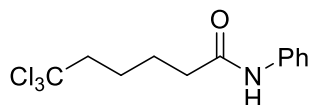

47.1 mg, light yellow solid, yield: 40%. Eluent: pentane/ethyl acetate/dichloromethane = 15/1/1 to 8/1/1.

**<sup>1</sup>H NMR** (400 MHz,  $CDCl_3$ )  $\delta$  7.75 (s, 1H), 7.51 (d,  $J = 7.9$  Hz, 2H), 7.30 (t,  $J = 7.8$  Hz, 2H), 7.10 (t,  $J = 7.4$  Hz, 1H), 2.75 – 2.64 (m, 2H), 2.40 (t,  $J = 6.7$  Hz, 2H), 1.87 – 1.74 (m, 4H).

**<sup>13</sup>C NMR** (101 MHz,  $CDCl_3$ )  $\delta$  170.8, 137.7, 128.9, 124.4, 120.1, 99.7, 54.7, 37.0, 26.0, 24.1.

**HR-MS** (ESI-TOF)  $m/z$ :  $[M+H]^+$  calcd. for  $C_{12}H_{15}Cl_3NO$  294.0214, found 294.0221.

6,6,6-Trichloro-*N*-(3-methoxyphenyl)hexanamide (**6b**)

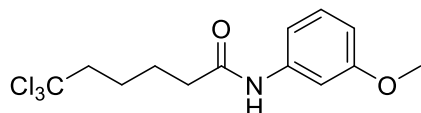

55.8 mg, light yellow oil, yield: 43%. Eluent: pentane/ethyl acetate/dichloromethane = 15/1/1 to 6/1/1.

**<sup>1</sup>H NMR** (700 MHz,  $CDCl_3$ )  $\delta$  7.63 (s, 1H), 7.29 (t,  $J = 2.3$  Hz, 1H), 7.19 (t,  $J = 8.1$  Hz, 1H), 6.98 (d,  $J = 7.6$  Hz, 1H), 6.65 (dd,  $J = 8.1, 2.7$  Hz, 1H), 3.77 (s, 3H), 2.68 (t,  $J = 7.3$  Hz, 2H), 2.40 (t,  $J = 6.8$  Hz, 2H), 1.87 – 1.78 (m, 4H).

**<sup>13</sup>C NMR** (176 MHz,  $CDCl_3$ )  $\delta$  170.7, 160.1, 139.0, 129.6, 112.0, 110.0, 105.8, 99.7, 55.2, 54.7, 37.1, 26.0, 24.0.

**HR-MS** (ESI-TOF)  $m/z$ :  $[M+H]^+$  calcd. for  $C_{13}H_{17}Cl_3NO_2$  324.0319, found 324.0321.

6,6,6-Trichloro-*N*-(3-(trifluoromethyl)phenyl)hexanamide (**6c**)

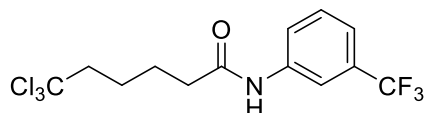

55.1 mg, light yellow oil, yield: 38%. Eluent: pentane/ethyl acetate/dichloromethane = 15/1/1 to 8/1/1.

**<sup>1</sup>H NMR** (400 MHz,  $CDCl_3$ )  $\delta$  7.81 (s, 1H), 7.70 (d,  $J = 8.4$  Hz, 2H), 7.42 (t,  $J = 7.9$  Hz, 1H), 7.35 (d,  $J = 7.9$  Hz, 1H), 2.74 – 2.66 (m, 2H), 2.49 – 2.41 (m, 2H), 1.89 – 1.80 (m, 4H).

**<sup>13</sup>C NMR** (101 MHz,  $CDCl_3$ )  $\delta$  171.0, 138.2, 131.4 (q,  $J = 32.5$  Hz), 129.5, 123.8 (q,  $J = 272.4$  Hz), 123.0, 120.9 (q,  $J = 3.6$  Hz), 116.6 (q,  $J = 3.7$  Hz), 99.6, 54.7, 37.0, 26.0, 23.9.

**<sup>19</sup>F NMR** (376 MHz,  $CDCl_3$ )  $\delta$  -62.7.

**HR-MS** (ESI-TOF)  $m/z$ :  $[M+H]^+$  calcd. for  $C_{13}H_{14}Cl_3F_3NO$  362.0088, found 362.0093.

6,6,6-Trichloro-*N*-(4-(*tert*-butyl)phenyl)hexanamide (**6d**)

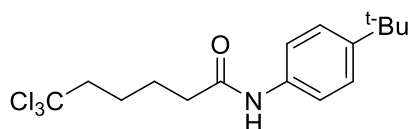

57.5 mg, light yellow solid, yield: 41%. Eluent: pentane/ethyl acetate/dichloromethane = 15/1/1 to 8/1/1.

**<sup>1</sup>H NMR** (400 MHz,  $CDCl_3$ )  $\delta$  7.65 (s, 1H), 7.43 (d,  $J = 8.6$  Hz, 2H), 7.32 (d,  $J = 8.7$  Hz, 2H), 2.69 (t,  $J = 7.3$  Hz, 2H), 2.40 (t,  $J = 6.7$  Hz, 2H), 1.91 – 1.77 (m,  $J = 4.8$  Hz, 4H), 1.30 (s, 9H).

$^{13}\text{C}$  NMR (101 MHz,  $\text{CDCl}_3$ )  $\delta$  170.6, 147.3, 135.1, 125.7, 119.8, 99.7, 54.7, 37.0, 34.3, 31.3, 26.0, 24.2.

**HR-MS** (ESI-TOF)  $m/z$ :  $[\text{M}+\text{H}]^+$  calcd. for  $\text{C}_{16}\text{H}_{23}\text{Cl}_3\text{NO}$  350.0840, found 350.0846.

6,6,6-Trichloro-*N*-(4-(methylthio)phenyl)hexanamide (**6e**)

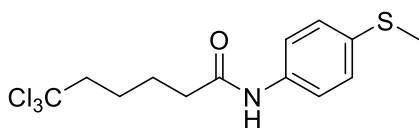

54.5 mg, light yellow solid, yield: 40%. Eluent: pentane/ethyl acetate/dichloromethane = 15/1/1 to 7/1/1.

$^1\text{H}$  NMR (700 MHz,  $\text{CDCl}_3$ )  $\delta$  7.68 (s, 1H), 7.42 (d,  $J = 8.3$  Hz, 2H), 7.20 (d,  $J = 8.6$  Hz, 2H), 2.71 – 2.64 (m, 2H), 2.44 (s, 3H), 2.39 (t,  $J = 6.9$  Hz, 2H), 1.87 – 1.76 (m, 4H).

$^{13}\text{C}$  NMR (176 MHz,  $\text{CDCl}_3$ )  $\delta$  170.7, 135.3, 133.7, 127.8, 120.7, 99.6, 54.7, 36.9, 26.0, 24.0, 16.5.

**HR-MS** (ESI-TOF)  $m/z$ :  $[\text{M}+\text{H}]^+$  calcd. for  $\text{C}_{13}\text{H}_{17}\text{Cl}_3\text{NOS}$  340.0091, found 340.0094.

6,6,6-Trichloro-*N*-(4-(trifluoromethyl)phenyl)hexanamide (**6f**)

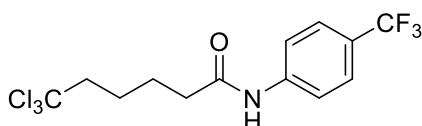

50.8 mg, light yellow oil, yield: 35%. Eluent: pentane/ethyl acetate/dichloromethane = 15/1/1 to 8/1/1.

$^1\text{H}$  NMR (700 MHz,  $\text{CDCl}_3$ )  $\delta$  7.64 (d,  $J = 8.4$  Hz, 2H), 7.56 (d,  $J = 8.4$  Hz, 2H), 7.52 (s, 1H), 2.75 – 2.68 (m, 2H), 2.46 (t,  $J = 6.7$  Hz, 2H), 1.90 – 1.82 (m, 4H).

$^{13}\text{C}$  NMR (176 MHz,  $\text{CDCl}_3$ )  $\delta$  170.8, 140.8, 126.3 (q,  $J = 3.6$  Hz), 126.0, 124.0 (q,  $J = 271.8$  Hz), 119.4, 99.6, 54.7, 37.1, 26.0, 23.9.

$^{19}\text{F}$  NMR (376 MHz,  $\text{CDCl}_3$ )  $\delta$  -62.1.

**HR-MS** (ESI-TOF)  $m/z$ :  $[\text{M}+\text{H}]^+$  calcd. for  $\text{C}_{13}\text{H}_{14}\text{Cl}_3\text{F}_3\text{NO}$  362.0088, found 362.0082.

6,6,6-Trichloro-*N*-(4-(trifluoromethoxy)phenyl)hexanamide (**6g**)

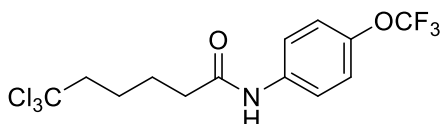

59.1 mg, light yellow oil, yield: 39%. Eluent: pentane/ethyl acetate/dichloromethane = 15/1/1 to 8/1/1.

$^1\text{H}$  NMR (700 MHz,  $\text{CDCl}_3$ )  $\delta$  7.82 – 7.67 (m, 1H), 7.53 (d,  $J = 8.7$  Hz, 2H), 7.15 (d,  $J = 8.5$  Hz, 2H), 2.73 – 2.64 (m, 2H), 2.42 (t,  $J = 6.8$  Hz, 2H), 1.87 – 1.78 (m, 4H).

$^{13}\text{C}$  NMR (176 MHz,  $\text{CDCl}_3$ )  $\delta$  170.8, 145.3, 136.3, 121.7, 121.2, 120.4 (q,  $J = 257.0$  Hz), 99.6, 54.7, 36.9, 26.0, 24.0.

$^{19}\text{F}$  NMR (376 MHz,  $\text{CDCl}_3$ )  $\delta$  -58.1.

**HR-MS** (ESI-TOF)  $m/z$ :  $[\text{M}+\text{H}]^+$  calcd. for  $\text{C}_{13}\text{H}_{14}\text{Cl}_3\text{F}_3\text{NO}_2$  378.0037, found 378.0040.

6,6,6-Trichloro-*N*-(4-bromophenyl)hexanamide (**6h**)

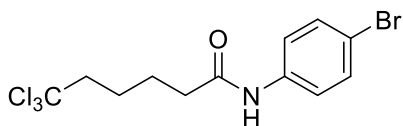

65.7 mg, light yellow oil, yield: 44%. Eluent: pentane/ethyl acetate/dichloromethane = 15/1/1 to 8/1/1.

**<sup>1</sup>H NMR** (400 MHz, CDCl<sub>3</sub>) δ 7.75 (s, 1H), 7.39 (s, 4H), 2.75 – 2.60 (m, 2H), 2.39 (t, *J* = 6.6 Hz, 2H), 1.90 – 1.70 (m, *J* = 4.9 Hz, 4H).

**<sup>13</sup>C NMR** (101 MHz, CDCl<sub>3</sub>) δ 170.8, 136.8, 131.9, 121.6, 117.0, 99.6, 54.7, 36.9, 26.0, 24.0.

**HR-MS** (ESI-TOF) *m/z*: [M+H]<sup>+</sup> calcd. for C<sub>12</sub>H<sub>14</sub>ICl<sub>3</sub>NO 371.9319, found 371.9322.

6,6,6-Trichloro-*N*-(4-iodophenyl)hexanamide (**6i**)

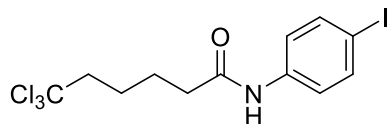

77.4 mg, light yellow solid, yield: 46%. Eluent: pentane/ethyl acetate/dichloromethane = 15/1/1 to 8/1/1.

**<sup>1</sup>H NMR** (700 MHz, CDCl<sub>3</sub>) δ 7.67 (s, 1H), 7.58 (d, *J* = 8.4 Hz, 2H), 7.27 (d, *J* = 8.4 Hz, 2H), 2.71 – 2.65 (m, 2H), 2.39 (t, *J* = 6.9 Hz, 2H), 1.86 – 1.76 (m, 4H).

**<sup>13</sup>C NMR** (176 MHz, CDCl<sub>3</sub>) δ 170.8, 137.8, 137.5, 121.8, 99.6, 87.6, 54.7, 37.0, 26.0, 23.9.

**HR-MS** (ESI-TOF) *m/z*: [M+H]<sup>+</sup> calcd. for C<sub>12</sub>H<sub>14</sub>ICl<sub>3</sub>NO 419.9180, found 419.9182.



## 5. <sup>1</sup>H-, <sup>13</sup>C- and <sup>19</sup>F-NMR spectra copy of products

3a

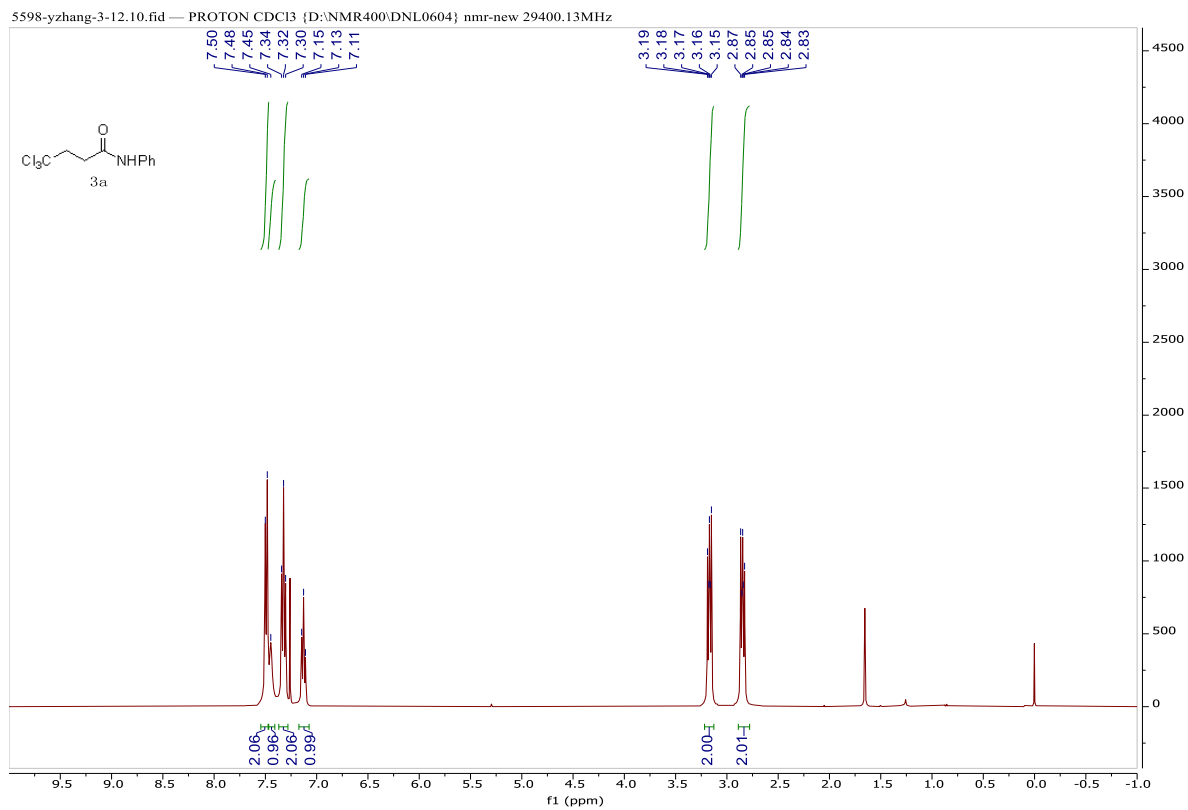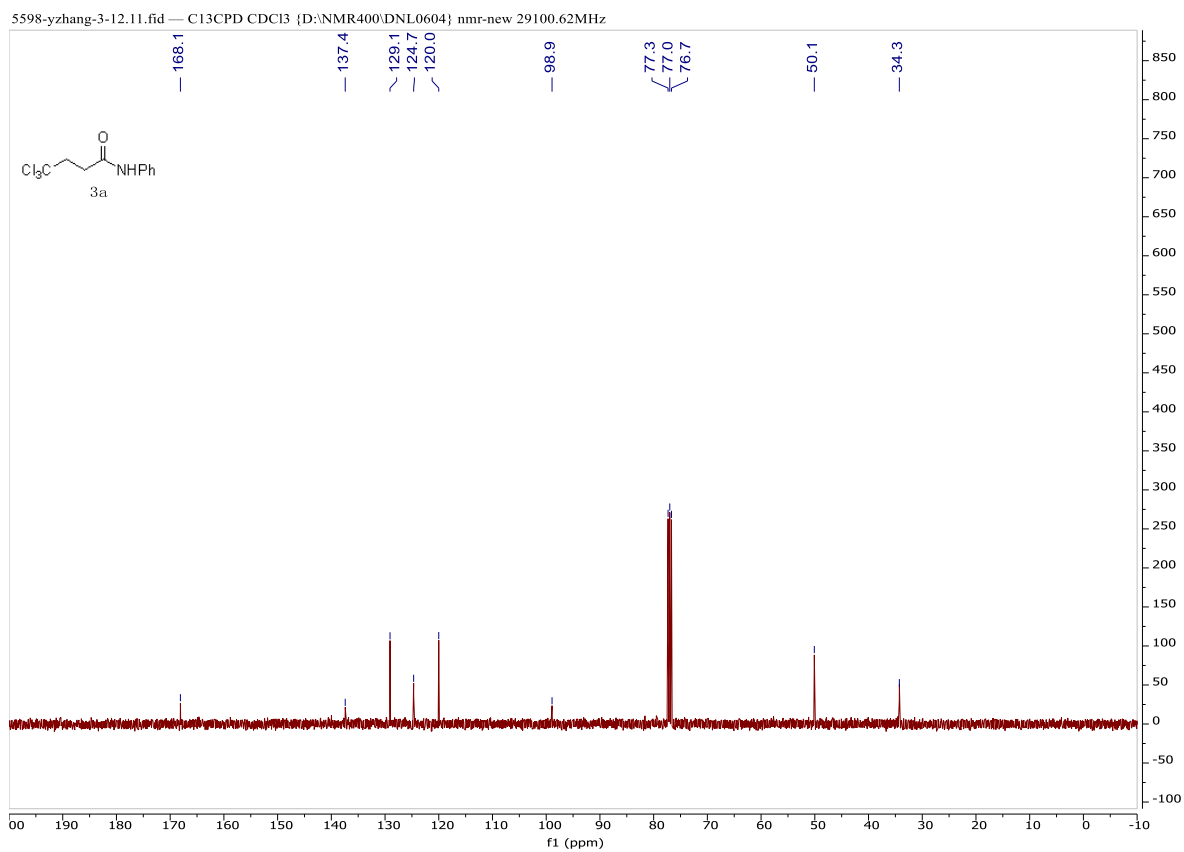

3b

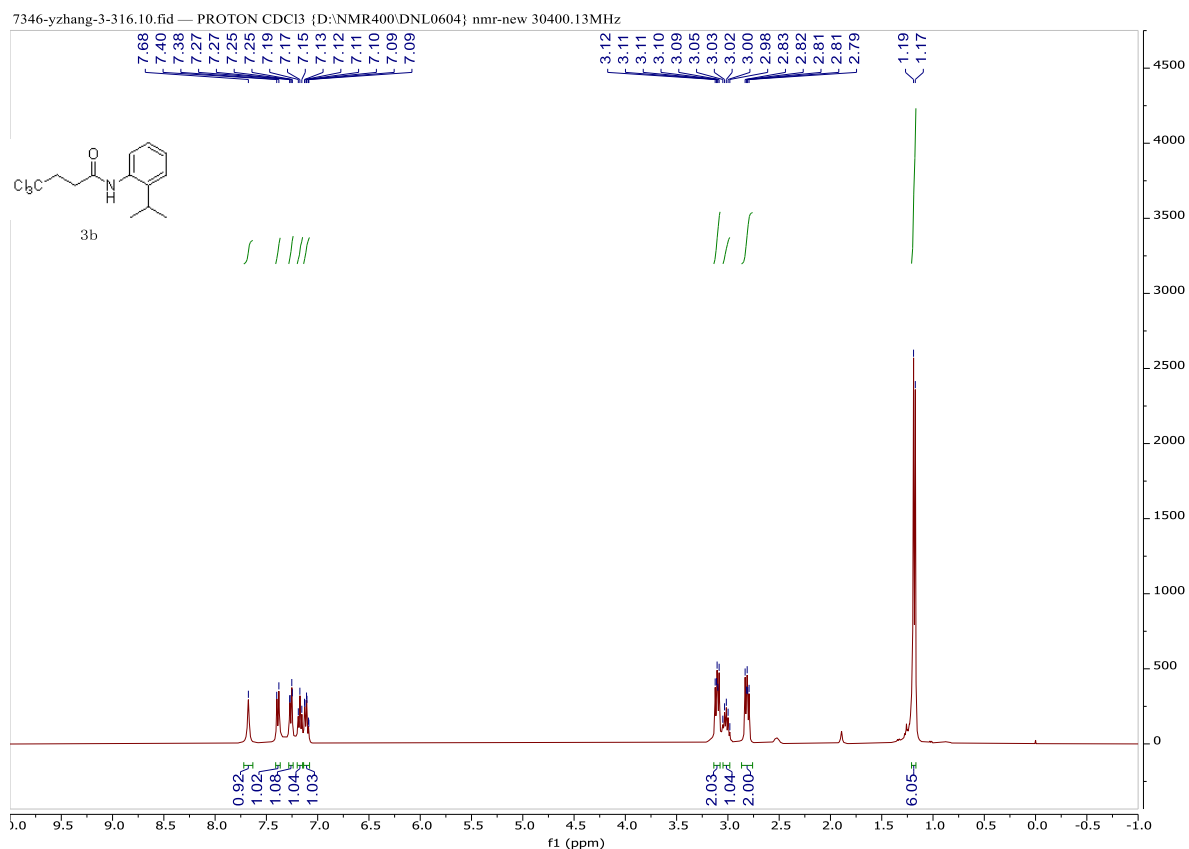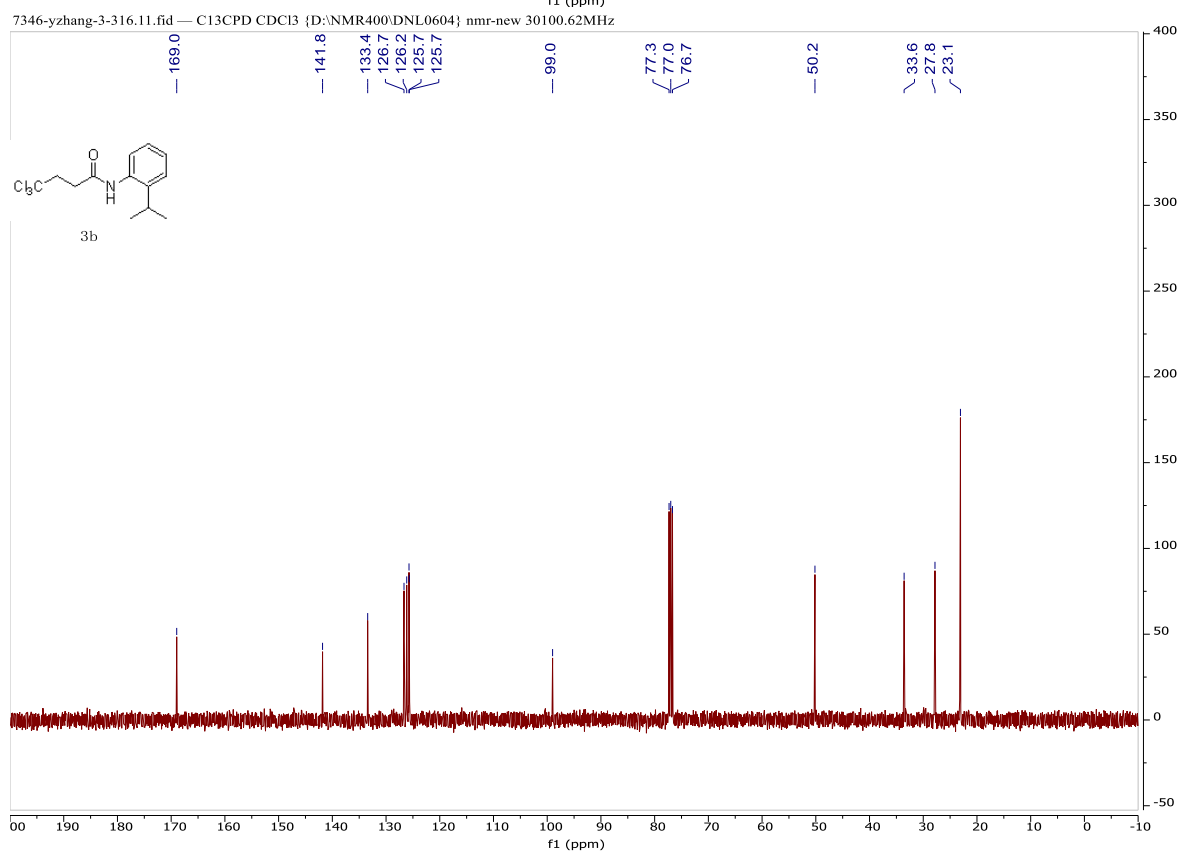

3c

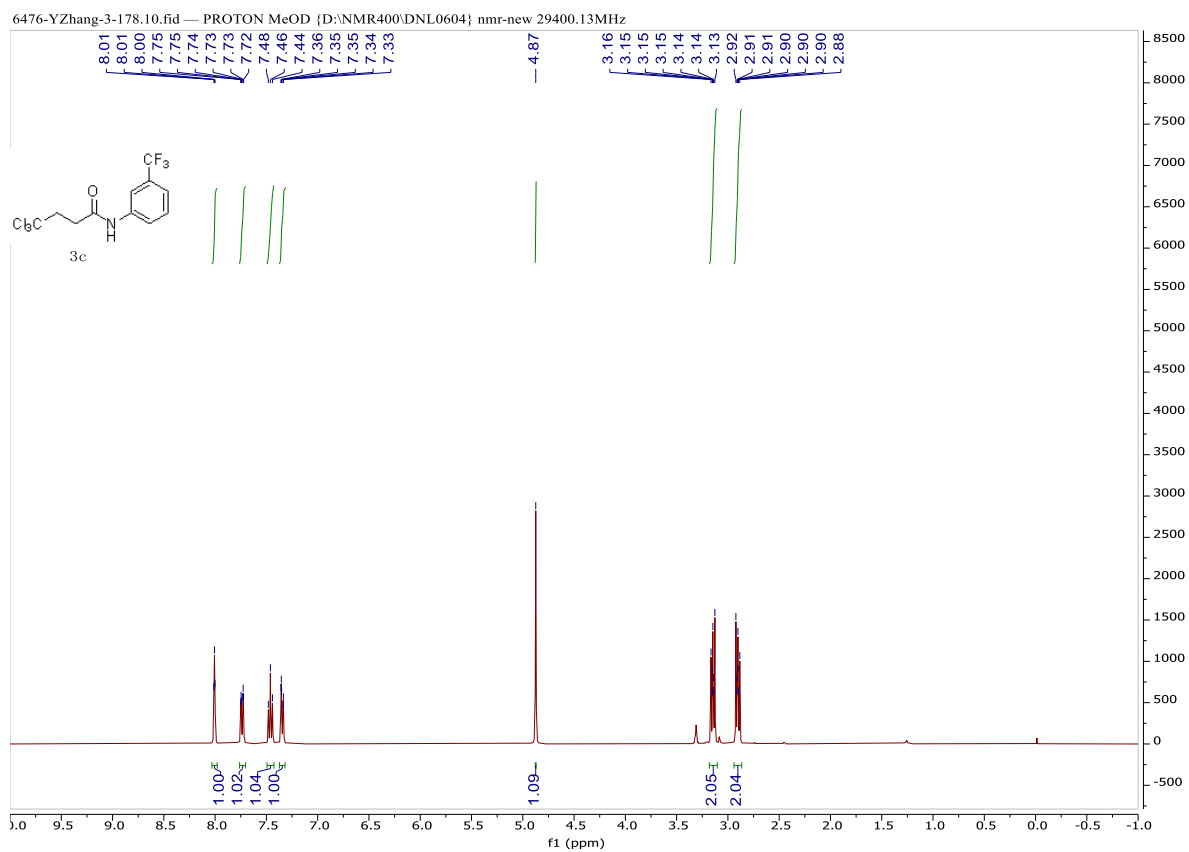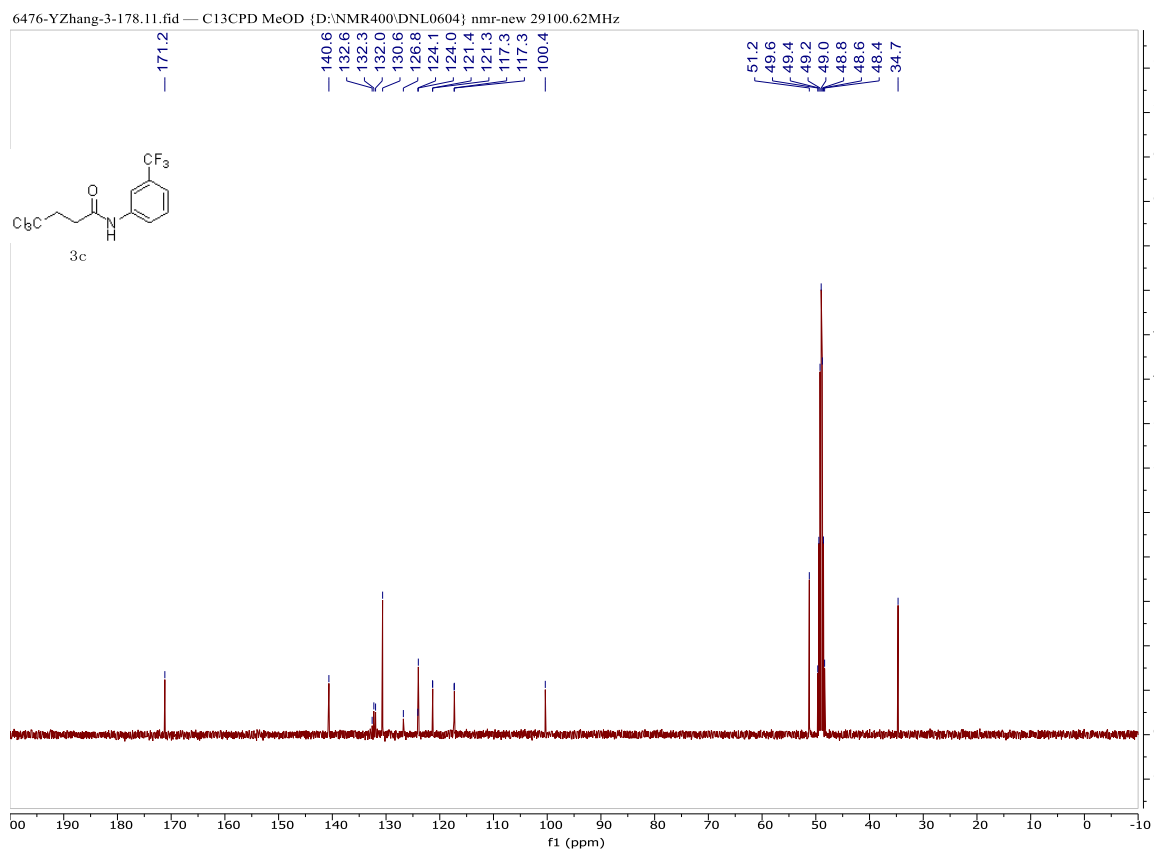

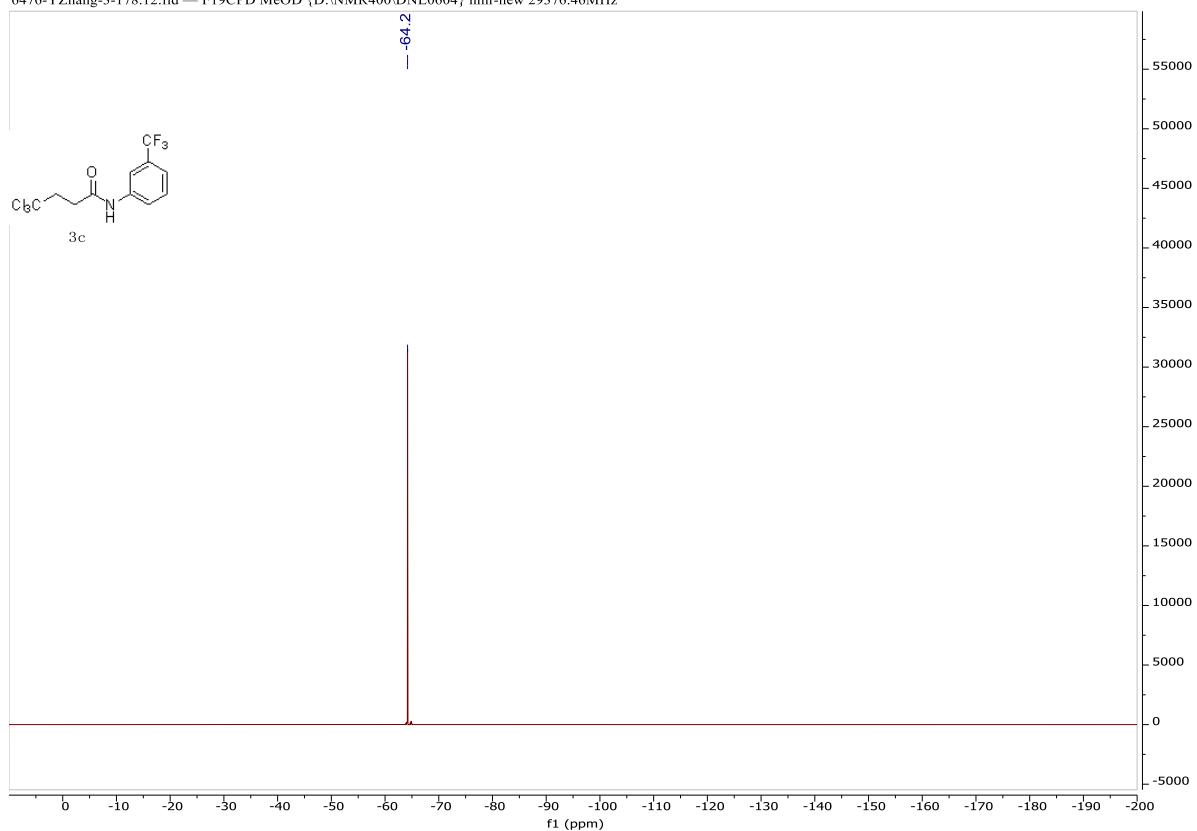

3d

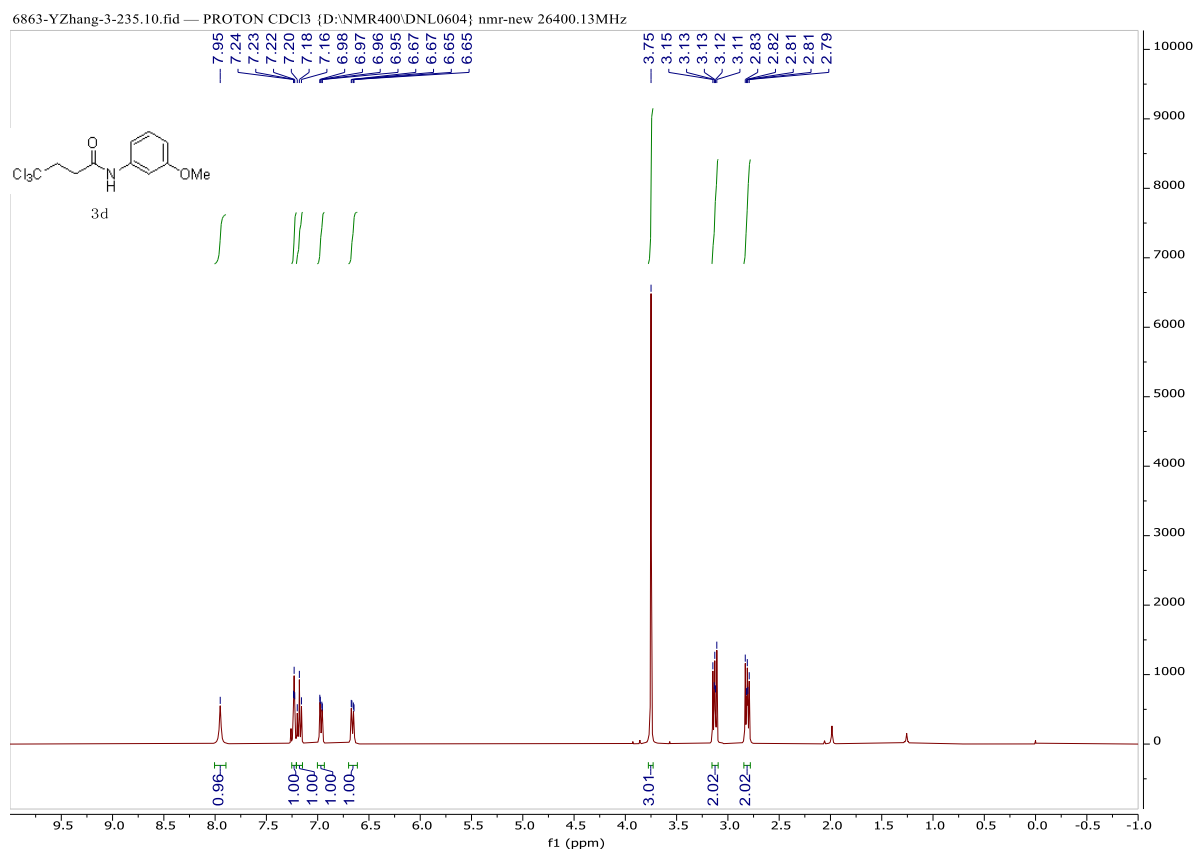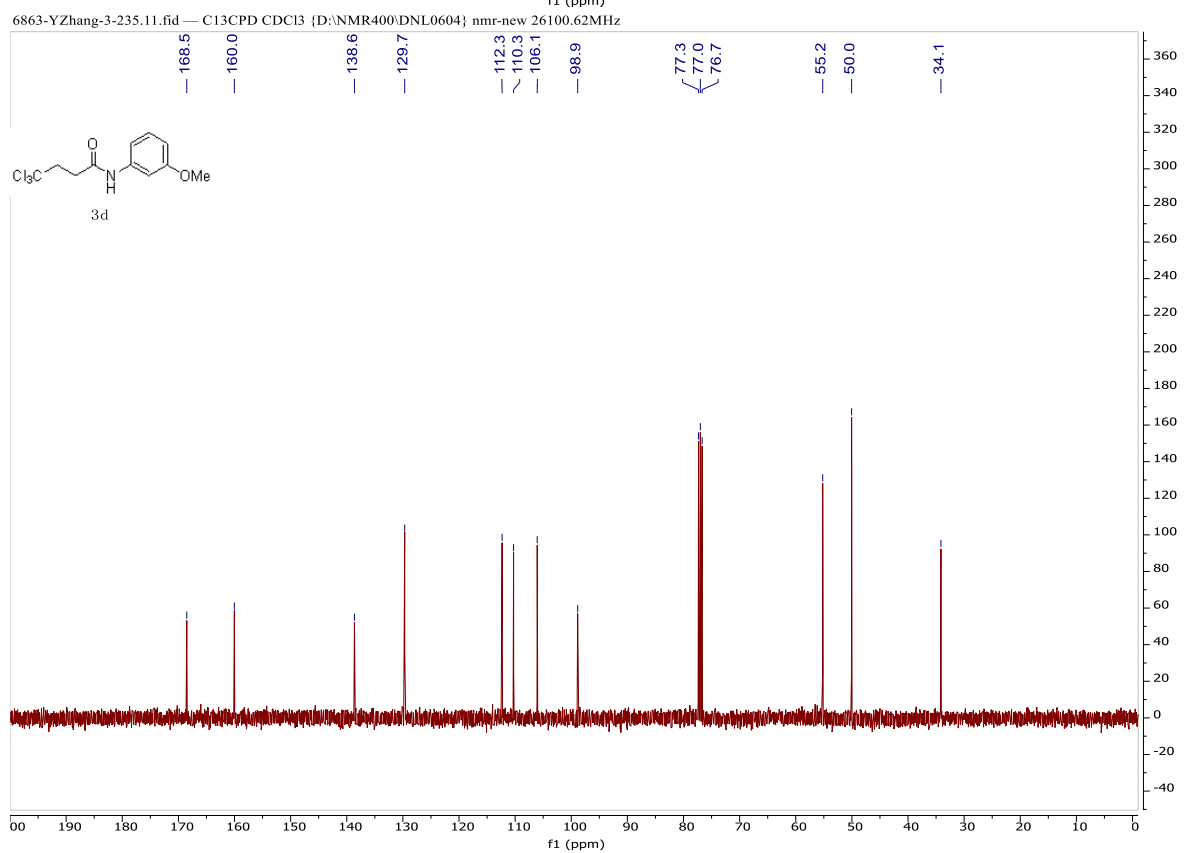

3e

6606-yzhang-3-187.10.fid — PROTON DMSO {D:\NMR400\DNL0604} nmr-new 53400.13MHz

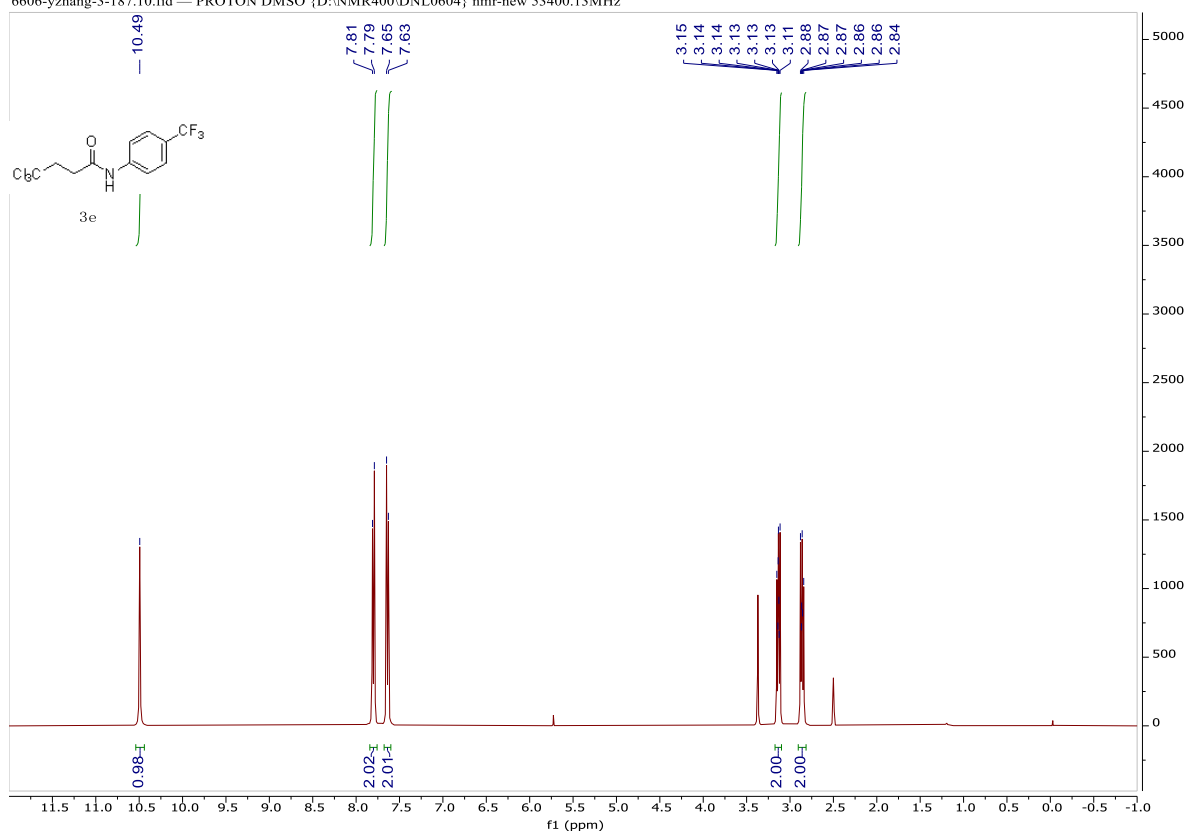

6606-yzhang-3-187.11.fid — C13CPD DMSO {D:\NMR400\DNL0604} nmr-new 53100.62MHz

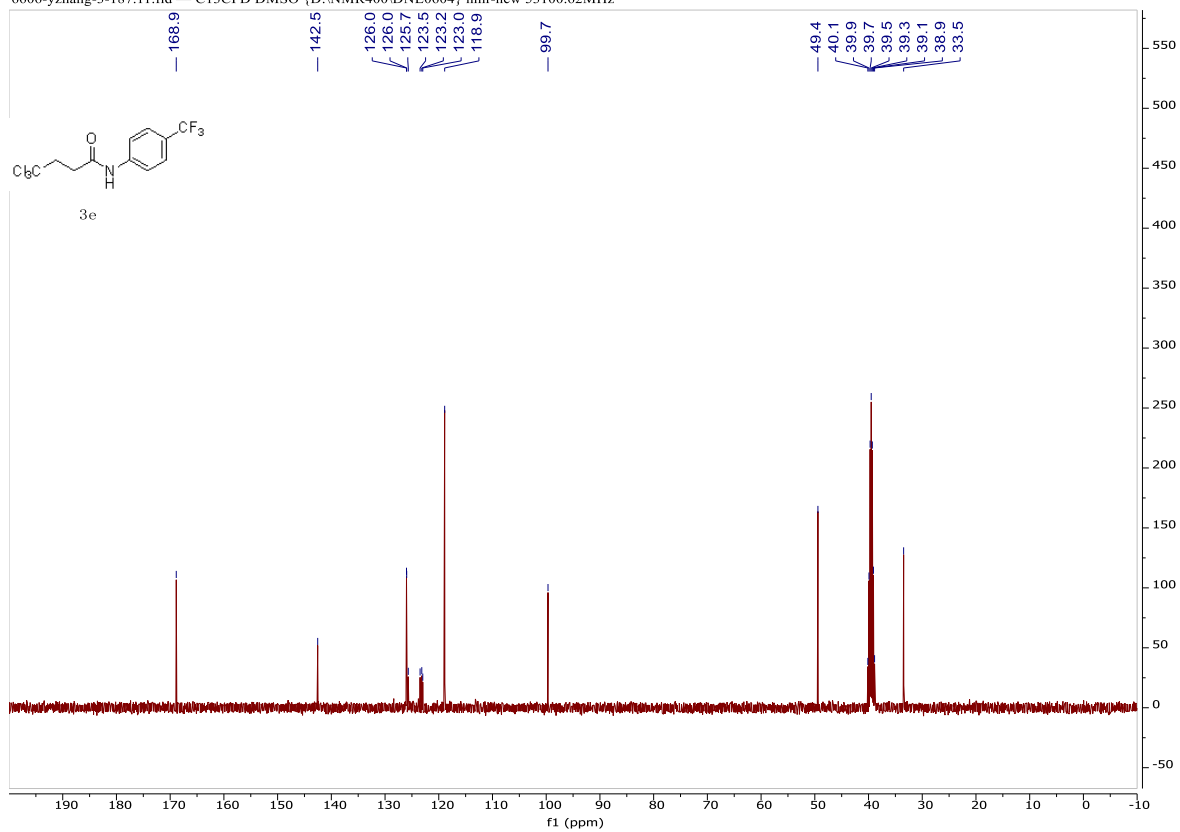

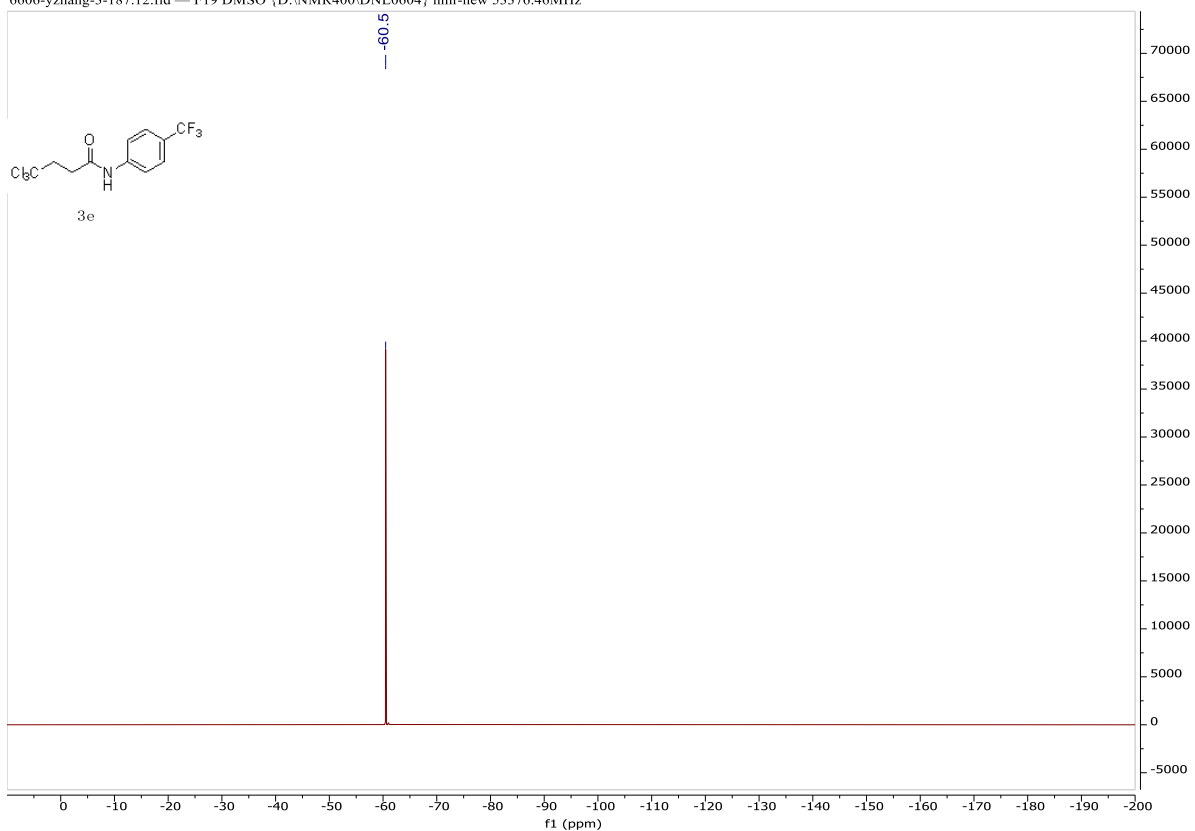

3f

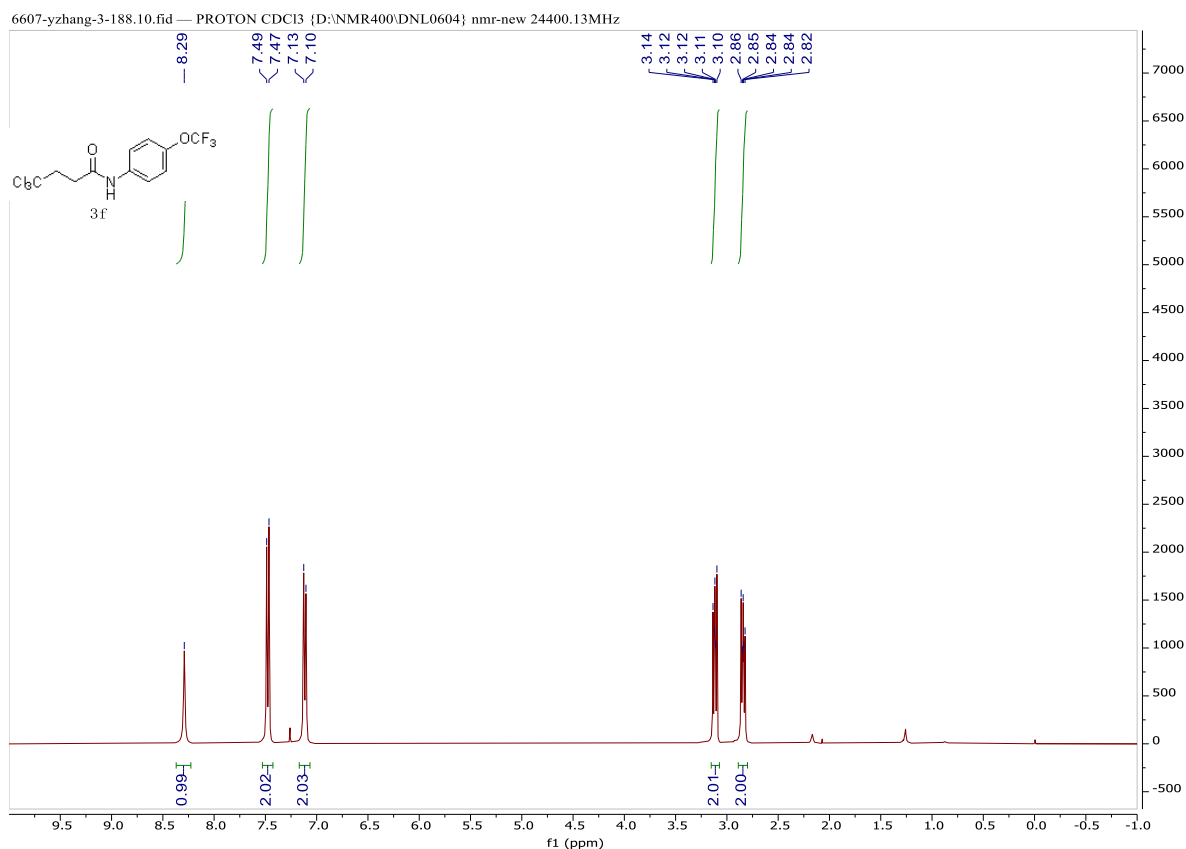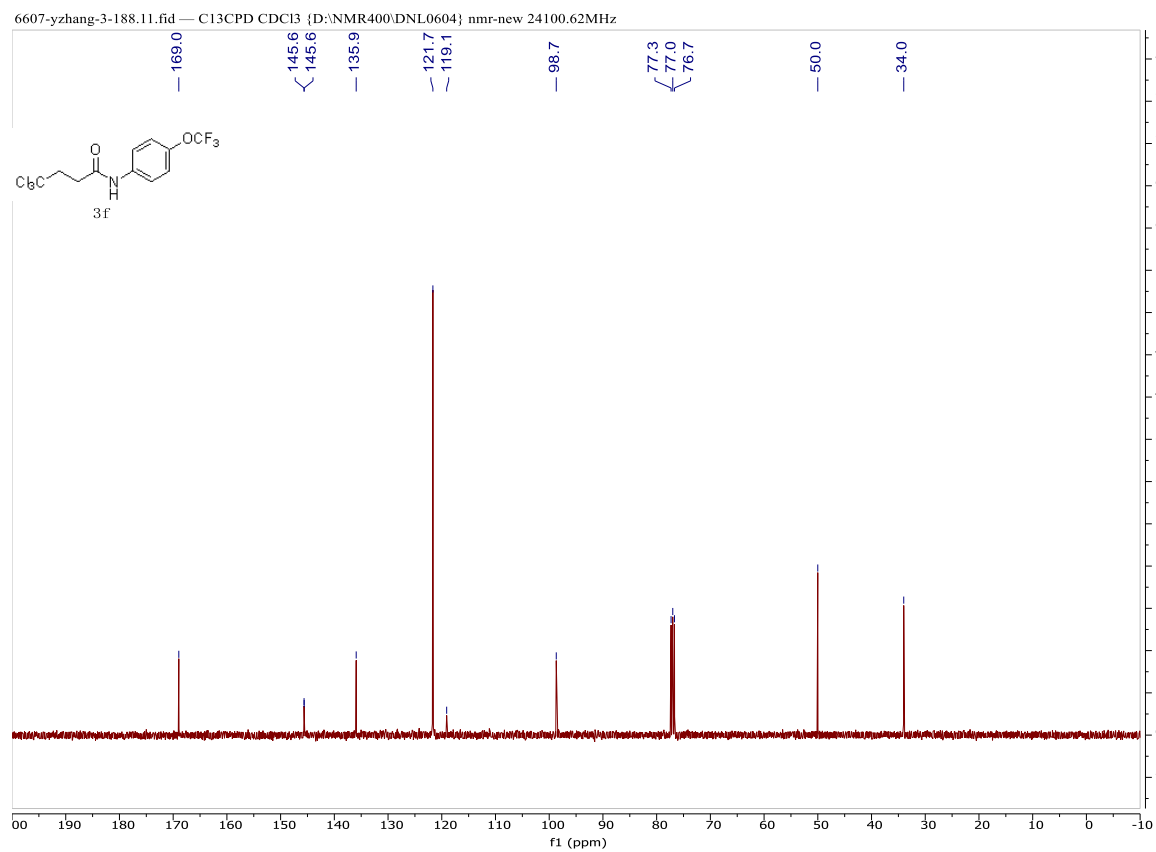



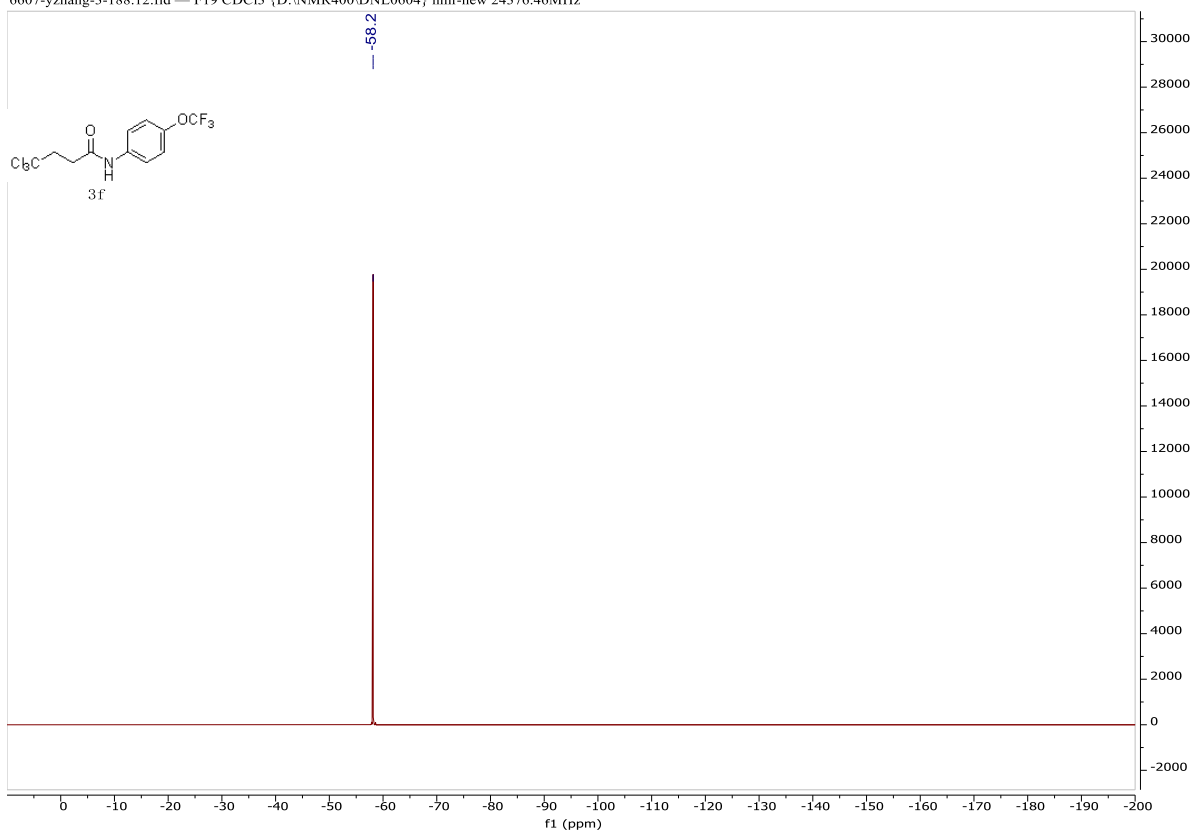

3g

6606-yzhang-3-183.10.fid — PROTON DMSO {D:\NMR400\DNL0604} nmr-new 52400.13MHz

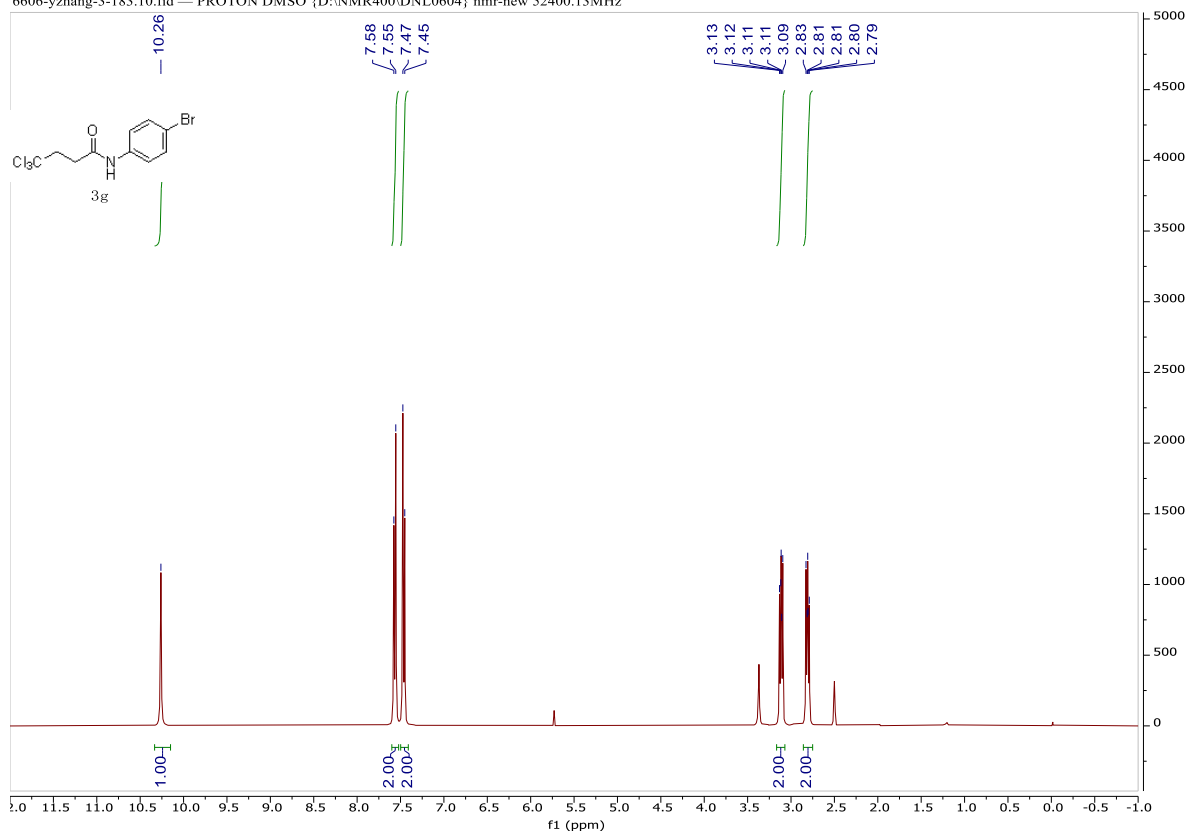

6606-yzhang-3-183.11.fid — C13CPD DMSO {D:\NMR400\DNL0604} nmr-new 52100.62MHz

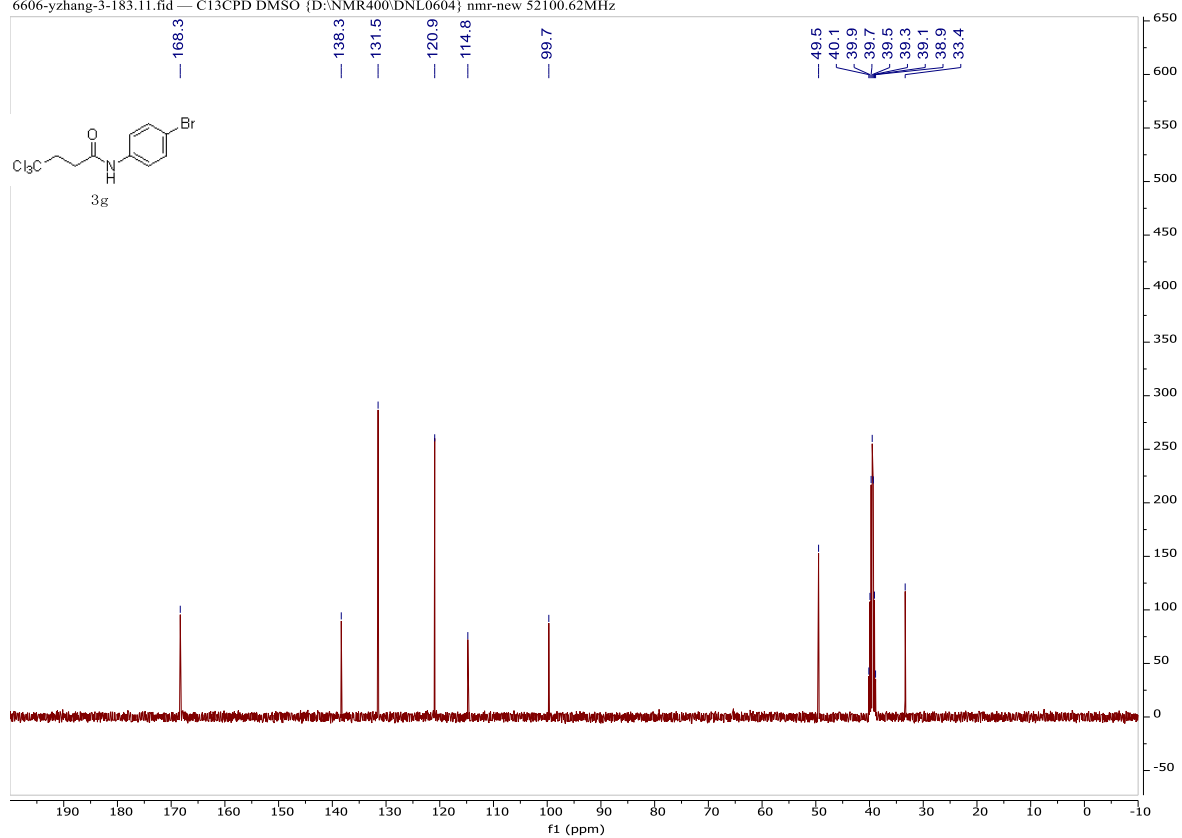

### 3h

6606-yzhang-3-189.10.fid — PROTON DMSO {D:\NMR400\DNL0604} nmr-new 54400.13MHz

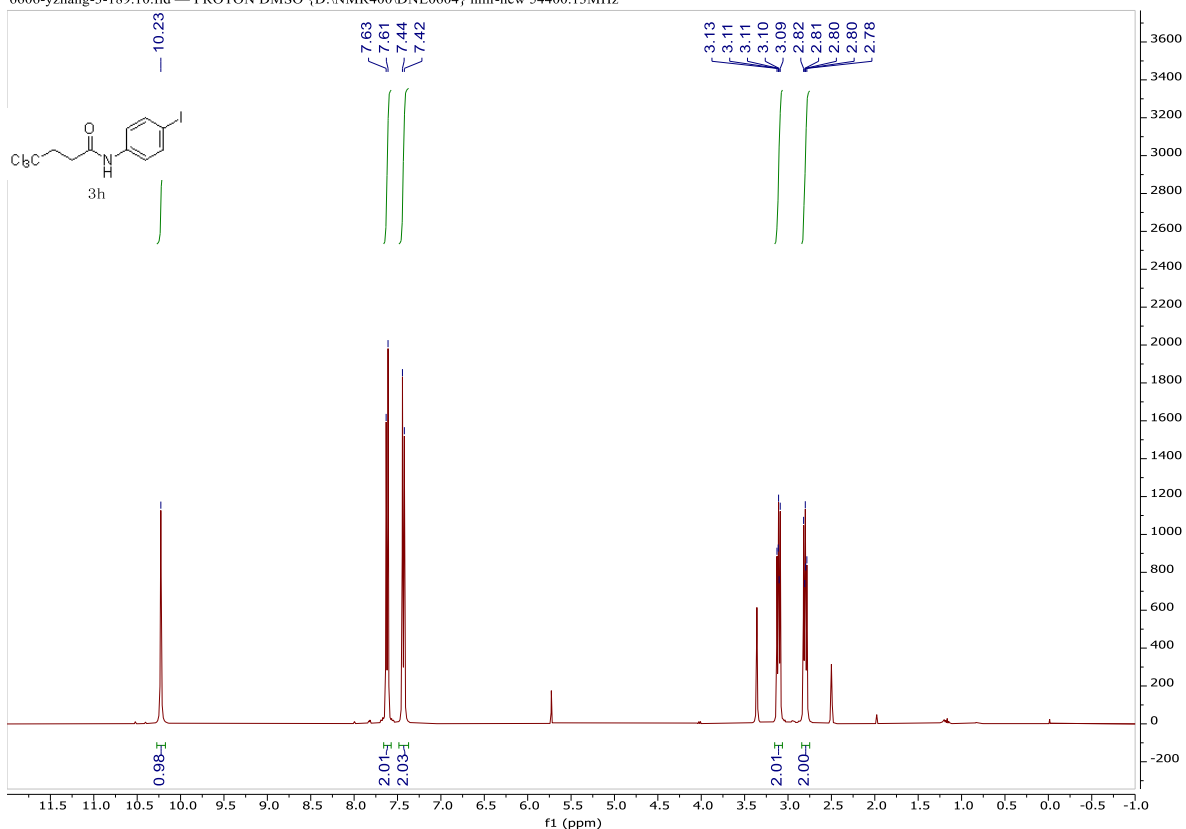

6606-yzhang-3-189.11.fid — C13CPD DMSO {D:\NMR400\DNL0604} nmr-new 54100.62MHz

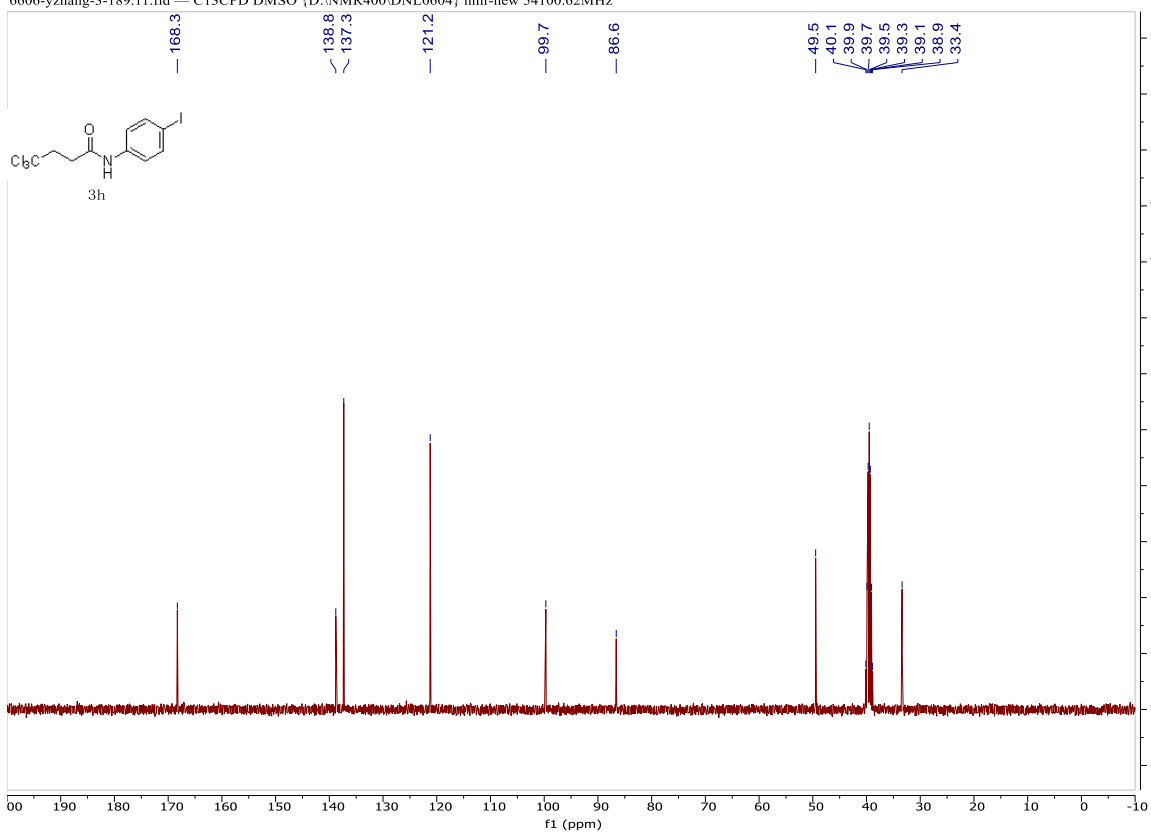

3i

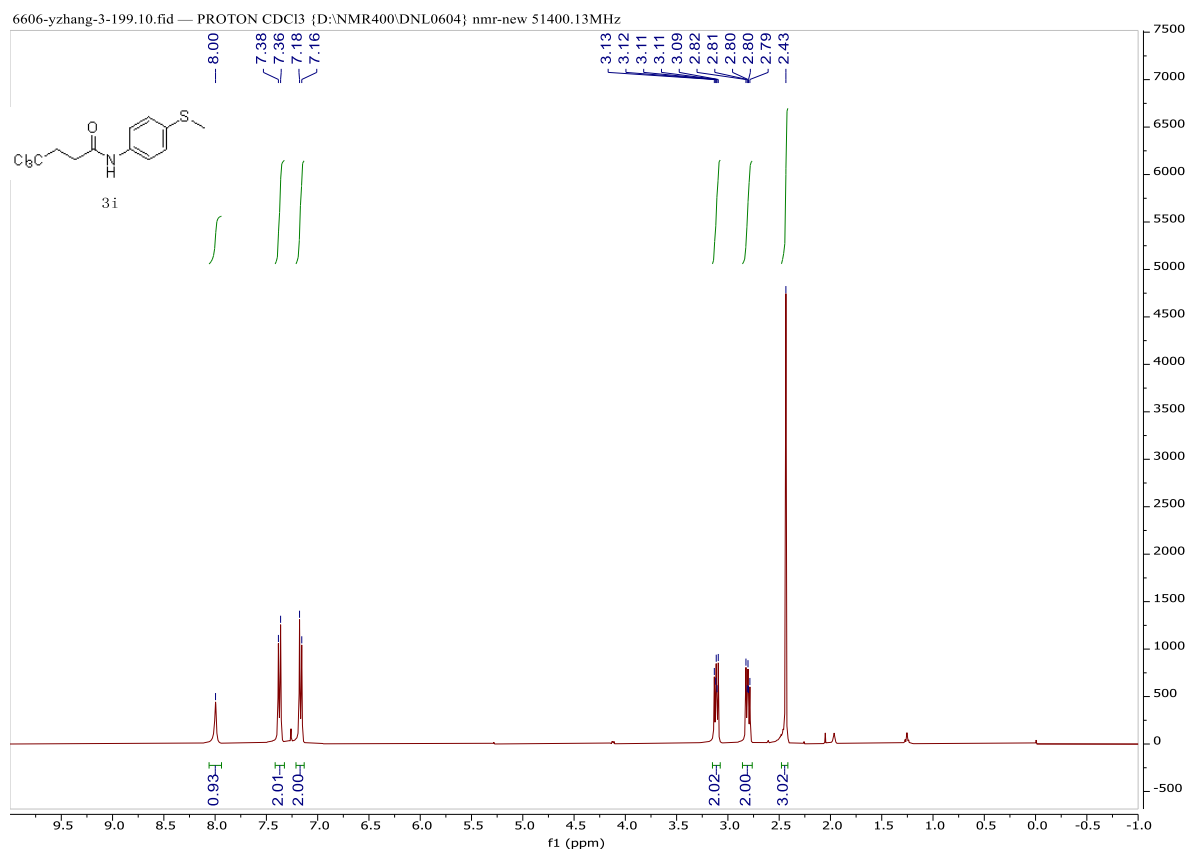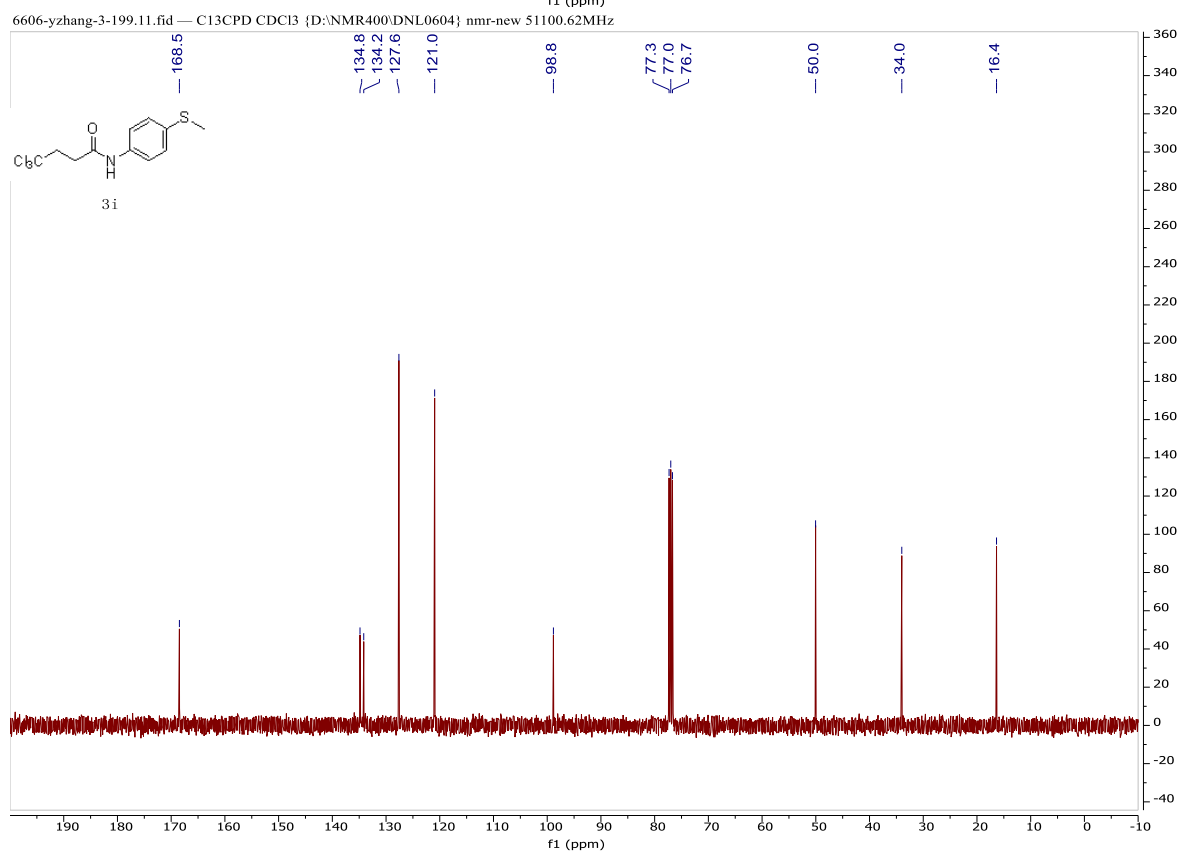

3j

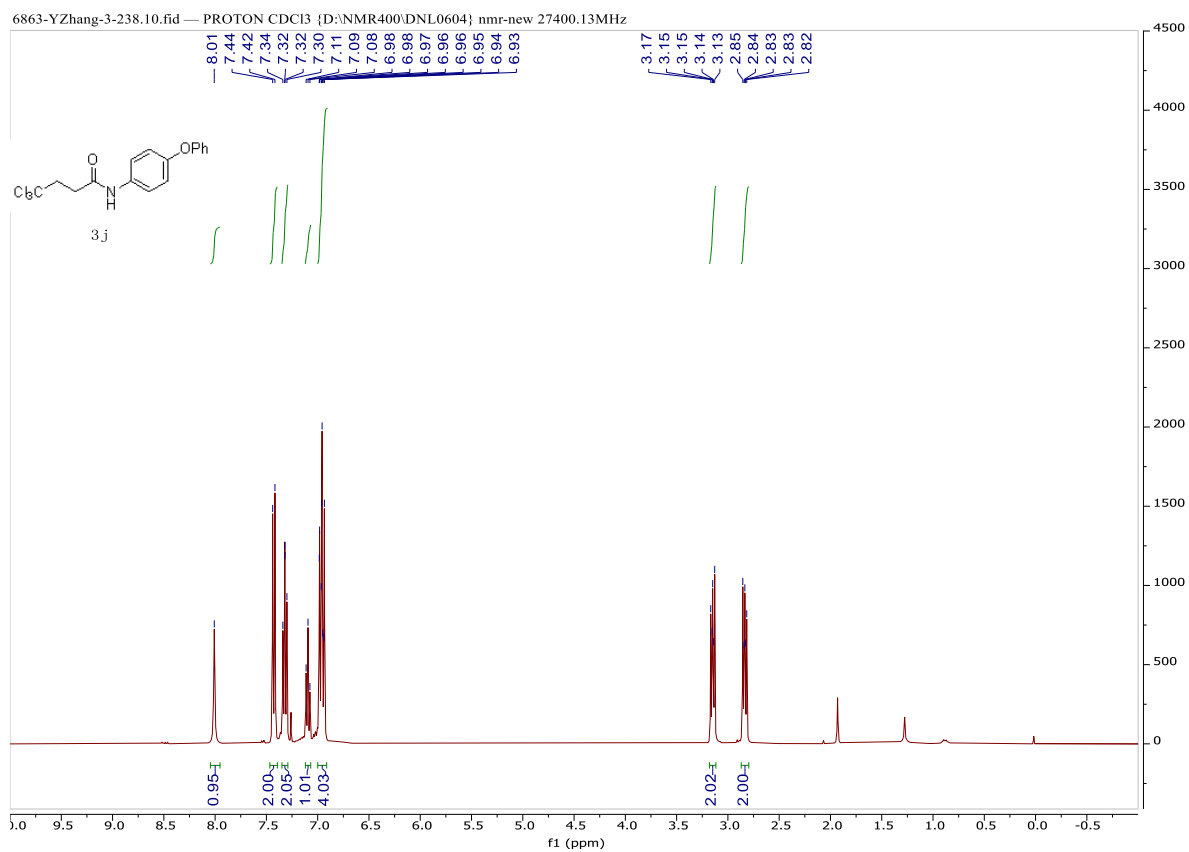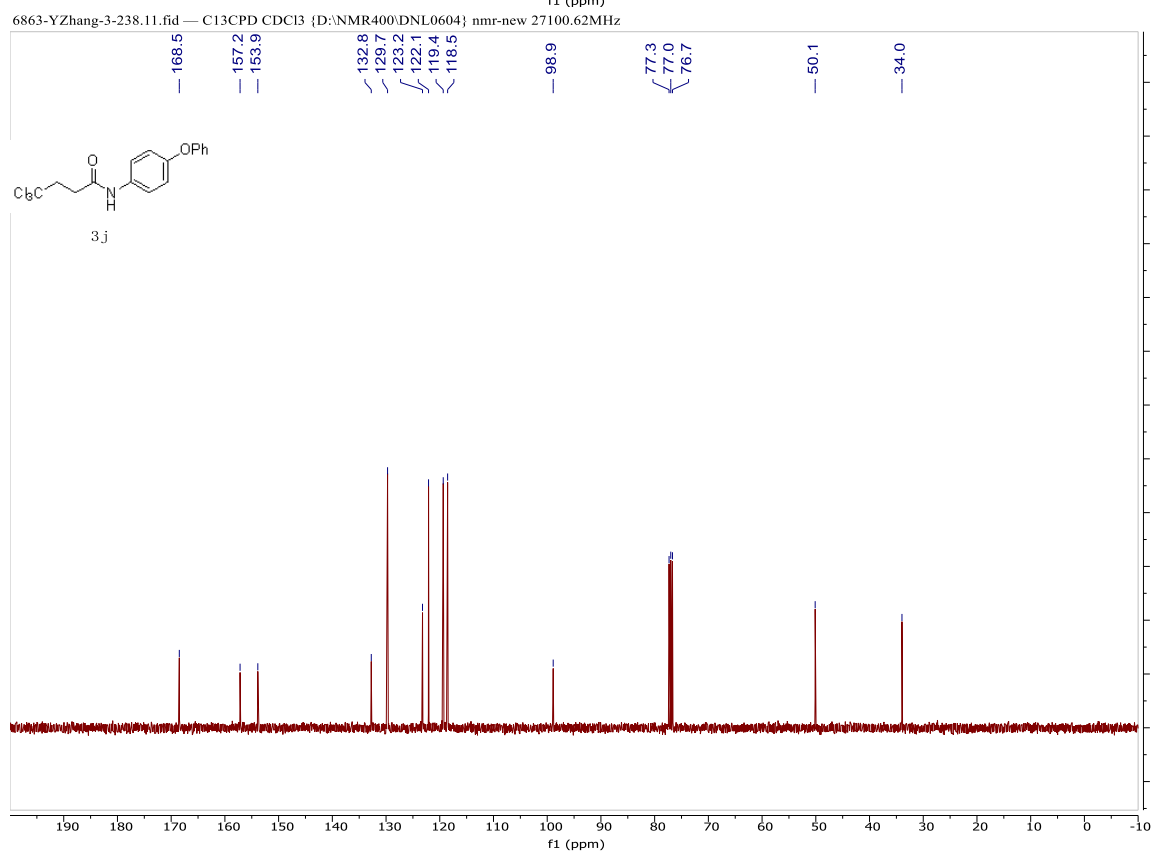

3k

6722-yzhang-3-205.10.fid — PROTON DMSO {D:\NMR400\DNL0604} nmr-new 41400.13MHz

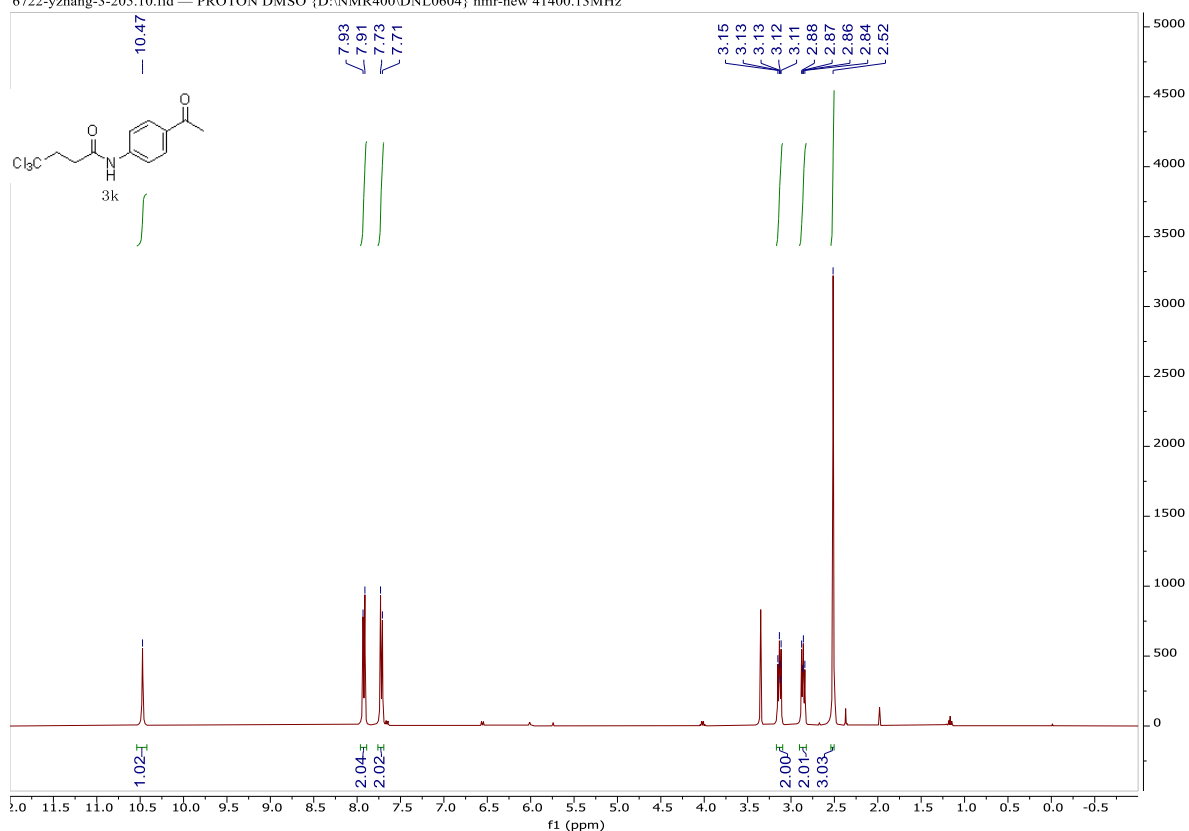

6722-yzhang-3-205.11.fid — C13CPD DMSO {D:\NMR400\DNL0604} nmr-new 41100.62MHz

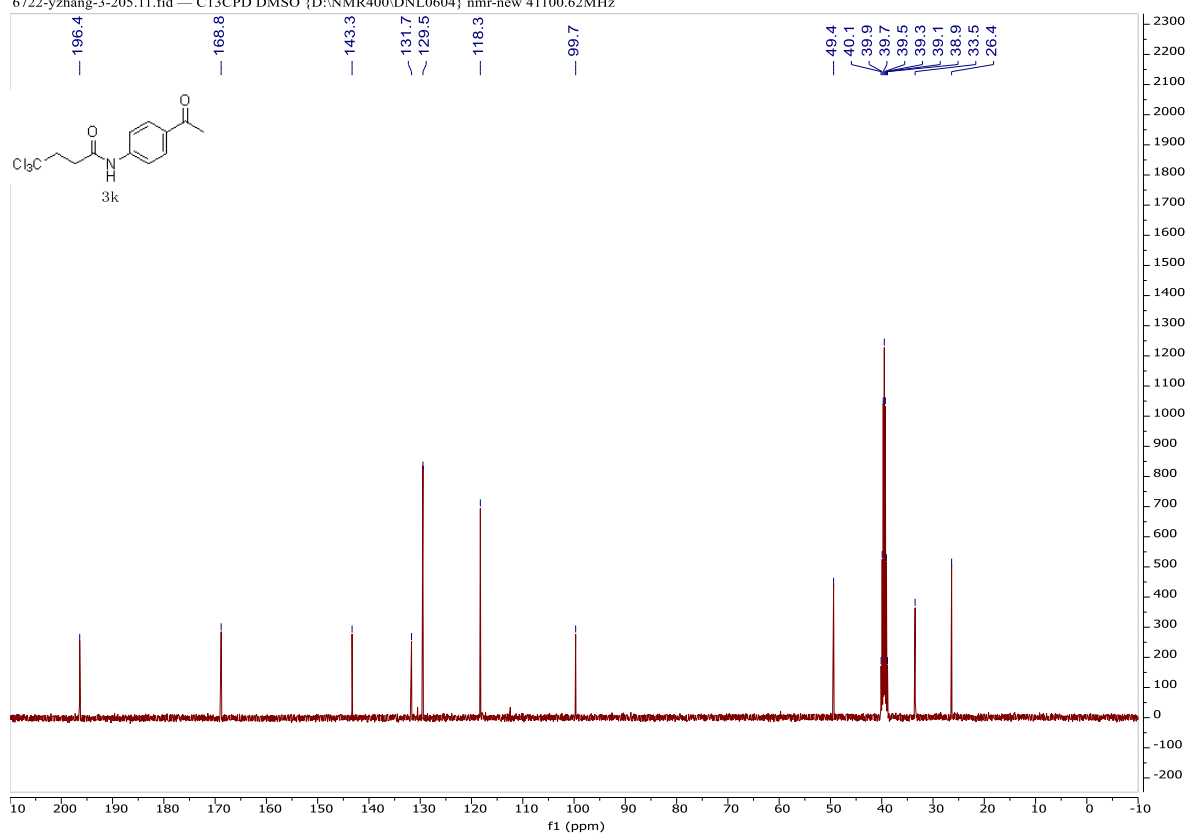

31

6705-YZhang-3-206.10.fid — PROTON DMSO {D:\NMR400\DNL0604} nmr-new 15400.13MHz

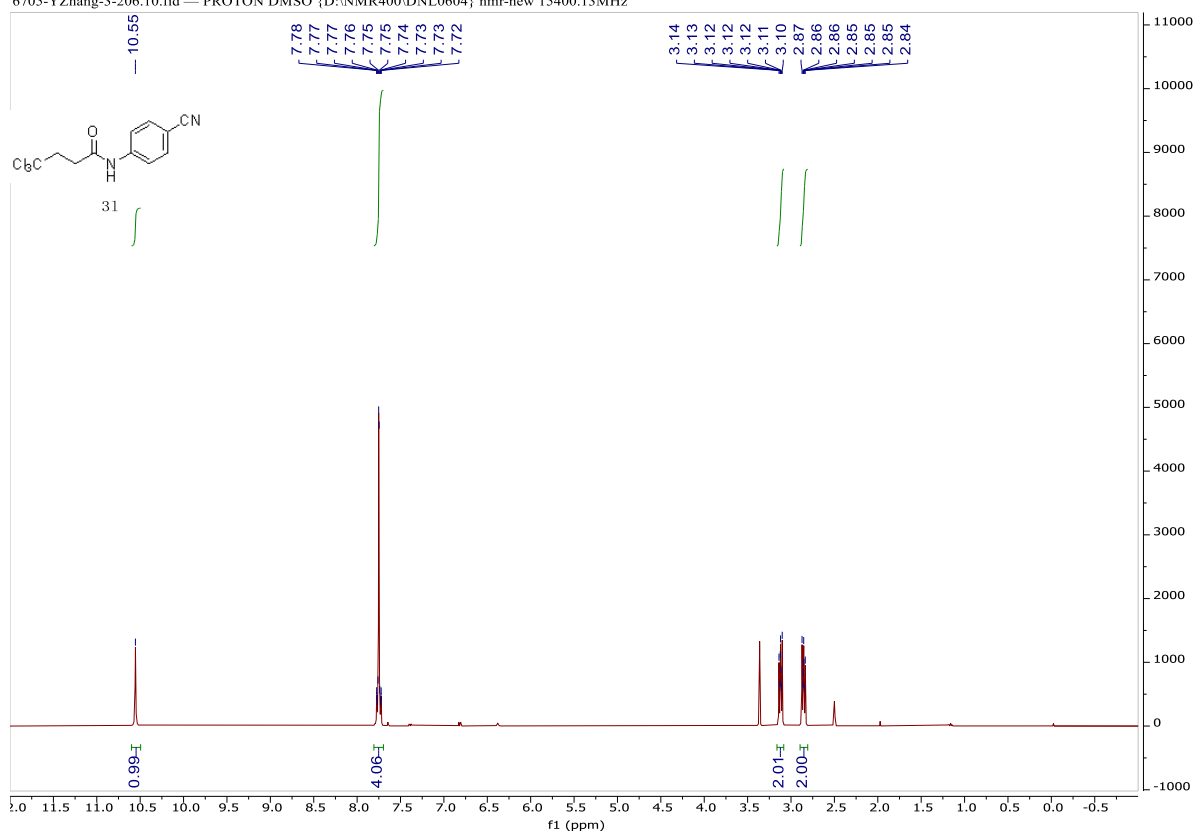

6705-YZhang-3-206.11.fid — C13CPD DMSO {D:\NMR400\DNL0604} nmr-new 15100.62MHz

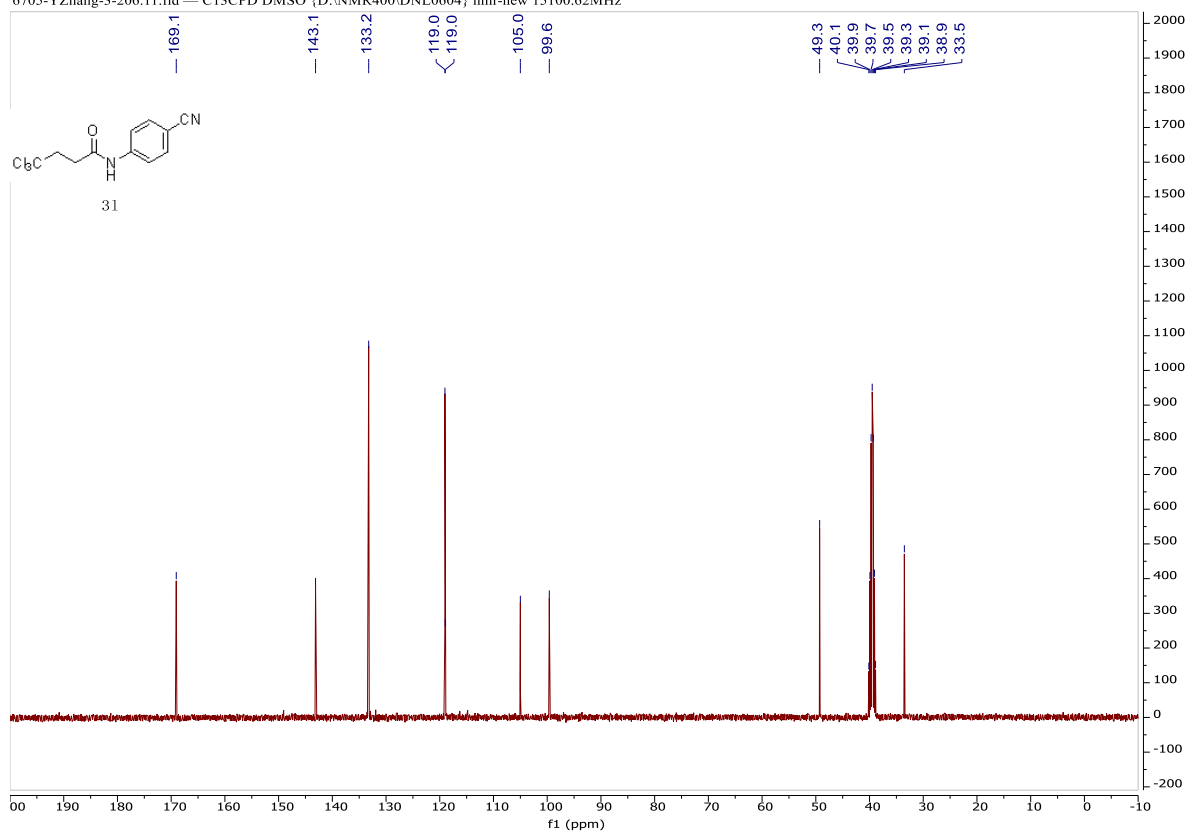

3m

6750-YZHANG-3-185-10.fid — PROTON DMSO {D:\NMR400\DNL0604} nmr-new 17400.13MHz

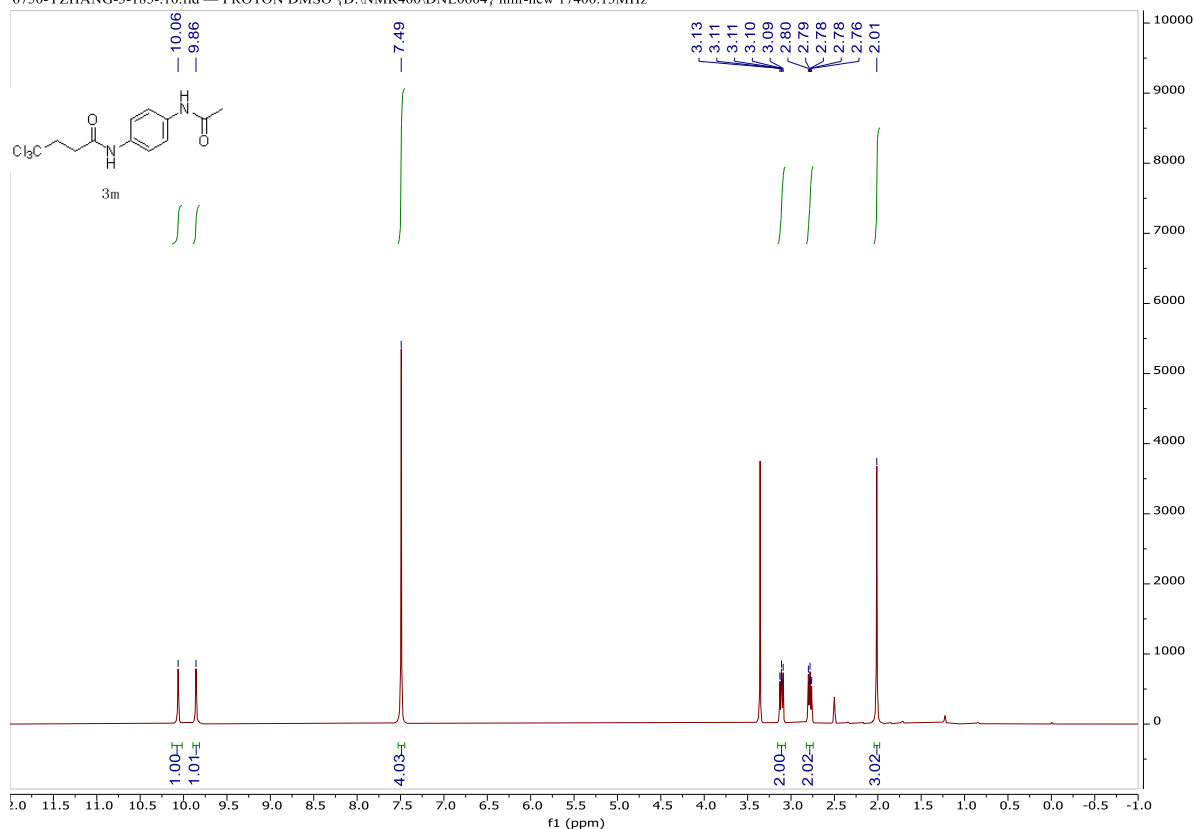

6750-YZHANG-3-185-11.fid — C13CPD DMSO {D:\NMR400\DNL0604} nmr-new 17100.62MHz

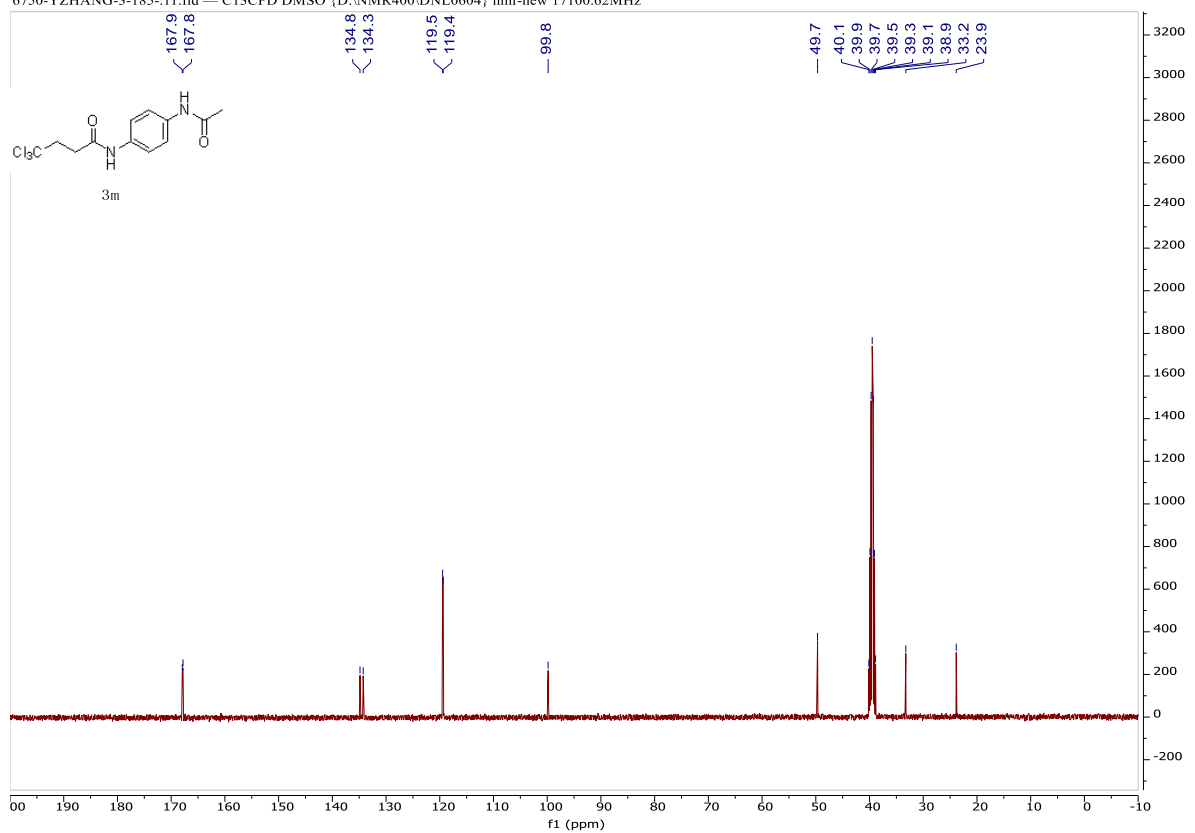



3n

7002-YZhang-3-258.10.fid — PROTON CDCl3 {D2:NMR400\DNL0604} nmr-new 46400.13MHz

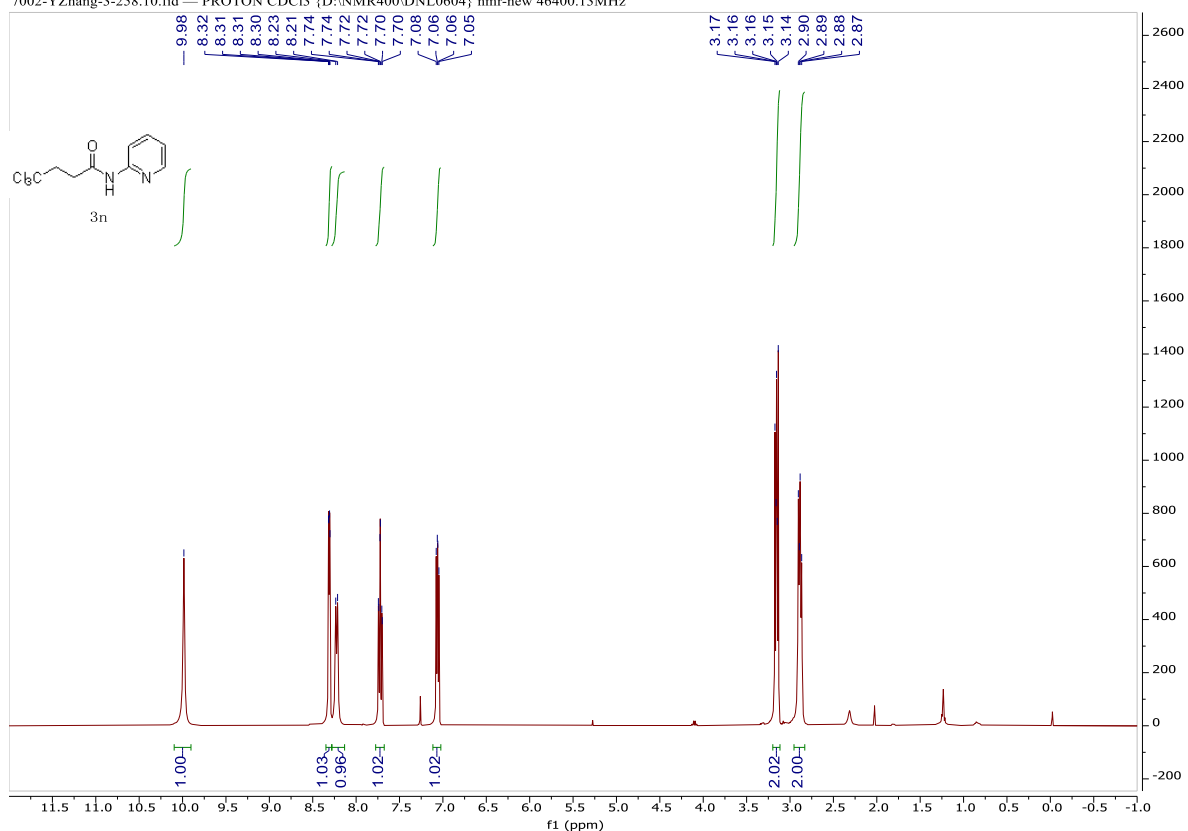

7002-YZhang-3-258.11.fid — C13CPD CDCl3 {D2:NMR400\DNL0604} nmr-new 46100.62MHz

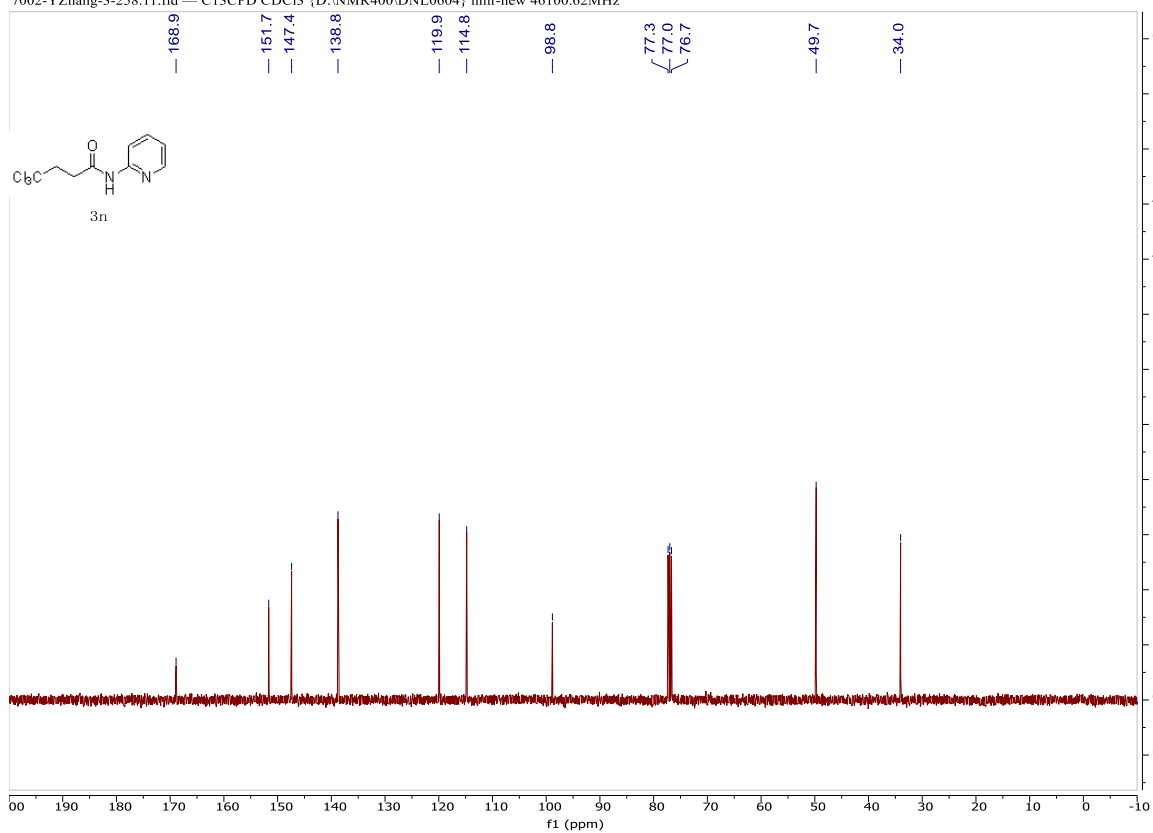

30

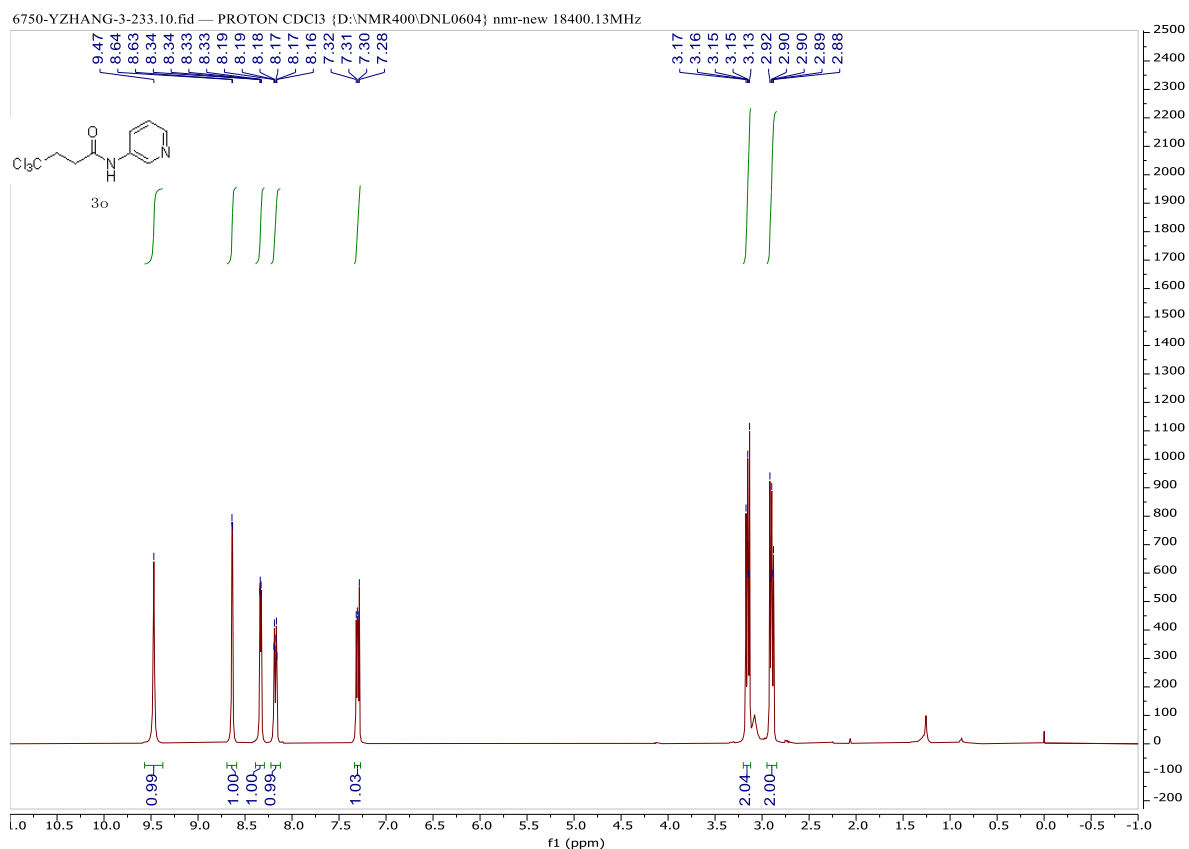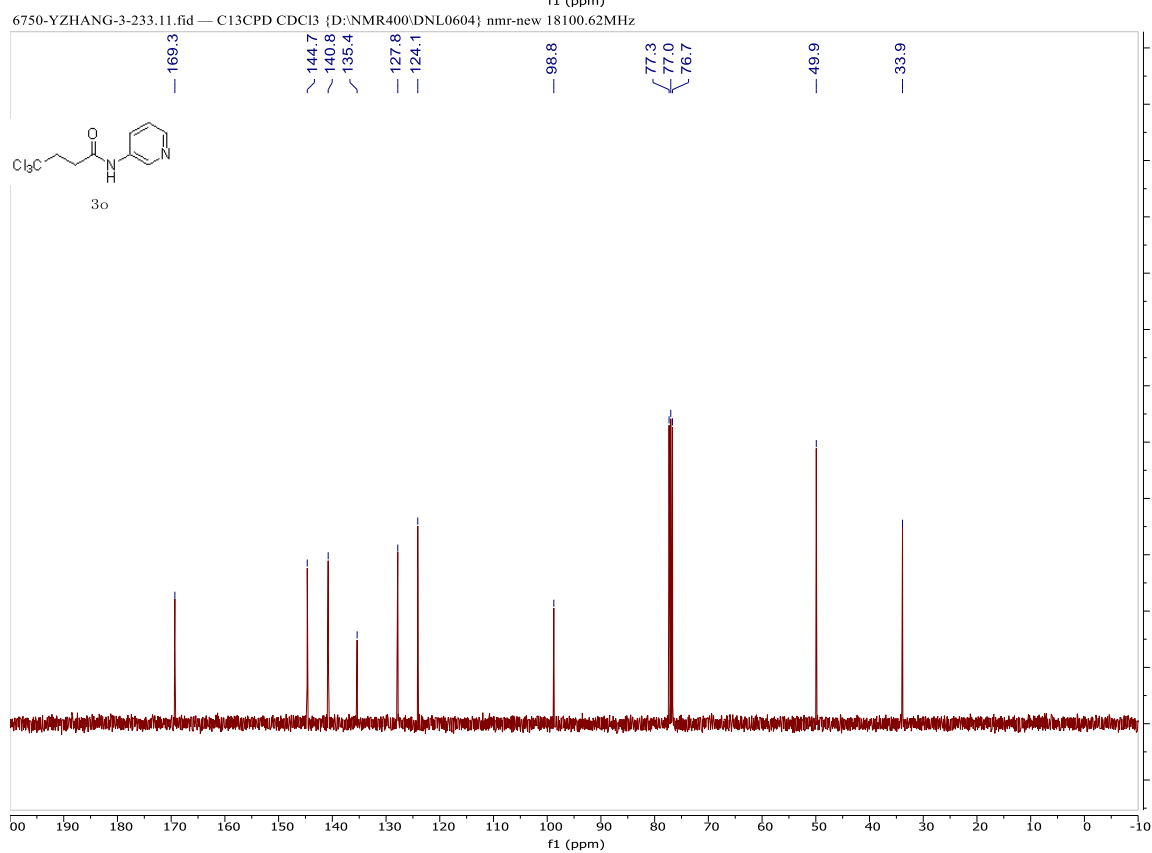

3p

6519-YZHANG-3-182.10.fid — PROTON CDCI3 {D:\NMR400\DNL0604} nmr-new 36400.13MHz

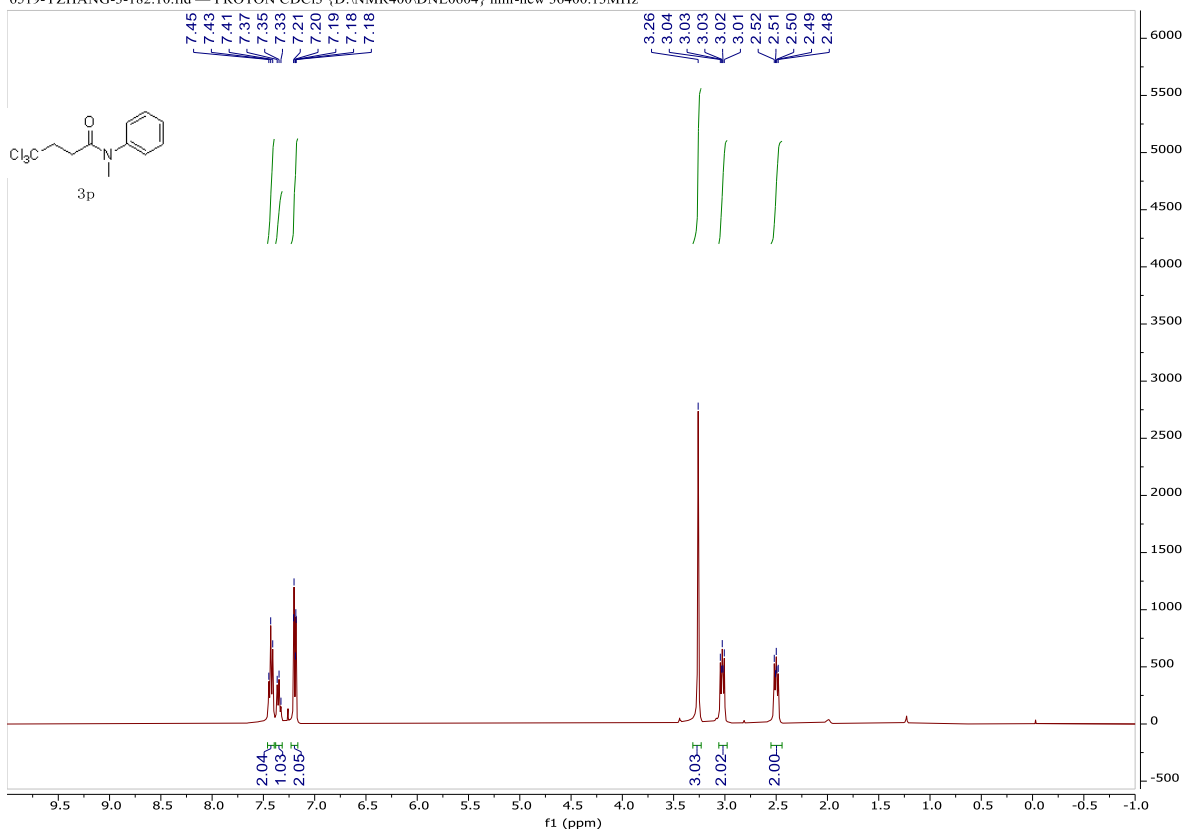

6519-YZHANG-3-182.11.fid — C13CPD CDCI3 {D:\NMR400\DNL0604} nmr-new 36100.62MHz

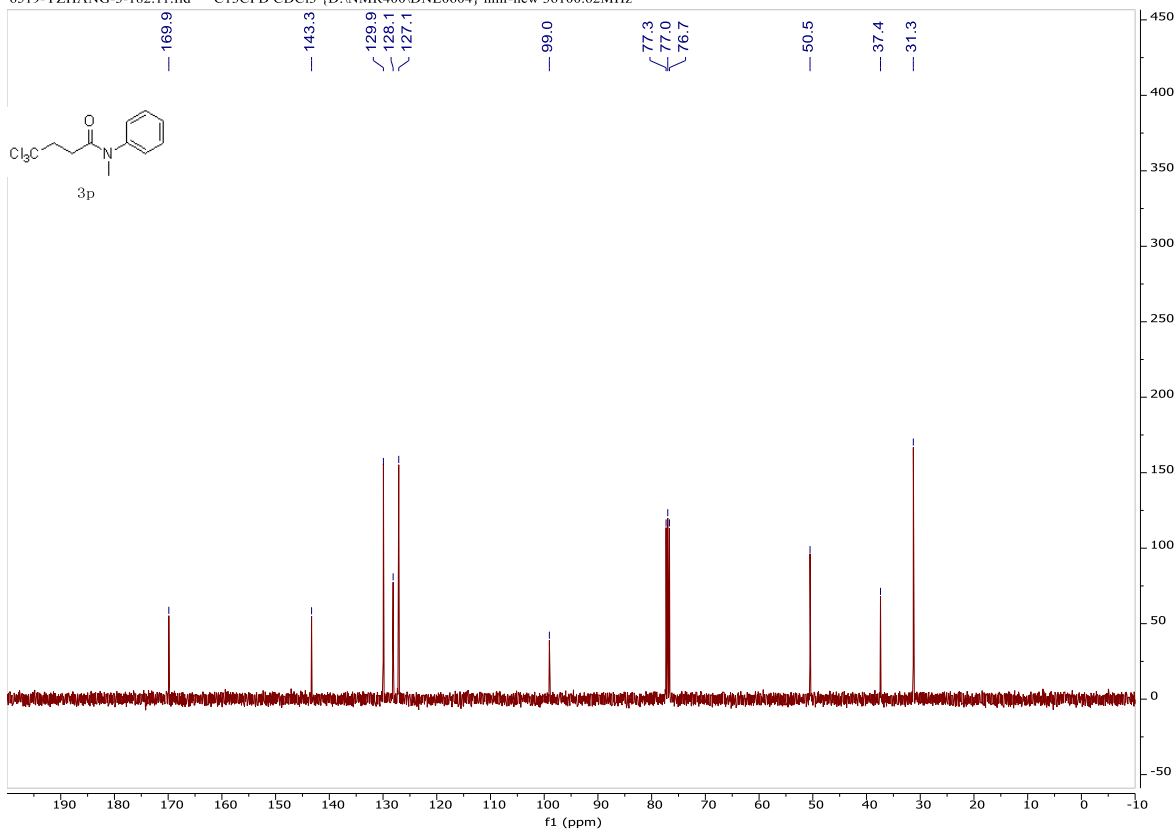

3q

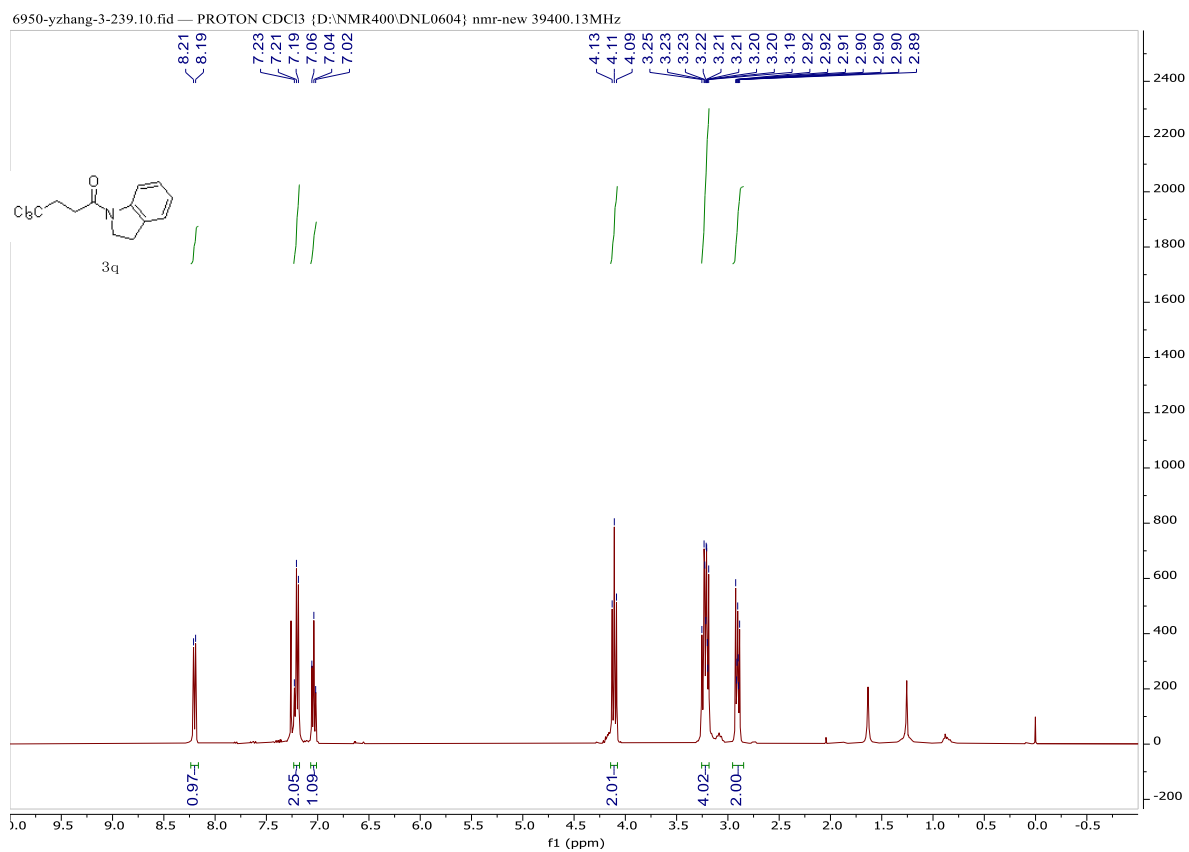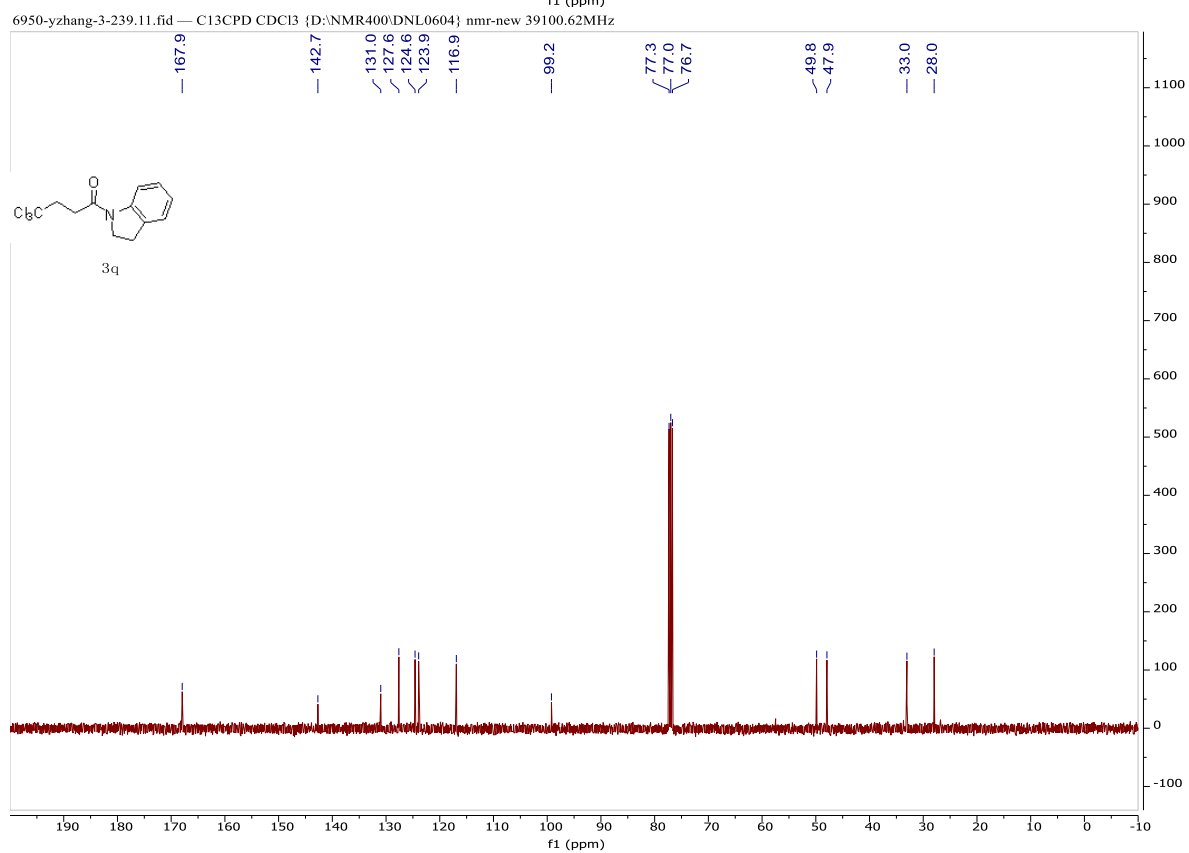

3r

6256-YZhang-0-3-134.10.fid — PROTON CDC13 {D:\NMR400\DNL0604} nmr-new 24400.13MHz

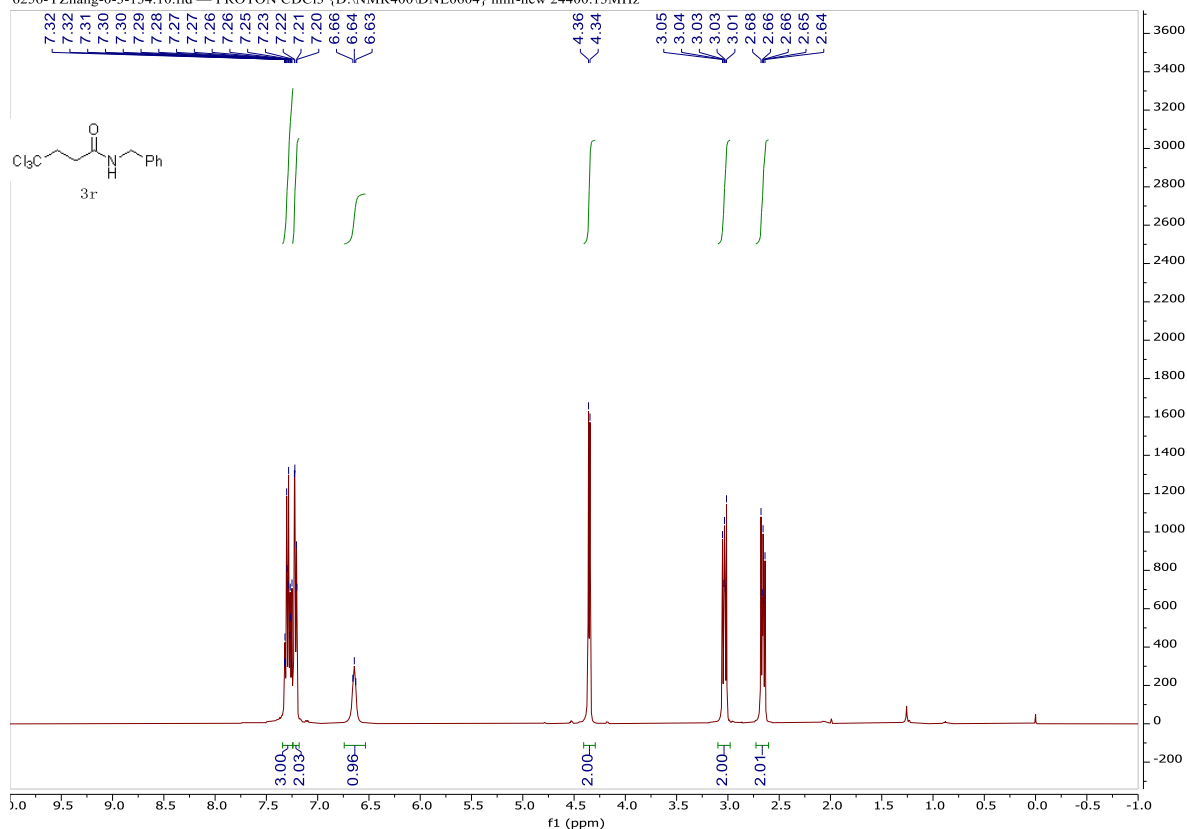

6256-YZhang-0-3-134.11.fid — C13CPD CDC13 {D:\NMR400\DNL0604} nmr-new 24100.62MHz

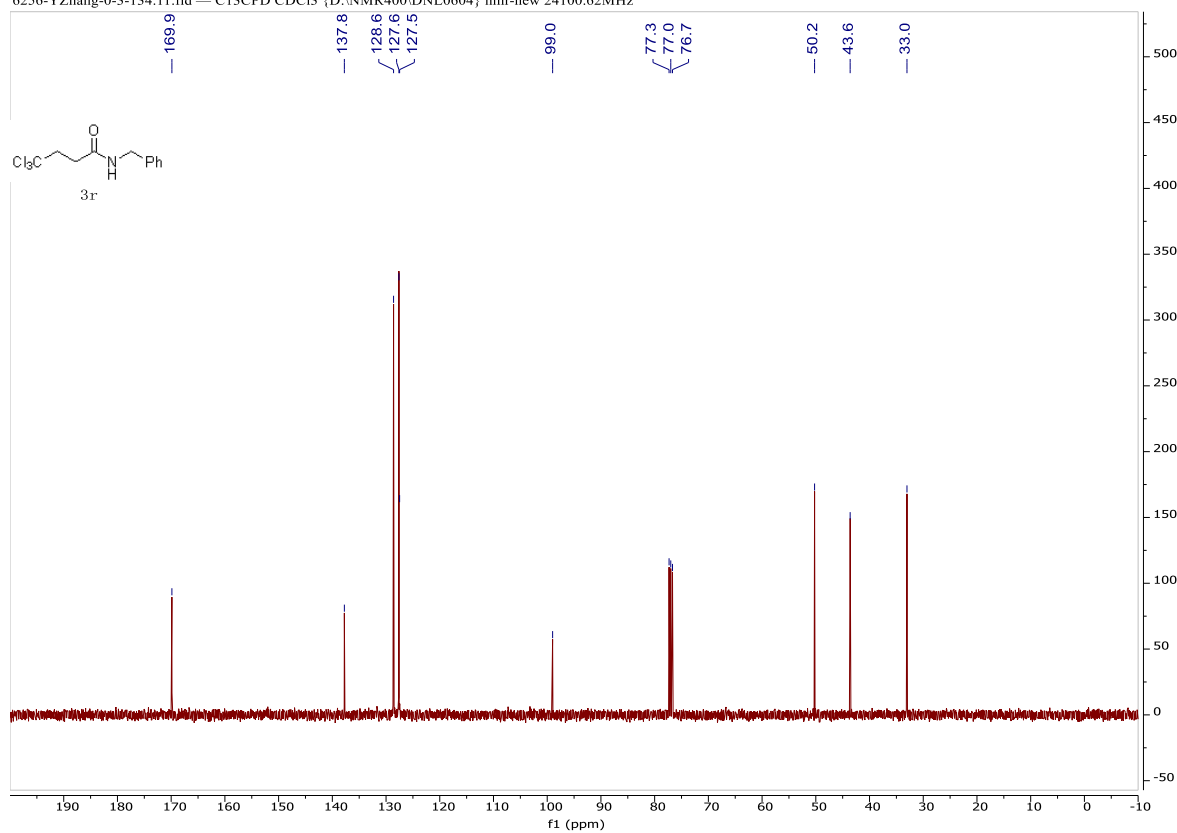

3s

7402-yzhang-3-317.10.fid — PROTON CDCl3 {D:\NMR400\DNL0604} nmr-new 32400.13MHz

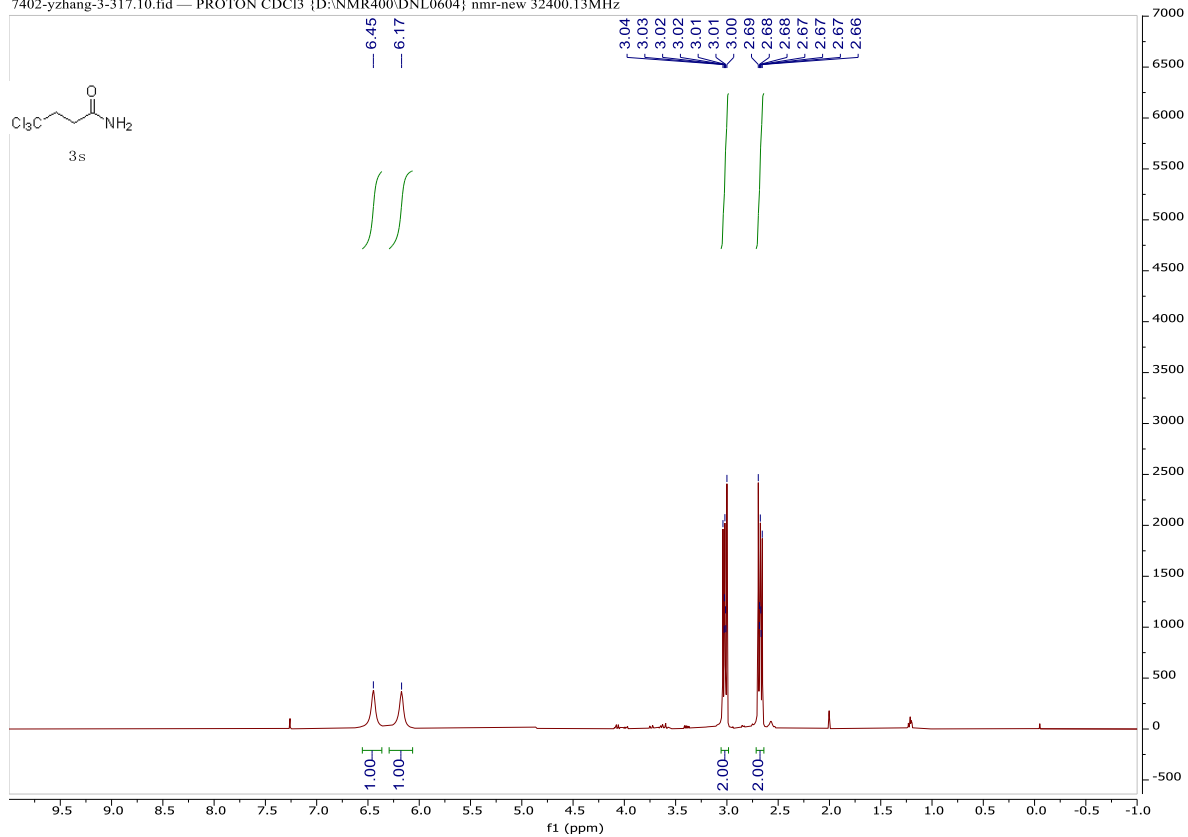

7402-yzhang-3-317.11.fid — C13CPD CDCl3 {D:\NMR400\DNL0604} nmr-new 32100.62MHz

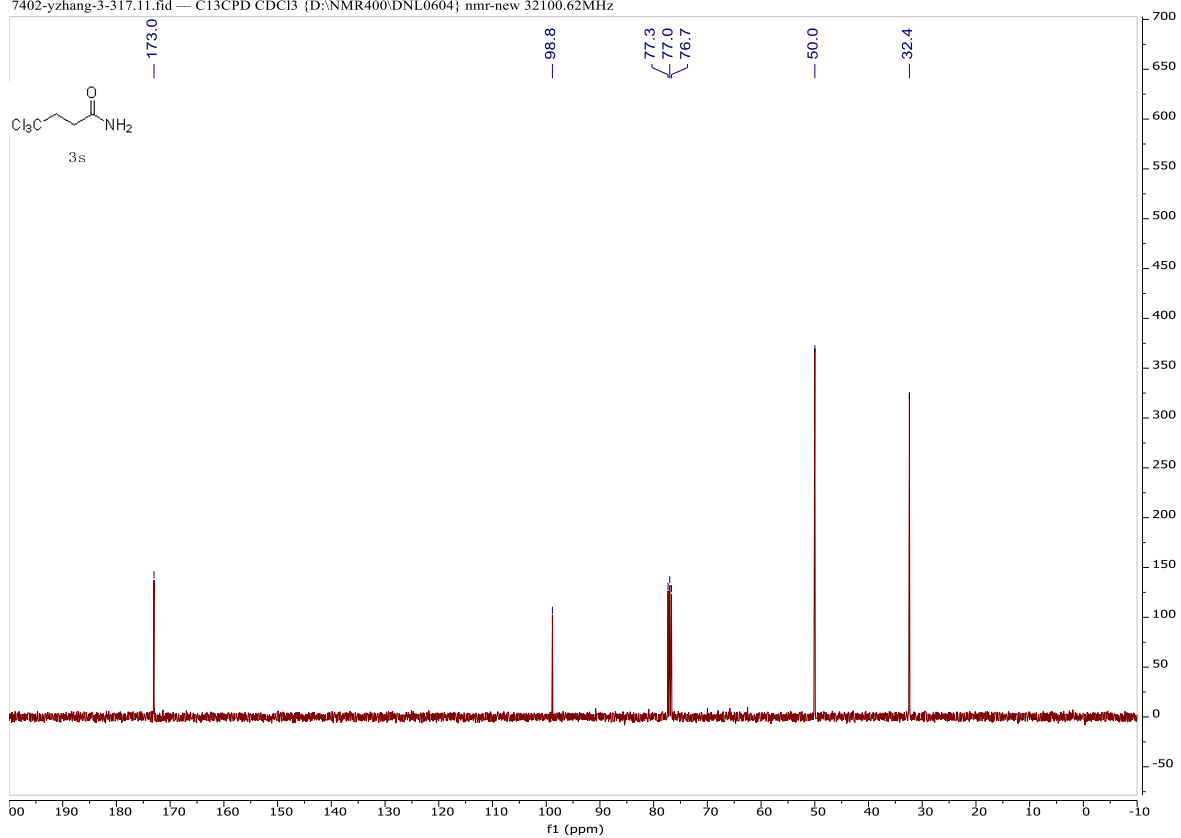

4a

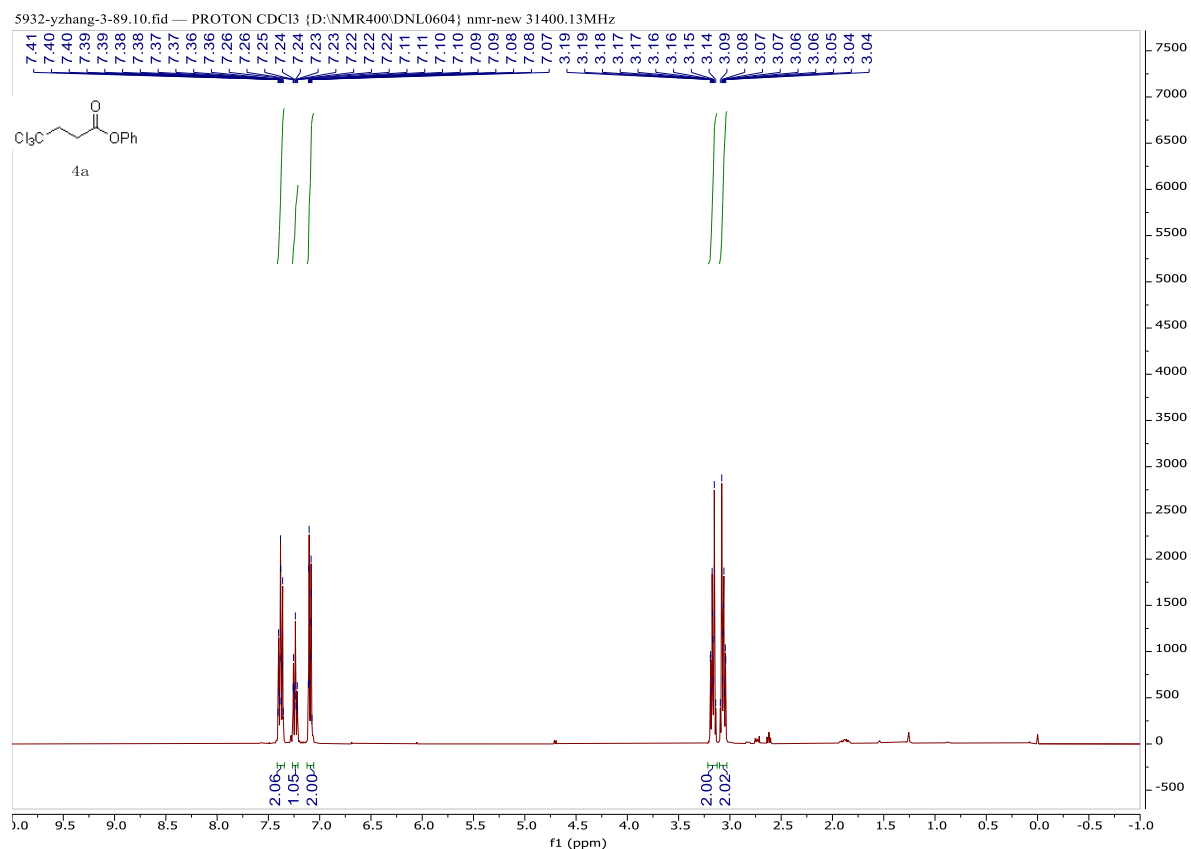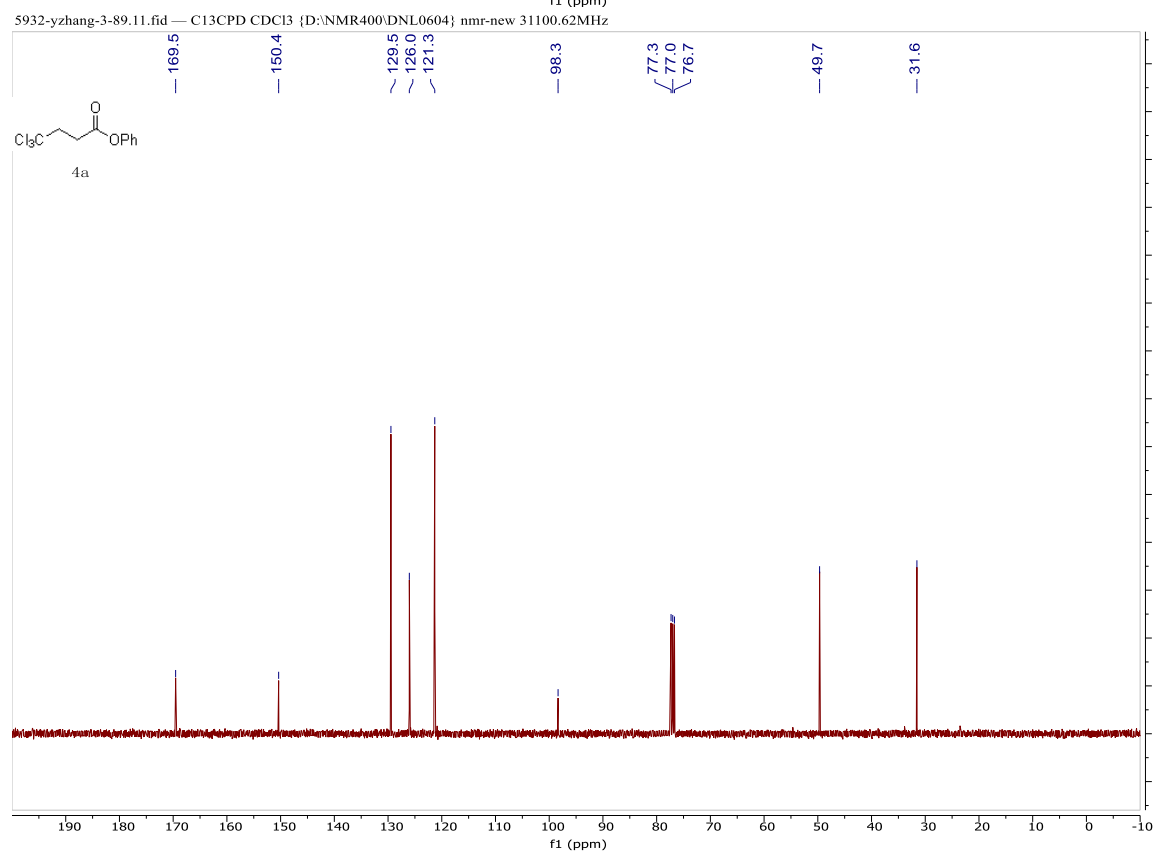

4b

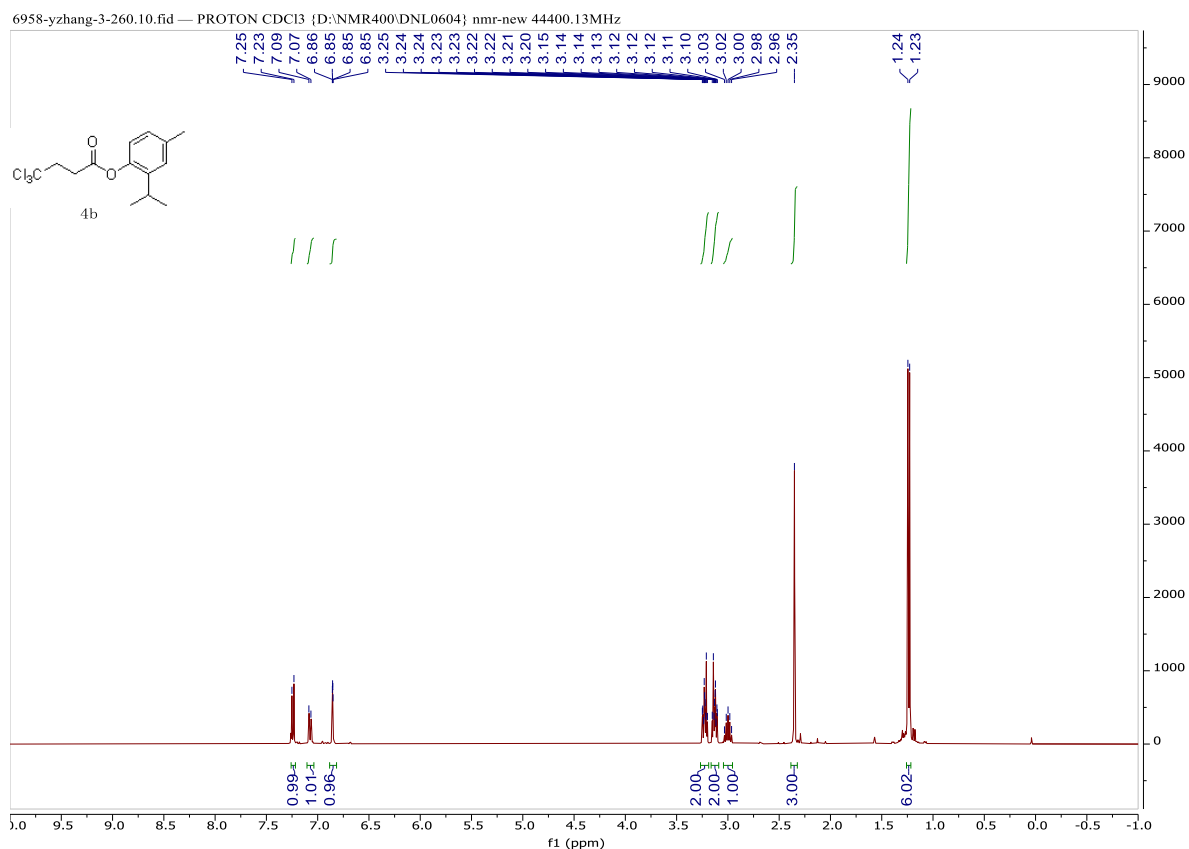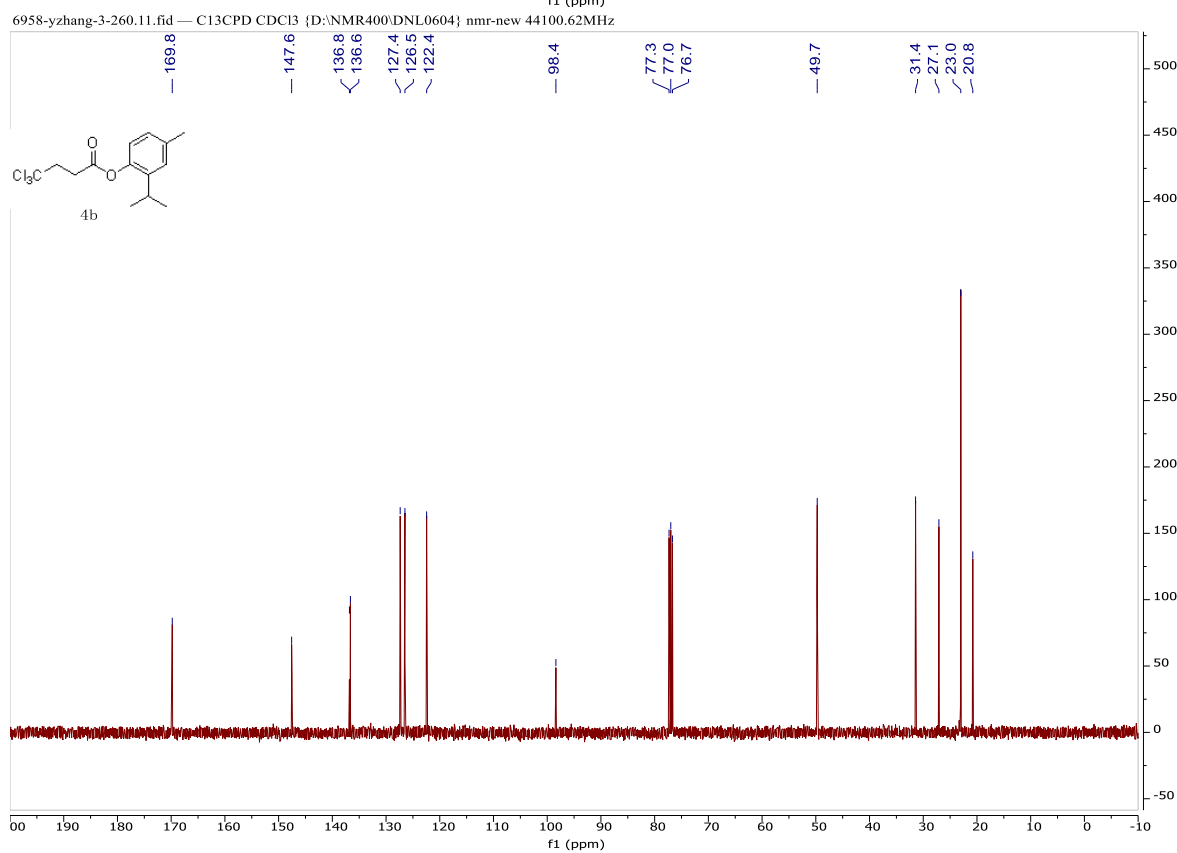



4c

6705-YZhang-3-179b.10.fid — PROTON CDCl3 {D:\NMR400\DNL0604} nmr-new 14400.13MHz

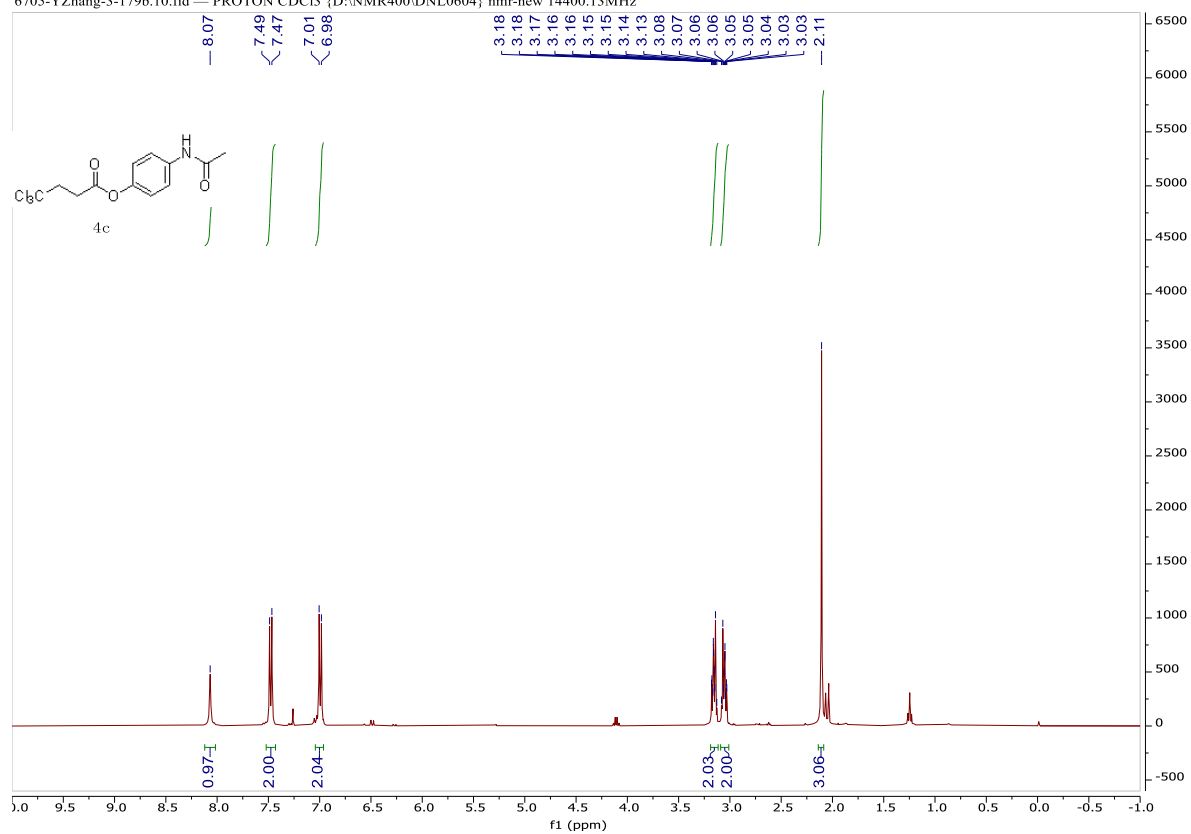

6705-YZhang-3-179b.11.fid — C13CPD CDCl3 {D:\NMR400\DNL0604} nmr-new 14100.62MHz

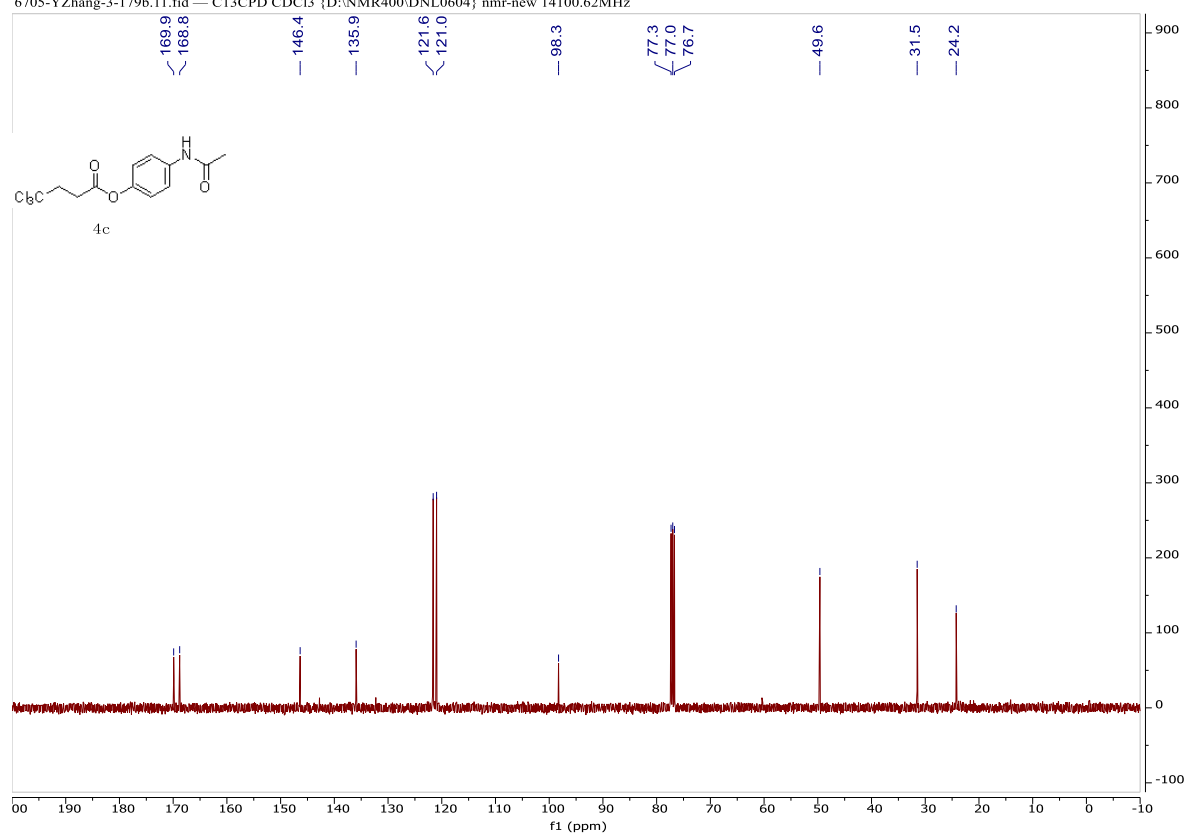

4d

6892-yZhang-3-254.10.fid — PROTON DMSO {D:\NMR400\DNL0604} nmr-new 41400.13MHz

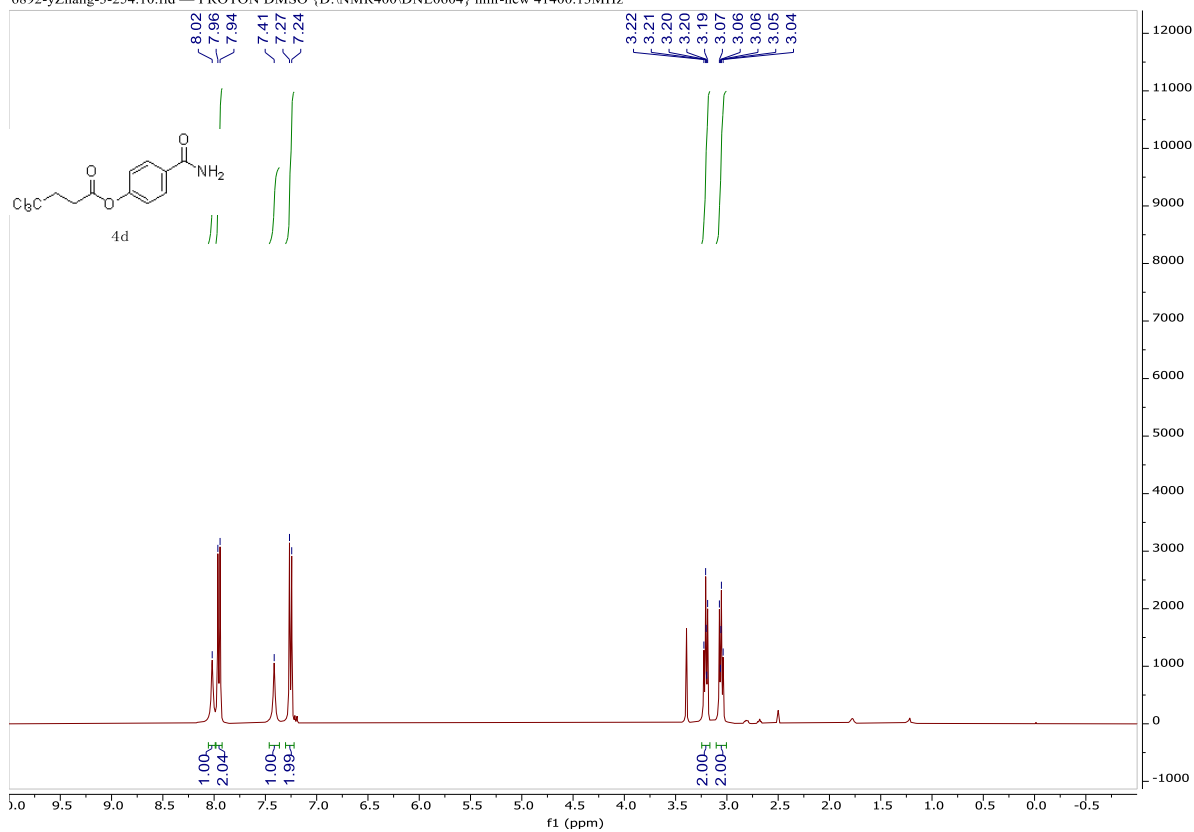

6892-yZhang-3-254.11.fid — C13CPD DMSO {D:\NMR400\DNL0604} nmr-new 41100.62MHz

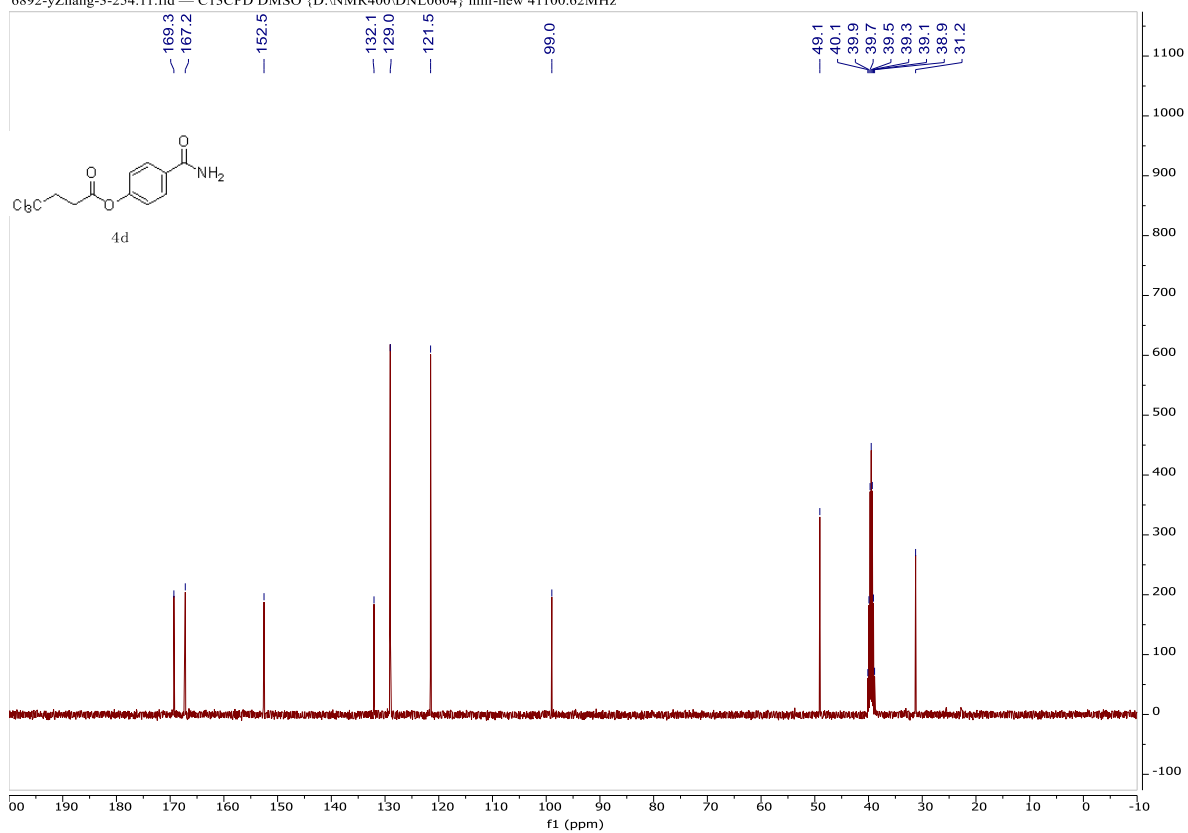

4e

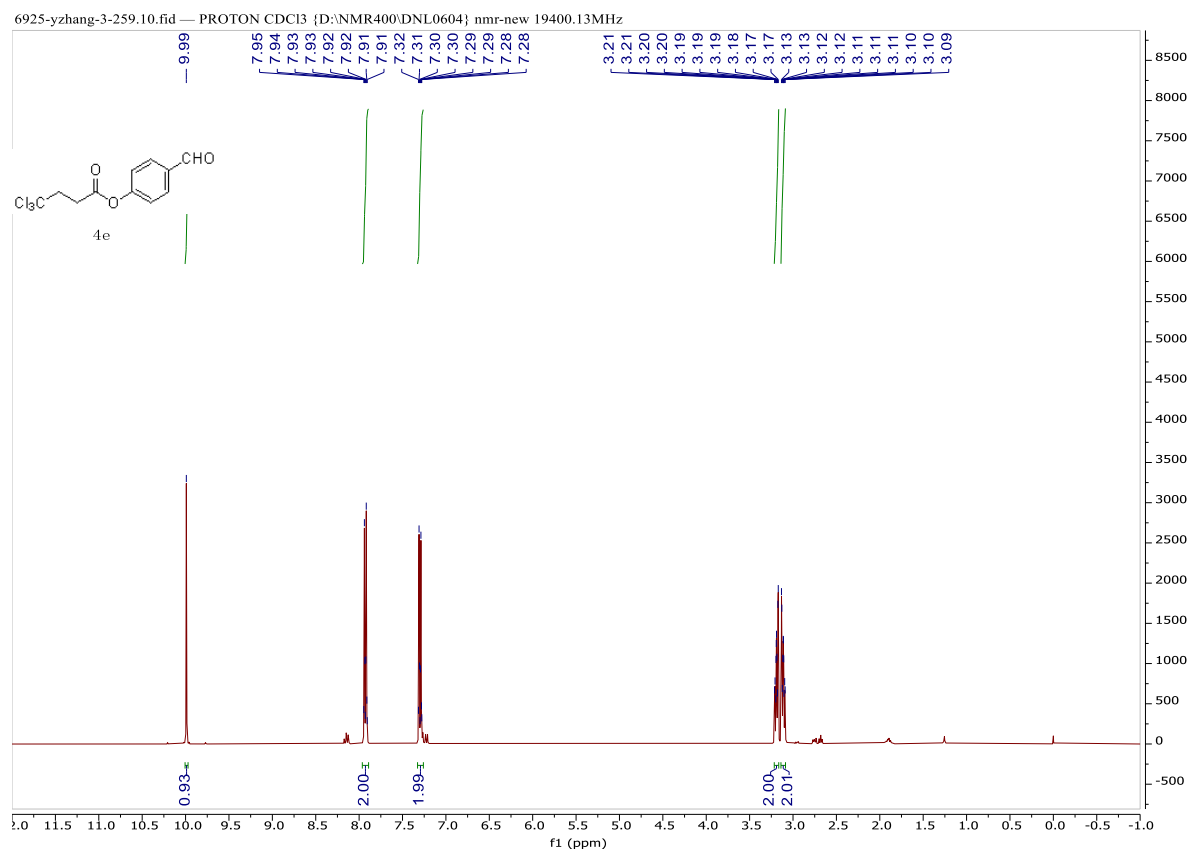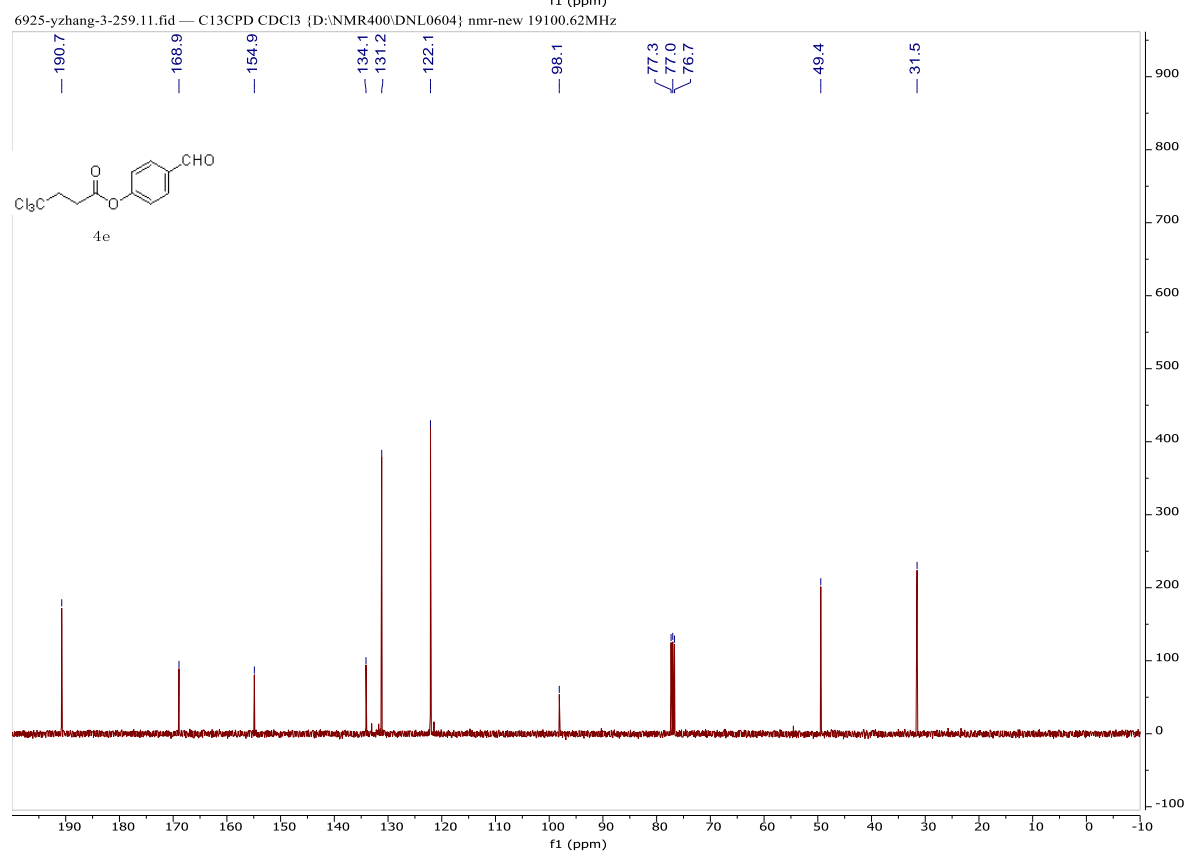

4f

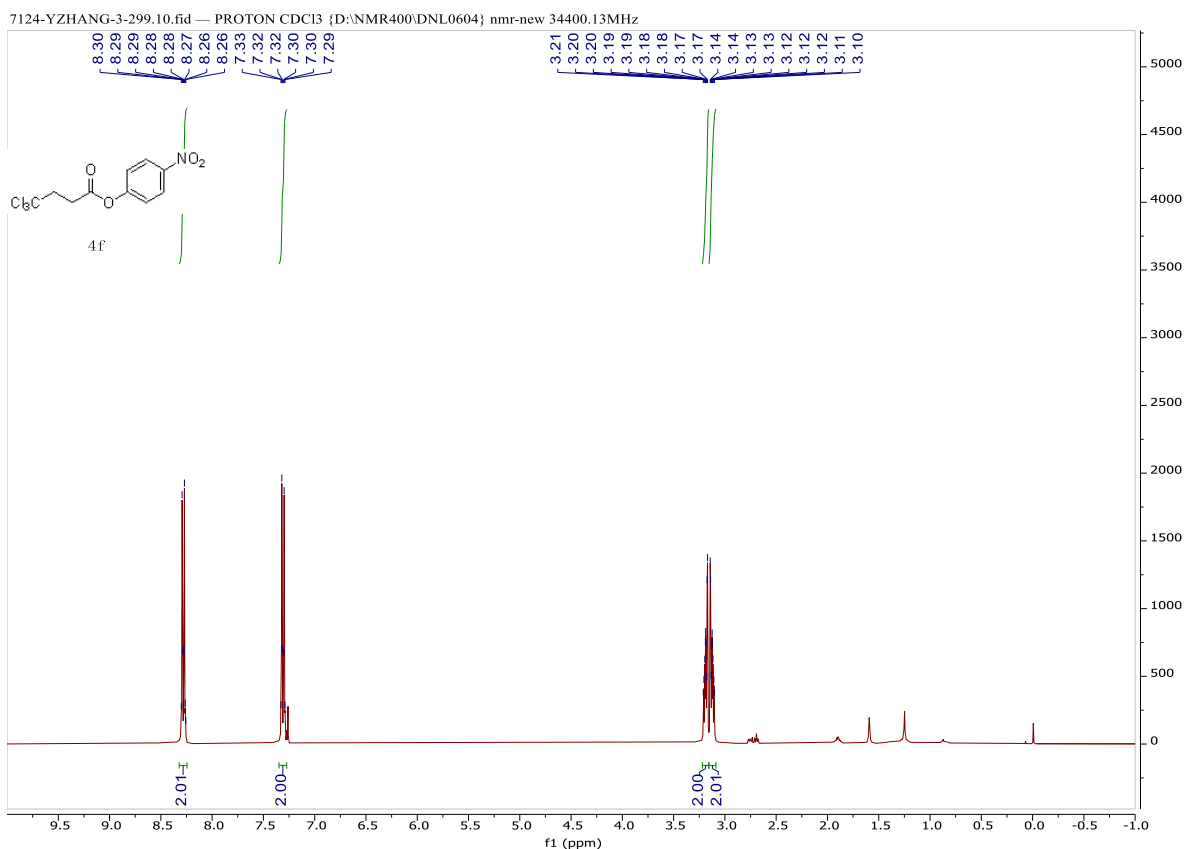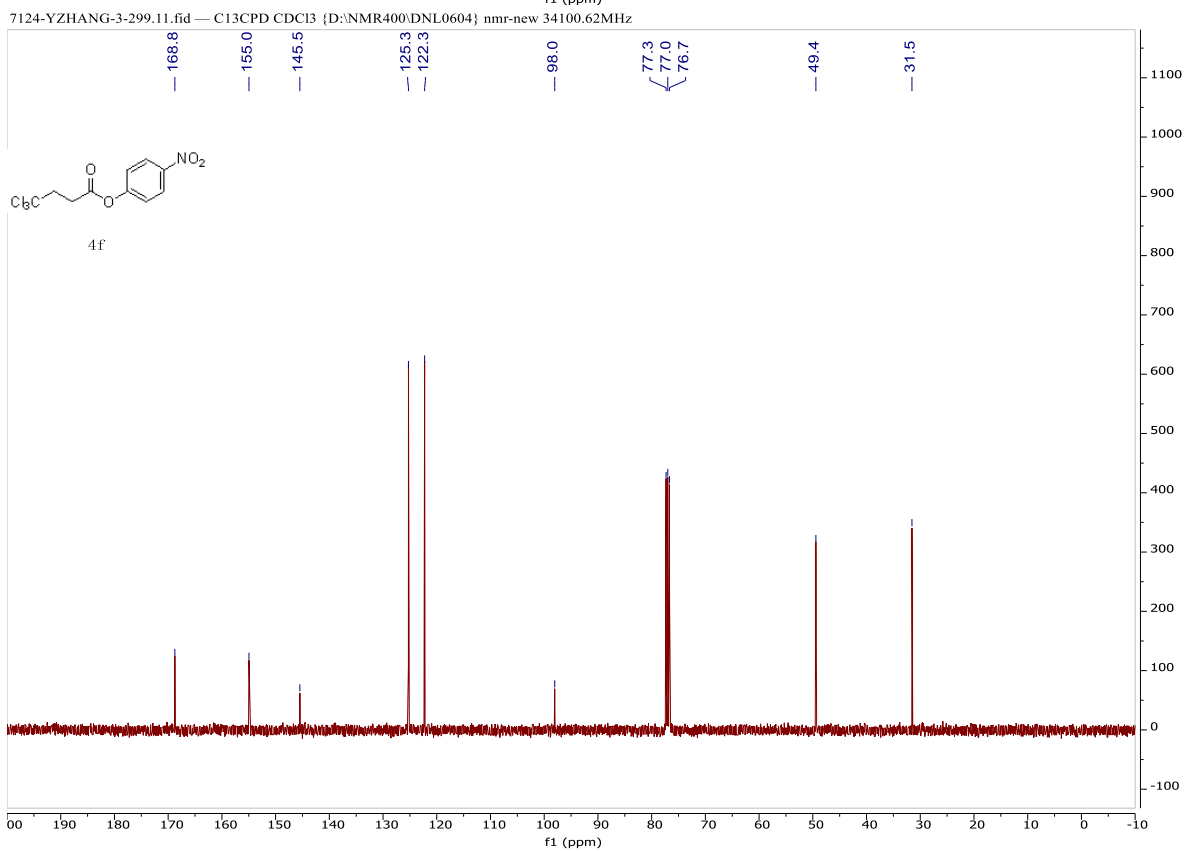

4g

6958-yzhang-3-263.10.fid — PROTON CDCl3 {D:\NMR400\DNL0604} nmr-new 46400.13MHz

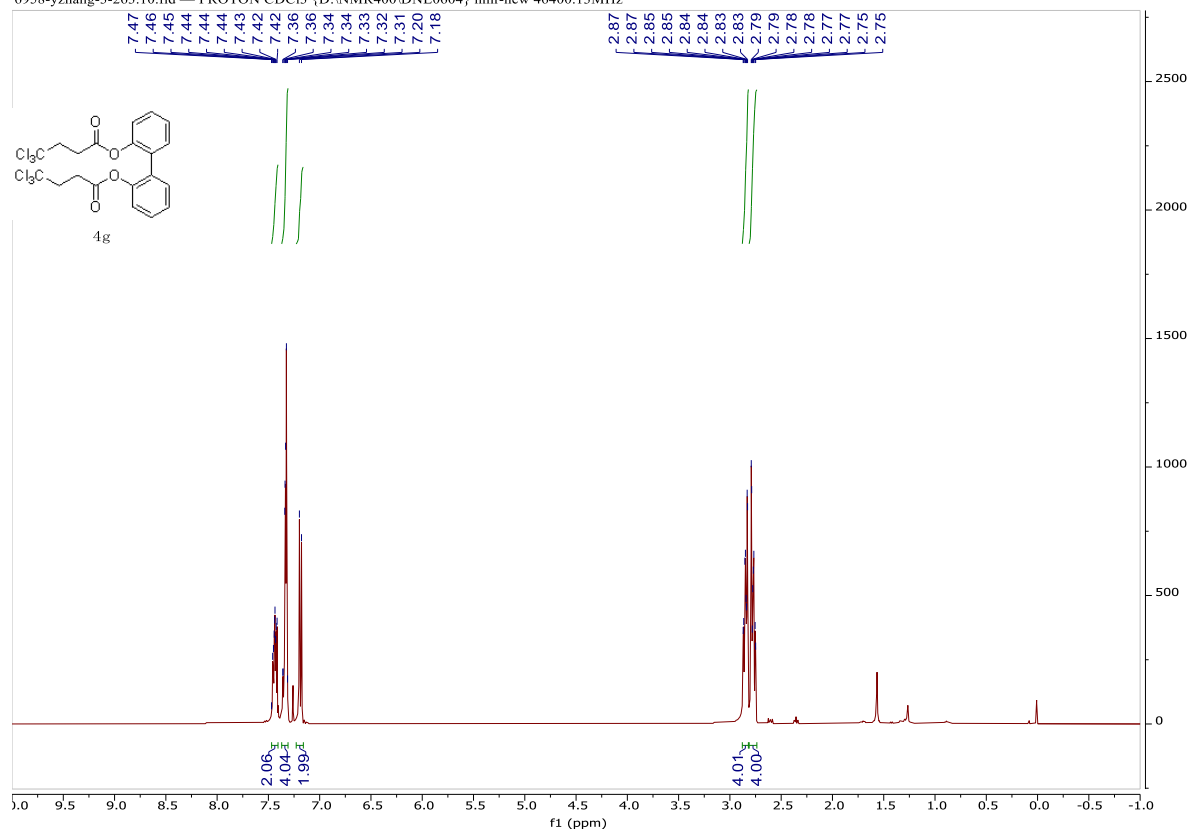

6958-yzhang-3-263.11.fid — C13CPD CDCl3 {D:\NMR400\DNL0604} nmr-new 46100.62MHz

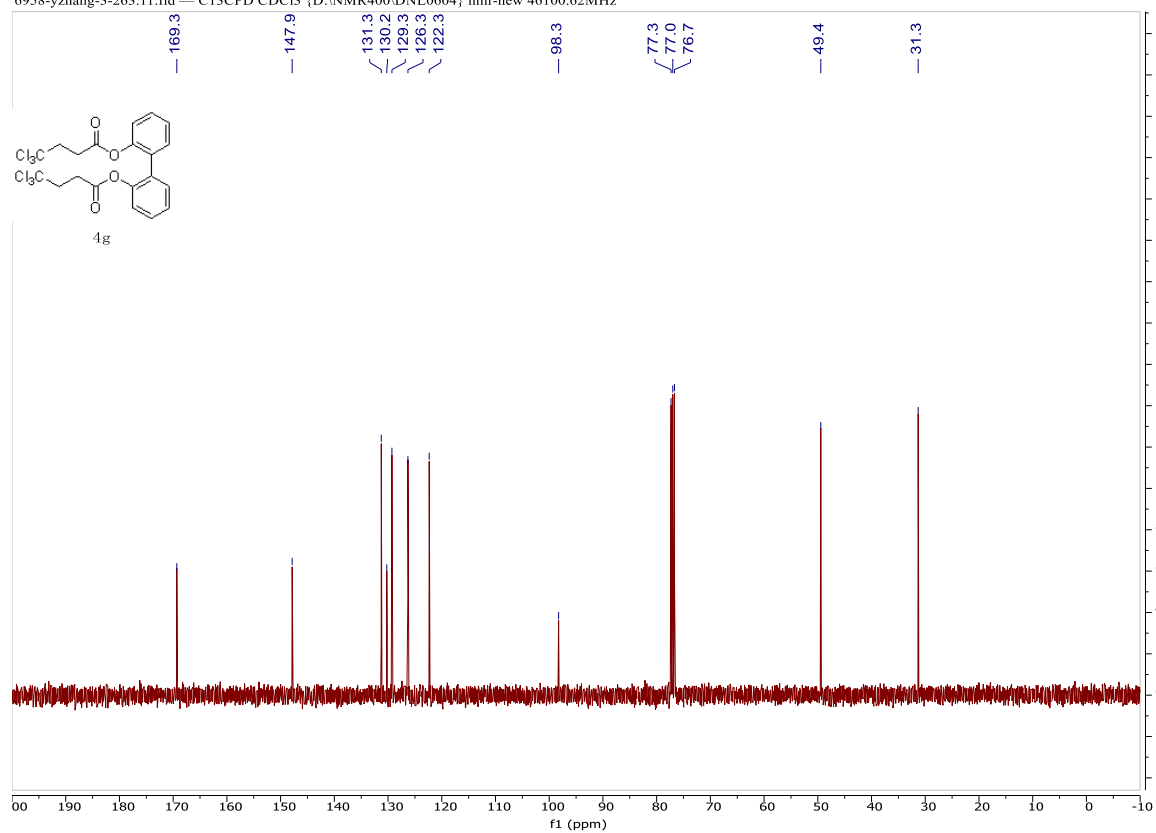

4h

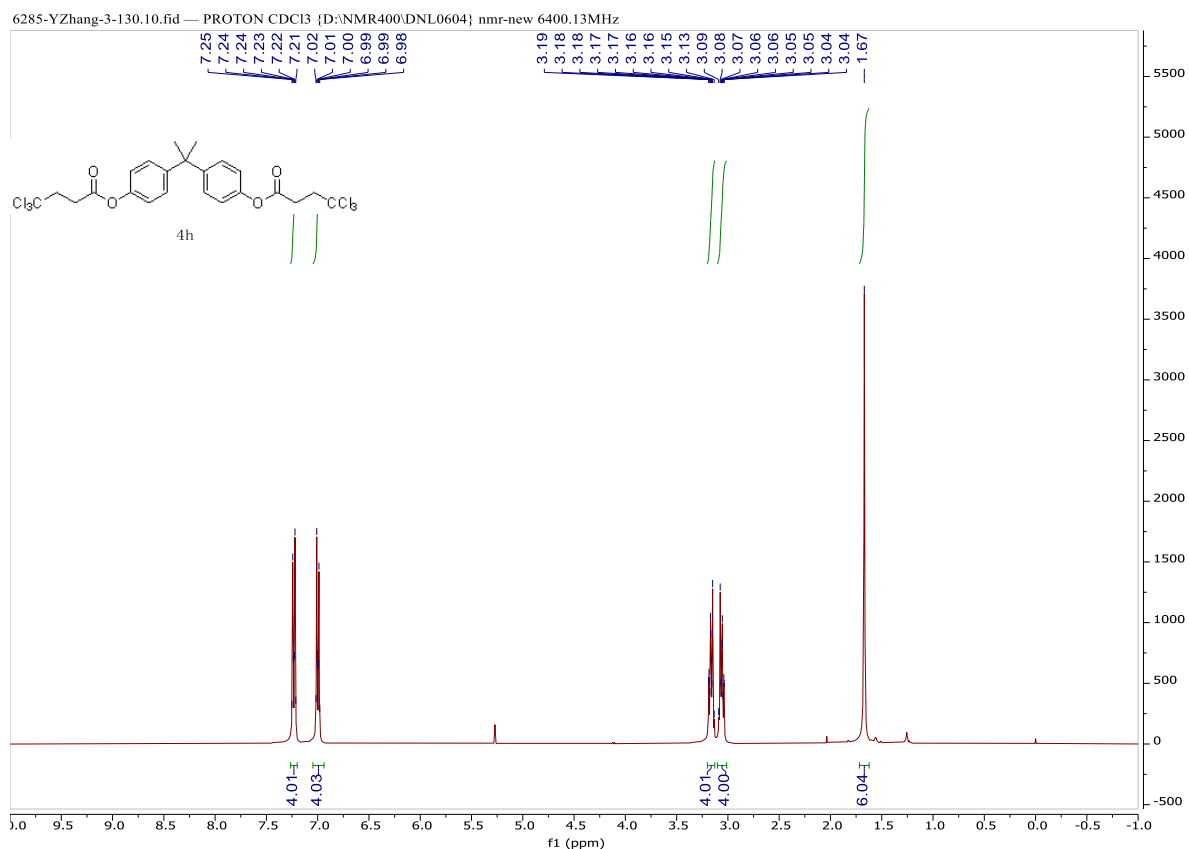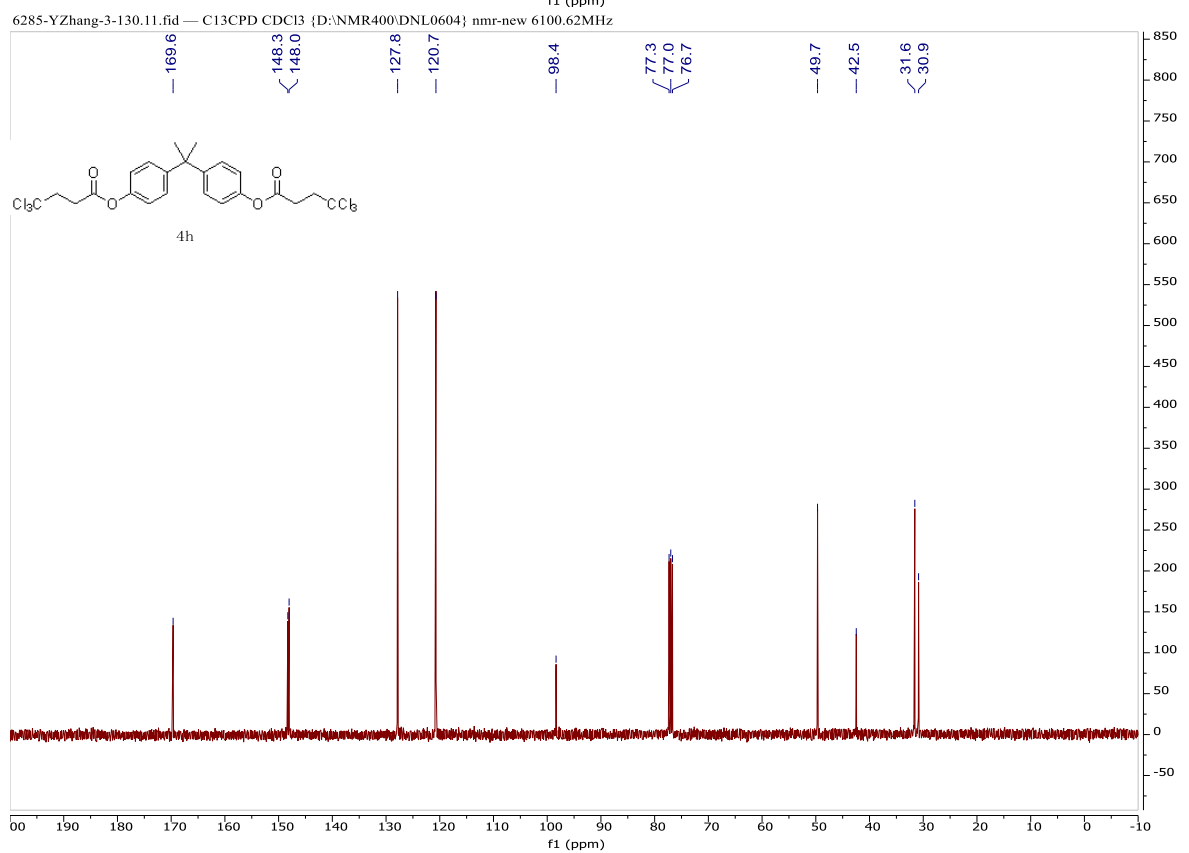

4i

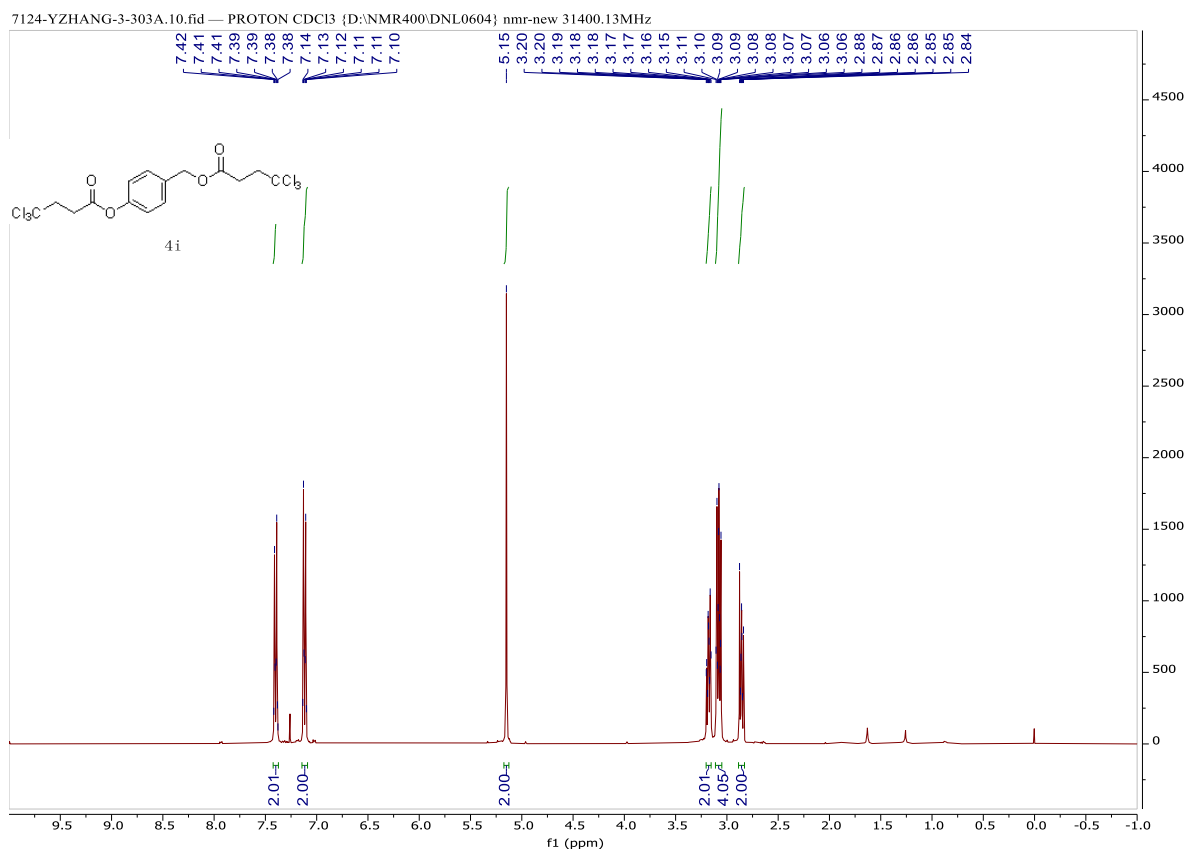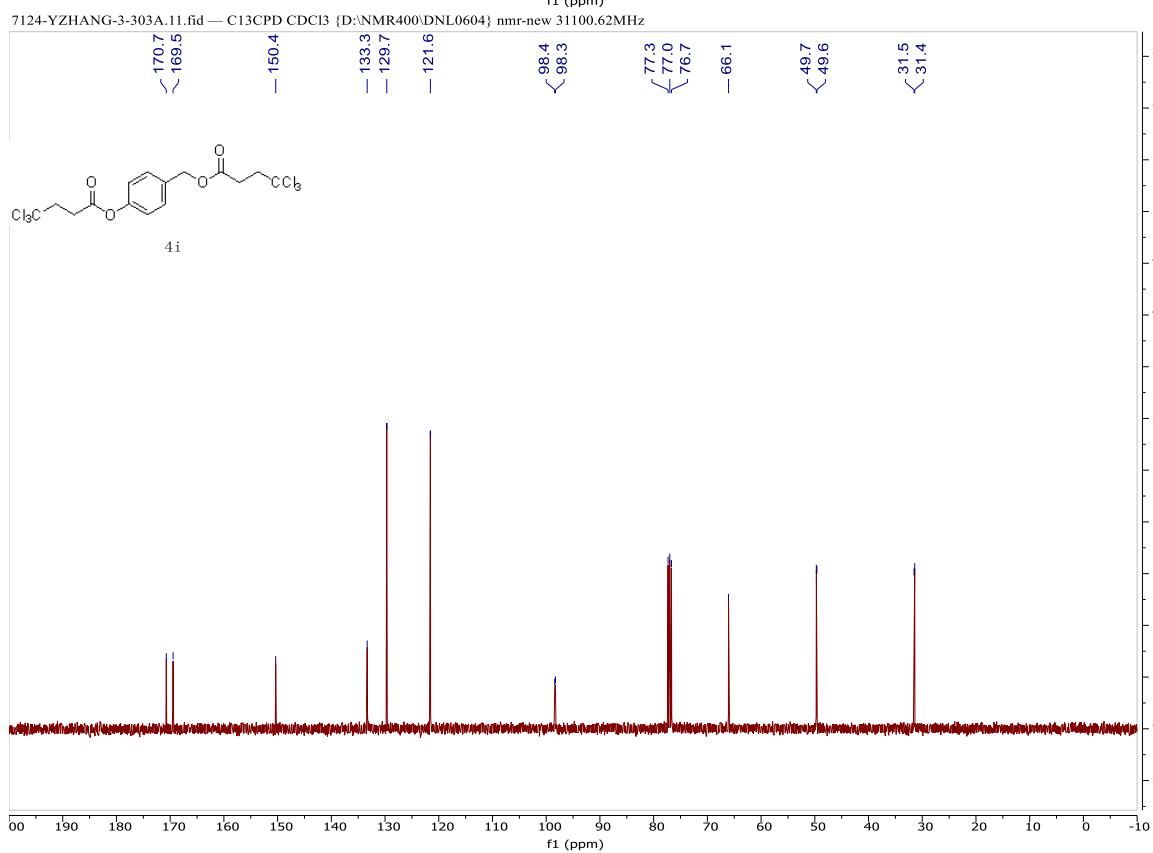

4j

7124-YZHANG-3-265.10.fid — PROTON CDC13 {D:\NMR400\DNL0604} nmr-new 33400.13MHz

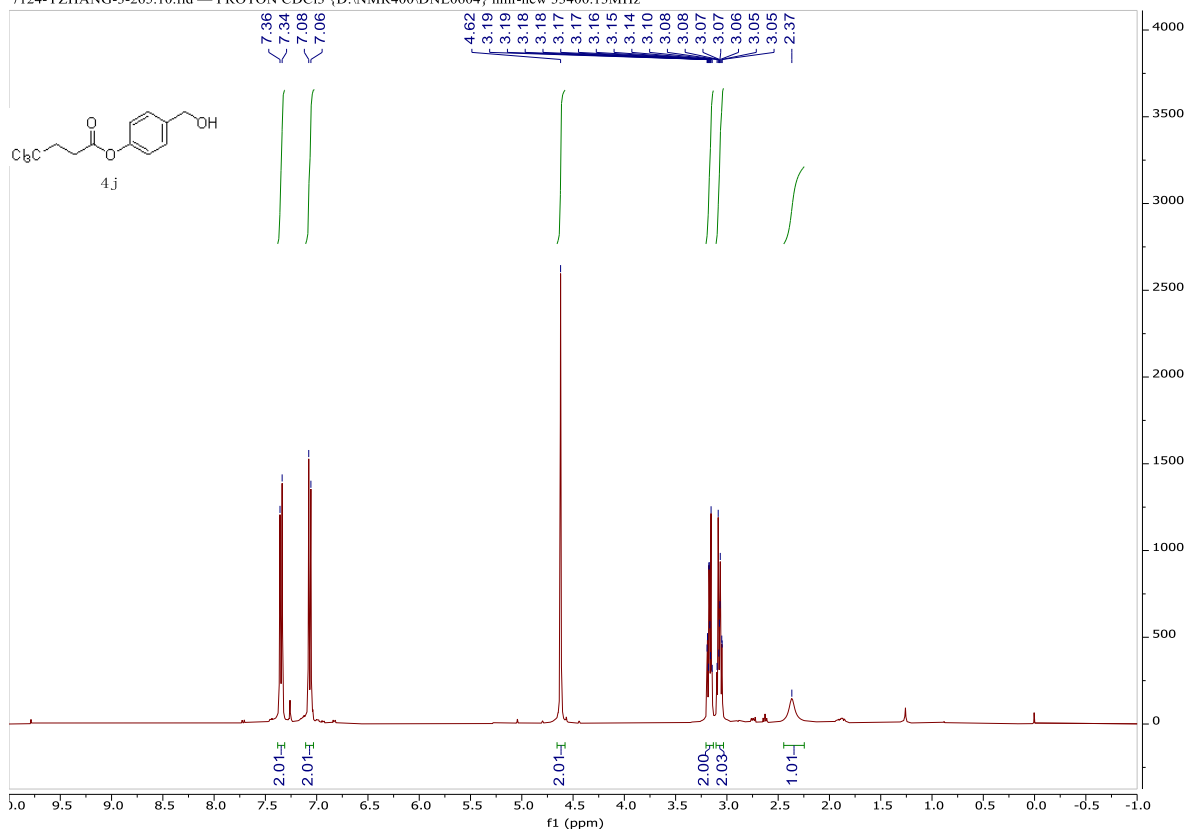

7124-YZHANG-3-265.11.fid — C13CPD CDC13 {D:\NMR400\DNL0604} nmr-new 33100.62MHz

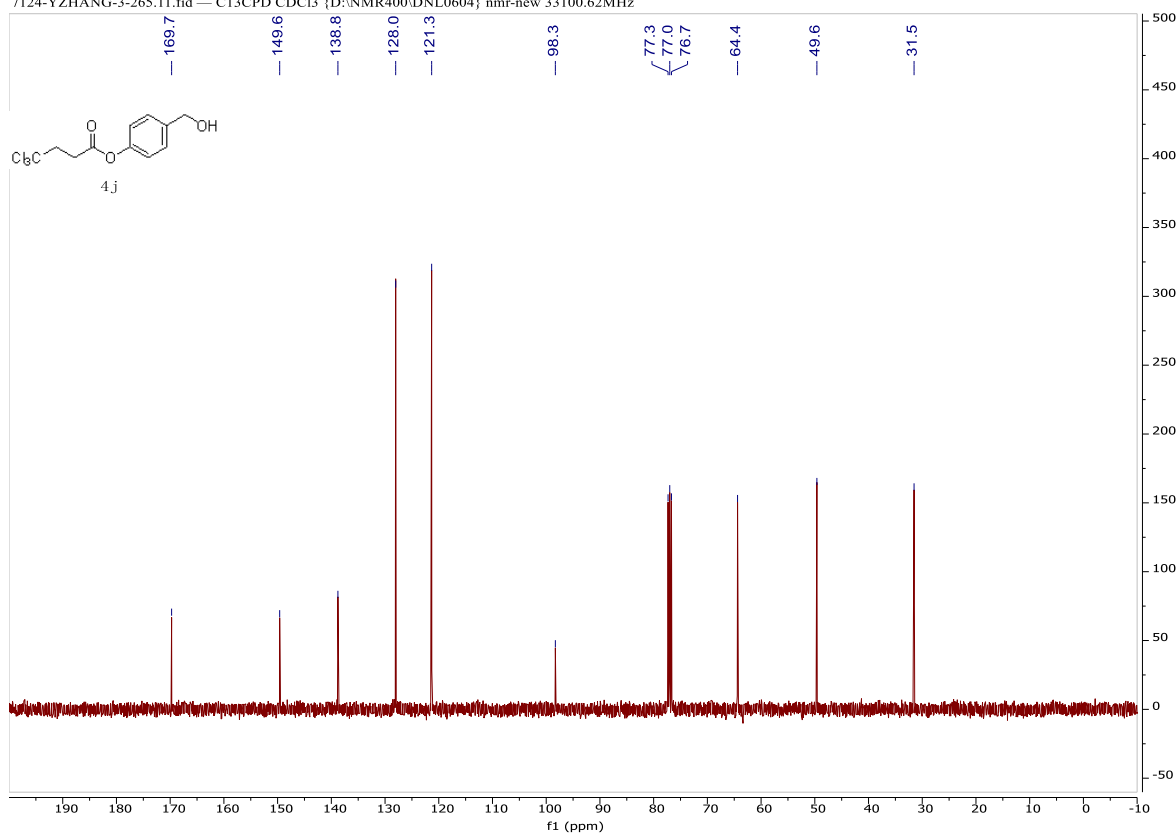



4k

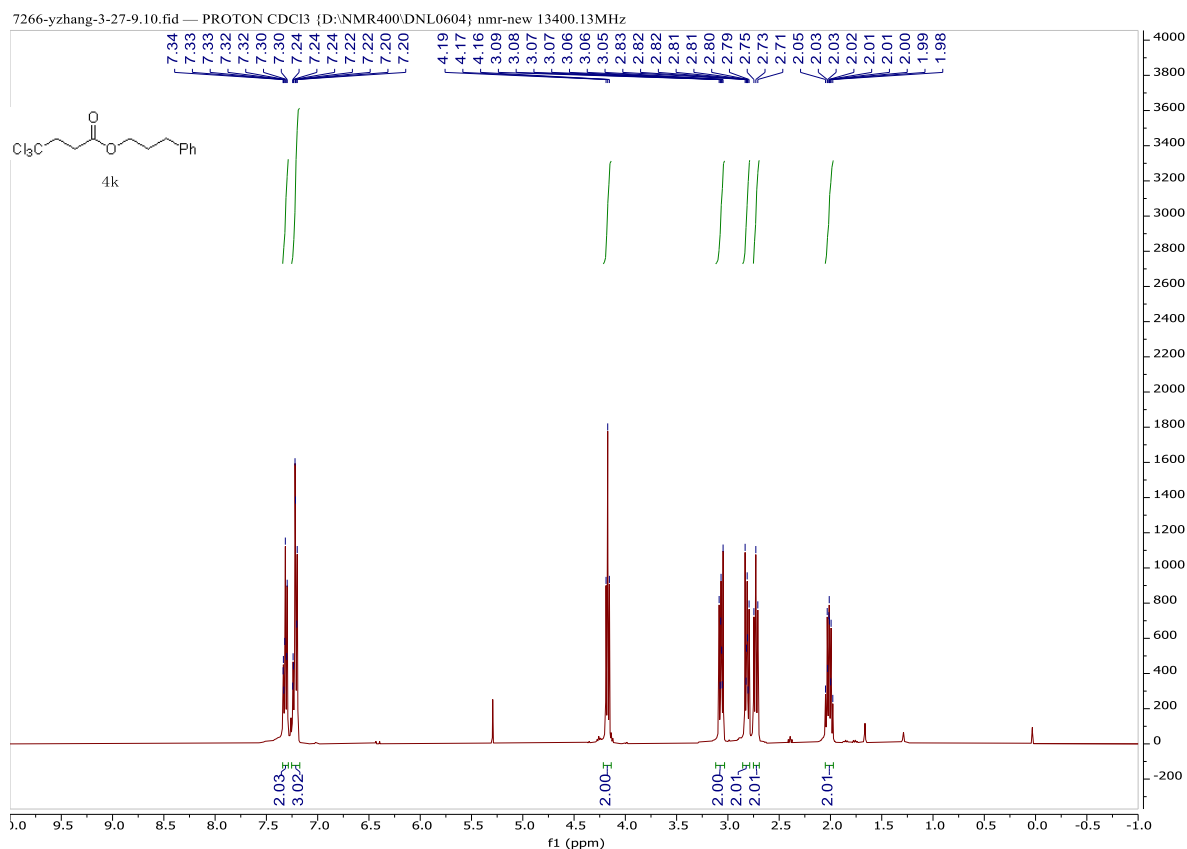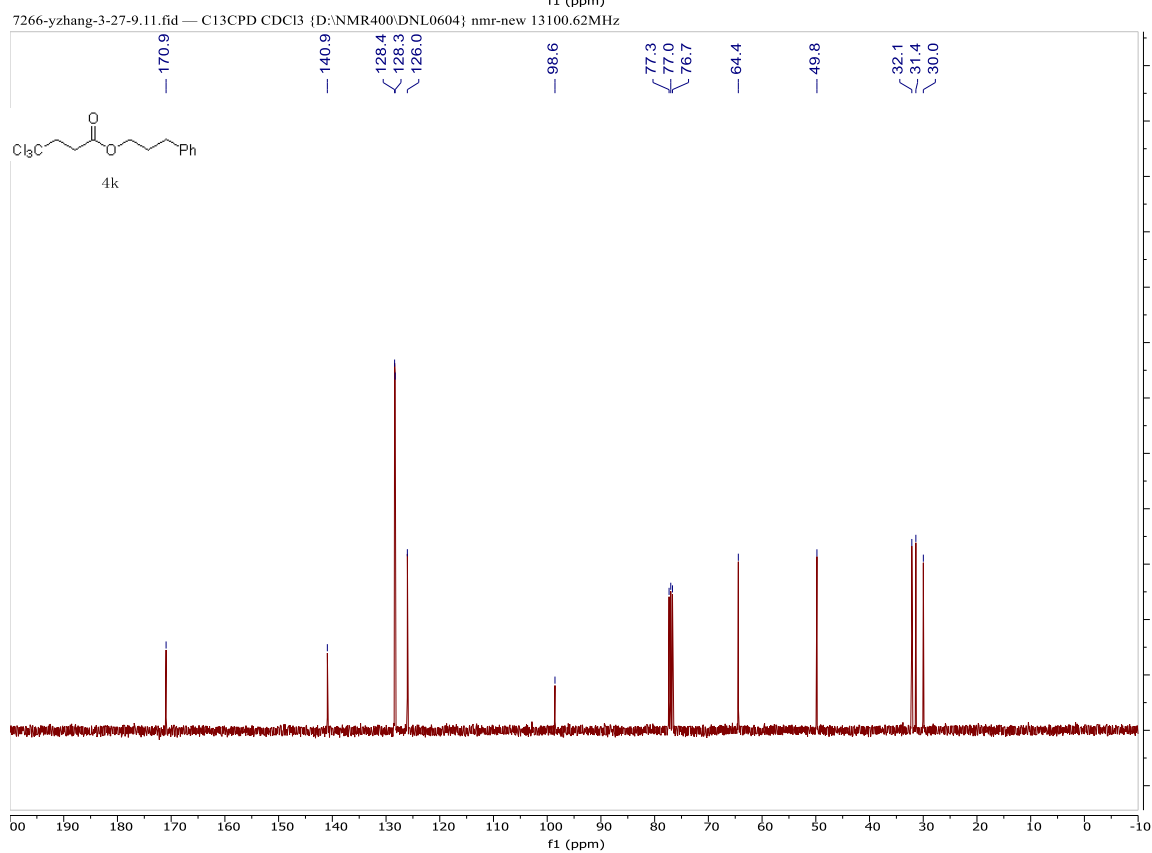

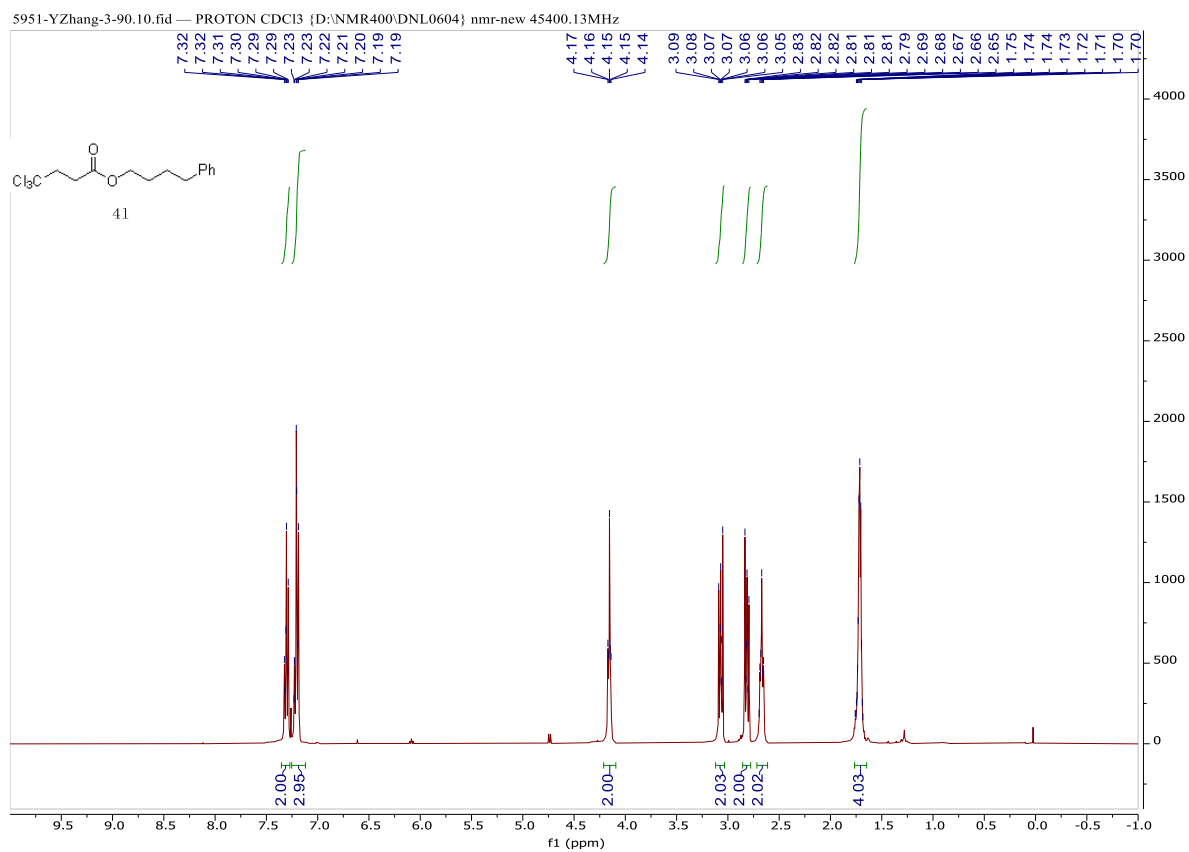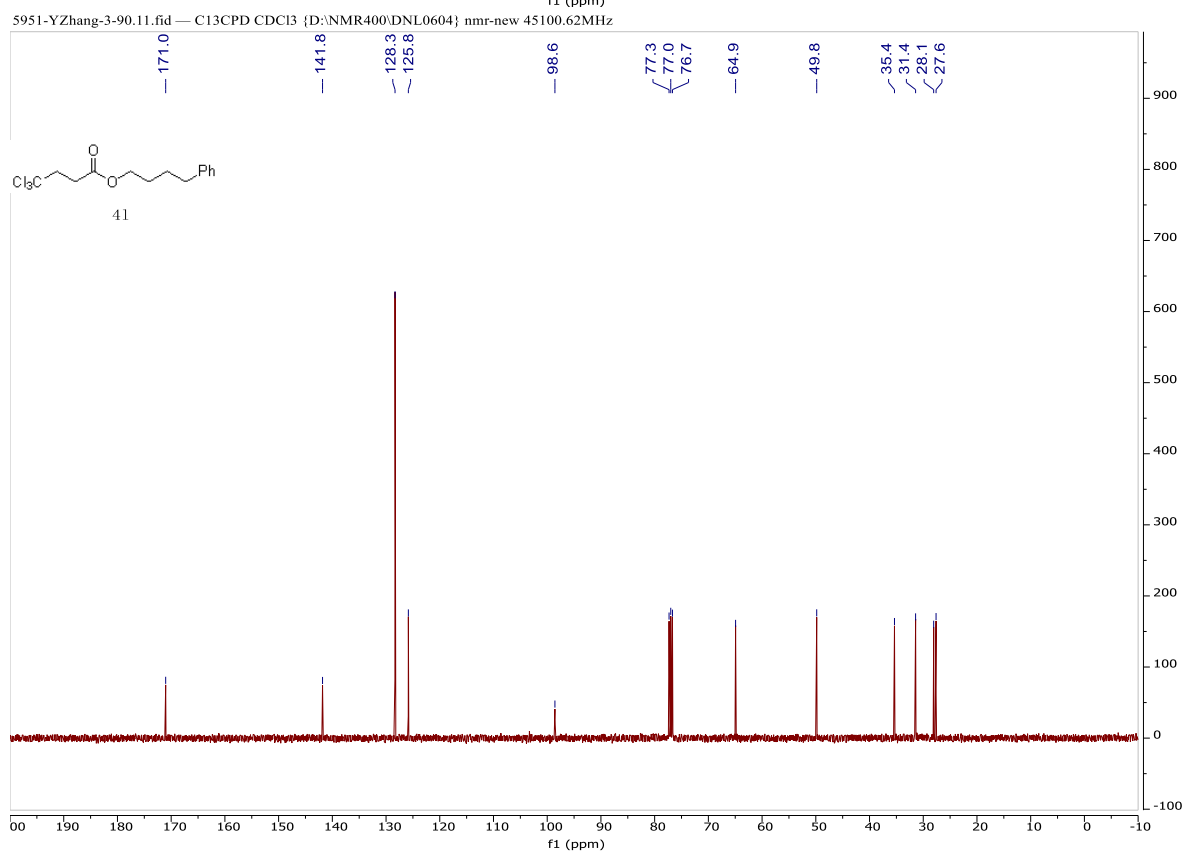

4m

6072-YZhang-3-126.10.fid — PROTON CDCl3 {D:\NMR400\DNL0604} nmr-new 18400.13MHz

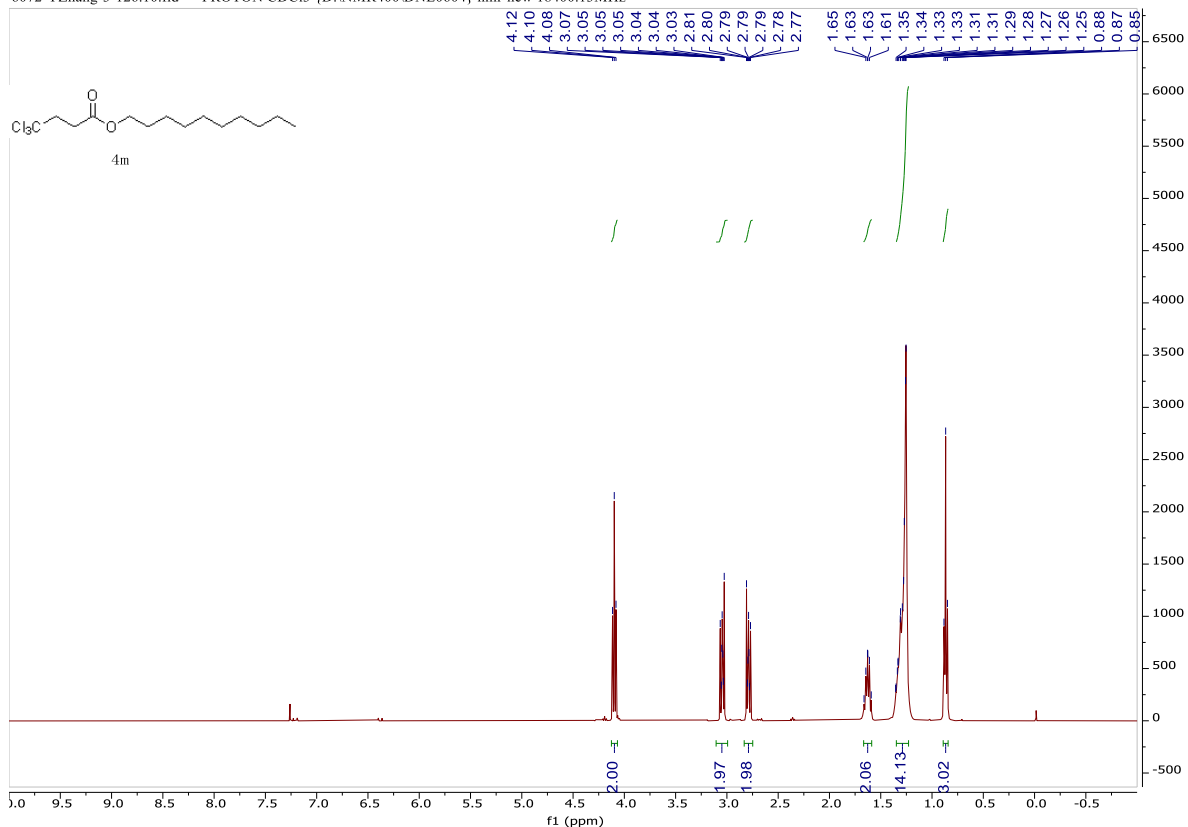

6072-YZhang-3-126.52.fid — C13CPD CDCl3 {D:\NMR400\DNL0604} nmr-new 18100.62MHz

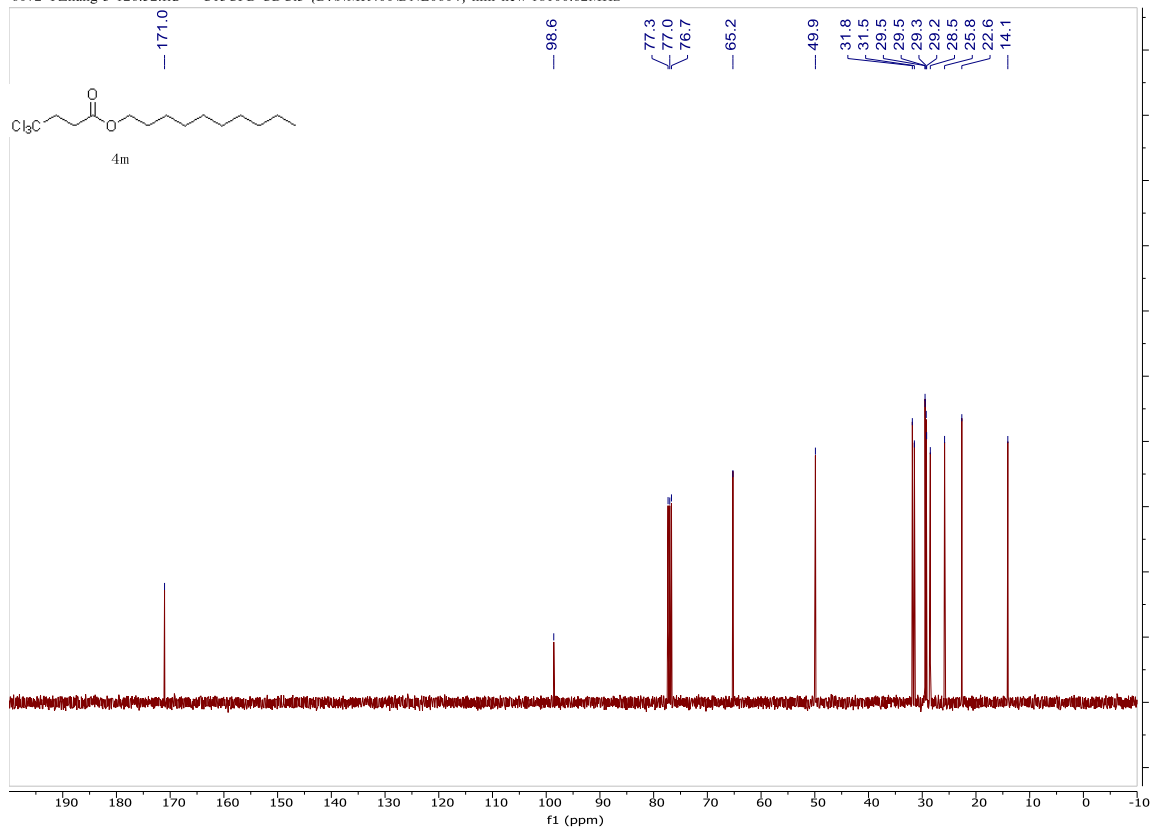

4n

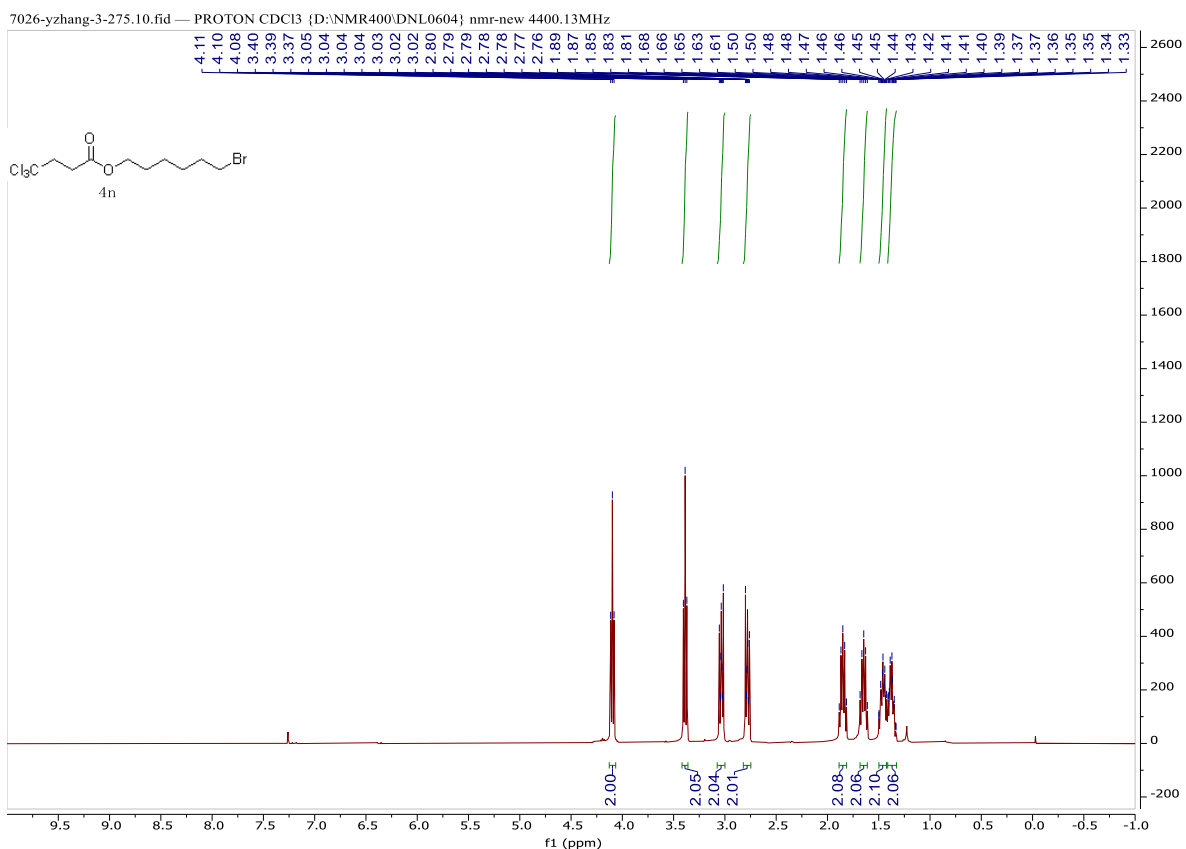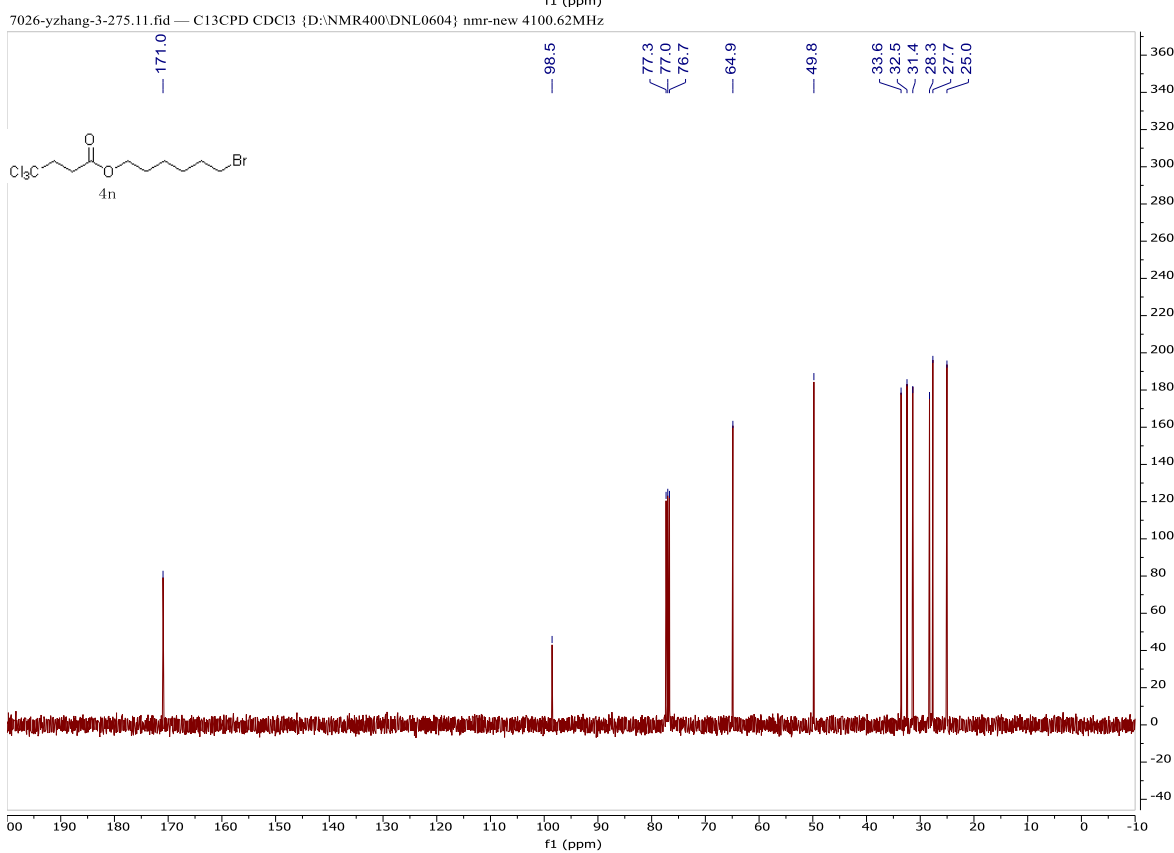

4o

6256-YZhang-0-3-133.10.fid — PROTON CDC13 {D:\NMR400\DNL0604} nmr-new 23400.13MHz

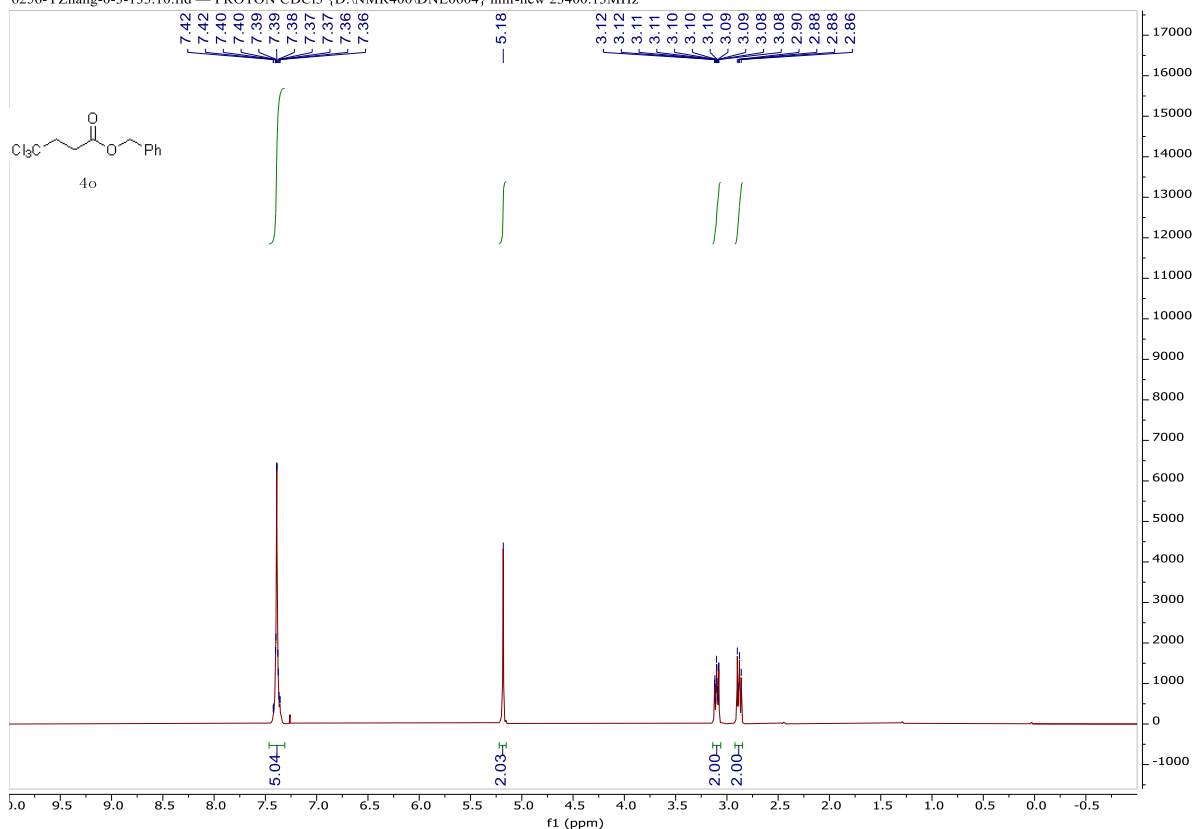

6256-YZhang-0-3-133.11.fid — C13CPD CDC13 {D:\NMR400\DNL0604} nmr-new 23100.62MHz

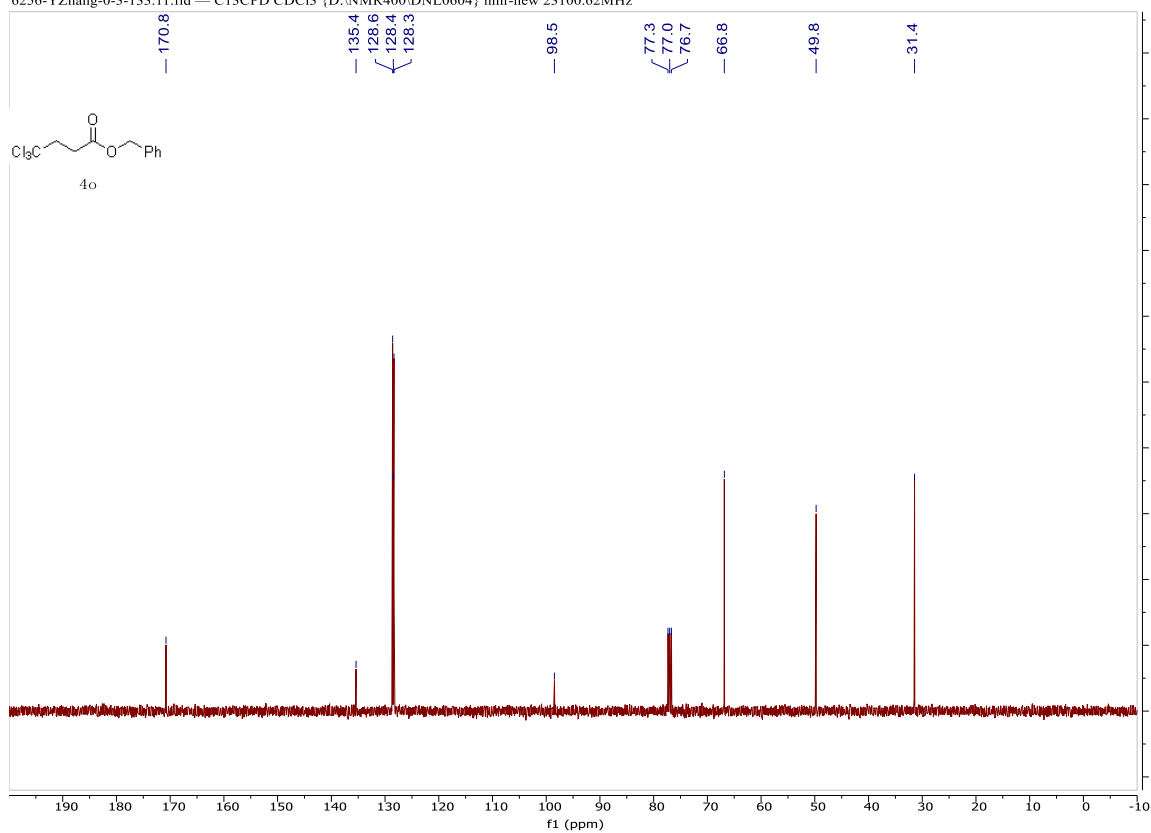

4p

7002-YZhang-3-267.10.fid — PROTON CDCl3 {D:\NMR400\DNL0604} nmr-new 49400.13MHz

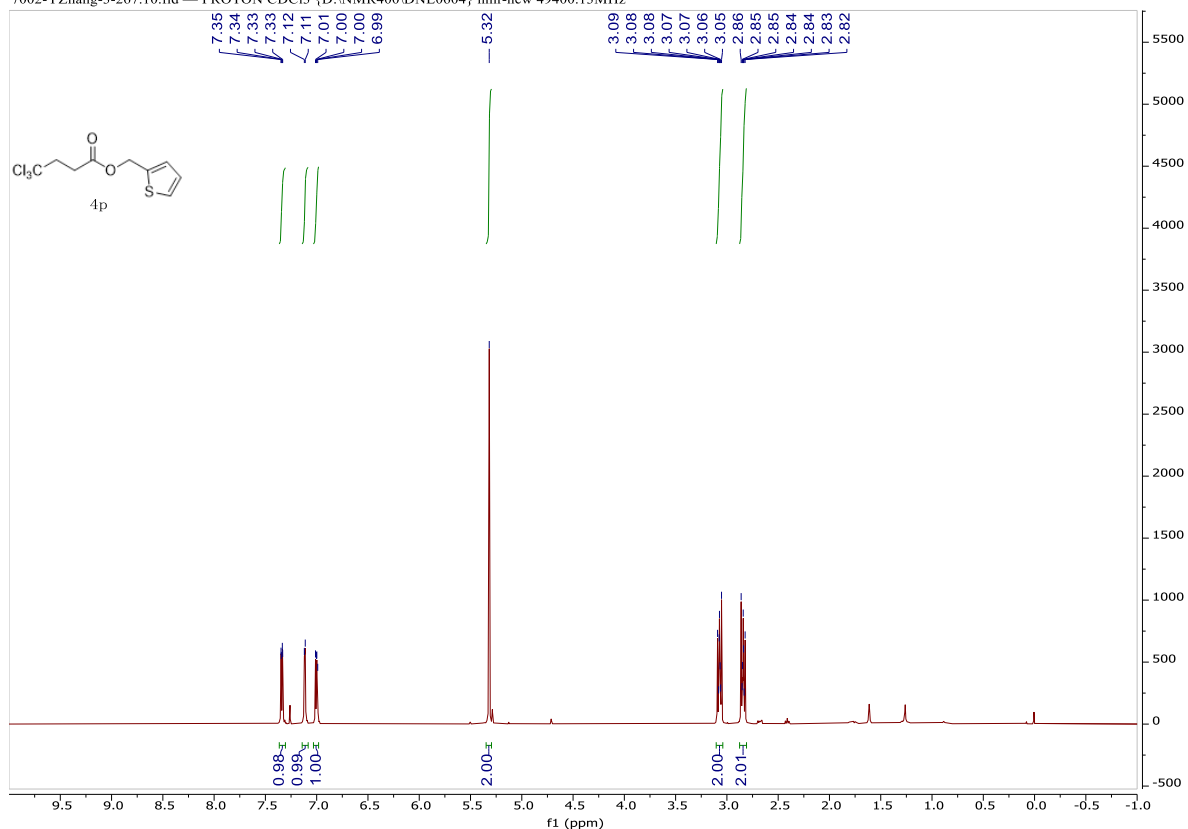

7002-YZhang-3-267.11.fid — C13CPD CDCl3 {D:\NMR400\DNL0604} nmr-new 49100.62MHz

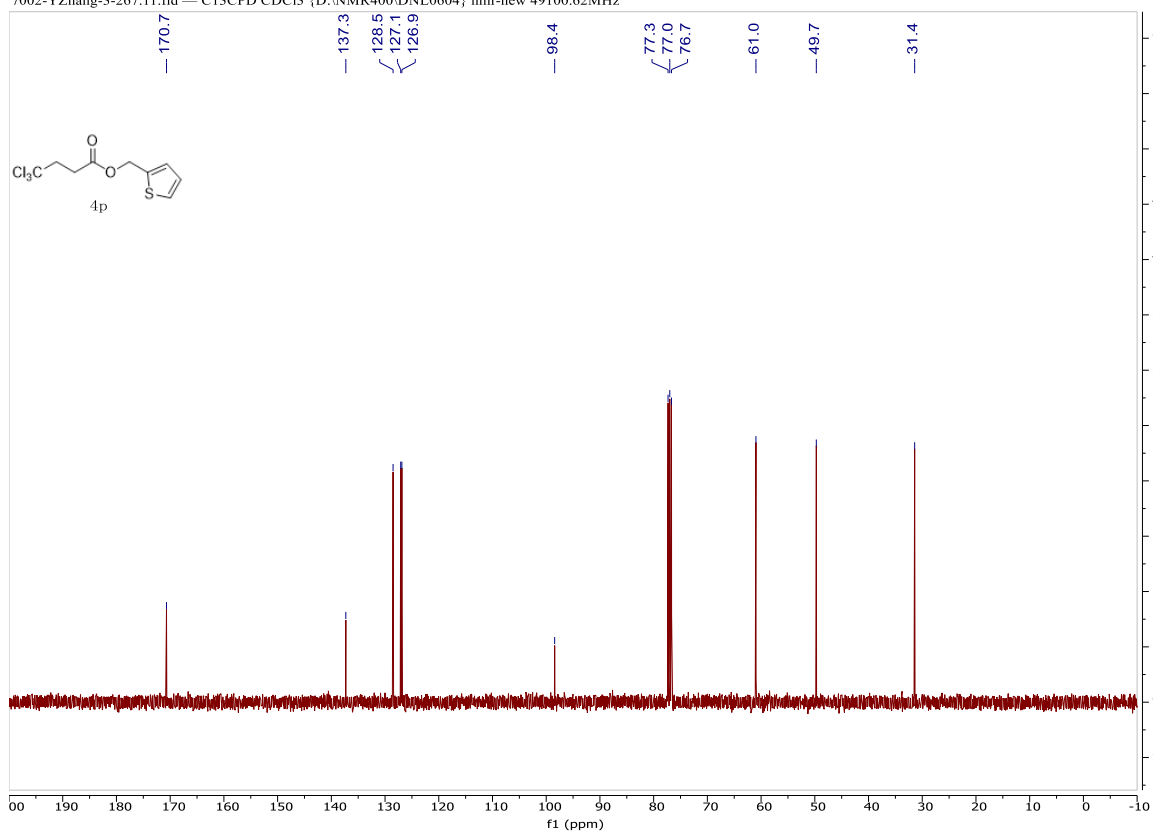

4q

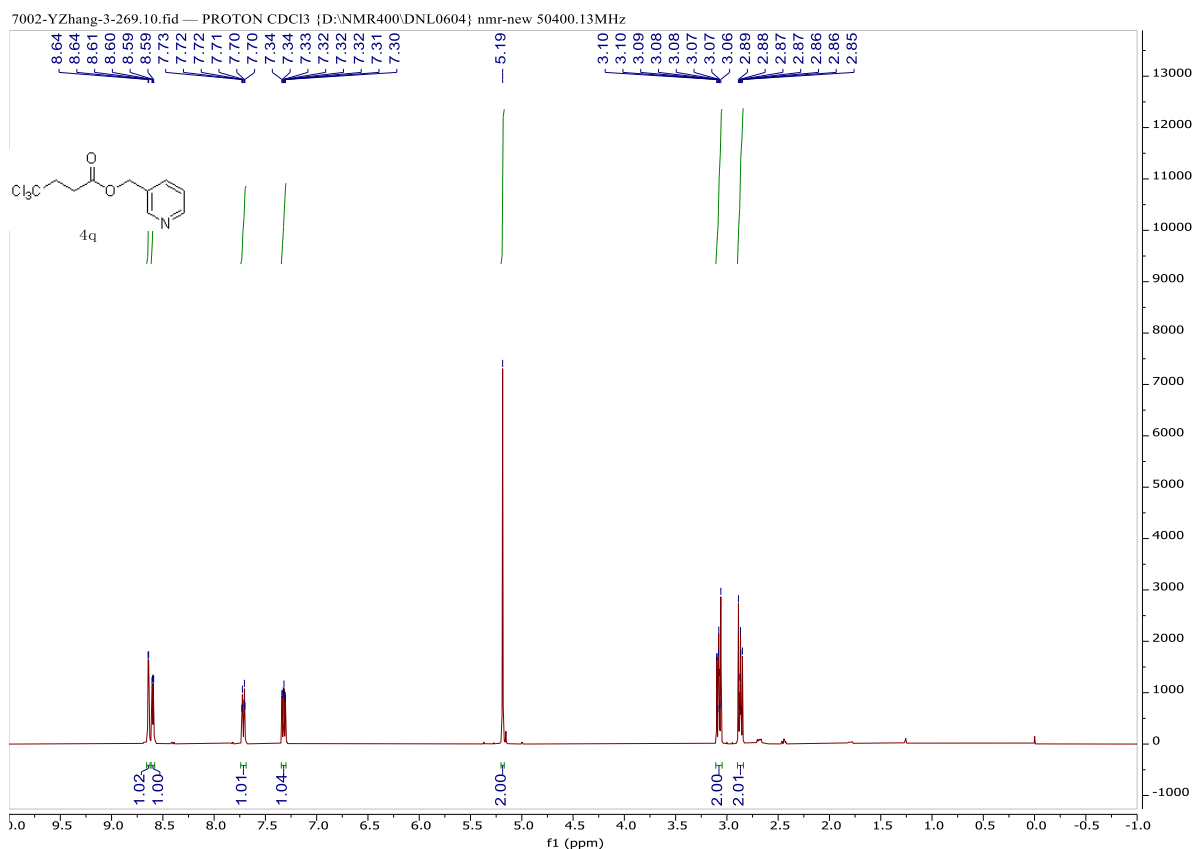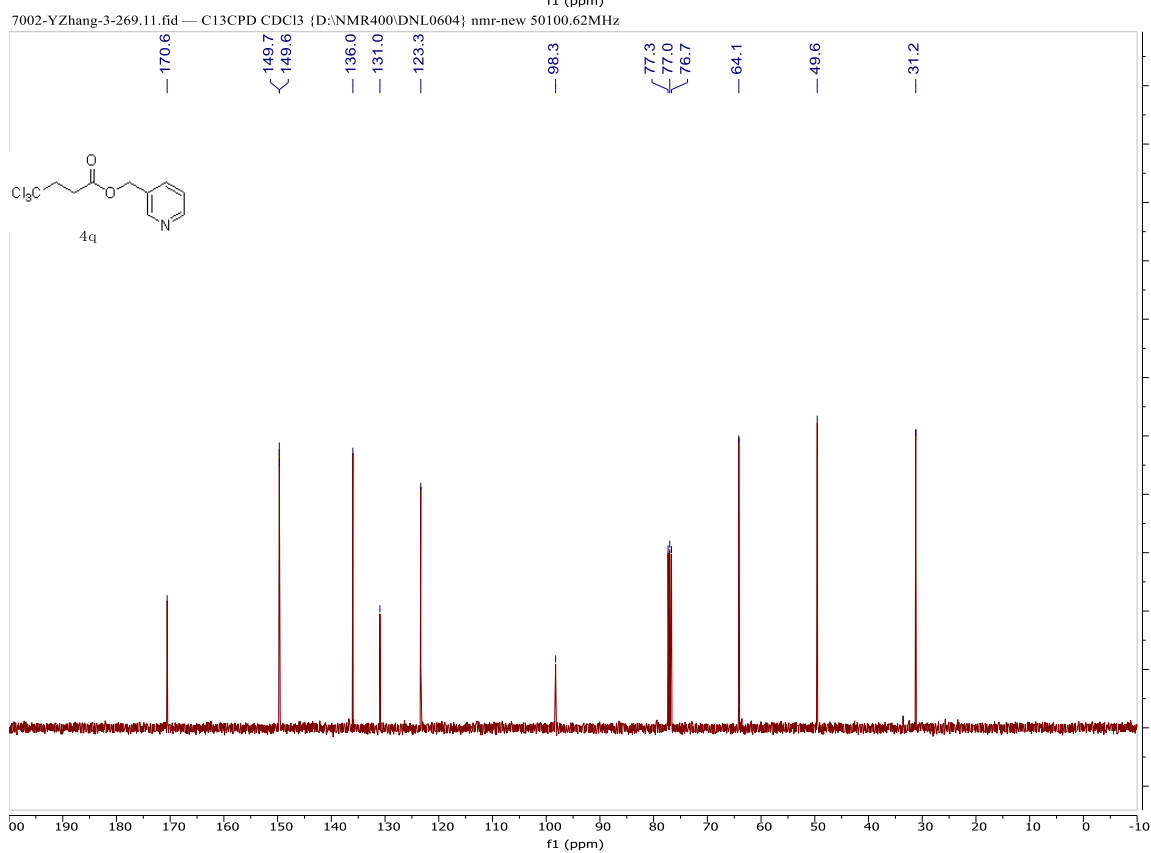

4r

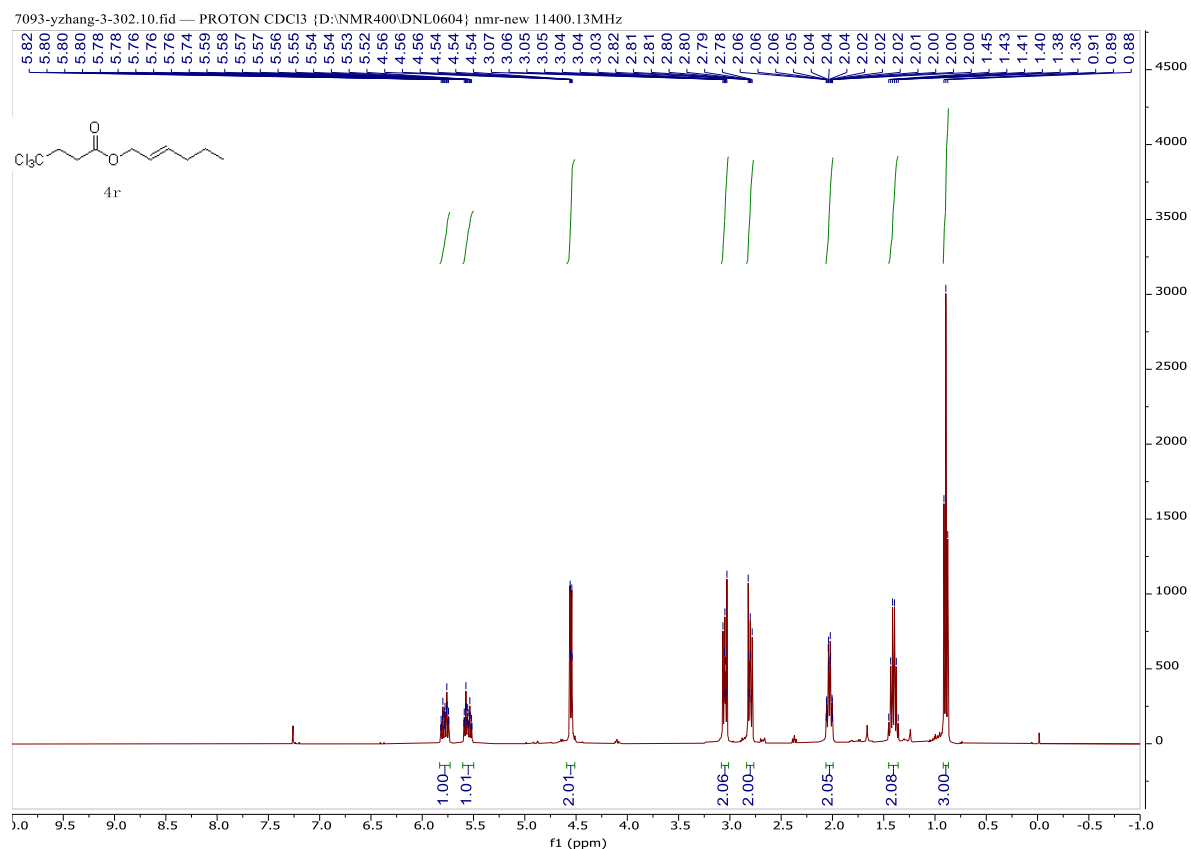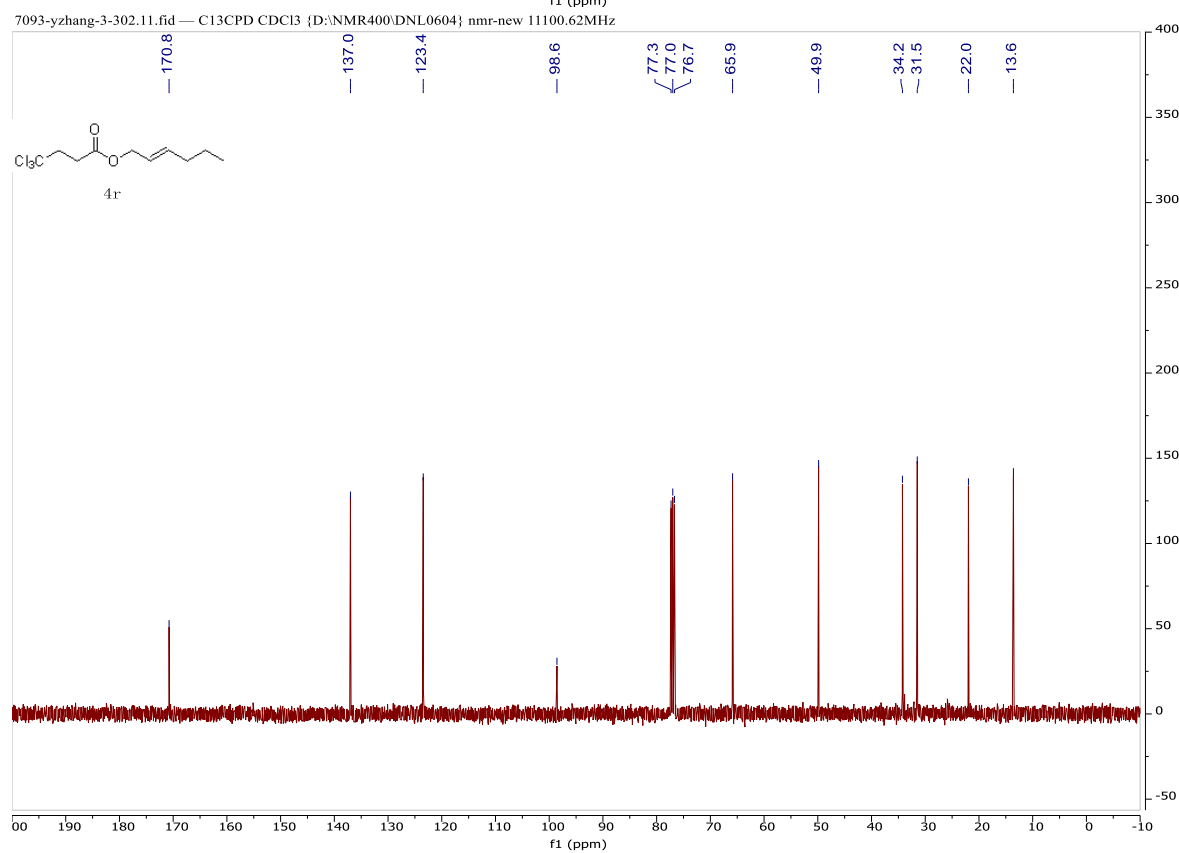



4s

7002-YZhang-3-265.10.fid — PROTON CDCl3 {D:\NMR400\DNL0604} nmr-new 47400.13MHz

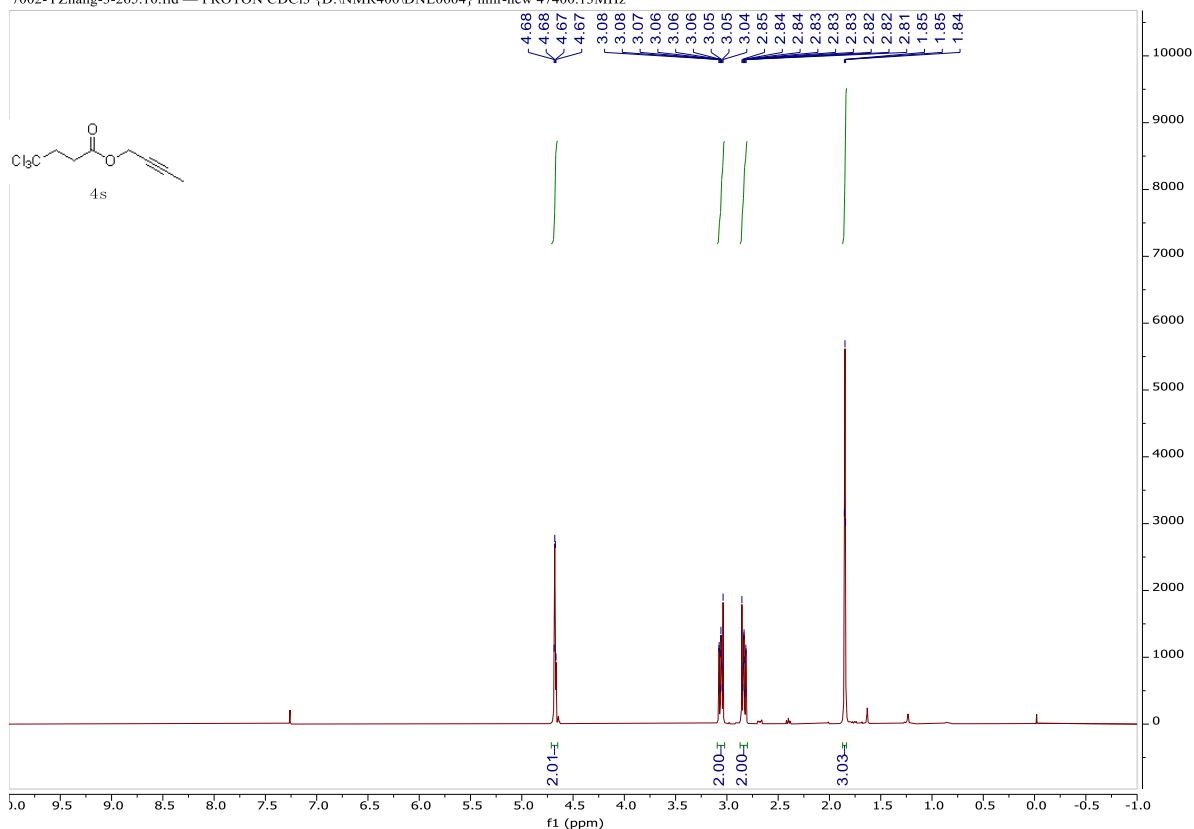

7002-YZhang-3-265.11.fid — C13CPD CDCl3 {D:\NMR400\DNL0604} nmr-new 47100.62MHz

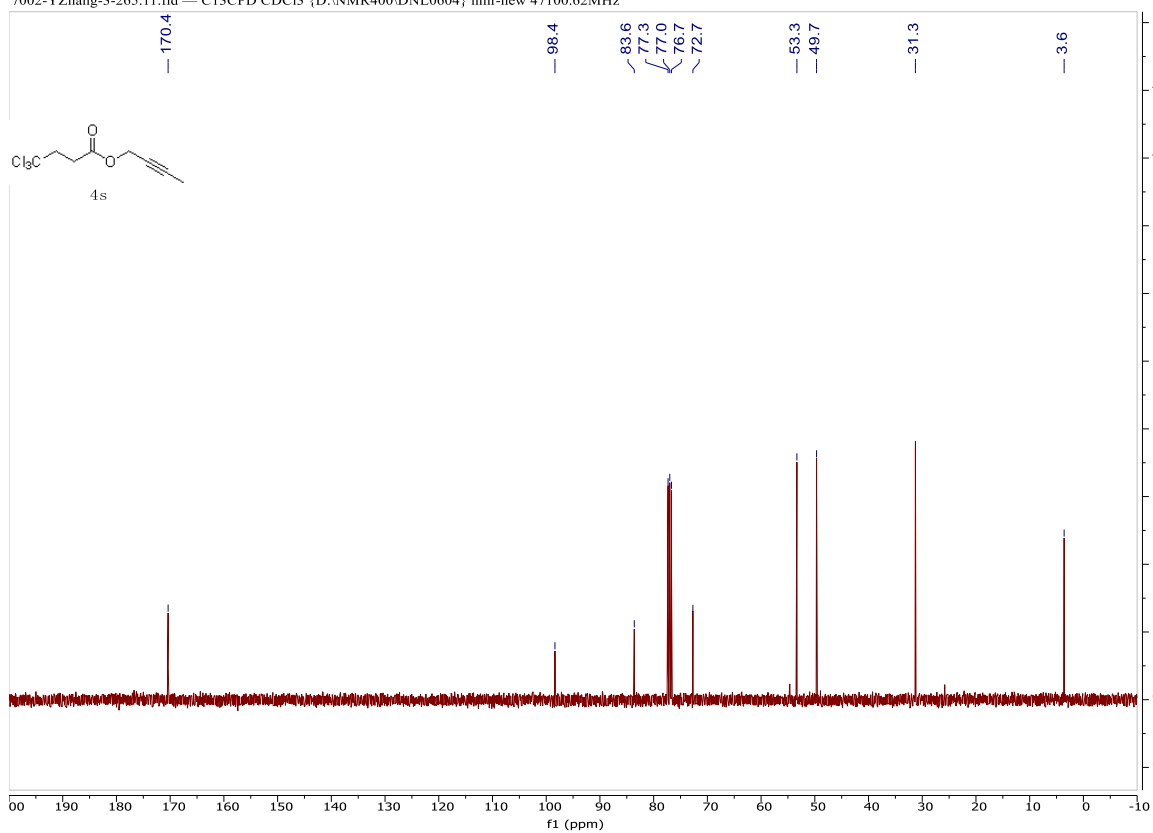

4t

6072-YZhang-3-135a.10.fid — PROTON CDC13 {D:\NMR400\DNL0604} nmr-new 20400.13MHz

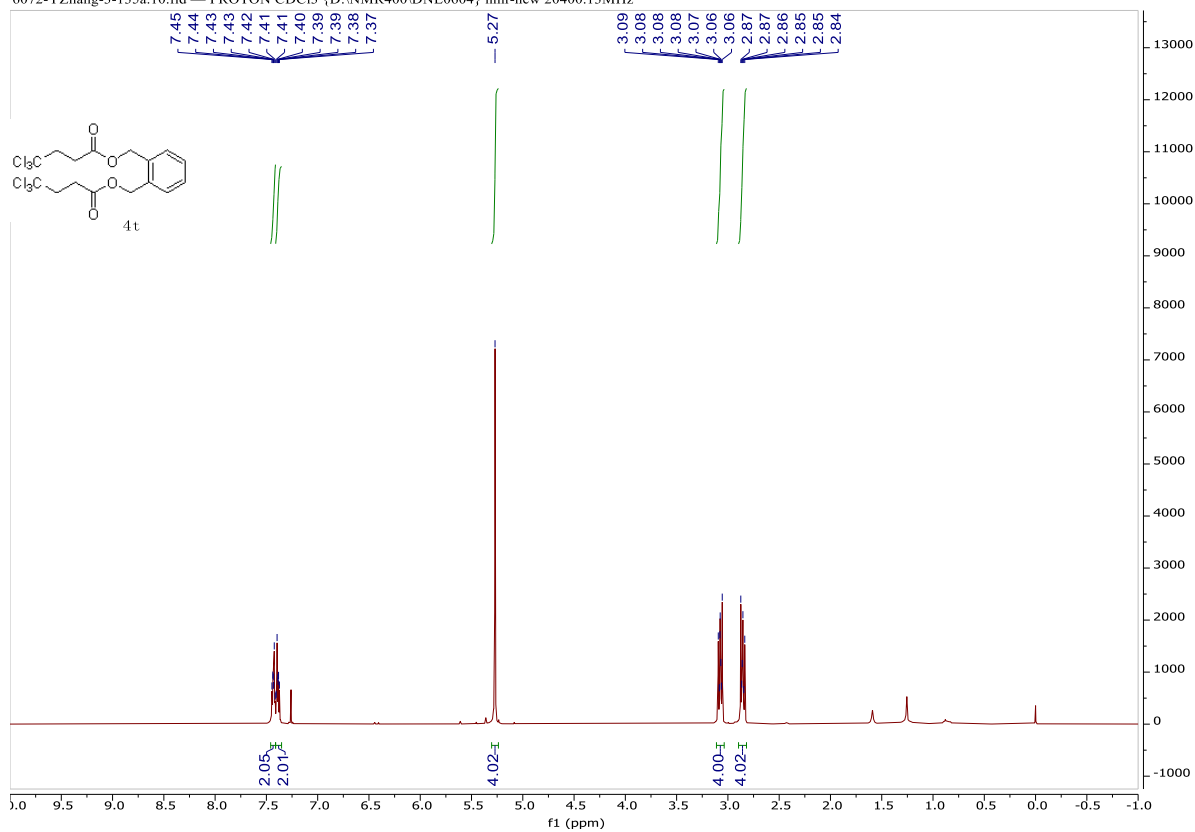

6072-YZhang-3-135a.11.fid — C13CPD CDC13 {D:\NMR400\DNL0604} nmr-new 20100.62MHz

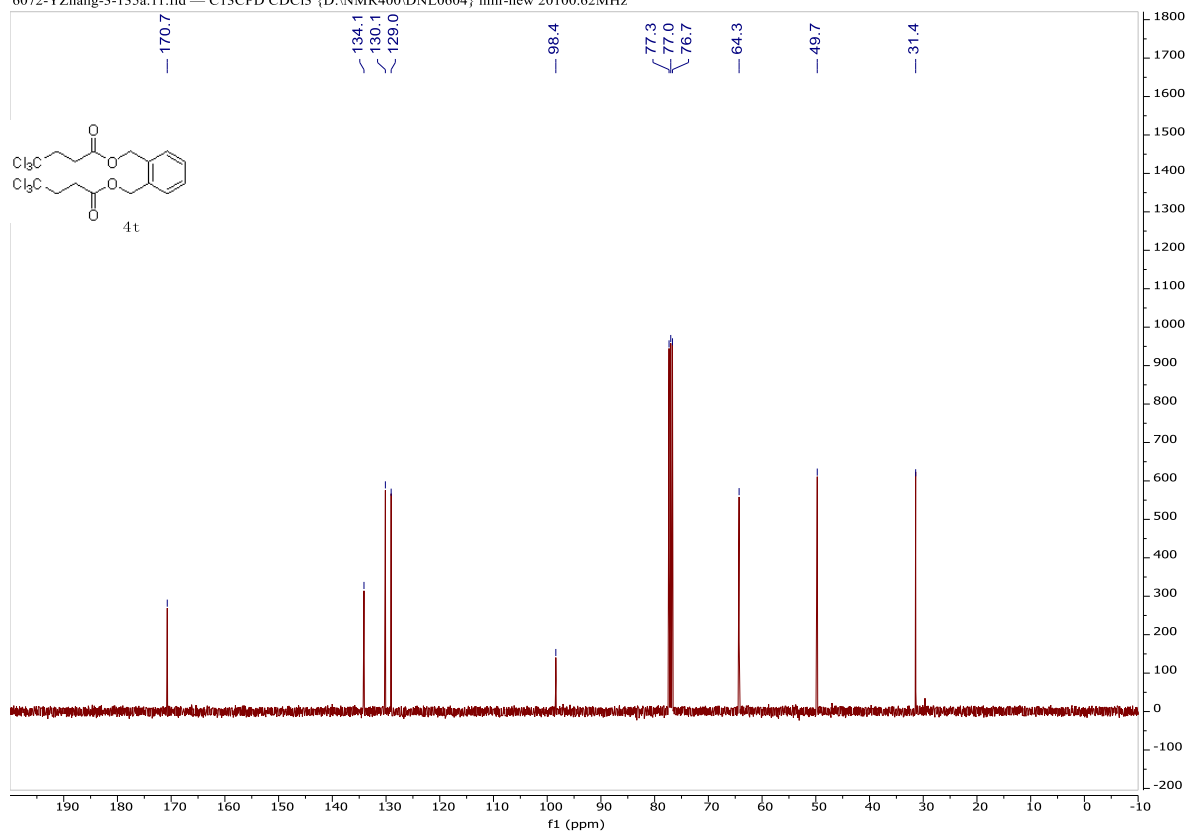

4u

6072-YZhang-3-135b.10.fid — PROTON CDCl3 {D:\NMR400\DNL0604} nmr-new 21400.13MHz

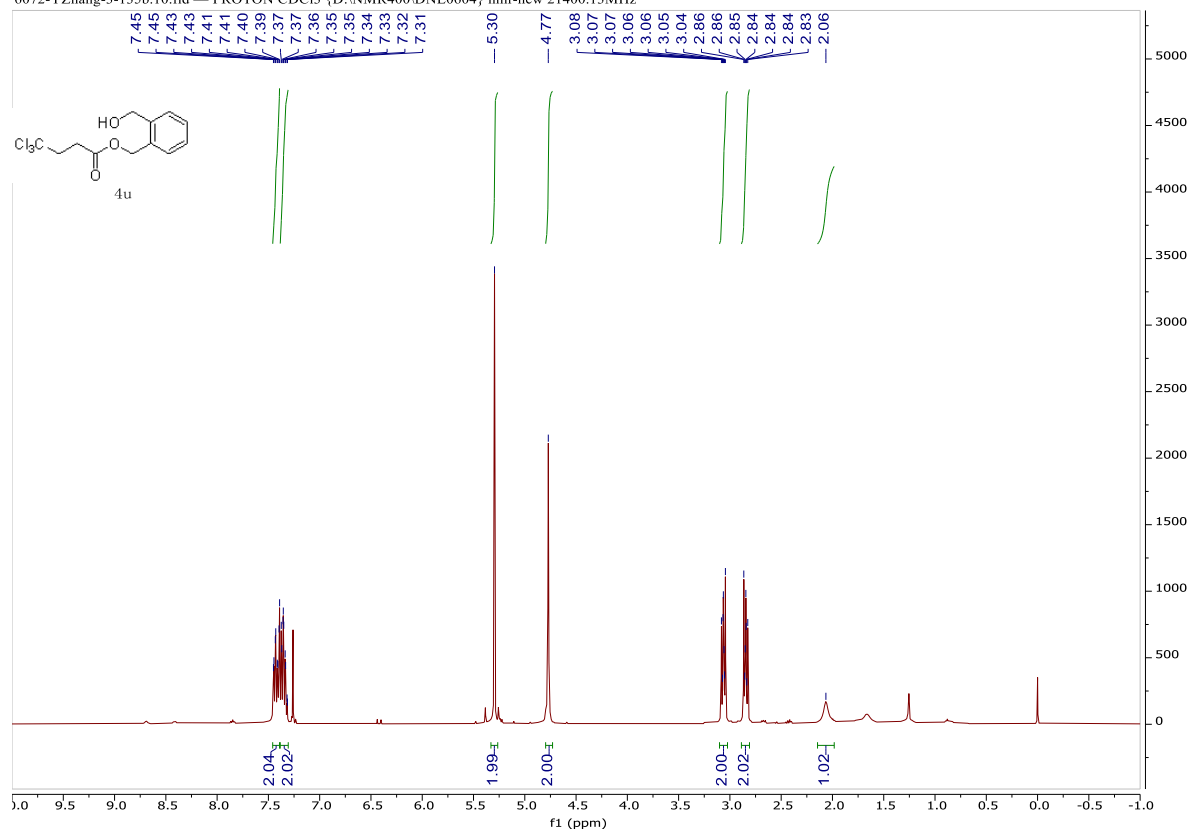

6072-YZhang-3-135b.11.fid — C13CPD CDCl3 {D:\NMR400\DNL0604} nmr-new 21100.62MHz

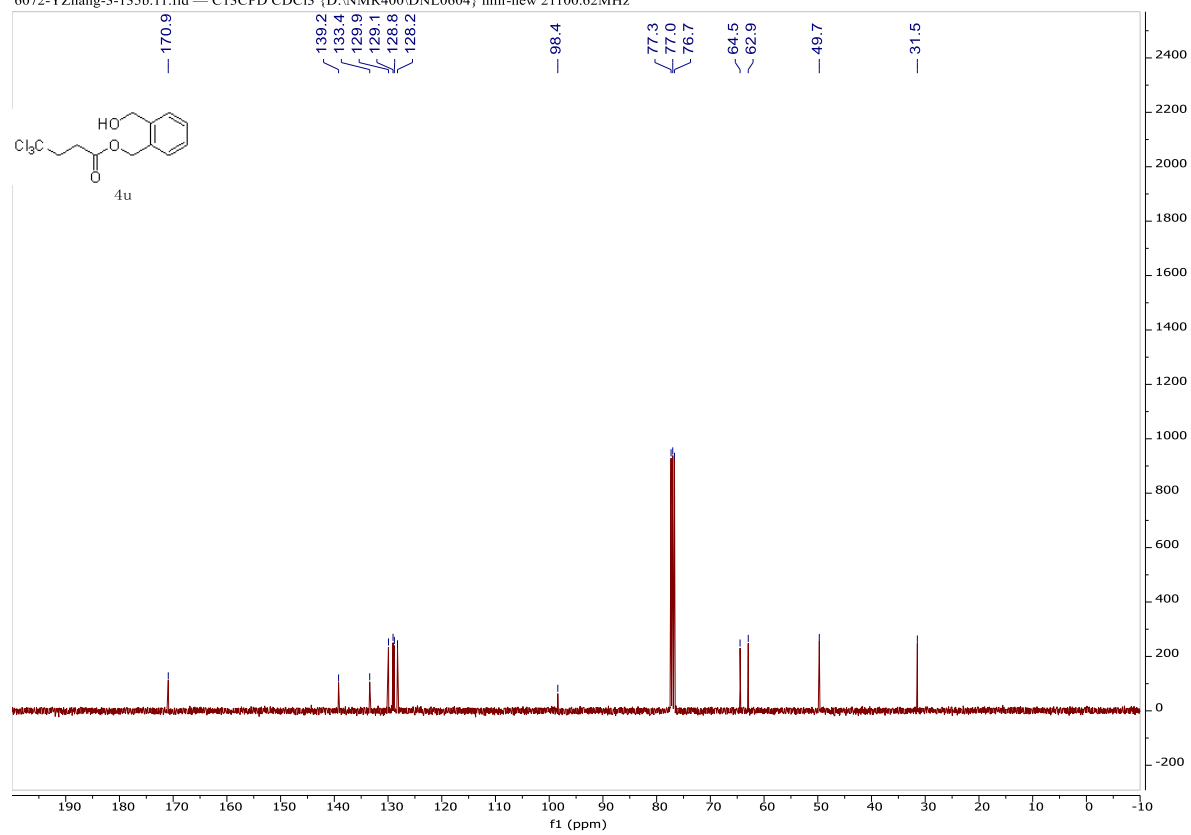

4v

6958-yzhang-3-261.10.fid — PROTON CDCl3 {D:\NMR400\DNL0604} nmr-new 45400.13MHz

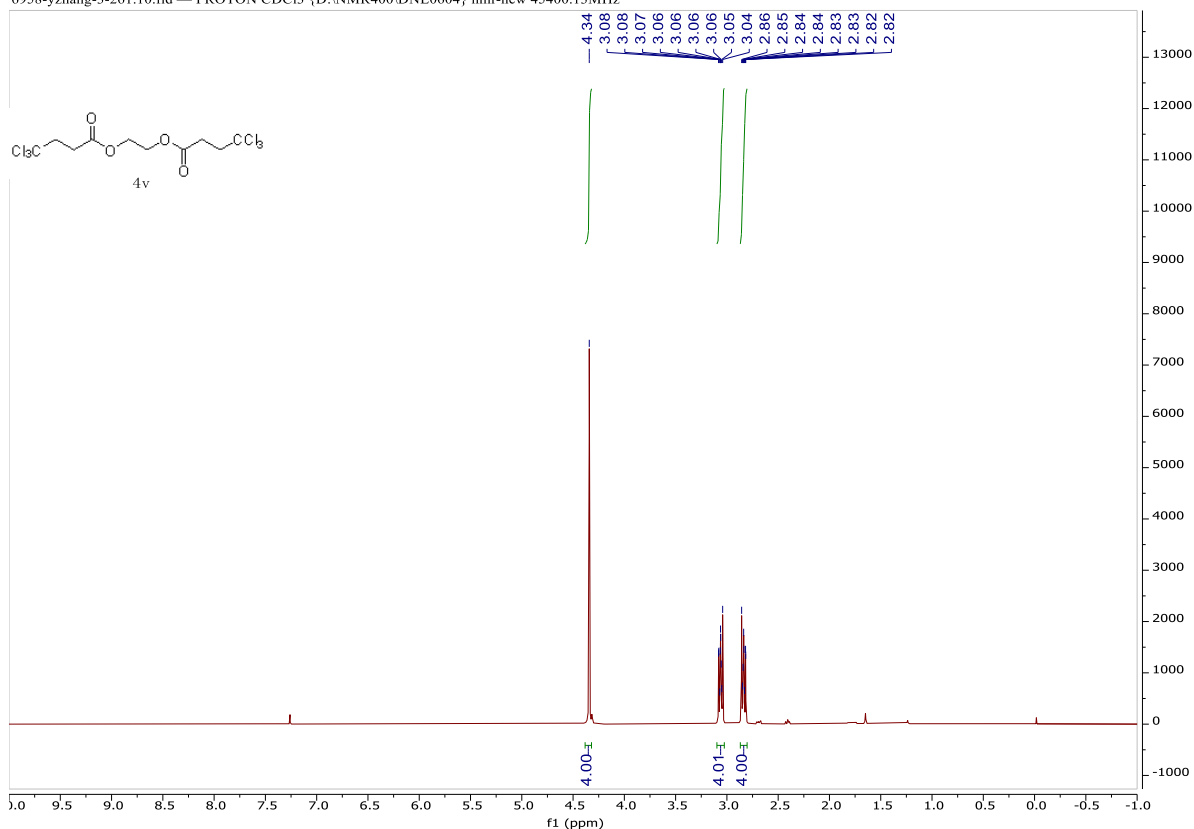

6958-yzhang-3-261.11.fid — C13CPD CDCl3 {D:\NMR400\DNL0604} nmr-new 45100.62MHz

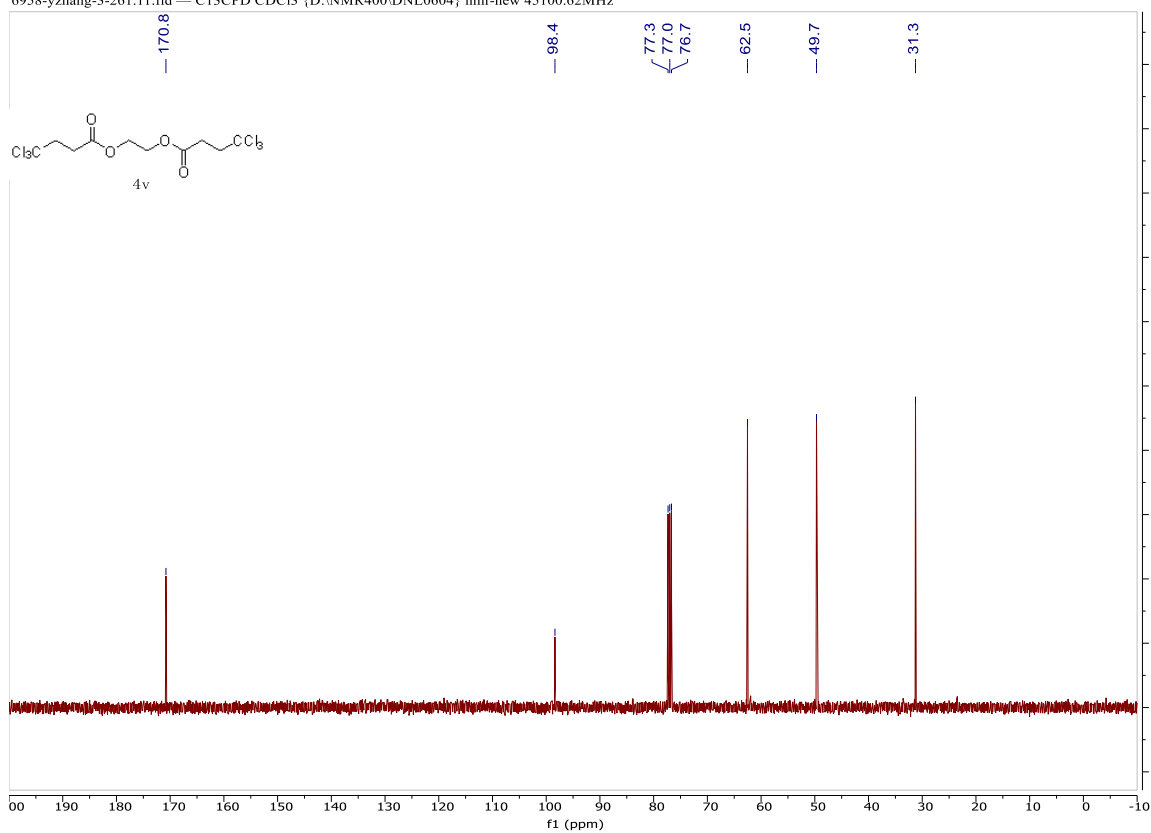

4w

7207-yzhang-3-297a.10.fid — PROTON CDCI3 {D:\NMR400\DNL0604} nmr-new 37400.13MHz

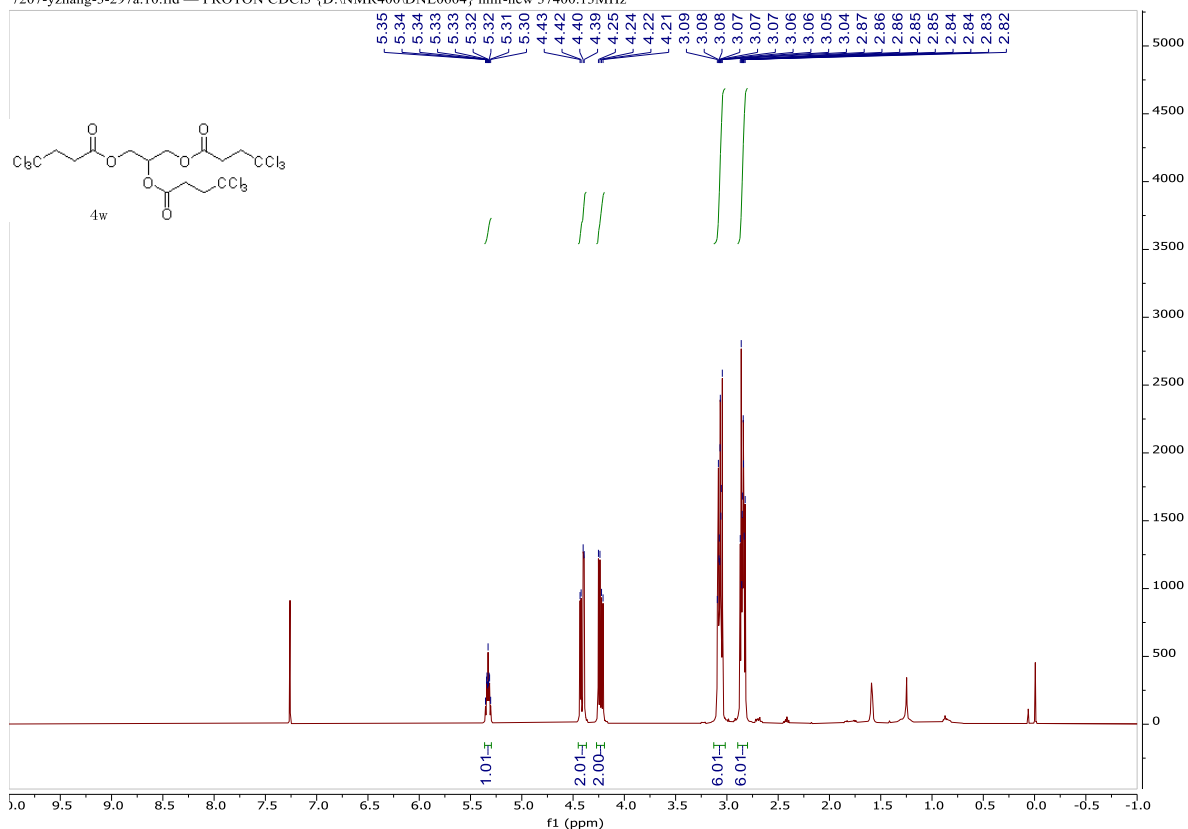

7207-yzhang-3-297a.11.fid — C13CPD CDCI3 {D:\NMR400\DNL0604} nmr-new 37100.62MHz

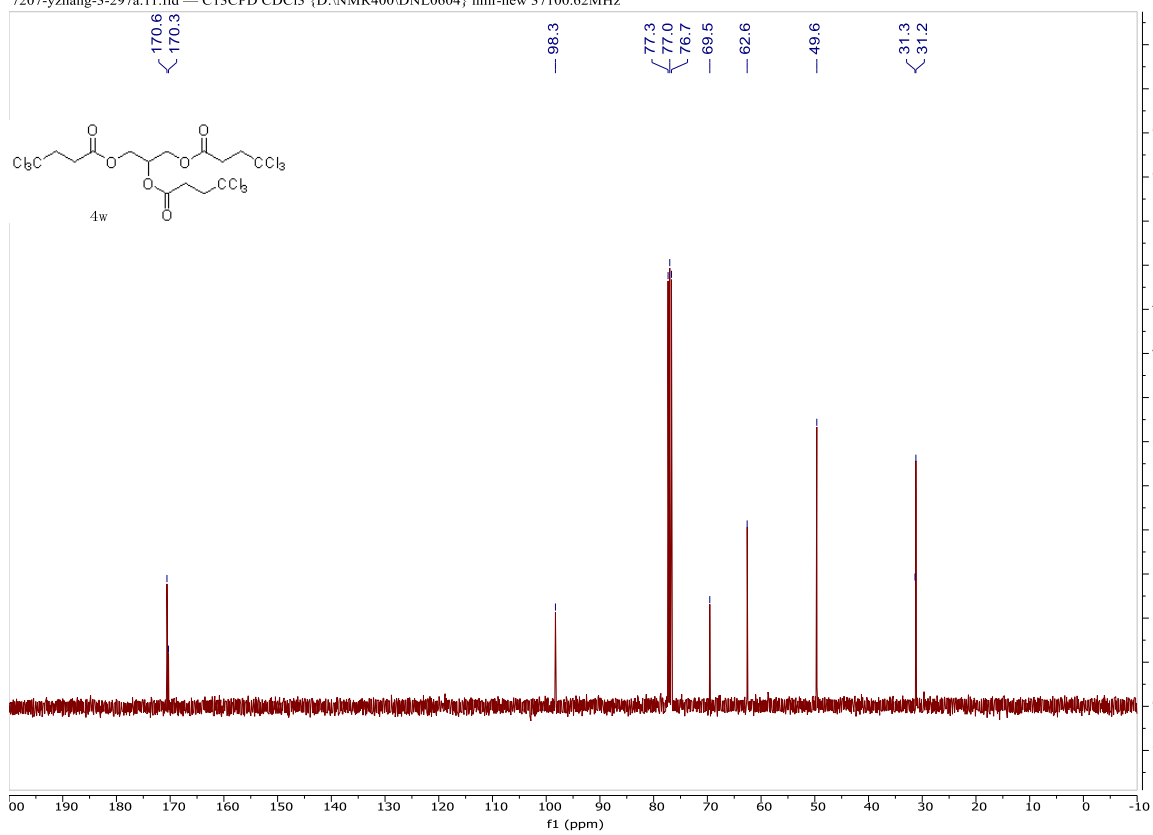

5a

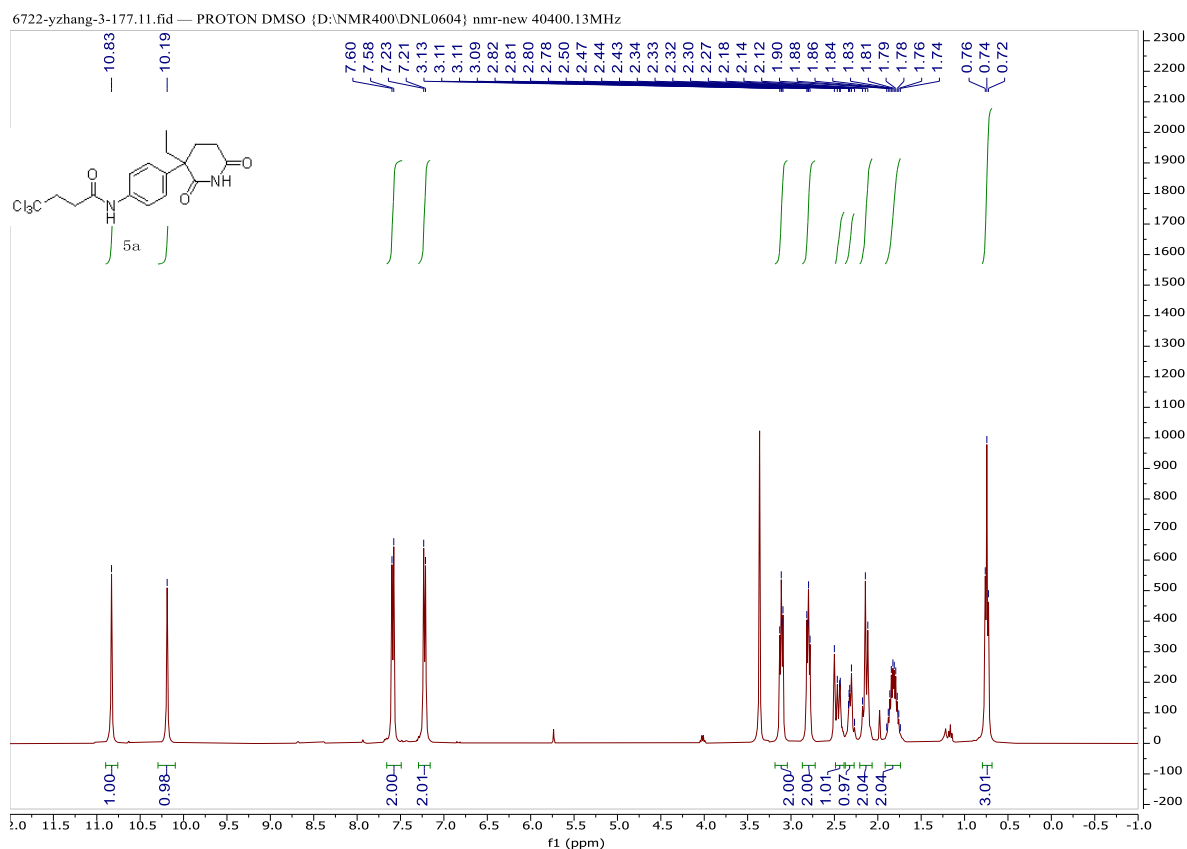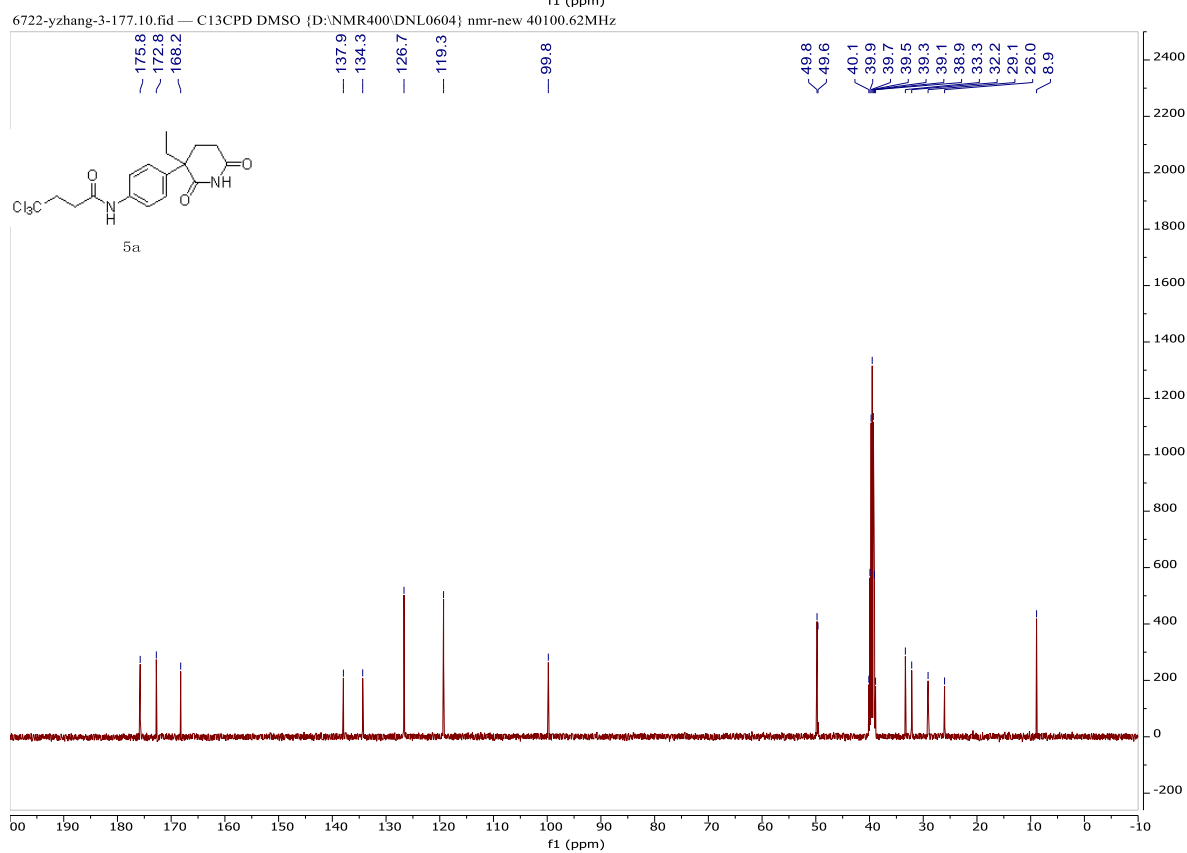

5b

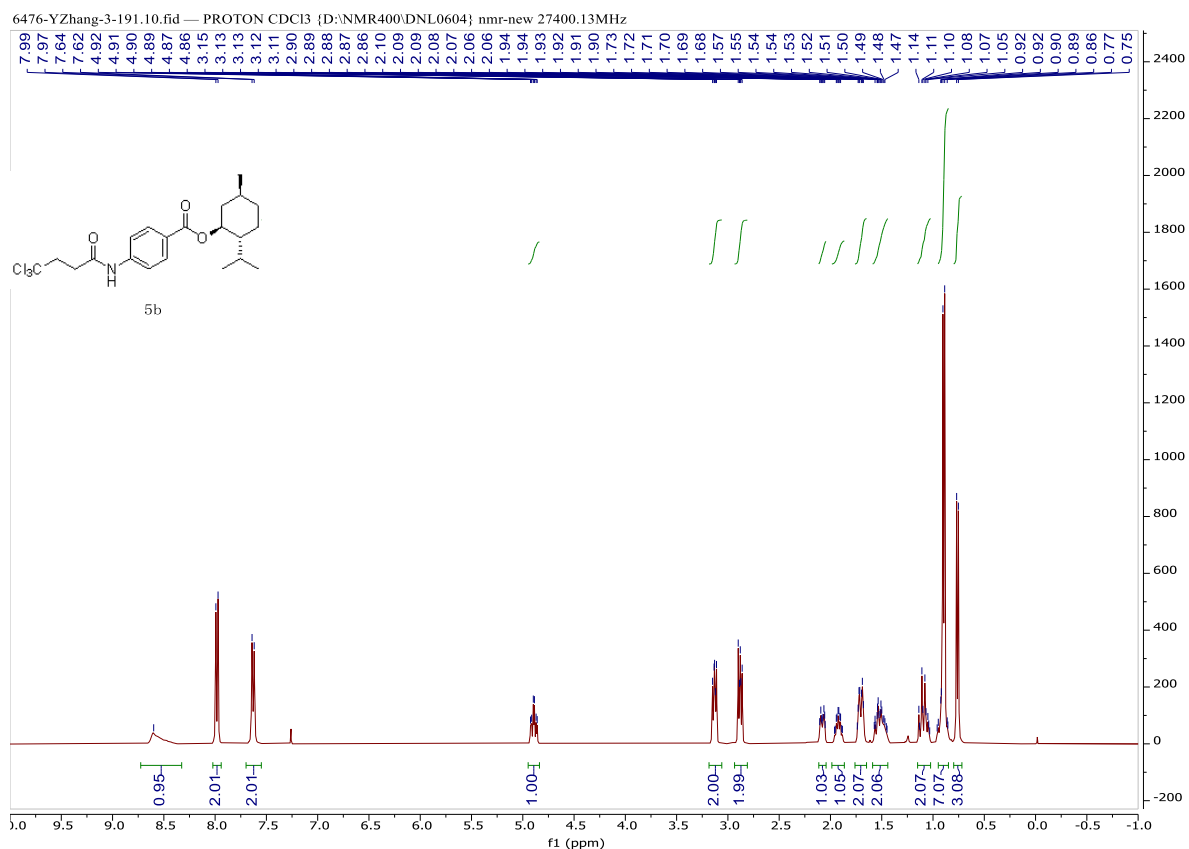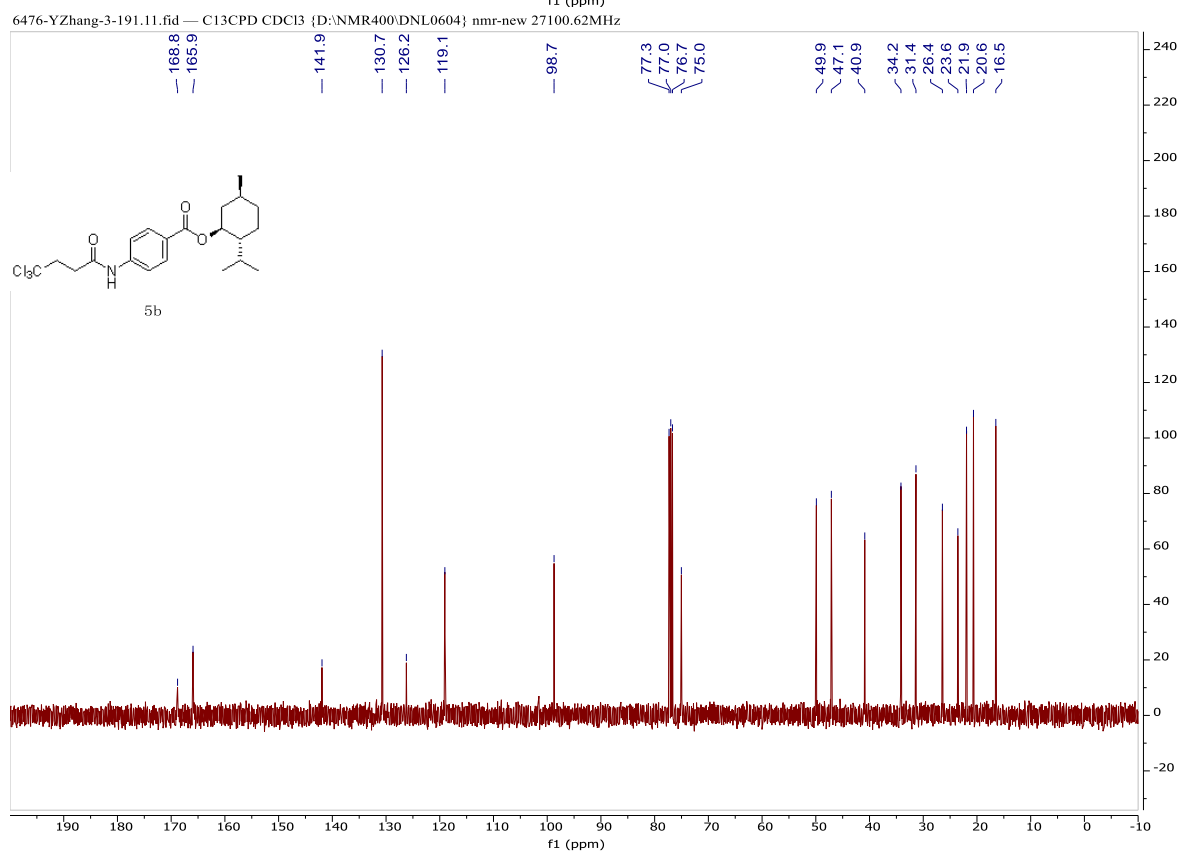

5c

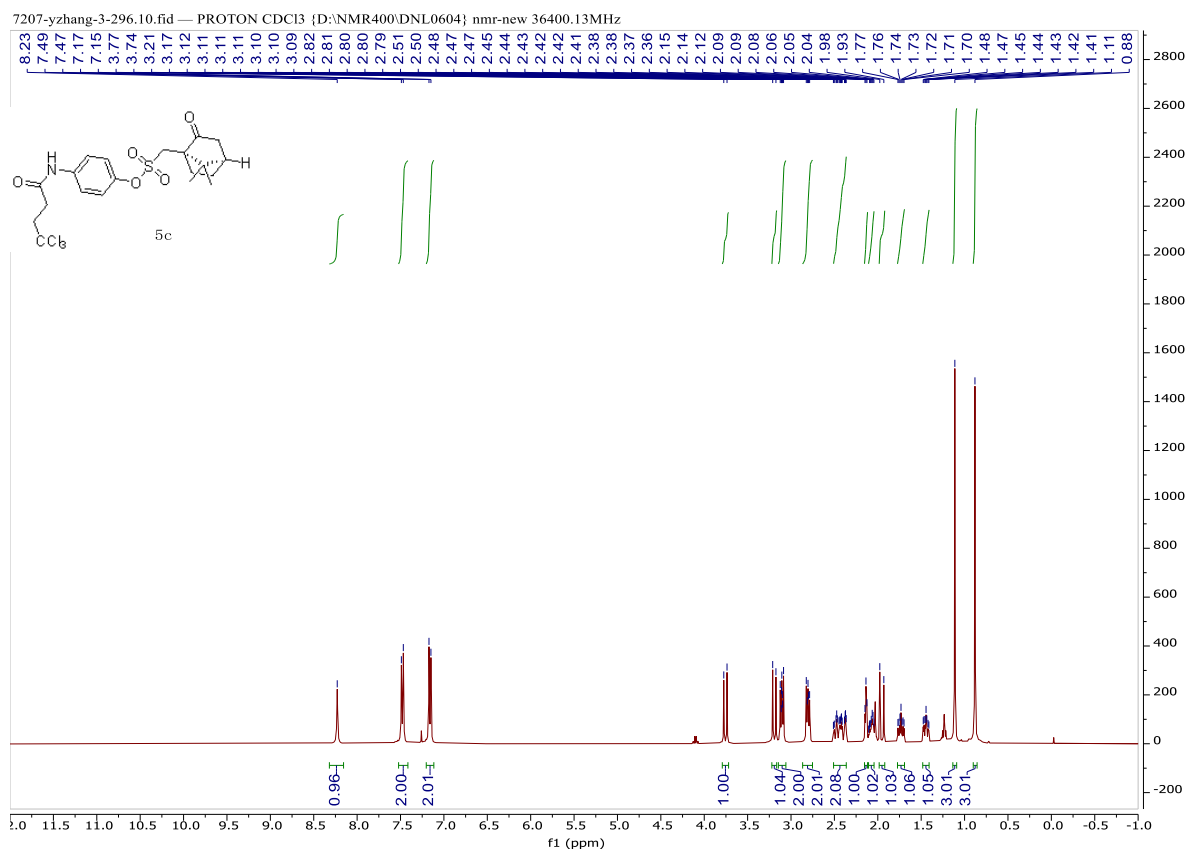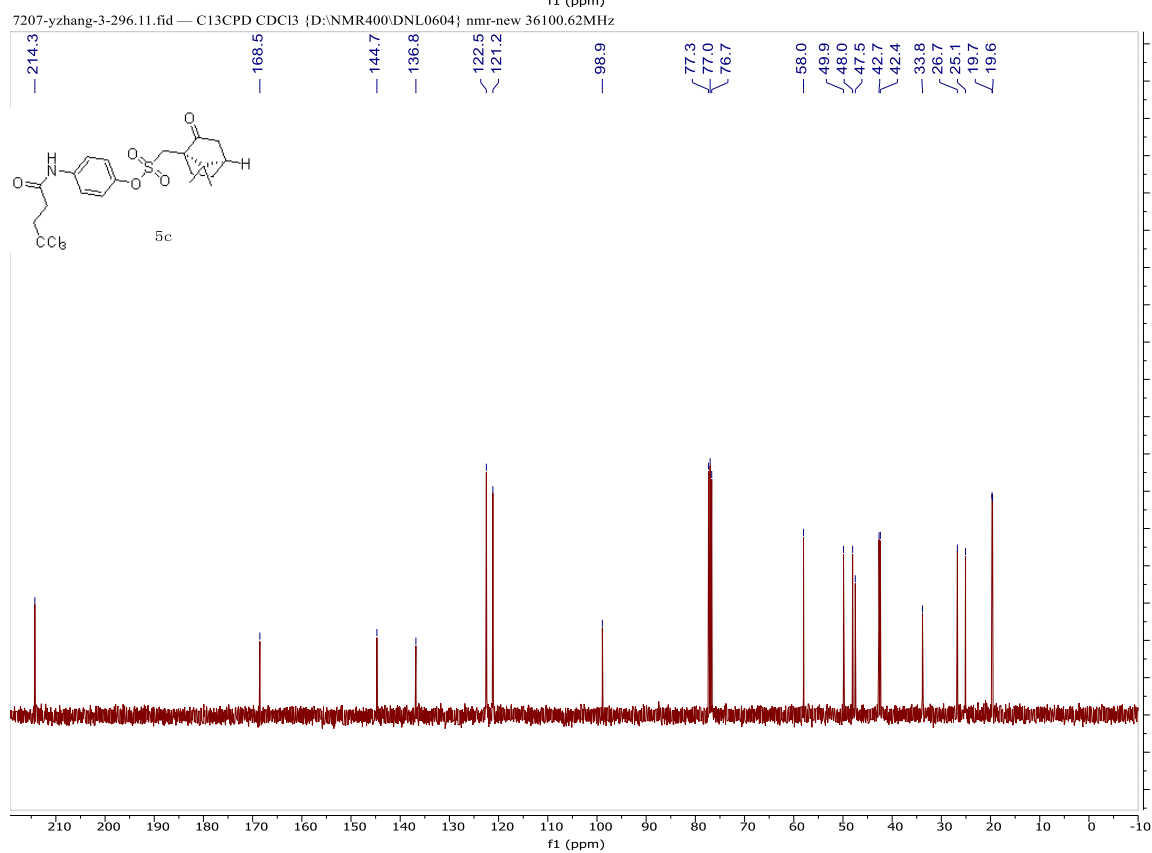



5d

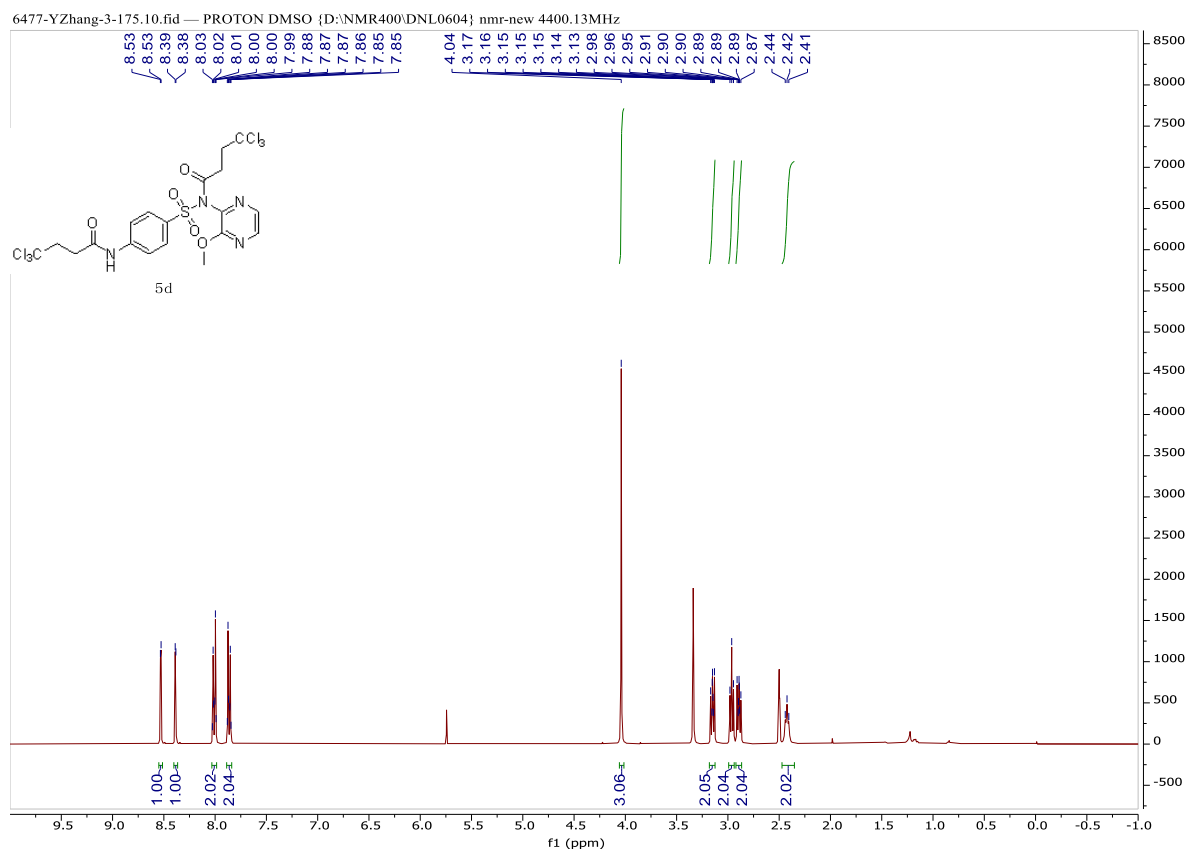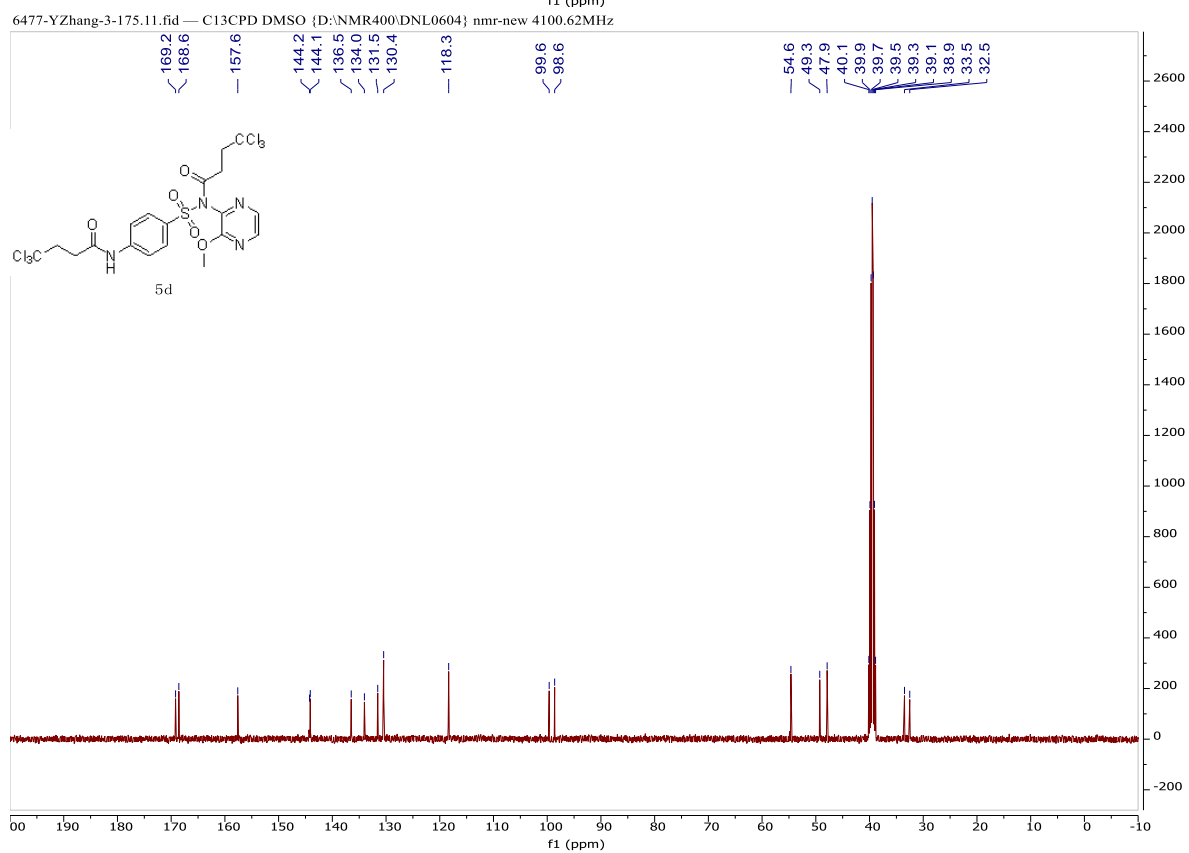

5e

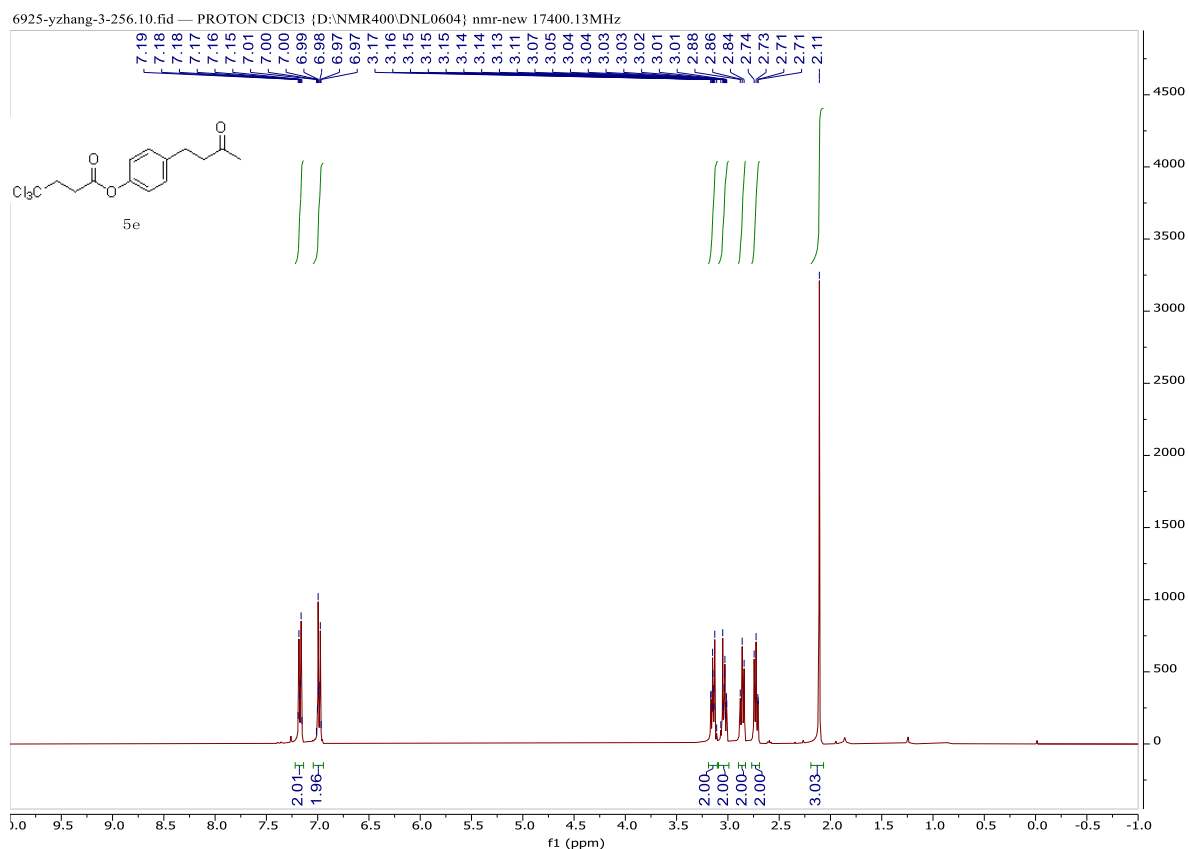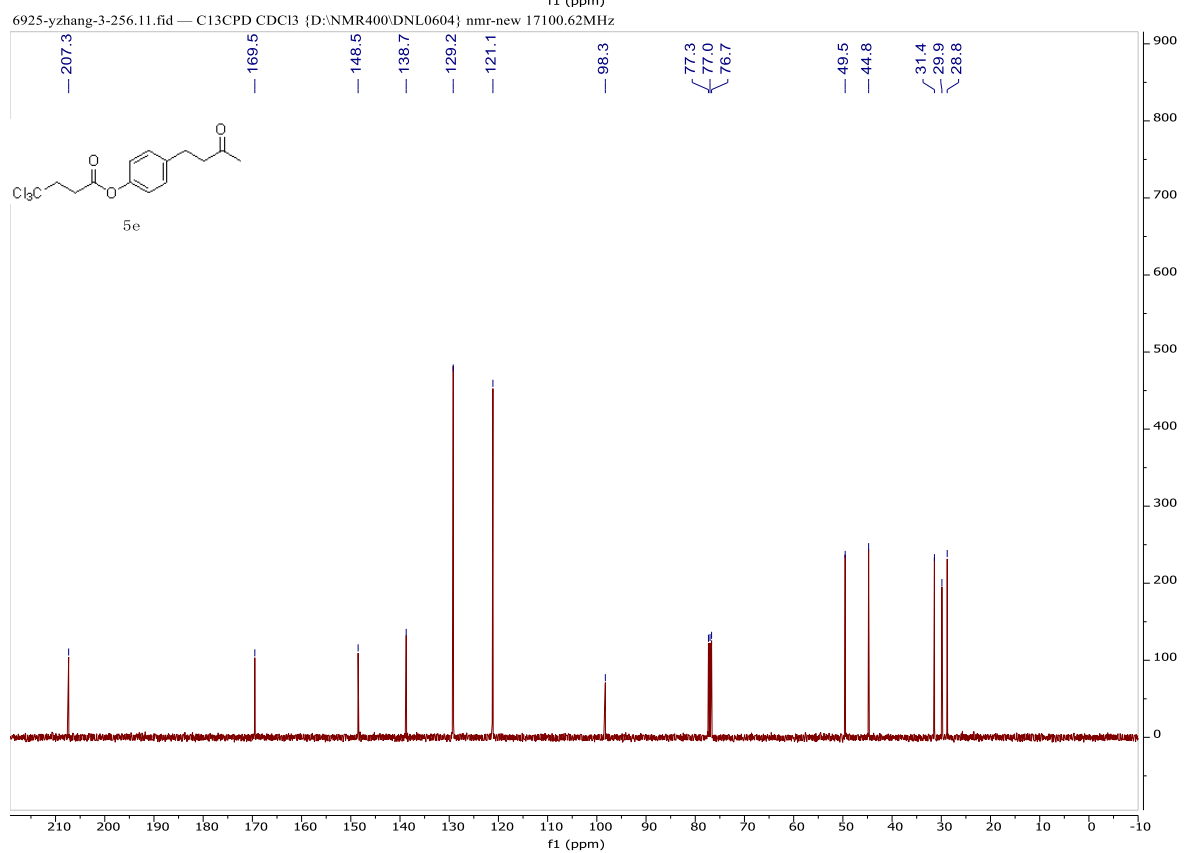

5f

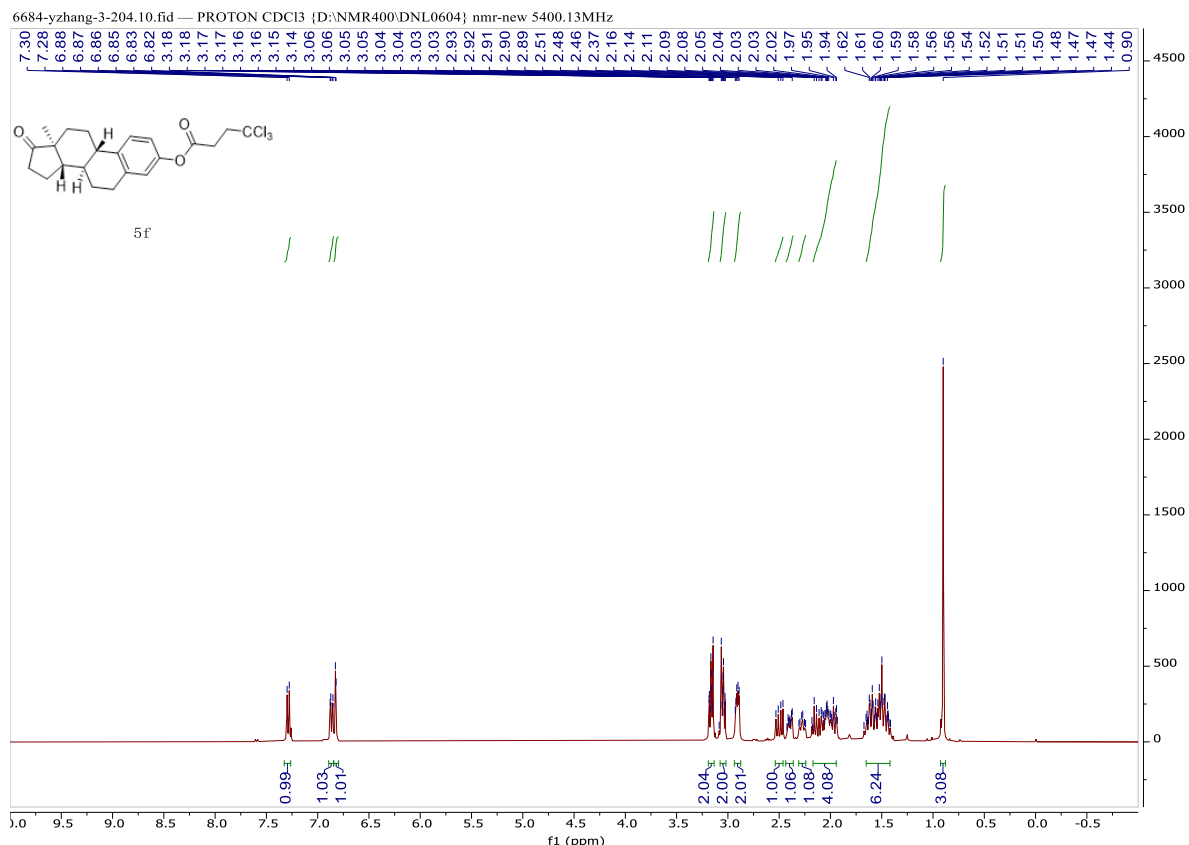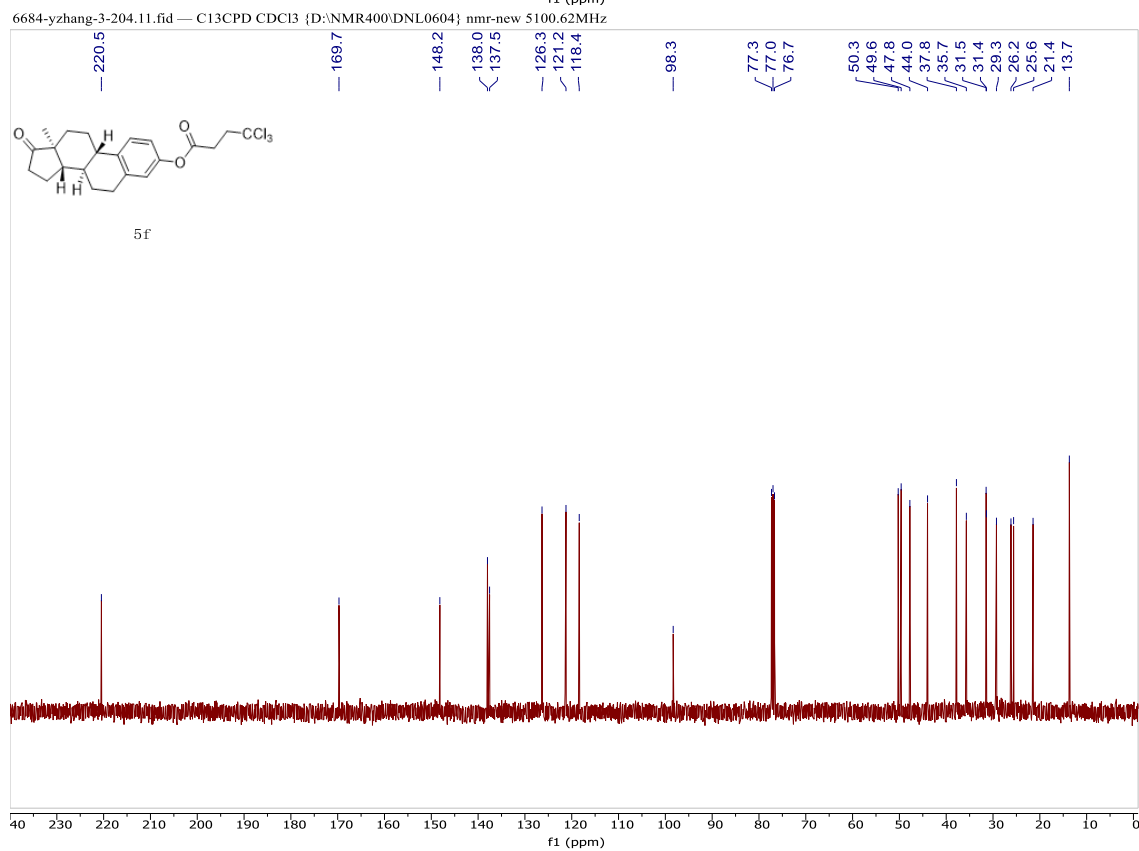

5g

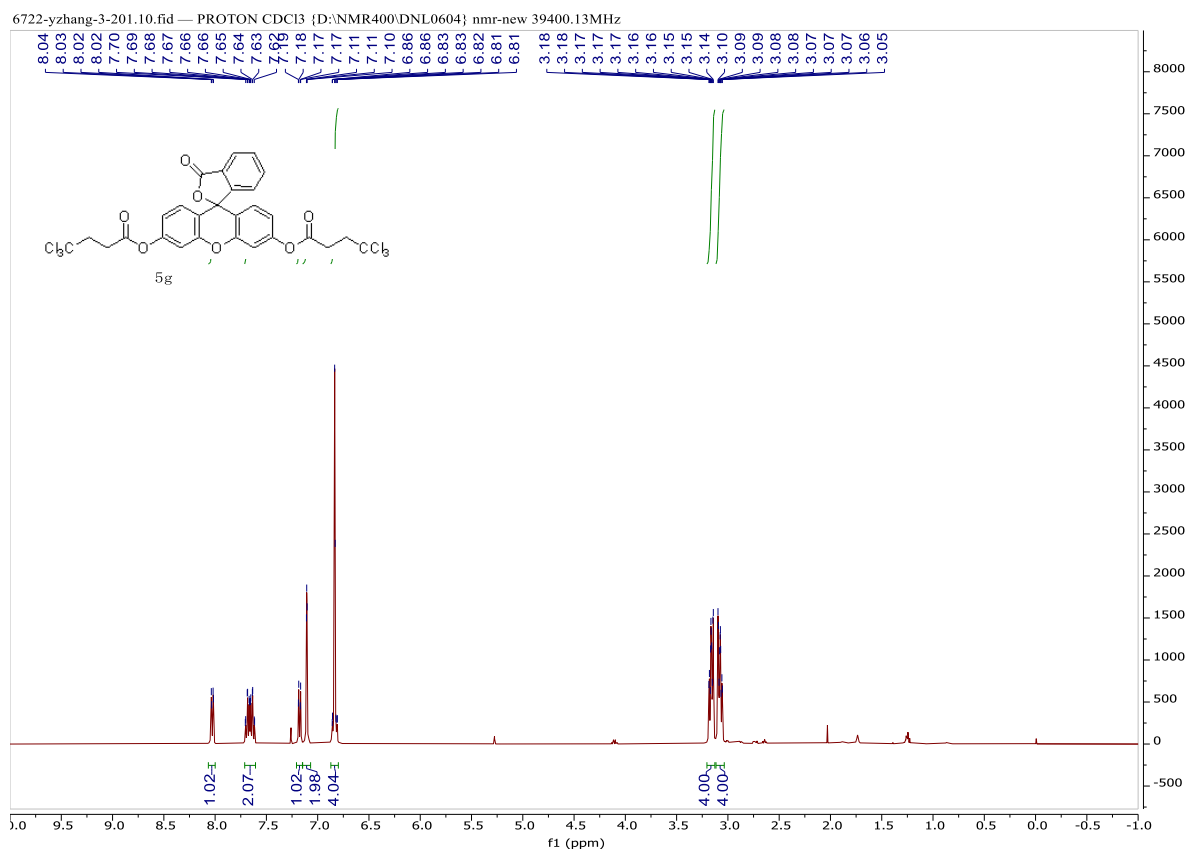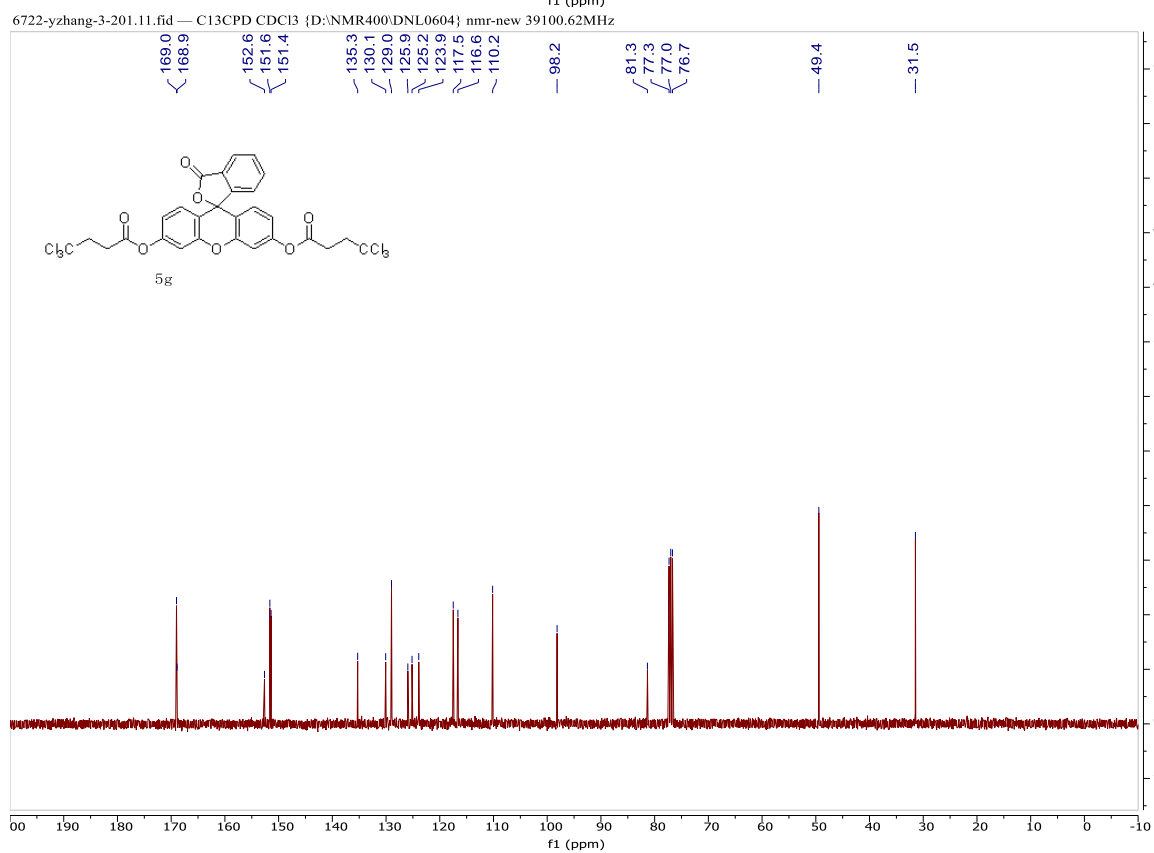

5h

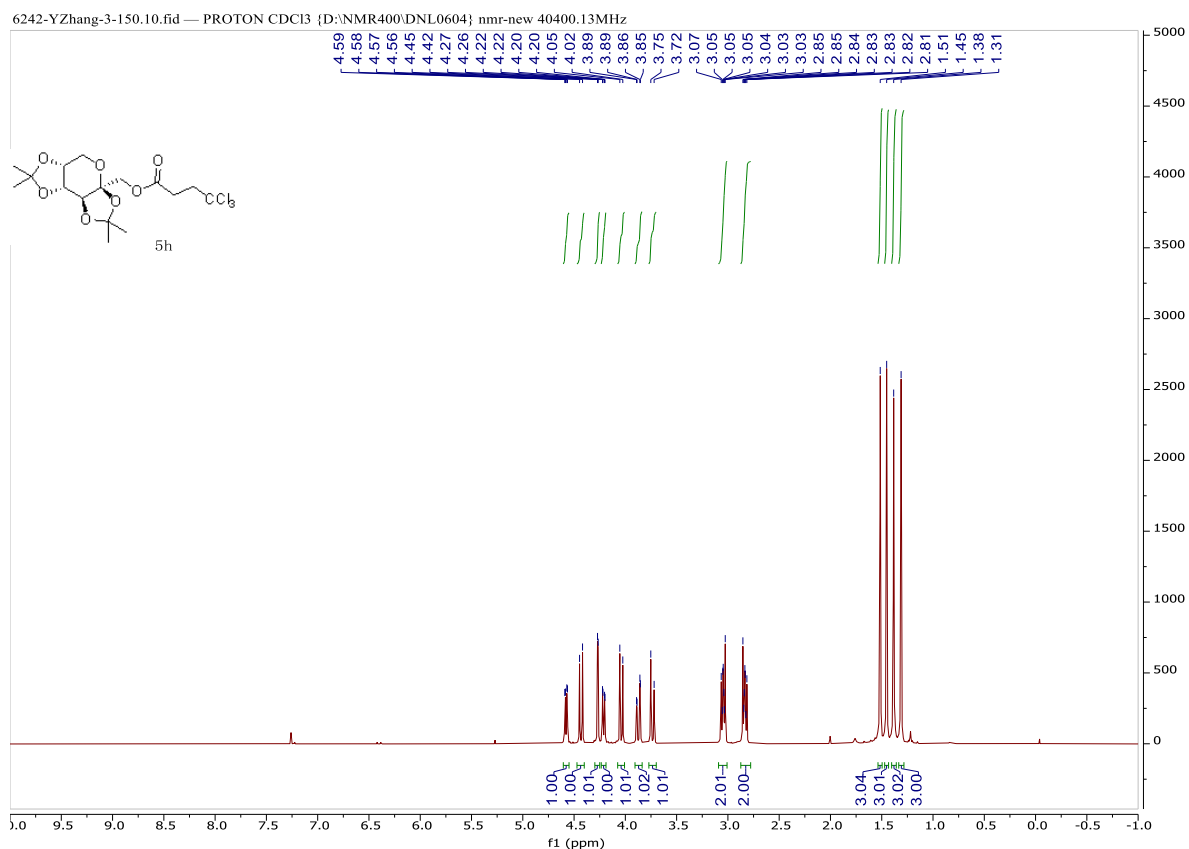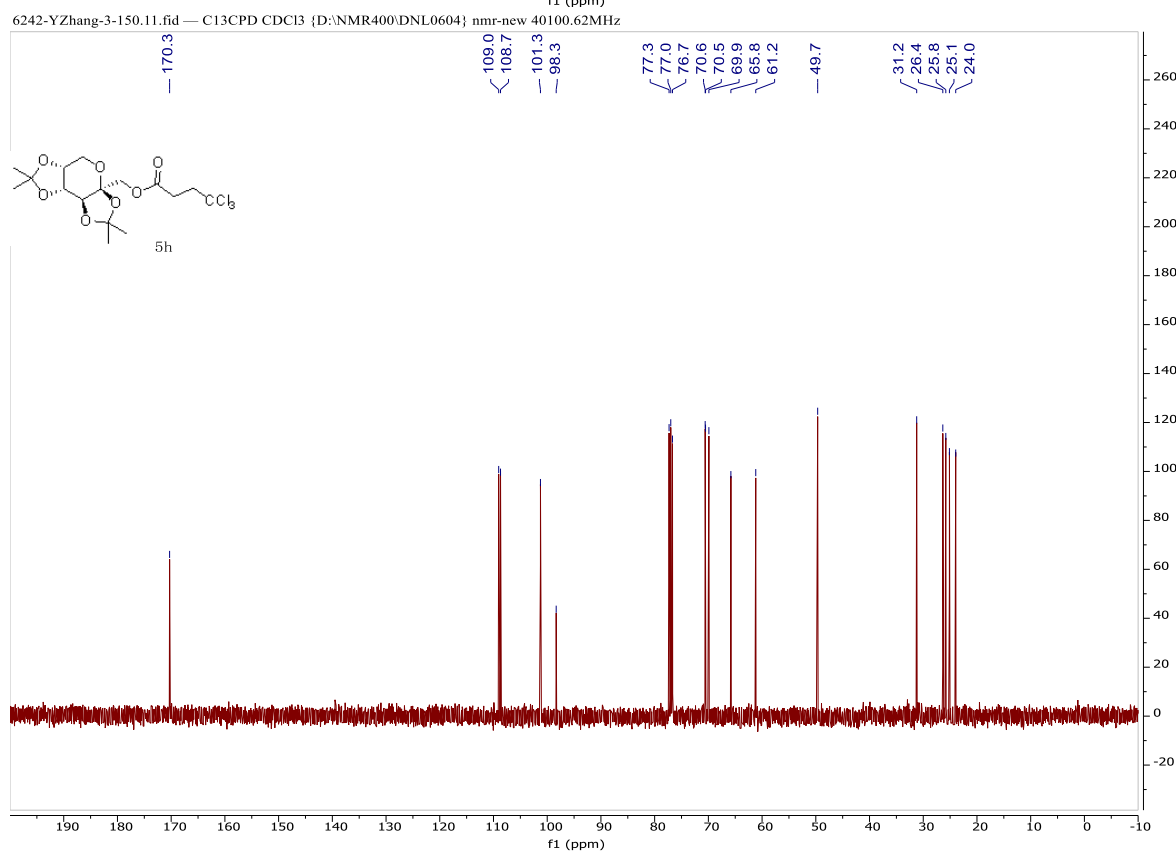

5i

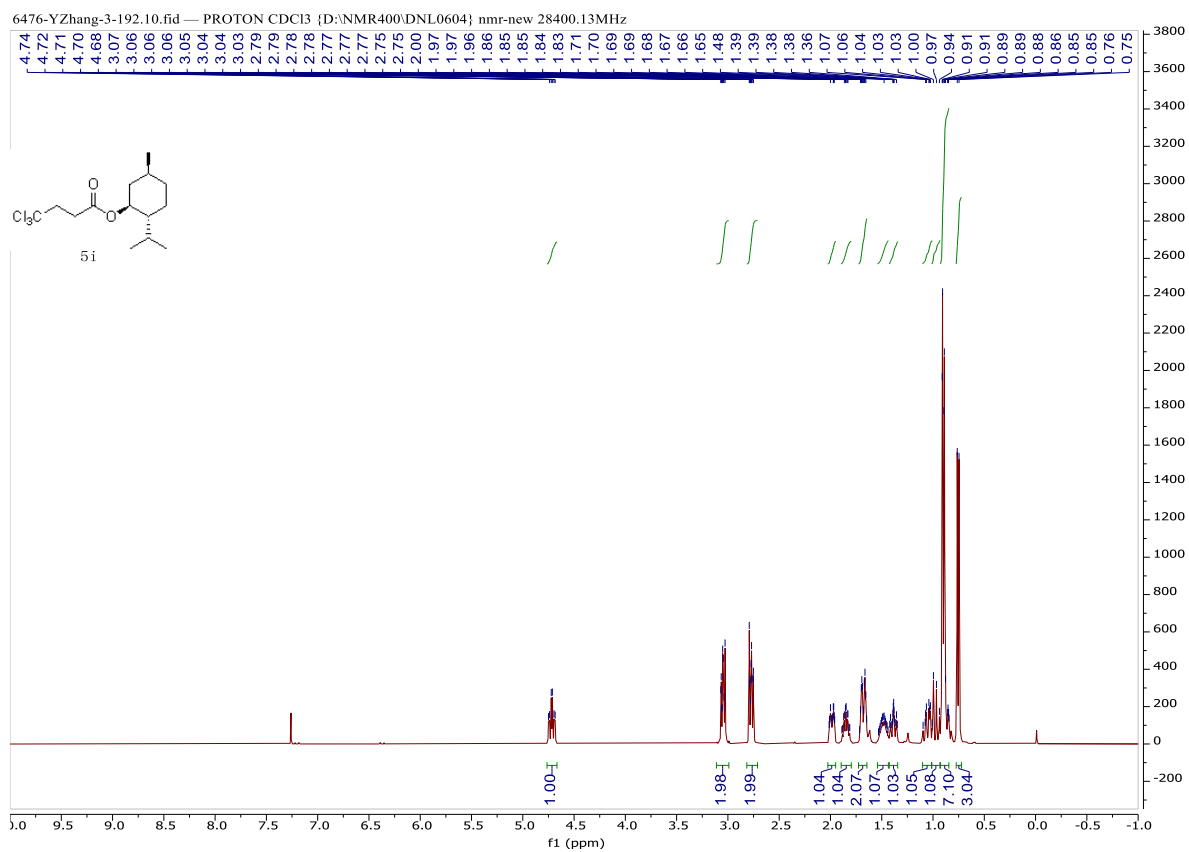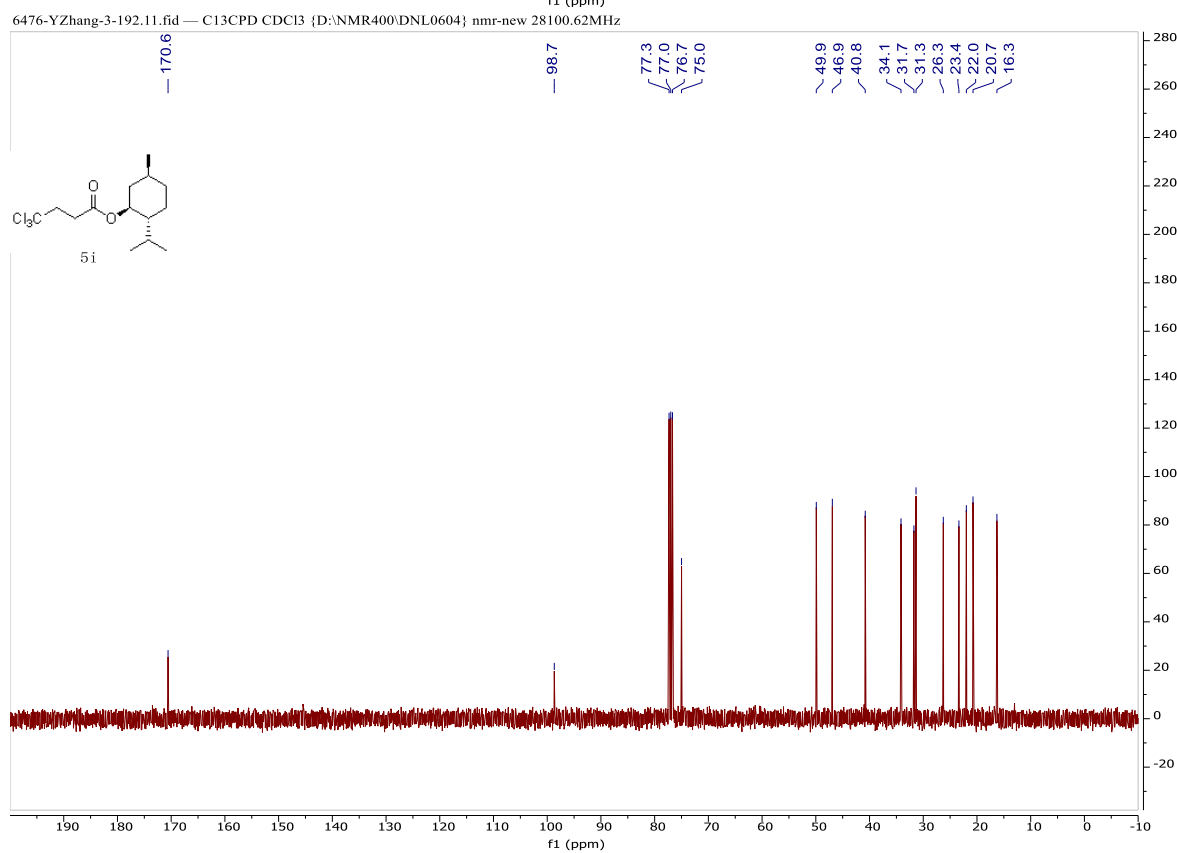

5j

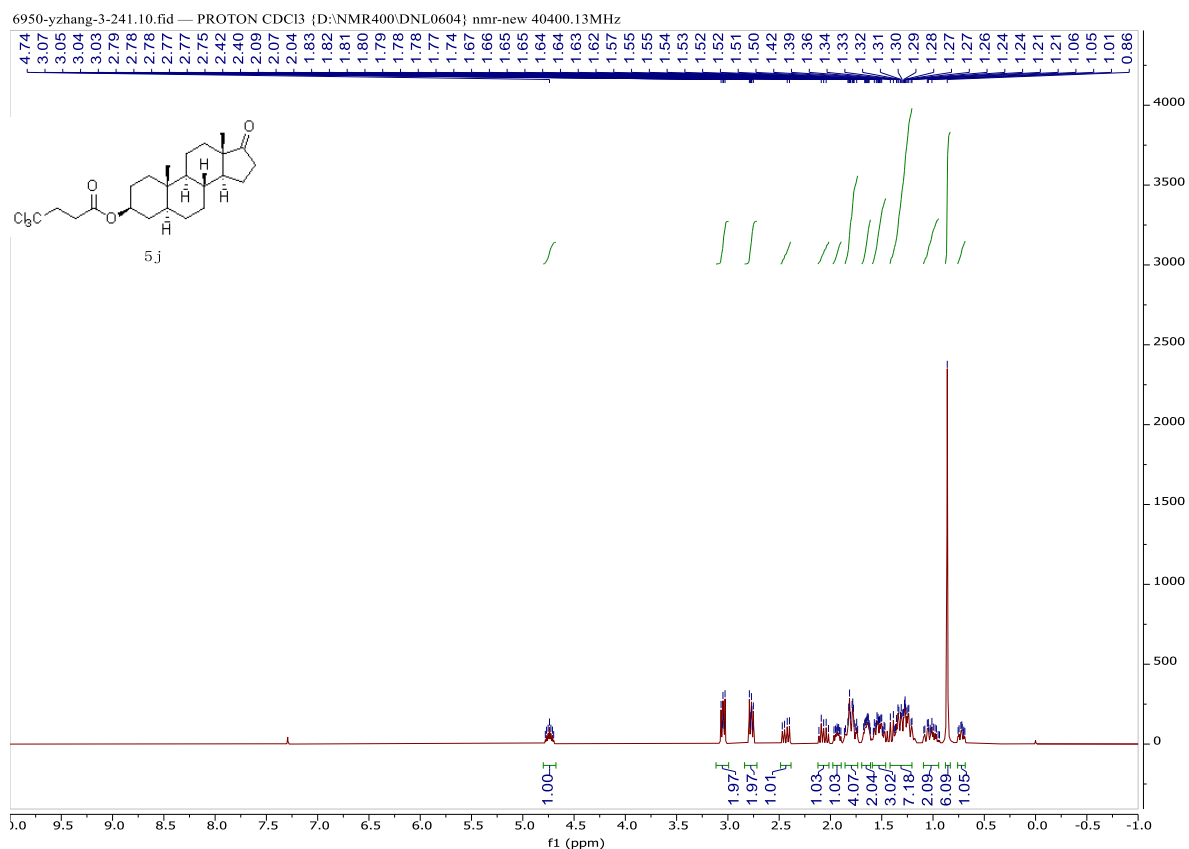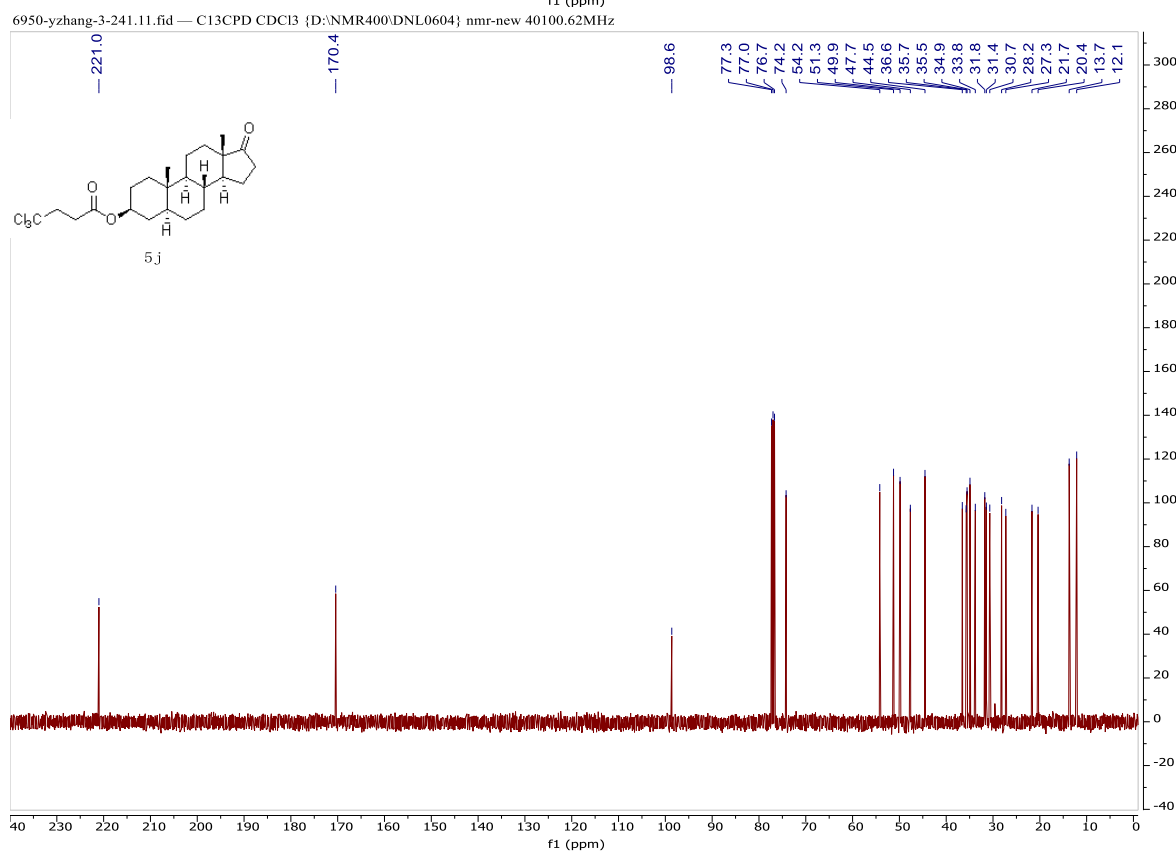

5k

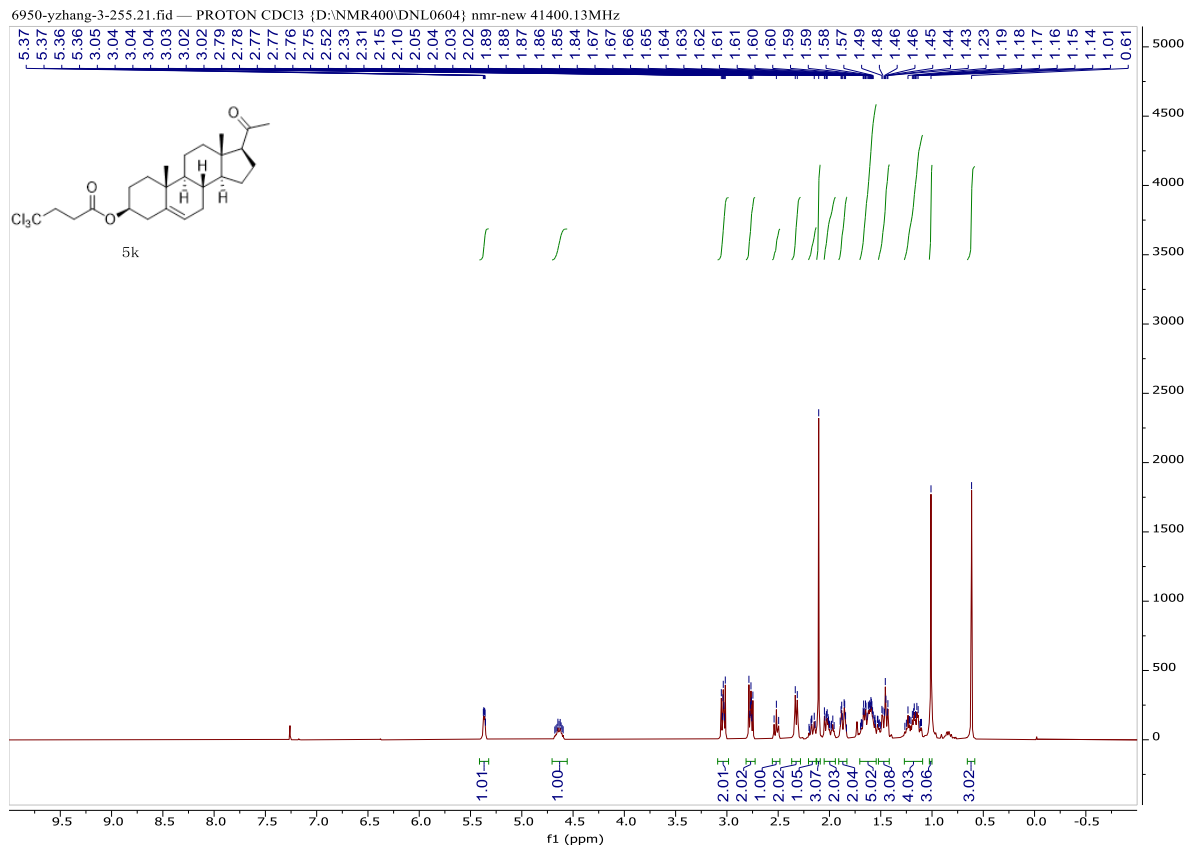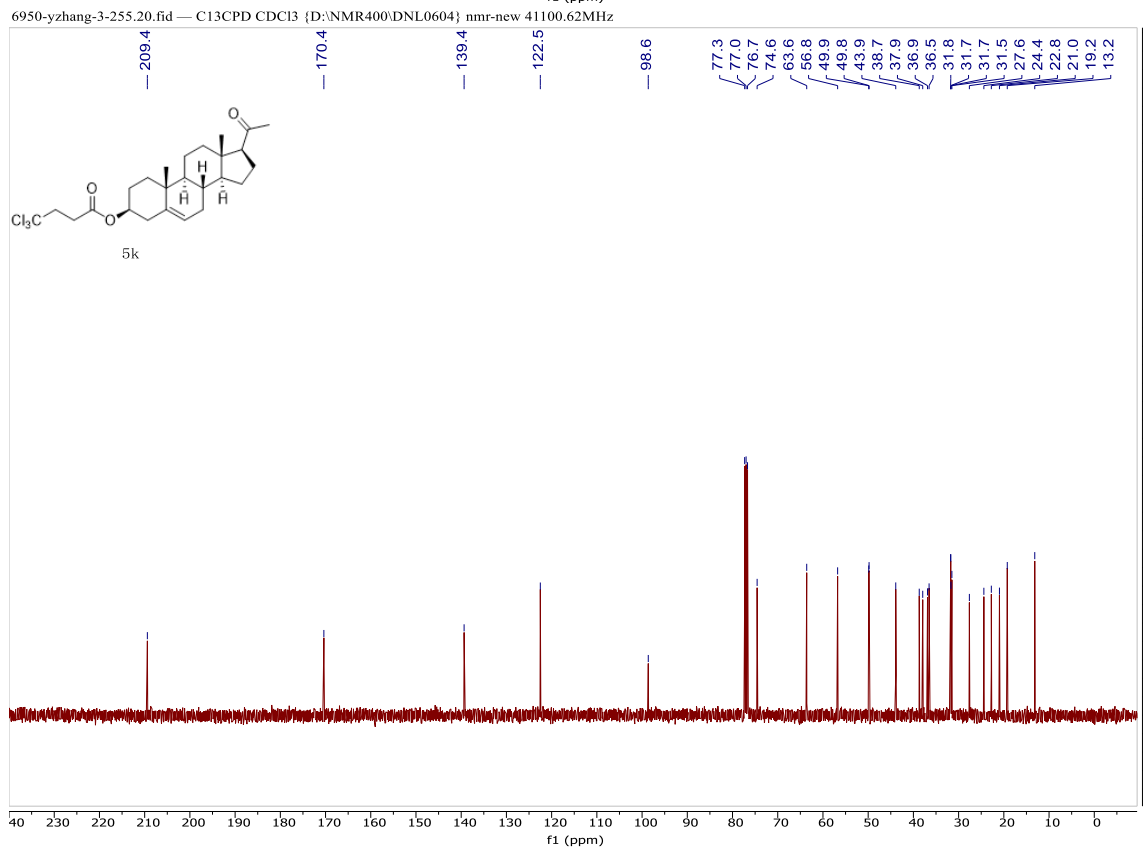



51

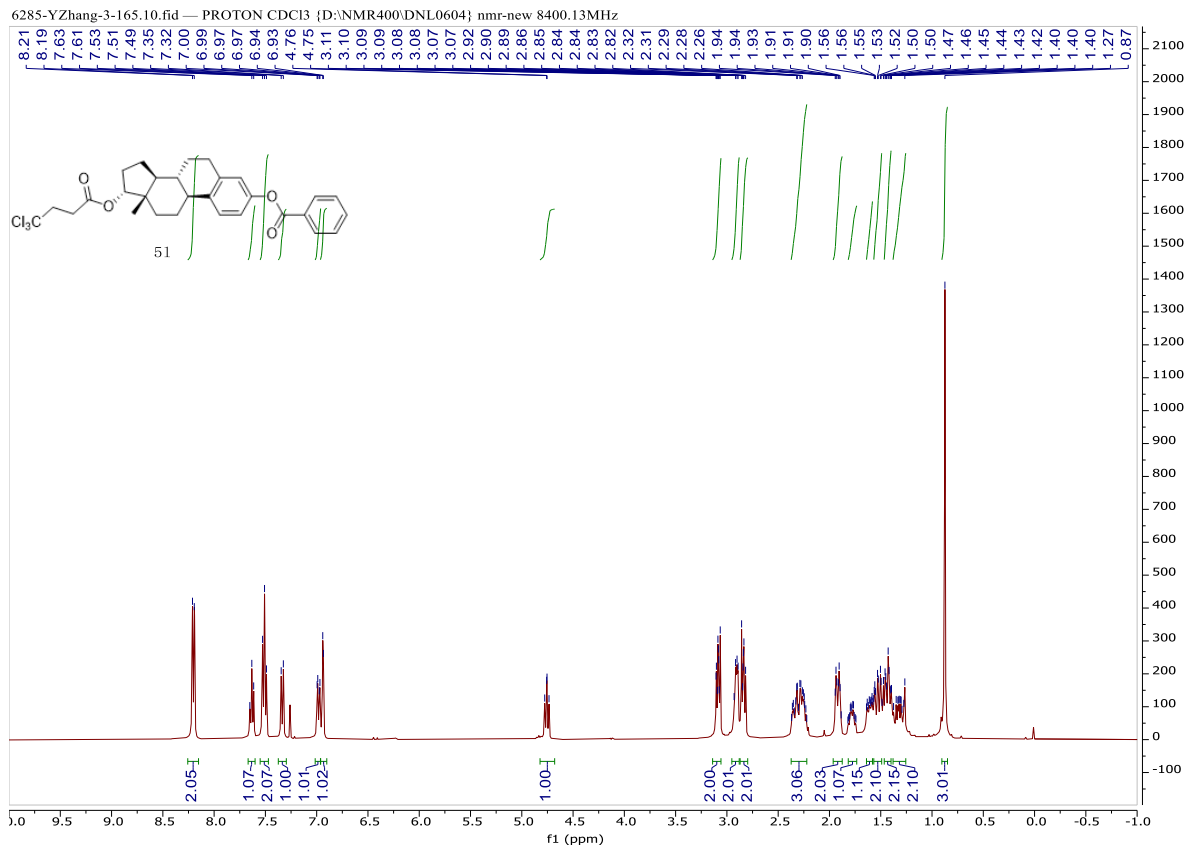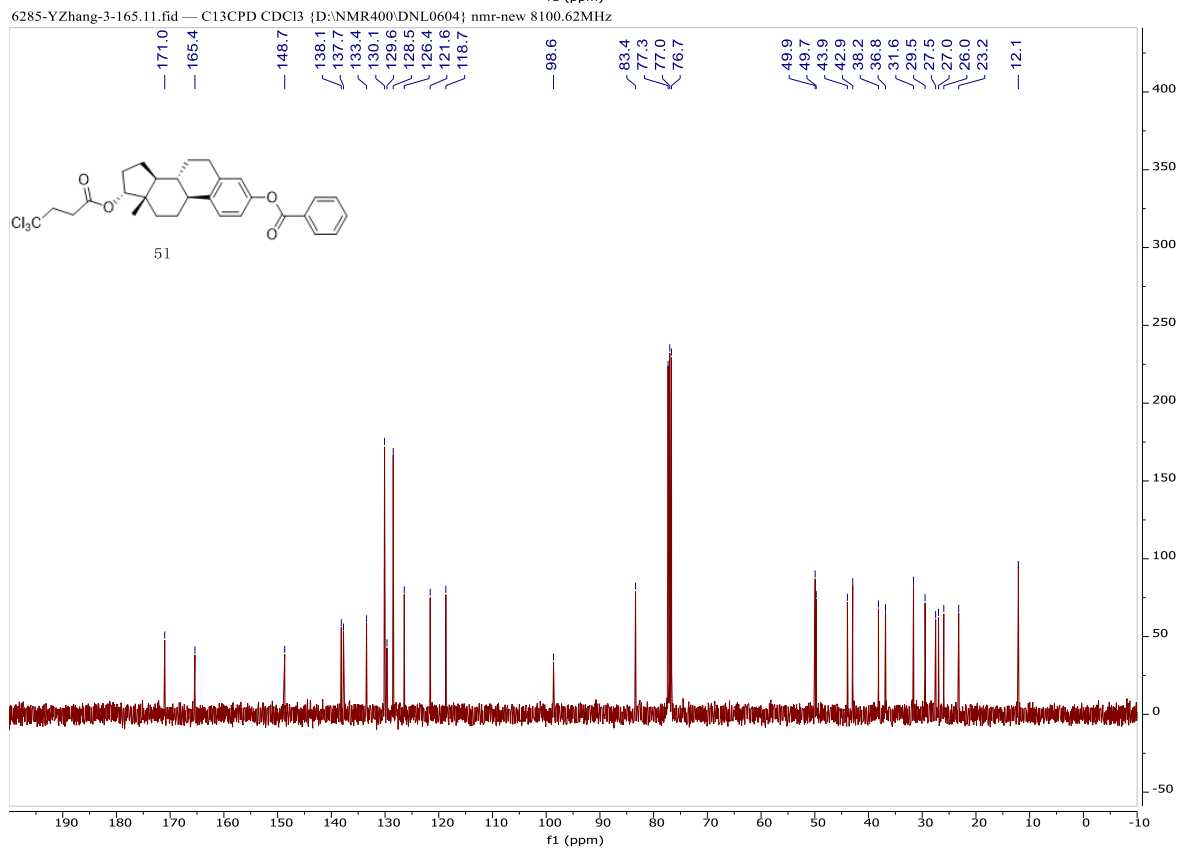

5m

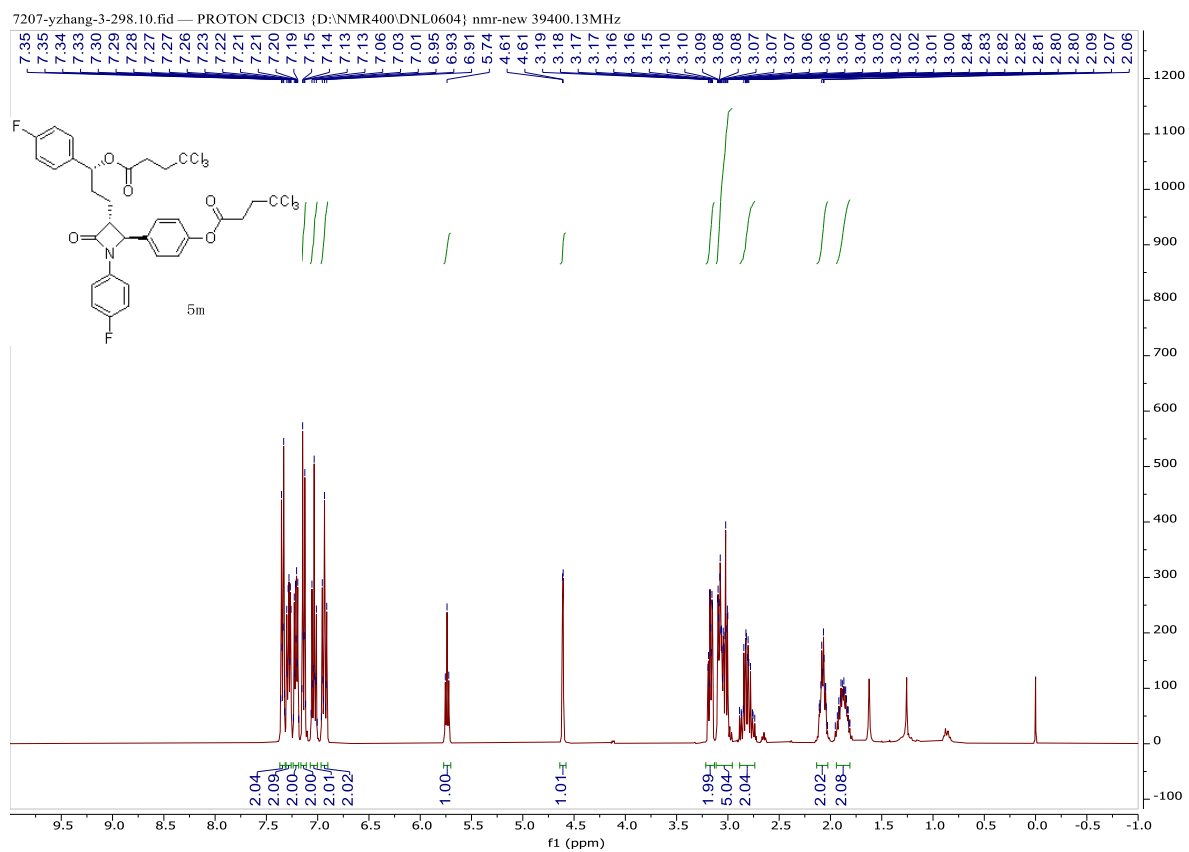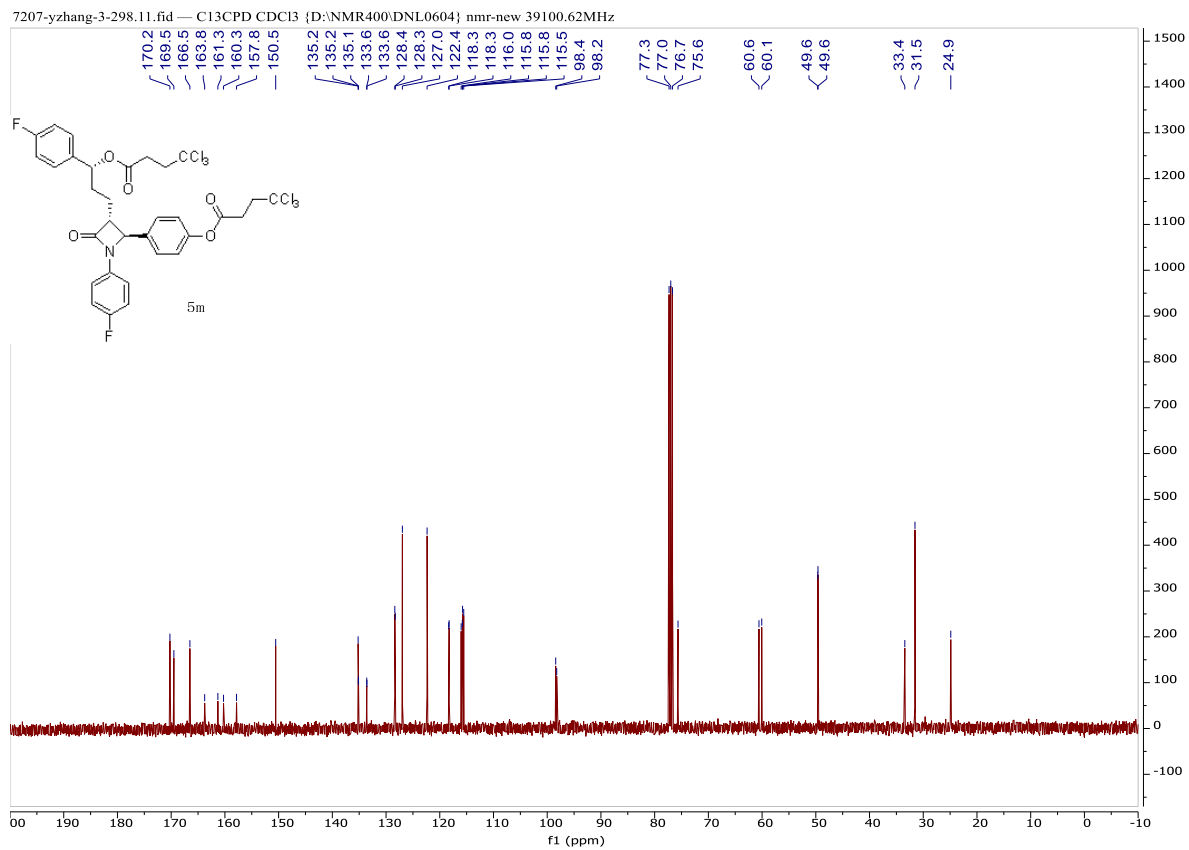

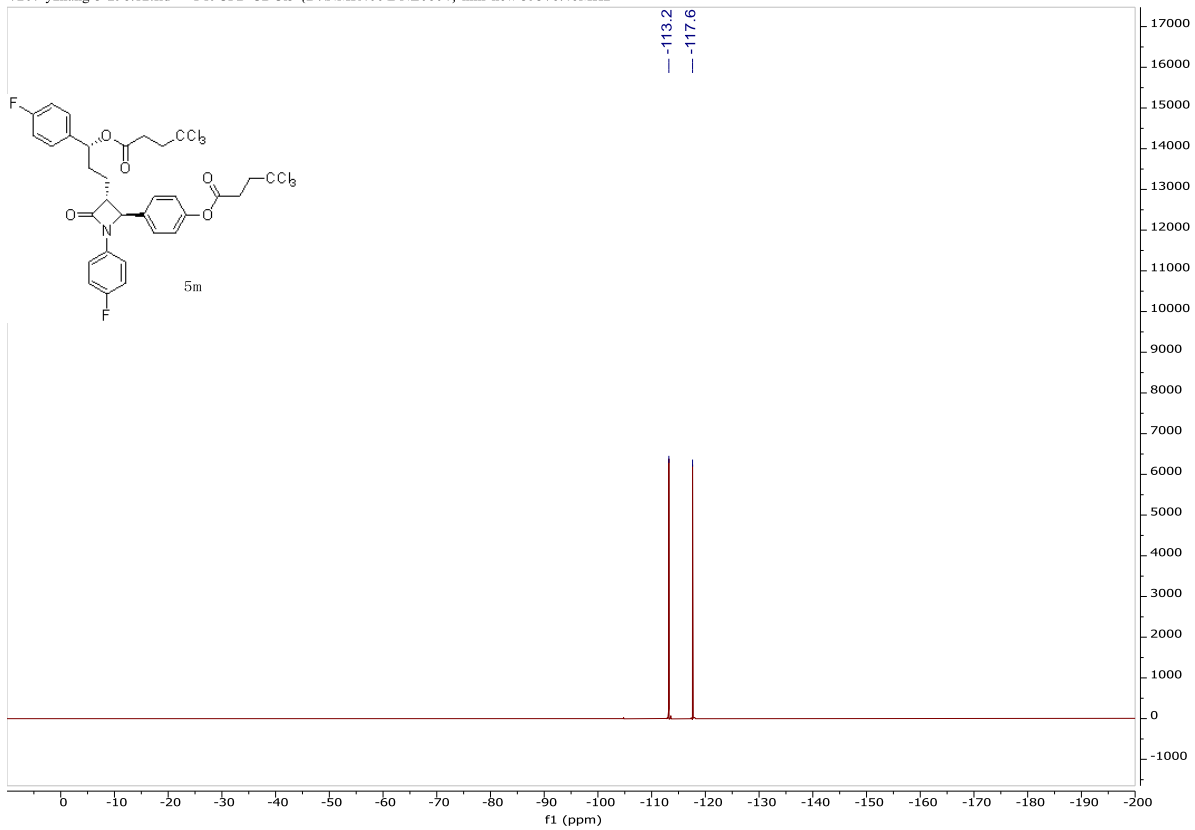

## 6a

7481-yzhang-3-335b.10.fid — PROTON CDCl3 {D:\NMR400\DNL0604} nmr-new 32400.13MHz

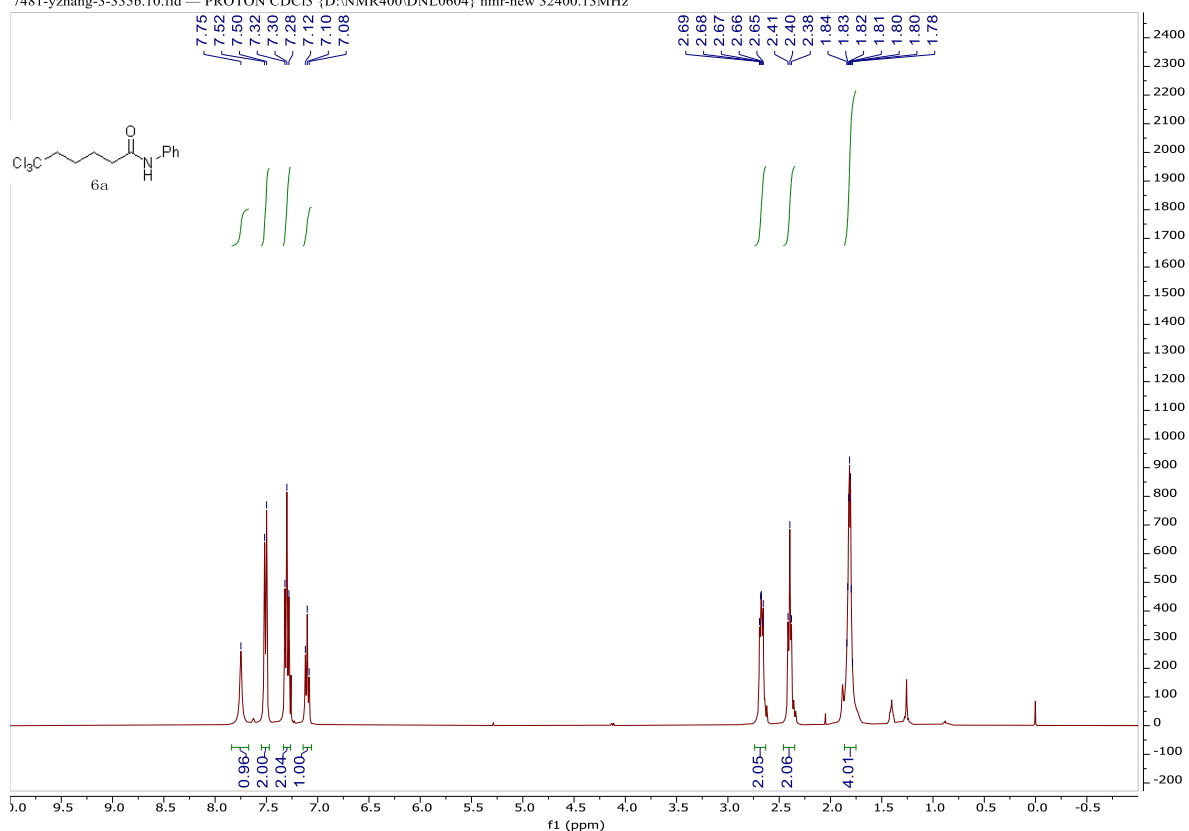

7481-yzhang-3-335b.11.fid — C13CPD CDCl3 {D:\NMR400\DNL0604} nmr-new 32100.62MHz

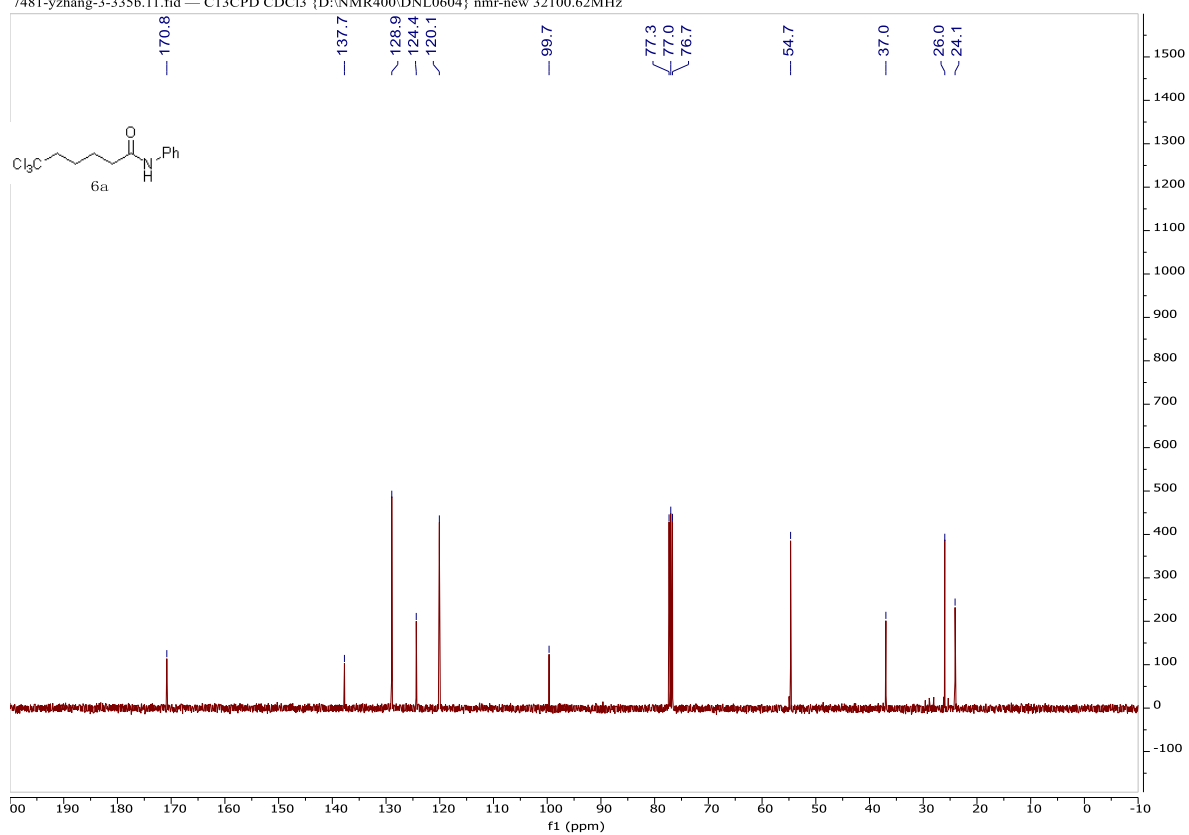

6b

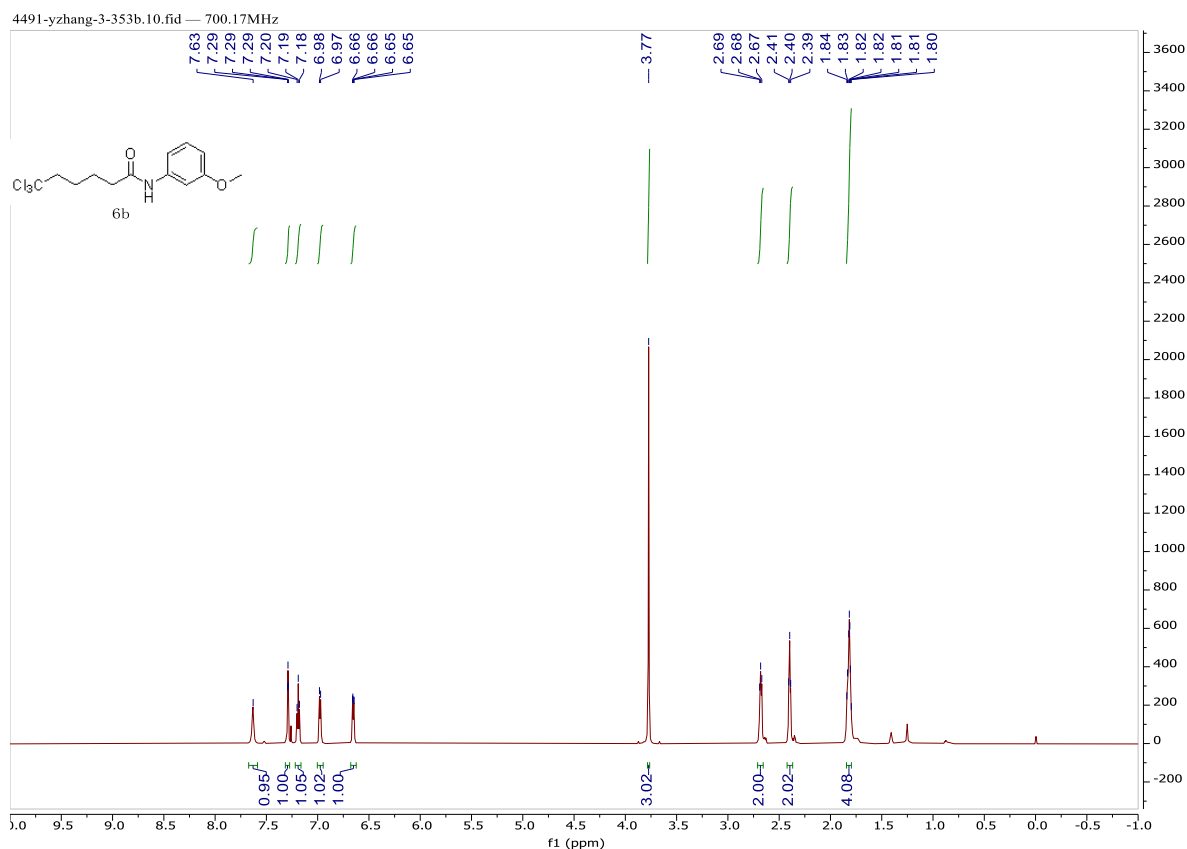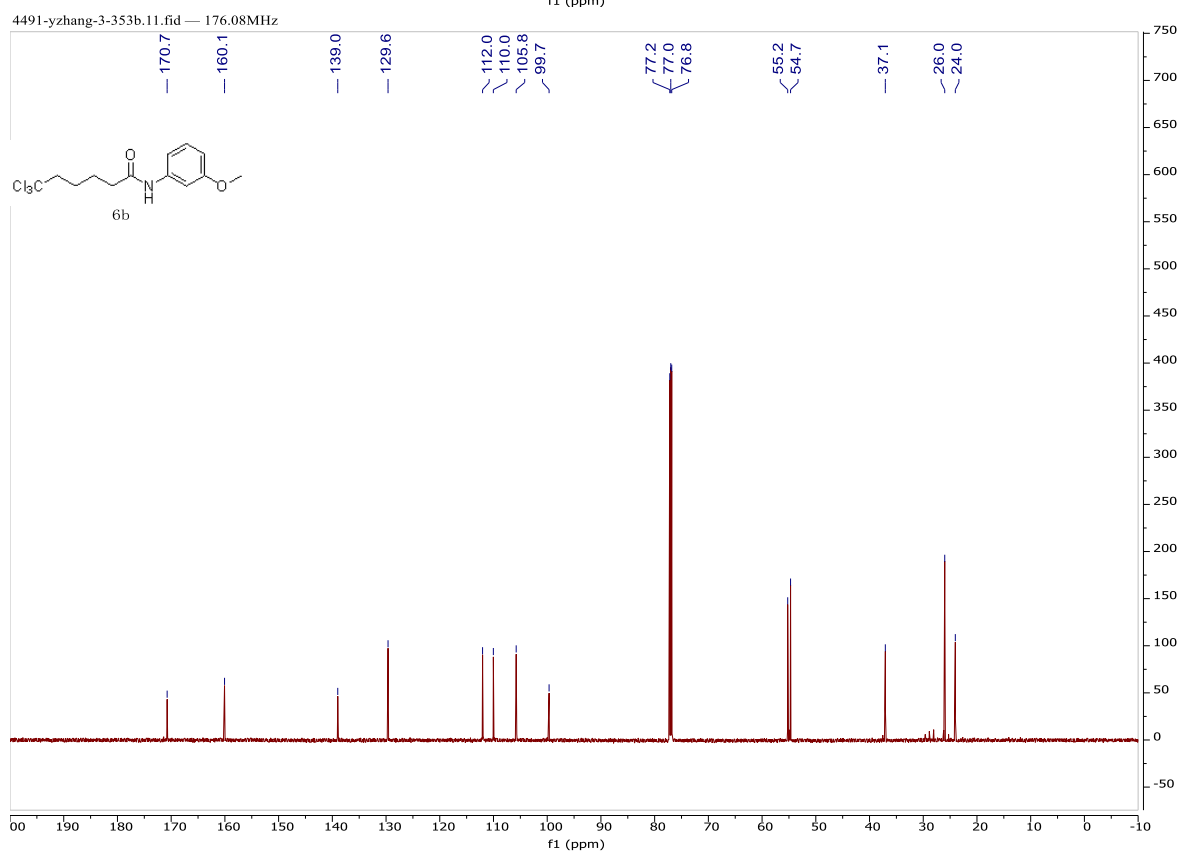

6c

7481-yzhang-3-338b.10.fid — PROTON CDCl3 {D:\NMR400\DNL0604} nmr-new 35400.13MHz

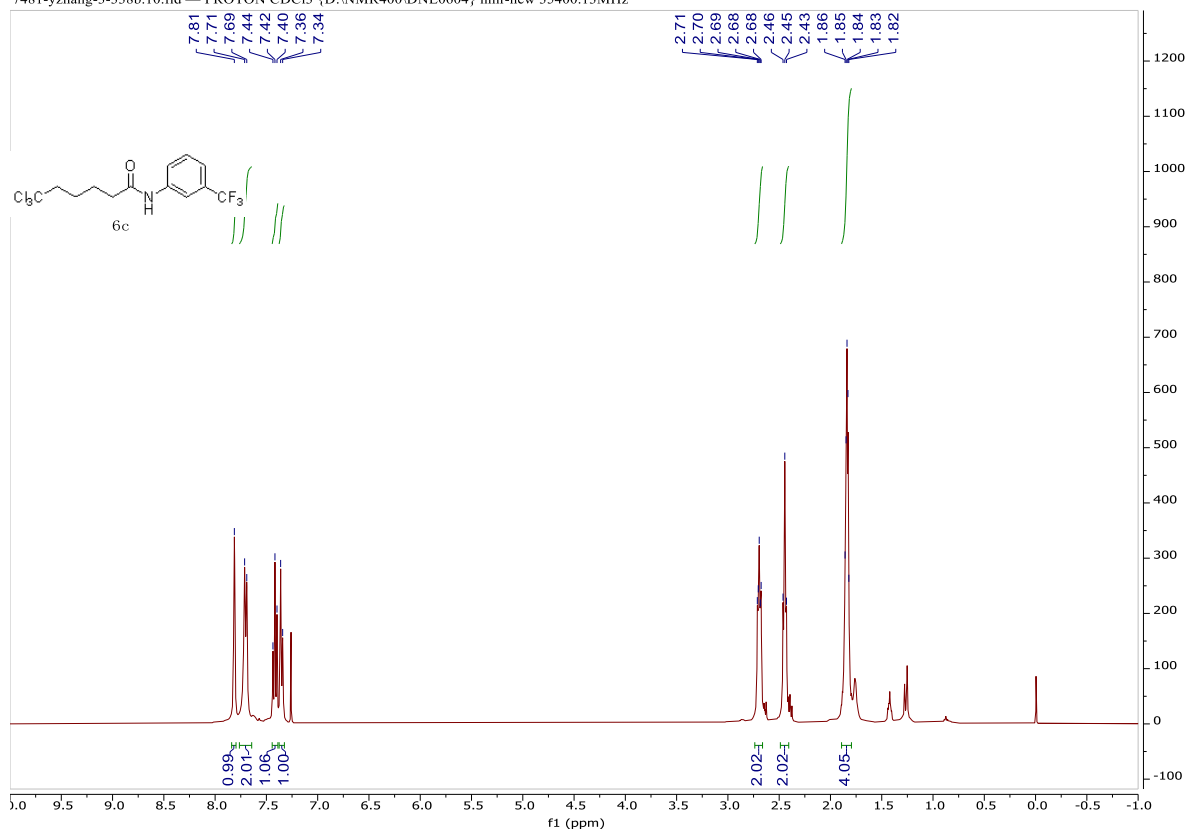

7481-yzhang-3-338b.11.fid — C13CPD CDCl3 {D:\NMR400\DNL0604} nmr-new 35100.62MHz

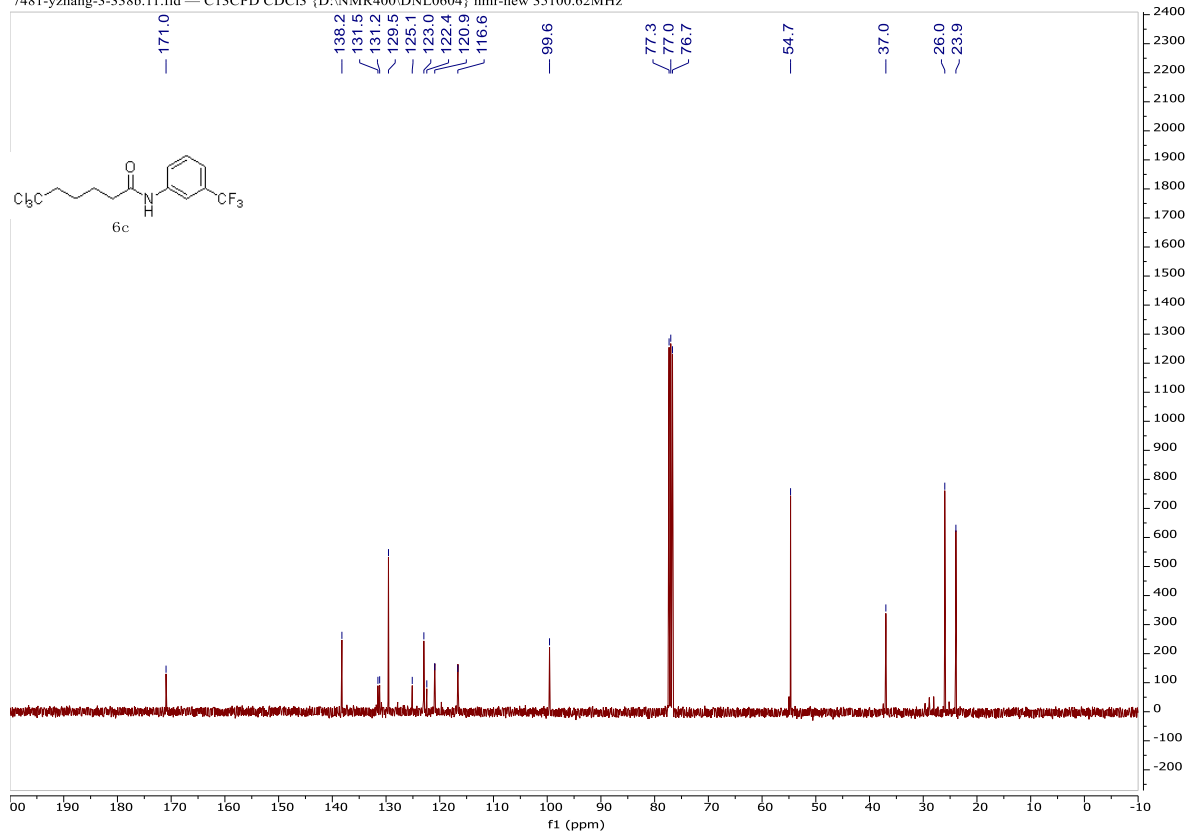

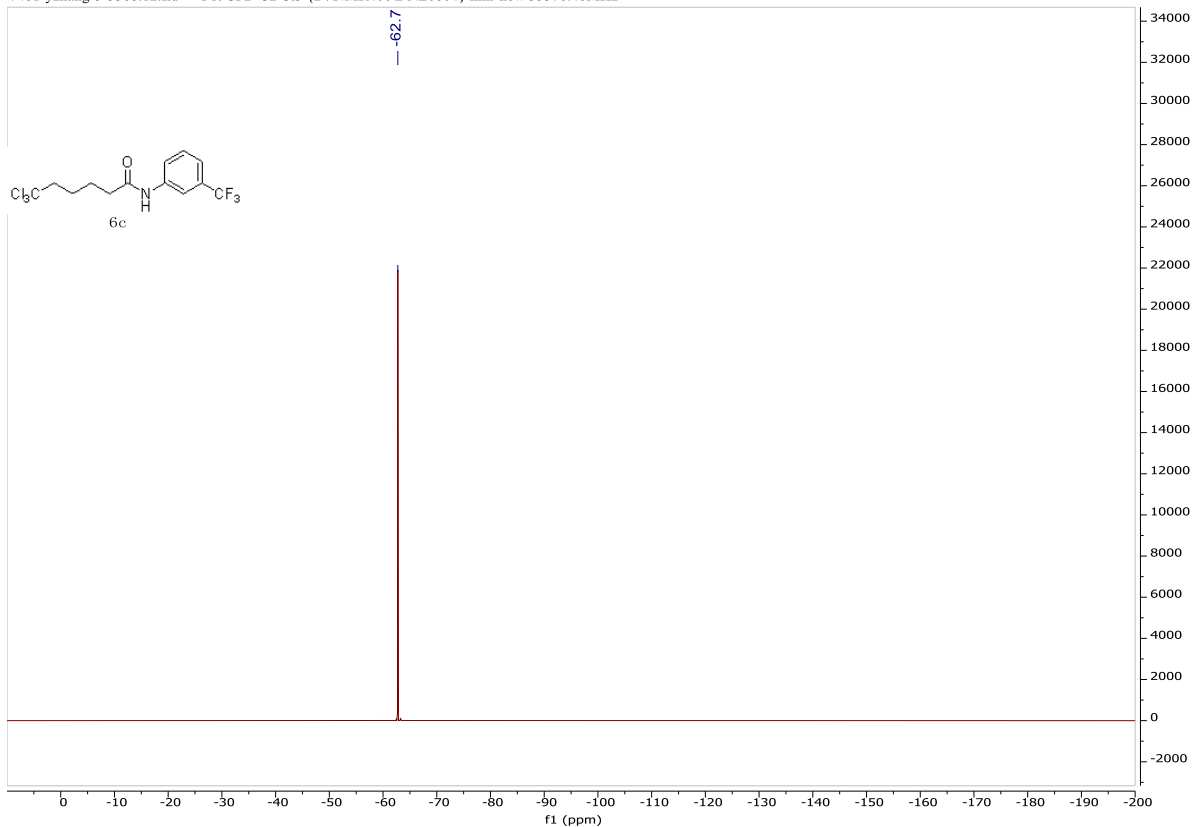

6d

7481-yzhang-3-336b.10.fid — PROTON CDCl3 {D:\NMR400\DNL0604} nmr-new 34400.13MHz

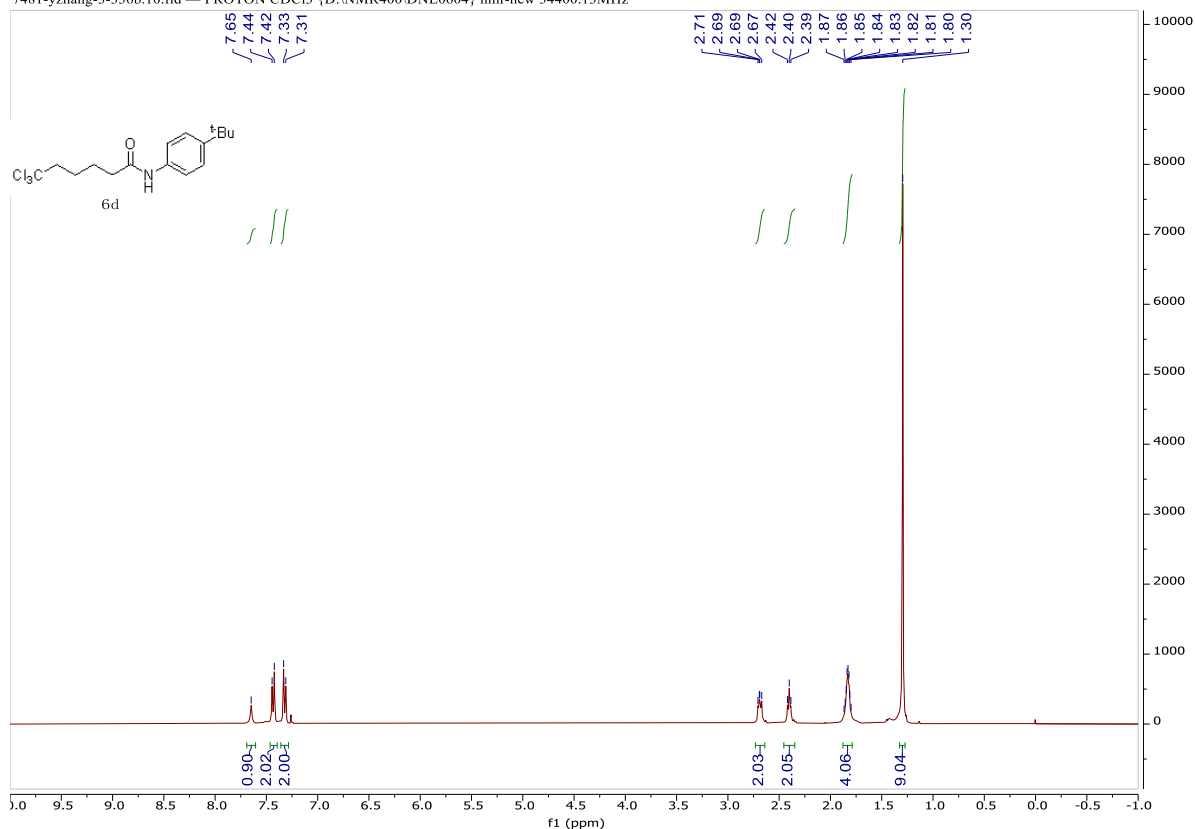

7481-yzhang-3-336b.11.fid — C13CPD CDCl3 {D:\NMR400\DNL0604} nmr-new 34100.62MHz

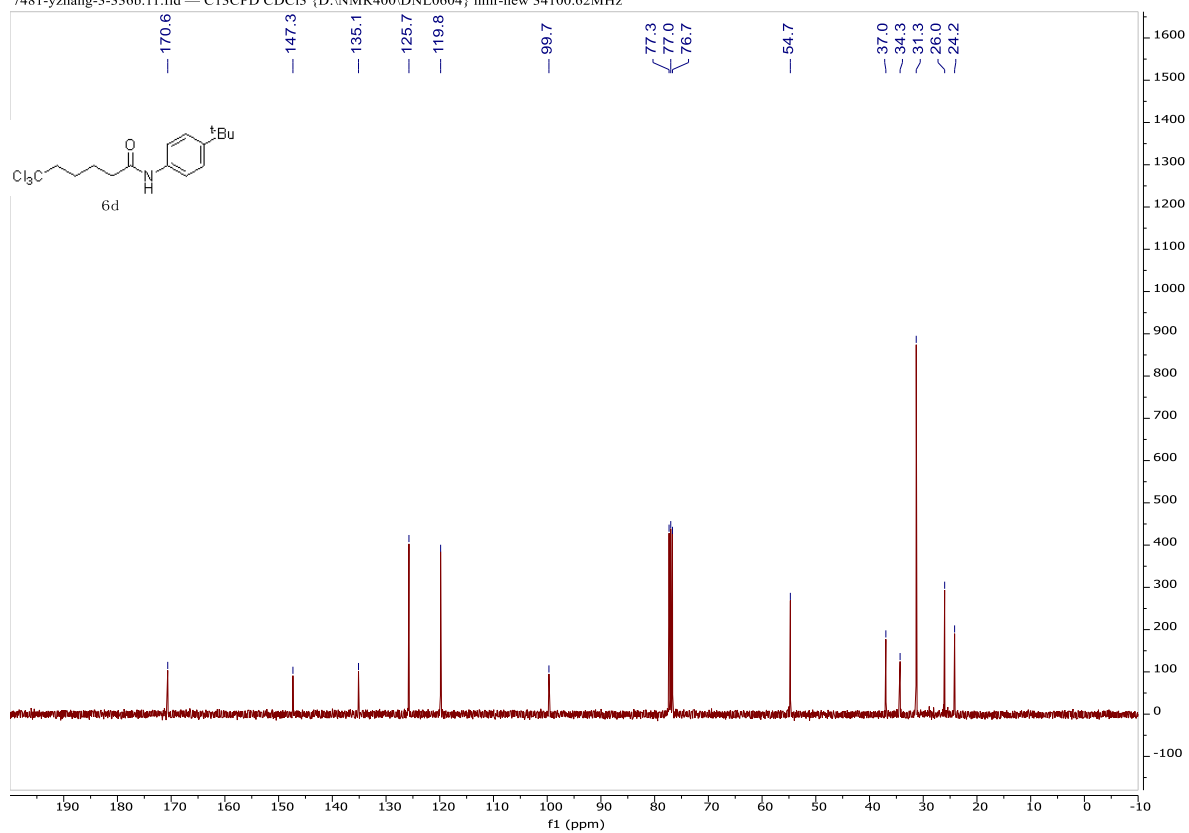



6e

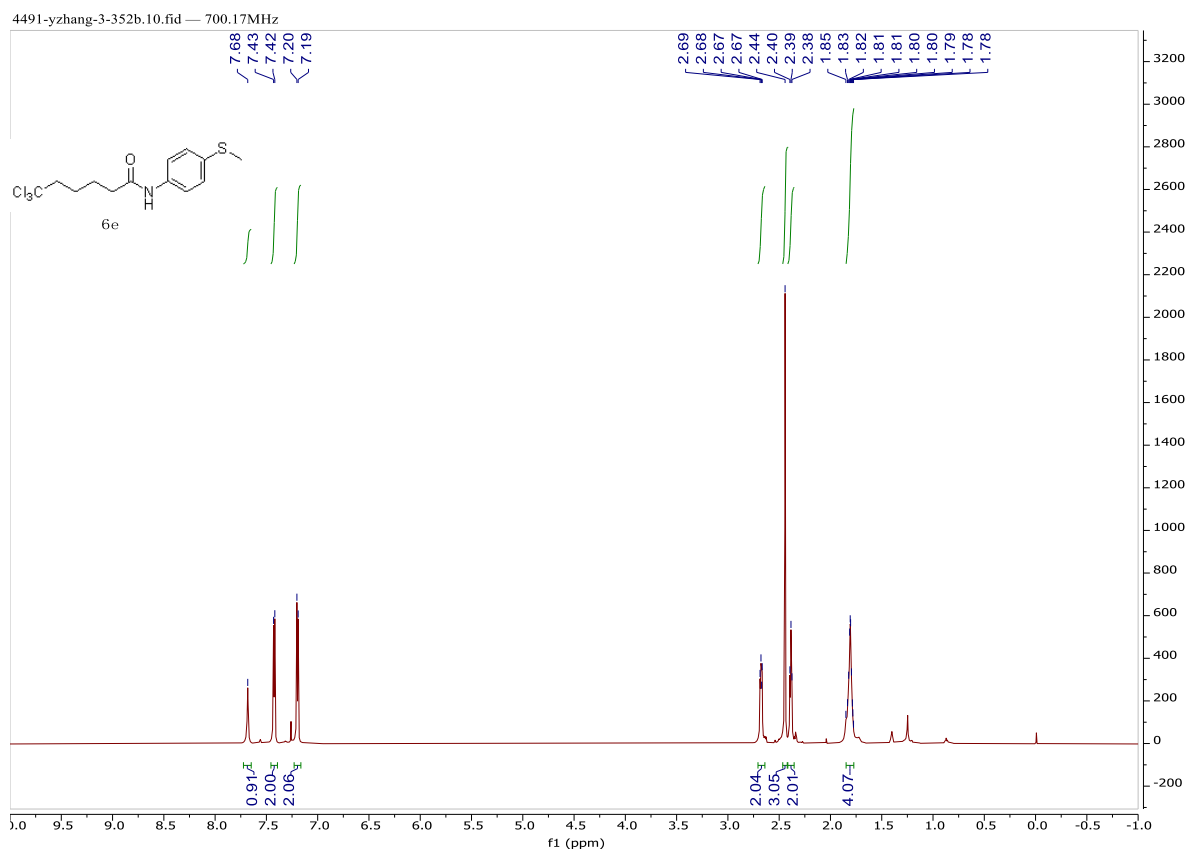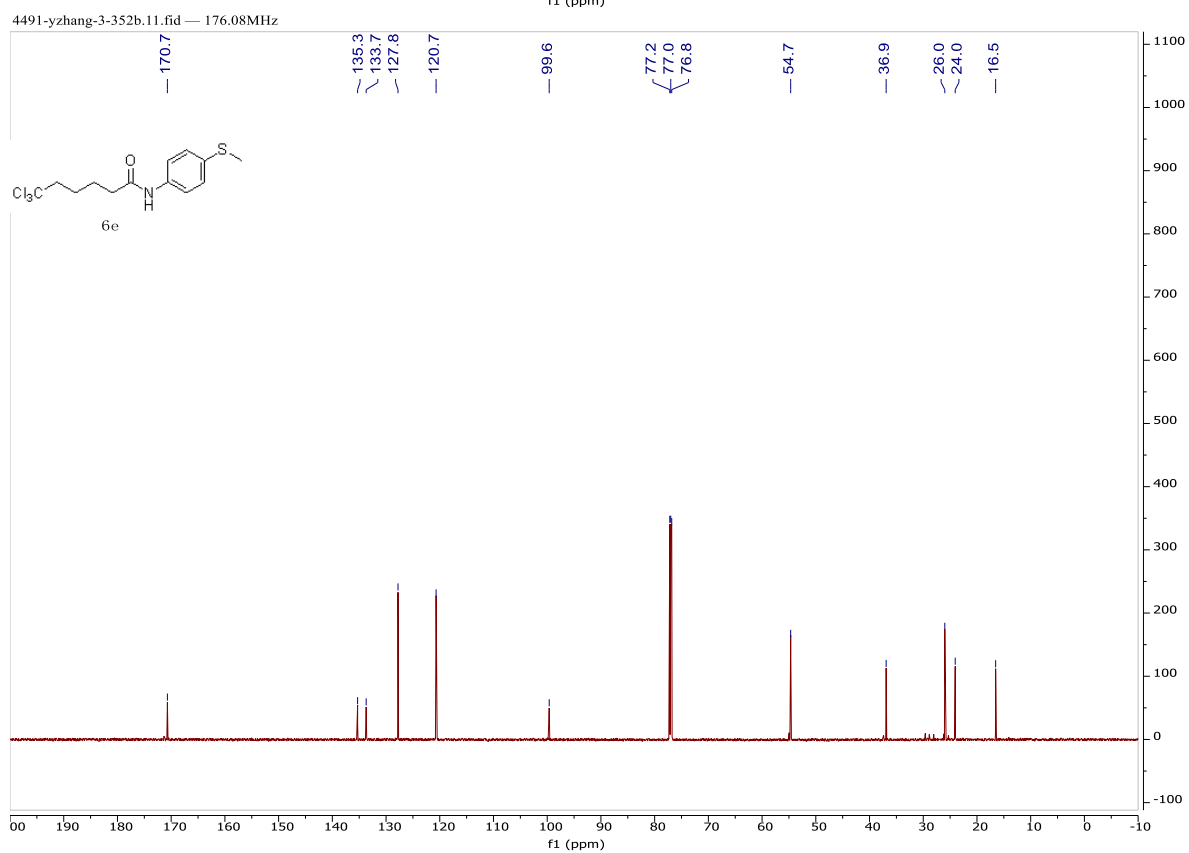

6f

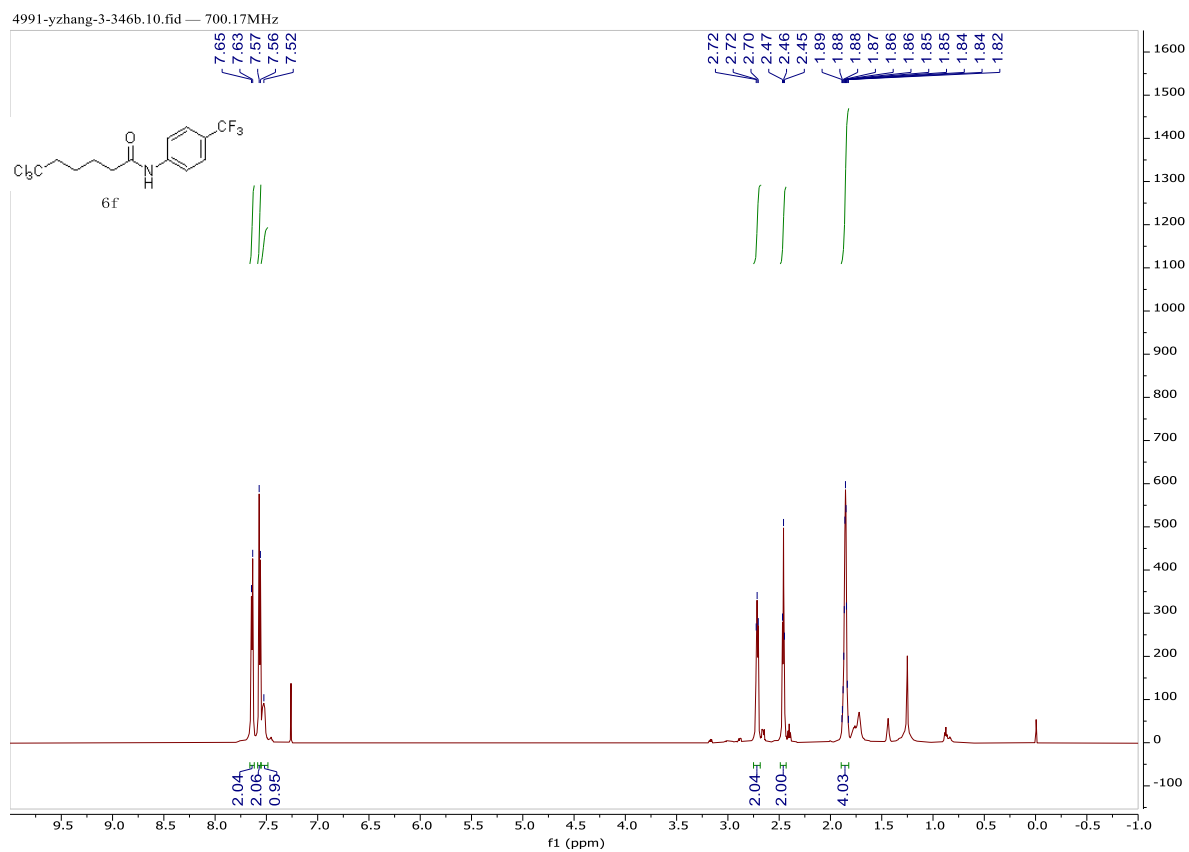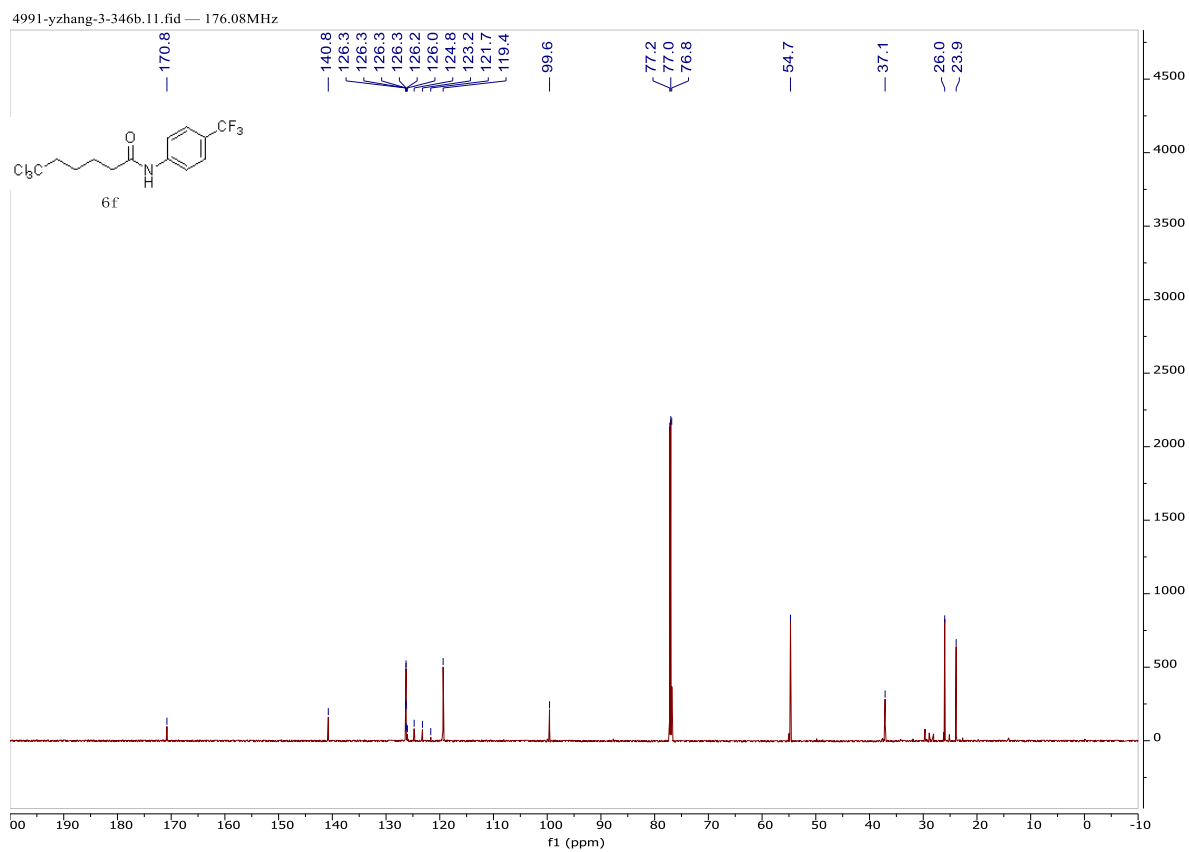

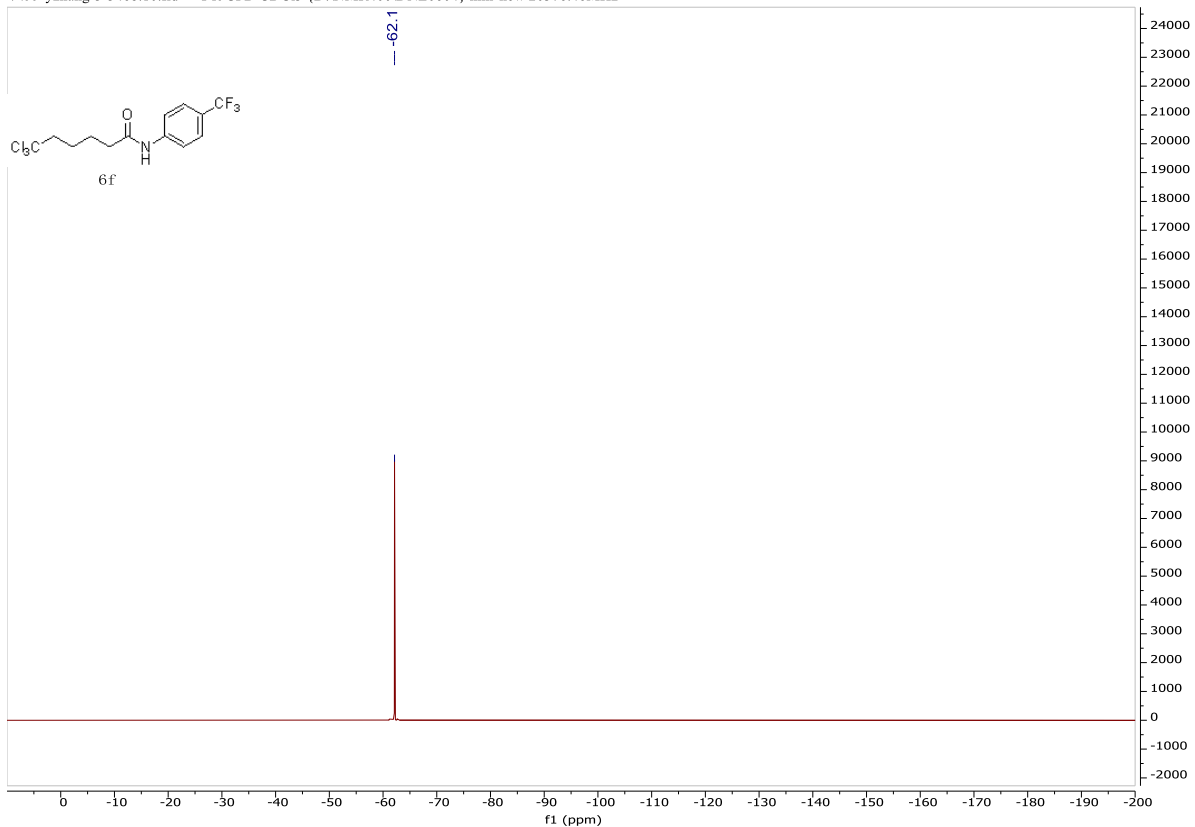

6g

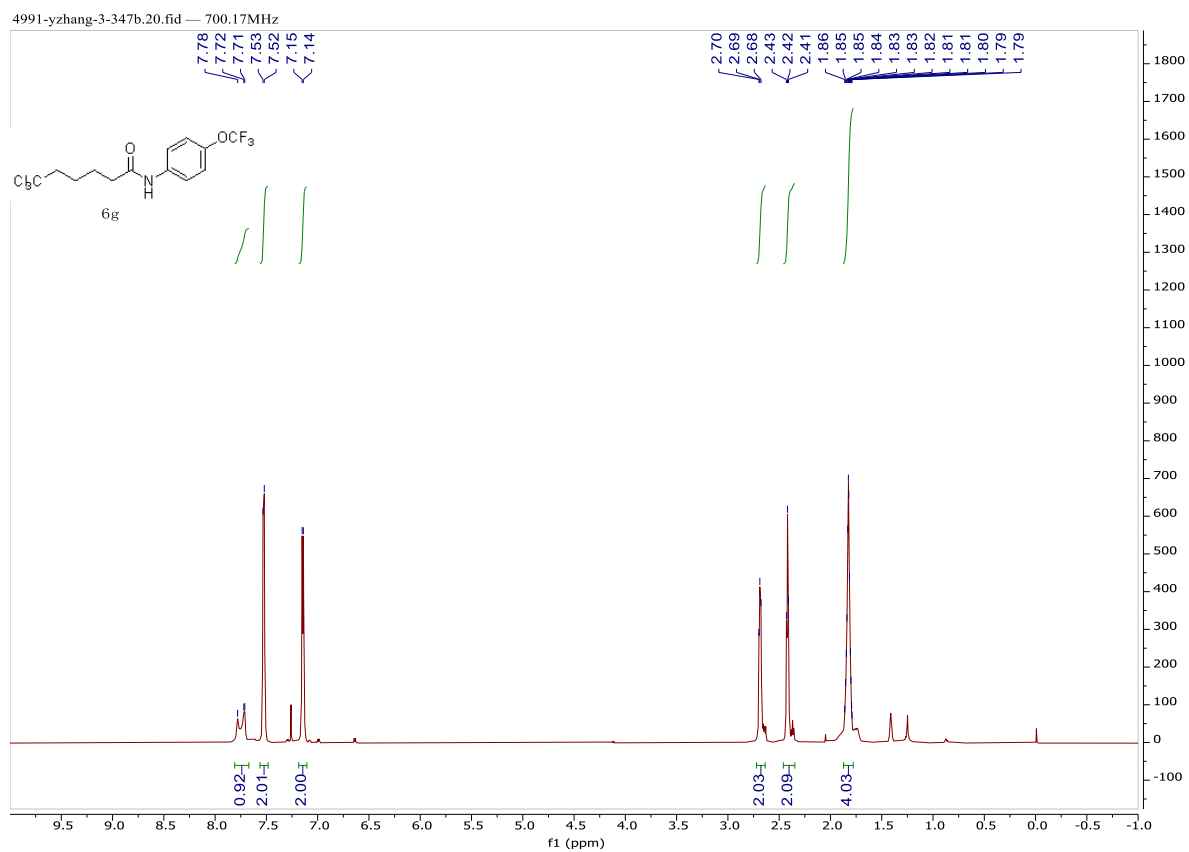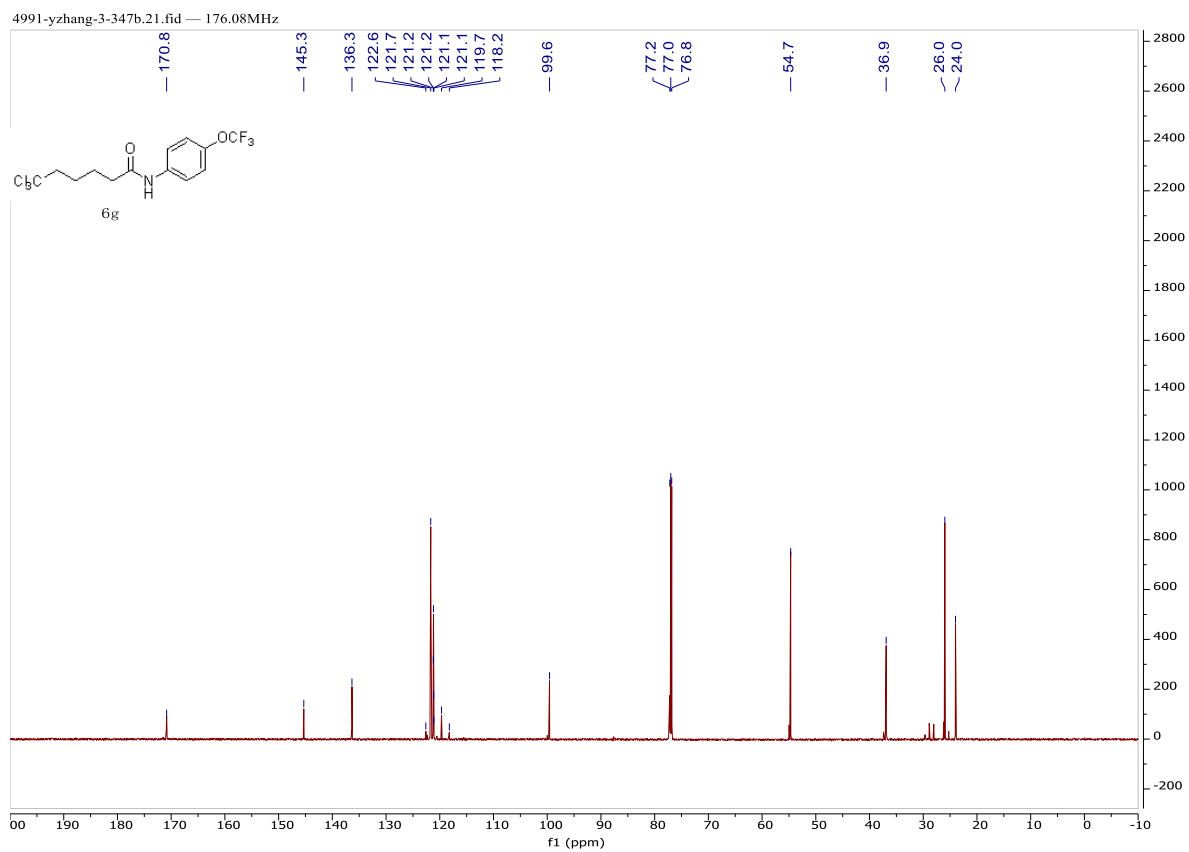

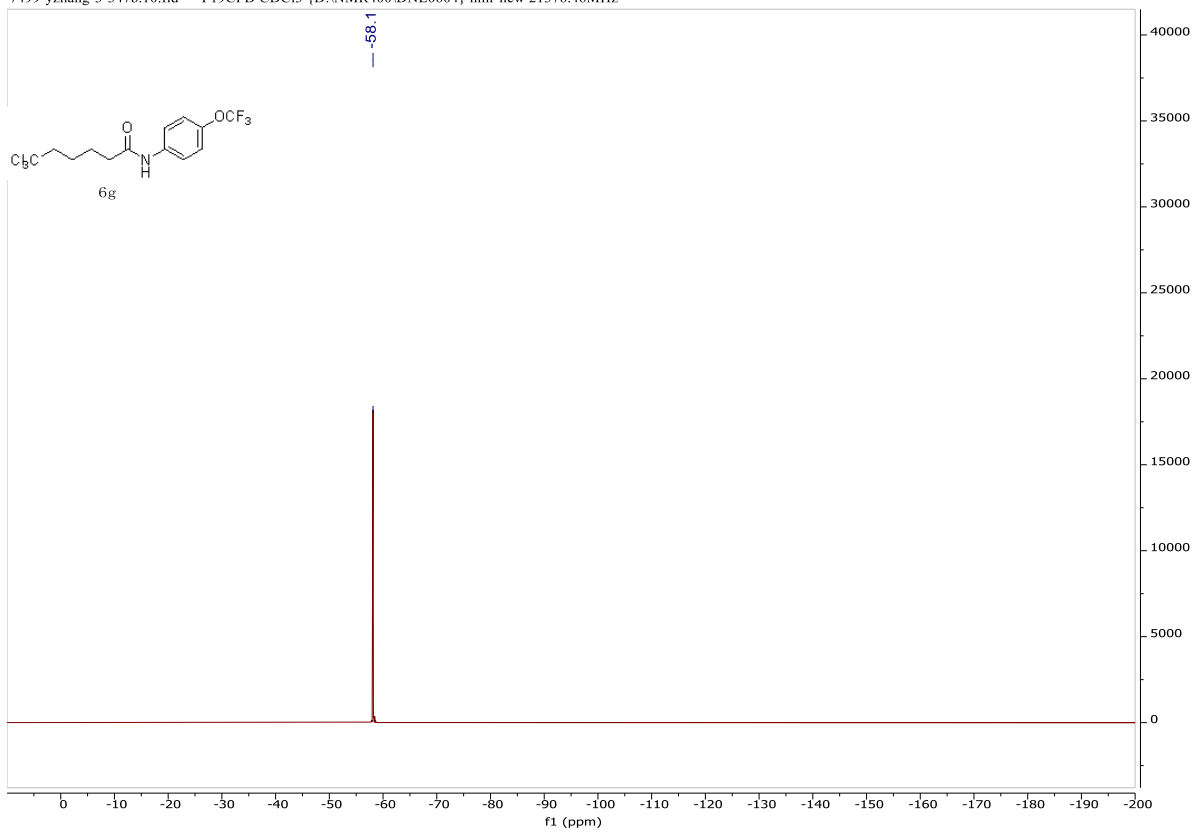

6h

7499-yzhang-3-341b.10.fid — PROTON CDCI3 {D:\NMR400\DNL0604} nmr-new 24400.13MHz

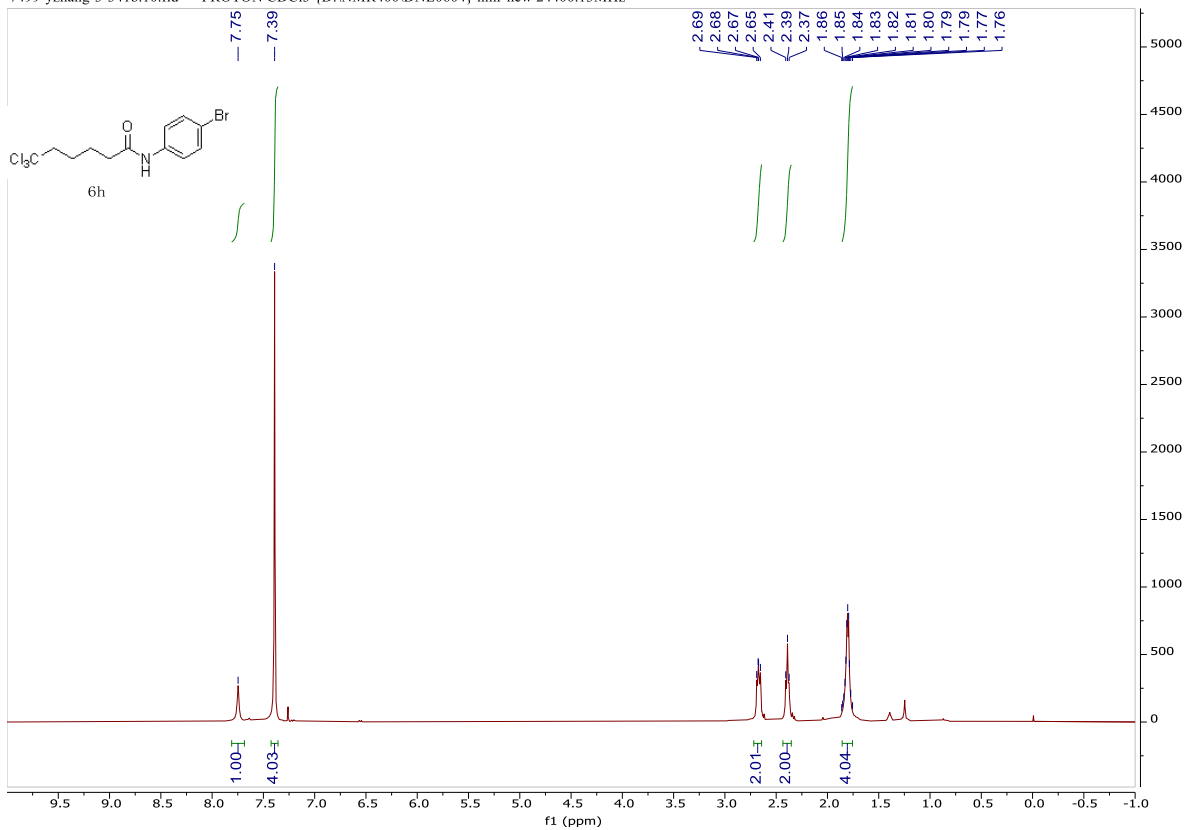

7499-yzhang-3-341b.11.fid — C13CPD CDCI3 {D:\NMR400\DNL0604} nmr-new 24100.62MHz

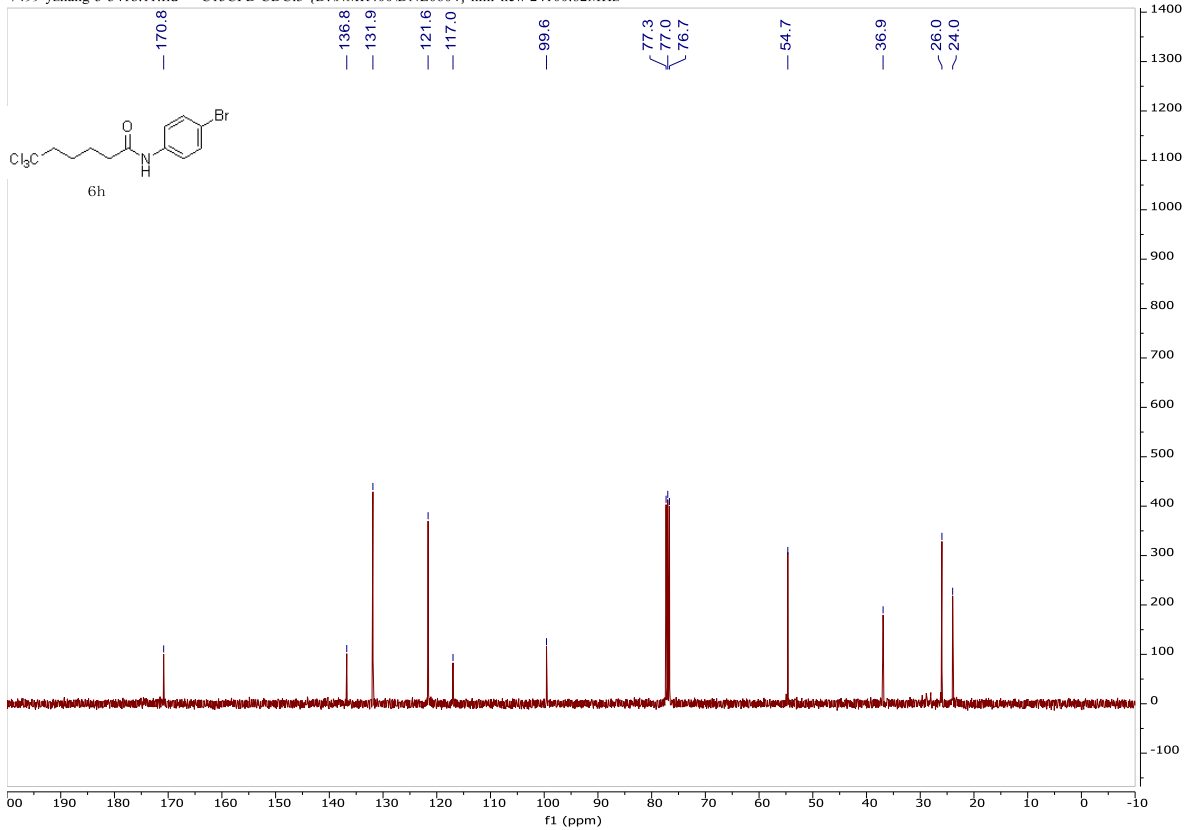

6i

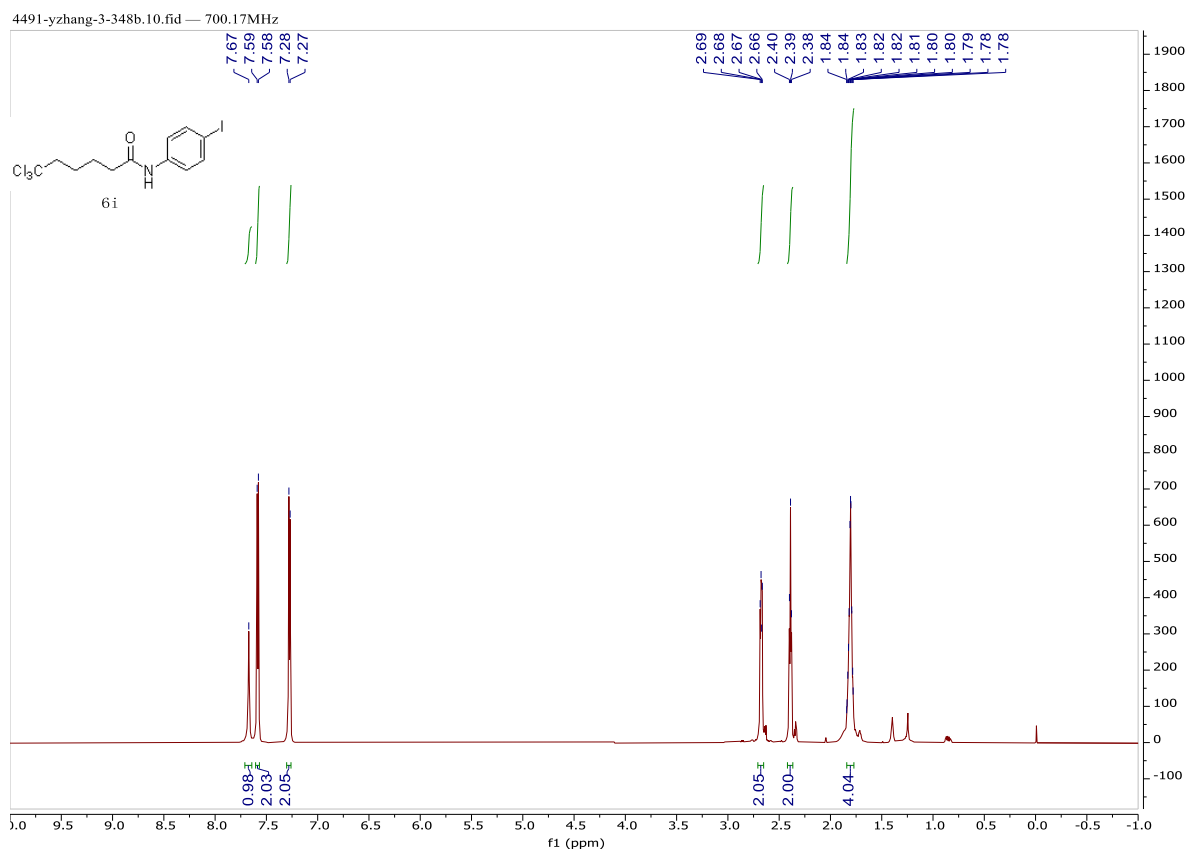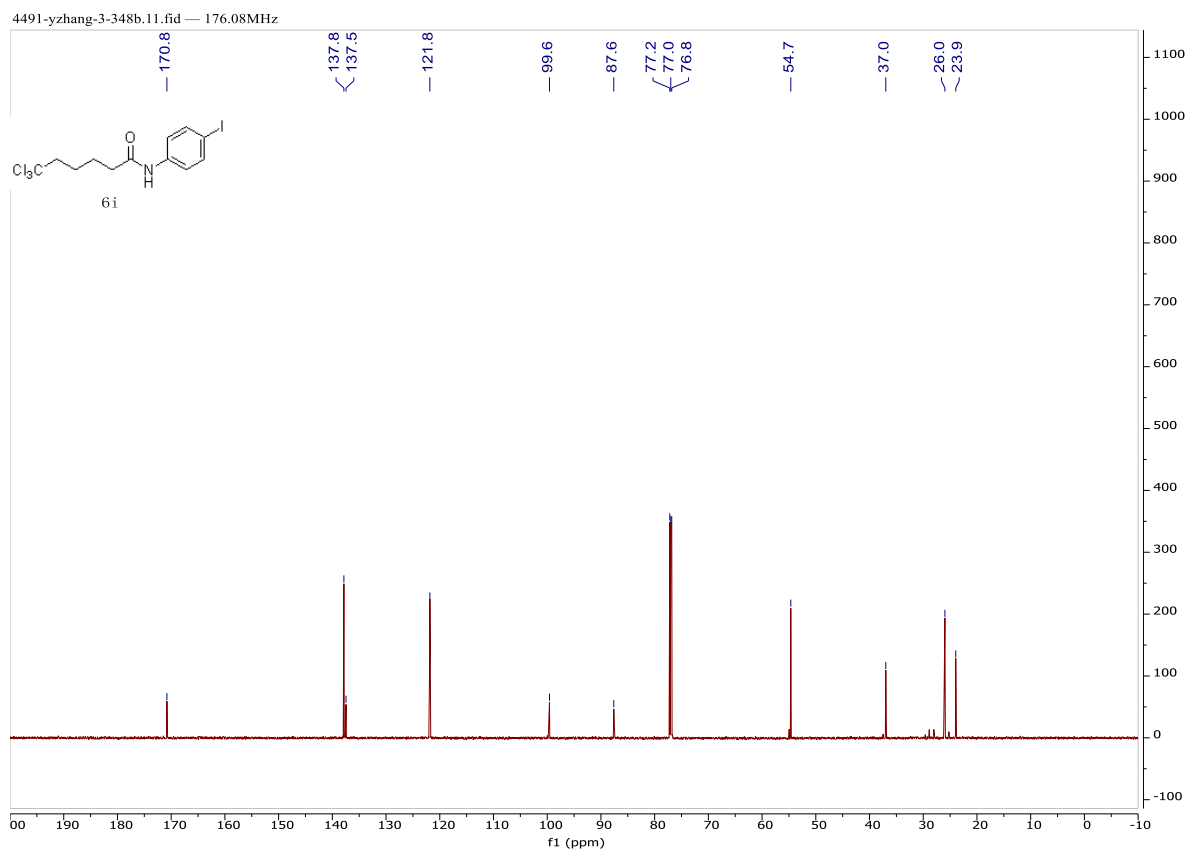

Supplement: d3sc05530b1.pdf [file d3sc05530b1.pdf]
